# Supplementary material
Source: PubMed Central journal article supplement (PMC4017616)

# Carboxylate-Assisted C(sp<sup>3</sup>)–H Activation in Olefin Metathesis-Relevant Ruthenium Complexes

Jeffrey S. Cannon,<sup>†</sup> Lufeng Zou,<sup>‡</sup> Peng Liu,<sup>‡</sup> Yu Lan,<sup>‡</sup> Daniel J. O’Leary,<sup>§</sup> K. N. Houk,<sup>‡</sup> and Robert H. Grubbs<sup>†</sup>

<sup>†</sup>*Arnold and Mabel Beckman Laboratory of Chemical Synthesis, Division of Chemistry and Chemical Engineering, California Institute of Technology, Pasadena, California 91125, United States*

<sup>‡</sup>*Department of Chemistry and Biochemistry, University of California, Los Angeles, California 90095-1569, United States*

<sup>§</sup>*Department of Chemistry, Pomona College, Claremont, California, 91711*

## Supporting Information

|                                                                                  |           |
|----------------------------------------------------------------------------------|-----------|
| Part 1. Experimental Results                                                     | S2–S35    |
| • Kinetics Experiments and Data                                                  | S4–S66    |
| • Synthesis and Characterization<br>of new compounds                             | S67–S81   |
| Part 2. Computational Results                                                    | S82–S119  |
| • Complete Reference of Gaussian 09                                              | S82       |
| • Calculation details for Table 2                                                | S83       |
| • Charge Analysis of <b>6a</b> and <b>12a-TS</b>                                 | S84       |
| • Additional Geometries                                                          | S85       |
| • Data sheet for Complexes and Transition State Geometries                       | S86       |
| • The Cartesian Coordinates (Å) for Complexes<br>and Transition State Geometries | S87–S119  |
| Part 3. NMR spectra of New Compounds                                             | S120–S176 |
| • <sup>1</sup> H NMR and <sup>13</sup> C NMR spectra                             | S120–S176 |

## **Part 1. Experimental Results**

**General Procedures.** All reactions were carried out using oven-dried glassware under an atmosphere of Ar or N<sub>2</sub> unless otherwise indicated. Ruthenium complex **4b** was obtained from Materia, Inc. and used as received. All solvents were purified by passage through solvent purification columns and further degassed by bubbling argon. Deuterated solvents were obtained from Cambridge Isotope Labs, and used as received except benzene, which was degassed by bubbling argon and dried by passage through a solvent purification column. 1-aminoadamantane-2,2,8,8,9,9-*d*<sub>6</sub> (Catalog No. D-7085) was purchased from CDN Isotopes, Incorporated (Point Claire, Quebec, CA). The certificate of isotopic analysis reads: 98.1% deuteration at the 2,8,9-positions, 9% deuteration at the 3,5,7-positions, and 17% deuteration at the 4,6,10-positions. Using these percentages, the computed the MW of the supplied compound is 158.39 g/mol. All other commercial reagents were used as received unless otherwise noted. Silica gel chromatography was performed using 230–400 mesh silica gel purchased from Merck. Thin-layer chromatography utilized EMD Sciences silica gel 60 F254 pre-cast glass plates (Cat. No. 1.05714.0001). Microwave-assisted chemistry utilized a Biotage Initiator 2.5 reactor. <sup>1</sup>H NMR (500 MHz) and <sup>13</sup>C NMR (125 MHz) spectra were obtained on Varian FT NMR instruments. NMR spectra were reported as δ values in ppm relative to the reported solvent (CDCl<sub>3</sub> calibrated to 7.27, C<sub>6</sub>D<sub>6</sub> calibrated to 7.16, 1:1 THF-*d*<sub>8</sub>:CD<sub>3</sub>OD calibrated to THF signal at 3.58). Splitting patterns are abbreviated as follows: singlet (s), doublet (d), triplet (t), quartet (q), multiplet (m), broad (b), apparent (app) and combinations thereof. High-resolution mass spectra (HRMS) were provided by the California Institute of Technology Mass Spectrometry Facility using a JEOL JMS-600H High Resolution Mass Spectrometer. All HRMS were by positive-ion FAB.

Compounds **3a**, **3b**, **3c**, **3d**, **4c**, **4d**, **5b**, and **6b** were synthesized according to their literature procedures and were confirmed by spectroscopic analysis (NMR).

## Kinetics Procedures and Data.

### General Procedure for Kinetics Experiments.

Three stock solutions were prepared prior to kinetics experiments: (1) 0.05–0.09 M ruthenium bistriflate in THF- $d_8$ ; (2) 0.17 M trimethoxybenzene in THF- $d_8$ ; (3) 0.28–0.51 M sodium pivalate in CD<sub>3</sub>OD.

In a nitrogen filled glovebox, 0.20 mL of a 0.07 M THF- $d_8$  solution of ruthenium bistriflate **7a** (0.0144 mmol) was added to a J-Young NMR tube followed by 0.05 mL of a 0.17 M THF- $d_8$  solution of trimethoxybenzene (0.0083 mmol). An additional 0.1 mL of THF- $d_8$  was added for a total volume of 0.35 mL THF- $d_8$ . The J-Young tube was sealed and removed from the glovebox. The bistriflate solution was then cooled to  $-78$  °C in a dry ice/acetone bath under an argon atmosphere and 0.35 mL of a 0.41 M CD<sub>3</sub>OD solution of sodium pivalate (0.144 mmol) was injected. The J-Young tube was sealed, and maintained at  $-78$  °C while preparing the NMR spectrometer. The probe of an NMR spectrometer was cooled to 0 °C. The sample tube was removed from the dry-ice/acetone bath, mixed by inverting multiple times, and allowed to warm to 0 °C inside of the NMR spectrometer. <sup>1</sup>H NMR data was collected to ensure full conversion of bistriflate **7a** to dipivalate **6a**. Once full conversion was observed, the sample tube was removed from the spectrometer and returned to the  $-78$  °C dry-ice/acetone bath. The spectrometer probe was then warmed to 40 °C, and the temperature checked by insertion of a thermocouple into the probe. The sample tube was then inserted into the pre-warmed spectrometer, and <sup>1</sup>H NMR data was collected periodically (approx. every 5 minutes) until full consumption of the dipivalate complex was observed. Arrayed spectral data was processed using MestReNova 8, and analyzed in Microsoft Excel.

### Kinetics Experiments from Complex **7a**

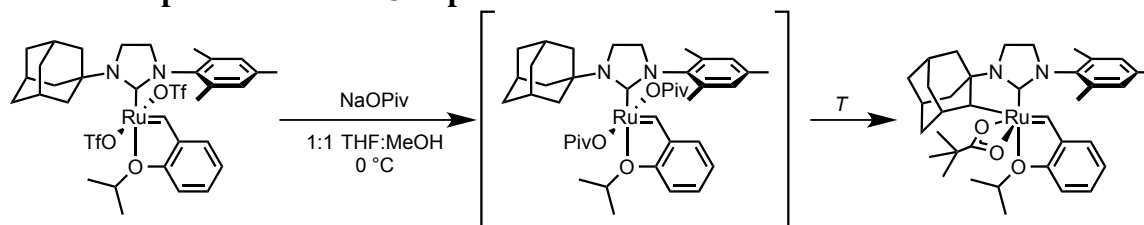

**287.3 K**

| run     | $k$ (sec <sup>-1</sup> ) |
|---------|--------------------------|
| 1       | 9.4(1)x10 <sup>-5</sup>  |
| 2       | 9.2(1)x10 <sup>-5</sup>  |
| average | 9.3(1)x10 <sup>-5</sup>  |

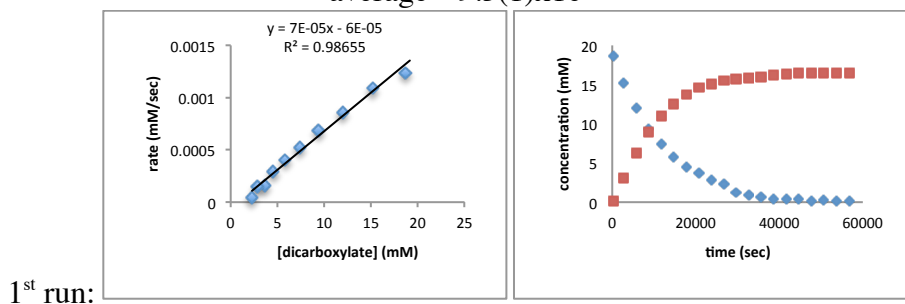

SUMMARY OUTPUT

| <i>Regression Statistics</i> |          |
|------------------------------|----------|
| Multiple R                   | 0.844137 |
| R Square                     | 0.712567 |
| Adjusted R                   | 0.69888  |
| Standard E                   | 0.000165 |
| Observations                 | 23       |

| ANOVA      |           |           |           |          |                       |
|------------|-----------|-----------|-----------|----------|-----------------------|
|            | <i>df</i> | <i>SS</i> | <i>MS</i> | <i>F</i> | <i>Significance F</i> |
| Regression | 1         | 1.42E-06  | 1.42E-06  | 52.06062 | 4.14E-07              |
| Residual   | 21        | 5.71E-07  | 2.72E-08  |          |                       |
| Total      | 22        | 1.99E-06  |           |          |                       |

|            | <i>Coefficient</i> | <i>Standard Error</i> | <i>t Stat</i> | <i>P-value</i> | <i>Lower 95%</i> | <i>Upper 95%</i> | <i>Lower 90.0%</i> | <i>Upper 90.0%</i> |
|------------|--------------------|-----------------------|---------------|----------------|------------------|------------------|--------------------|--------------------|
| Intercept  | 0.001418           | 8.18E-05              | 17.32379      | 6.49E-14       | 0.001248         | 0.001588         | 0.001277           | 0.001559           |
| X Variable | -7.2E-05           | 9.97E-06              | -7.2153       | 4.14E-07       | -9.3E-05         | -5.1E-05         | -8.9E-05           | -5.5E-05           |

RESIDUAL OUTPUT

| <i>Observation</i> | <i>Predicted Y</i> | <i>Residuals</i> | <i>Standard Residuals</i> |
|--------------------|--------------------|------------------|---------------------------|
| 1                  | 0.001361           | -0.00021         | -1.27603                  |
| 2                  | 0.001289           | 0.000365         | 2.266668                  |
| 3                  | 0.001251           | -0.00037         | -2.31924                  |
| 4                  | 0.001197           | 6.57E-05         | 0.407876                  |
| 5                  | 0.001141           | 0.000146         | 0.90367                   |
| 6                  | 0.0011             | -0.00014         | -0.87858                  |
| 7                  | 0.001052           | 6.8E-05          | 0.42234                   |
| 8                  | 0.001005           | 7.8E-05          | 0.484324                  |
| 9                  | 0.000962           | 3.31E-05         | 0.20521                   |
| 10                 | 0.000925           | -6.6E-05         | -0.40898                  |
| 11                 | 0.000875           | 0.000274         | 1.699133                  |
| 12                 | 0.000843           | -9.1E-05         | -0.56297                  |
| 13                 | 0.000815           | -0.00018         | -1.10258                  |
| 14                 | 0.000777           | 0.000119         | 0.741592                  |
| 15                 | 0.000742           | 6.6E-05          | 0.409774                  |
| 16                 | 0.000714           | -6.3E-05         | -0.39091                  |
| 17                 | 0.000676           | 0.000186         | 1.151923                  |
| 18                 | 0.000651           | -6.2E-05         | -0.3851                   |
| 19                 | 0.000629           | -0.00011         | -0.66086                  |
| 20                 | 0.000605           | -7.2E-05         | -0.44605                  |
| 21                 | 0.00058            | 4.58E-06         | 0.028405                  |



2<sup>nd</sup> run:

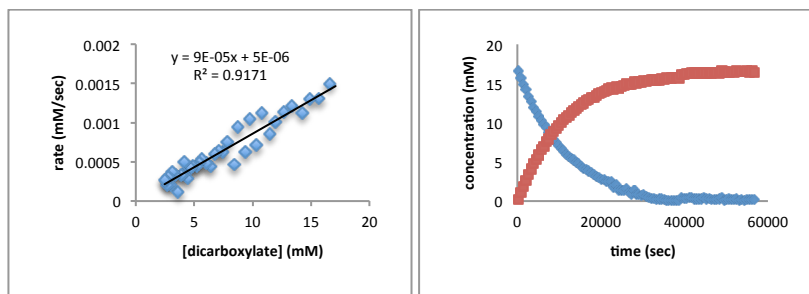

SUMMARY OUTPUT

| <u>Regression Statistics</u> |          |
|------------------------------|----------|
| Multiple R                   | 0.884573 |
| R Square                     | 0.78247  |
| Adjusted R                   | 0.772112 |
| Standard E                   | 0.000165 |
| Observations                 | 23       |

ANOVA

|            | <i>df</i> | <i>SS</i> | <i>MS</i> | <i>F</i> | <i>Significance F</i> |
|------------|-----------|-----------|-----------|----------|-----------------------|
| Regression | 1         | 2.05E-06  | 2.05E-06  | 75.53851 | 2.13E-08              |
| Residual   | 21        | 5.69E-07  | 2.71E-08  |          |                       |
| Total      | 22        | 2.62E-06  |           |          |                       |

|            | <i>Coefficients</i> | <i>Standard Error</i> | <i>t Stat</i> | <i>P-value</i> | <i>Lower 95%</i> | <i>Upper 95%</i> | <i>Lower 90.0%</i> | <i>Upper 90.0%</i> |
|------------|---------------------|-----------------------|---------------|----------------|------------------|------------------|--------------------|--------------------|
| Intercept  | -1.2E-05            | 0.000105              | -0.1139       | 0.910397       | -0.00023         | 0.000206         | -0.00019           | 0.000168           |
| X Variable | 9.23E-05            | 1.06E-05              | 8.691289      | 2.13E-08       | 7.02E-05         | 0.000114         | 7.4E-05            | 0.000111           |

RESIDUAL OUTPUT

| <i>Observation</i> | <i>Predicted Y</i> | <i>Residuals</i> | <i>Standard Residuals</i> |
|--------------------|--------------------|------------------|---------------------------|
| 1                  | 0.001434           | 0.000125         | 0.775526                  |
| 2                  | 0.001362           | -6.1E-05         | -0.37625                  |
| 3                  | 0.0013             | -0.00019         | -1.1763                   |
| 4                  | 0.001221           | 0.000214         | 1.329468                  |
| 5                  | 0.001154           | 5.7E-05          | 0.35412                   |
| 6                  | 0.001092           | 2.82E-05         | 0.175358                  |
| 7                  | 0.001045           | -0.00019         | -1.20321                  |
| 8                  | 0.000986           | 7.6E-05          | 0.472606                  |
| 9                  | 0.000941           | -0.00013         | -0.80967                  |
| 10                 | 0.000887           | 8.71E-05         | 0.541212                  |
| 11                 | 0.000853           | -0.00024         | -1.51713                  |
| 12                 | 0.000792           | 0.000308         | 1.91613                   |
| 13                 | 0.000766           | -0.00029         | -1.81284                  |
| 14                 | 0.000711           | 0.000275         | 1.706596                  |
| 15                 | 0.000678           | -6.8E-05         | -0.42281                  |
| 16                 | 0.000647           | -8.5E-05         | -0.52629                  |
| 17                 | 0.000609           | 6.7E-05          | 0.416295                  |
| 18                 | 0.000578           | -1.4E-05         | -0.0892                   |
| 19                 | 0.000542           | 0.000101         | 0.625031                  |
| 20                 | 0.000508           | 0.00012          | 0.745749                  |
| 21                 | 0.00049            | -0.00017         | -1.08685                  |

298 K

| run     | $k$ (sec <sup>-1</sup> ) |
|---------|--------------------------|
| 1       | $2.17 \times 10^{-4}$    |
| 2       | $2.8(3) \times 10^{-4}$  |
| 3       | $3.2(3) \times 10^{-4}$  |
| average | $2.7(3) \times 10^{-4}$  |

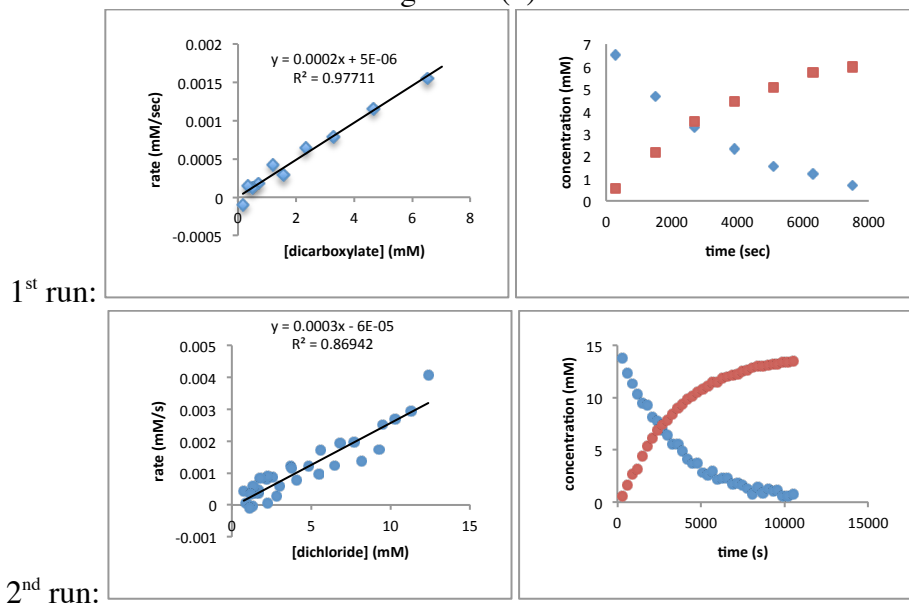

SUMMARY OUTPUT

| <i>Regression Statistics</i> |          |
|------------------------------|----------|
| Multiple R                   | 0.878706 |
| R Square                     | 0.772124 |
| Adjusted R                   | 0.76073  |
| Standard E                   | 0.000507 |
| Observations                 | 22       |

| <i>ANOVA</i> |           |           |           |          |                       |
|--------------|-----------|-----------|-----------|----------|-----------------------|
|              | <i>df</i> | <i>SS</i> | <i>MS</i> | <i>F</i> | <i>Significance F</i> |
| Regressor    | 1         | 1.75E-05  | 1.75E-05  | 67.7669  | 7.47E-08              |
| Residual     | 20        | 5.15E-06  | 2.58E-07  |          |                       |
| Total        | 21        | 2.26E-05  |           |          |                       |

|            | <i>Coefficients</i> | <i>Standard Error</i> | <i>t Stat</i> | <i>P-value</i> | <i>Lower 95%</i> | <i>Upper 95%</i> | <i>Lower 90.0%</i> | <i>Upper 90.0%</i> |
|------------|---------------------|-----------------------|---------------|----------------|------------------|------------------|--------------------|--------------------|
| Intercept  | 0.00411             | 0.000305              | 13.48442      | 1.69E-11       | 0.003474         | 0.004746         | 0.003585           | 0.004636           |
| X Variable | -0.00028            | 3.41E-05              | -8.23207      | 7.47E-08       | -0.00035         | -0.00021         | -0.00034           | -0.00022           |

RESIDUAL OUTPUT

| <i>Observation</i> | <i>Predicted Y</i> | <i>Residuals</i> | <i>Standard Residuals</i> |
|--------------------|--------------------|------------------|---------------------------|
| 1                  | 0.003646           | -6.2E-05         | -0.12468                  |
| 2                  | 0.003359           | 4E-05            | 0.080757                  |
| 3                  | 0.003205           | -0.00138         | -2.77937                  |
| 4                  | 0.002863           | 0.001201         | 2.425862                  |
| 5                  | 0.002615           | 0.000323         | 0.65184                   |
| 6                  | 0.002388           | 0.000316         | 0.638561                  |
| 7                  | 0.002175           | 0.00035          | 0.706562                  |
| 8                  | 0.00203            | -0.00031         | -0.61659                  |
| 9                  | 0.001914           | -0.00054         | -1.08616                  |
| 10                 | 0.001749           | 0.000203         | 0.409626                  |
| 11                 | 0.001586           | 0.000347         | 0.701085                  |
| 12                 | 0.001482           | -0.00025         | -0.50173                  |
| 13                 | 0.001338           | 0.000381         | 0.769977                  |
| 14                 | 0.001257           | -0.0003          | -0.6122                   |
| 15                 | 0.001155           | 6.44E-05         | 0.130043                  |
| 16                 | 0.00109            | -0.00032         | -0.65101                  |
| 17                 | 0.000987           | 0.000231         | 0.465774                  |
| 18                 | 0.00089            | 0.000261         | 0.527111                  |
| 19                 | 0.000868           | -0.0006          | -1.21399                  |
| 20                 | 0.000795           | 7.61E-05         | 0.153759                  |
| 21                 | 0.000745           | -0.00016         | -0.32214                  |

3<sup>rd</sup> run:

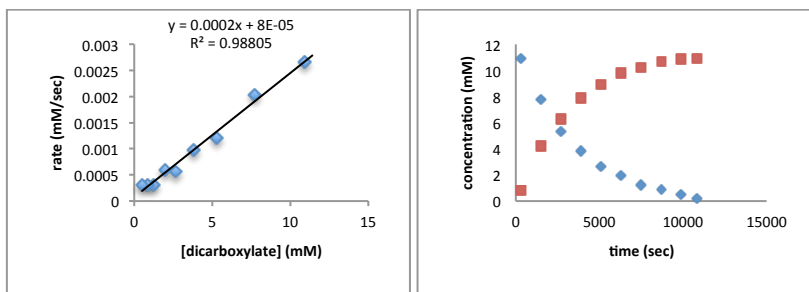

SUMMARY OUTPUT

| <u>Regression Statistics</u> |          |
|------------------------------|----------|
| Multiple R                   | 0.907531 |
| R Square                     | 0.823613 |
| Adjusted R                   | 0.814794 |
| Standard E                   | 0.00037  |
| Observations                 | 22       |

| <u>ANOVA</u> |           |           |           |          |                       |
|--------------|-----------|-----------|-----------|----------|-----------------------|
|              | <i>df</i> | <i>SS</i> | <i>MS</i> | <i>F</i> | <i>Significance F</i> |
| Regression   | 1         | 1.28E-05  | 1.28E-05  | 93.38725 | 5.61E-09              |
| Residual     | 20        | 2.74E-06  | 1.37E-07  |          |                       |
| Total        | 21        | 1.56E-05  |           |          |                       |

|            | <u>Coefficient</u> | <u>Standard Error</u> | <u>t Stat</u> | <u>P-value</u> | <u>Lower 95%</u> | <u>Upper 95%</u> | <u>Lower 90.0%</u> | <u>Upper 90.0%</u> |
|------------|--------------------|-----------------------|---------------|----------------|------------------|------------------|--------------------|--------------------|
| Intercept  | 0.003611           | 0.000244              | 14.82448      | 2.99E-12       | 0.003103         | 0.004119         | 0.003191           | 0.004031           |
| X Variable | -0.00032           | 3.27E-05              | -9.66371      | 5.61E-09       | -0.00038         | -0.00025         | -0.00037           | -0.00026           |

RESIDUAL OUTPUT

| <u>Observation</u> | <u>Predicted Y</u> | <u>Residuals</u> | <u>Standard Residuals</u> |
|--------------------|--------------------|------------------|---------------------------|
| 1                  | 0.00303            | 0.000245         | 0.67847                   |
| 2                  | 0.002762           | 6.36E-05         | 0.1758                    |
| 3                  | 0.002539           | -0.00019         | -0.53352                  |
| 4                  | 0.002284           | 0.000406         | 1.122956                  |
| 5                  | 0.002134           | -0.00056         | -1.54423                  |
| 6                  | 0.001972           | -0.00026         | -0.72085                  |
| 7                  | 0.00178            | 0.000239         | 0.659942                  |
| 8                  | 0.001632           | -6.8E-05         | -0.18737                  |
| 9                  | 0.001479           | 0.000133         | 0.369064                  |
| 10                 | 0.00135            | 7.94E-06         | 0.021955                  |
| 11                 | 0.001242           | -0.00011         | -0.29169                  |
| 12                 | 0.001114           | 0.000233         | 0.645841                  |
| 13                 | 0.001022           | -5.4E-05         | -0.14972                  |
| 14                 | 0.000941           | -8.2E-05         | -0.22632                  |
| 15                 | 0.000867           | -9.1E-05         | -0.25284                  |
| 16                 | 0.000782           | 0.00011          | 0.303761                  |
| 17                 | 0.000796           | -0.00094         | -2.60168                  |
| 18                 | 0.000679           | 0.000549         | 1.517814                  |
| 19                 | 0.000576           | 0.000518         | 1.432731                  |
| 20                 | 0.00051            | 0.000179         | 0.495324                  |
| 21                 | 0.000518           | -0.0006          | -1.66807                  |

307.2 °C

| run     | $k$ (sec <sup>-1</sup> ) |
|---------|--------------------------|
| 1       | 1.0(1)x10 <sup>-3</sup>  |
| 2       | 1.04(5)x10 <sup>-3</sup> |
| average | 1.0(1)x10 <sup>-3</sup>  |

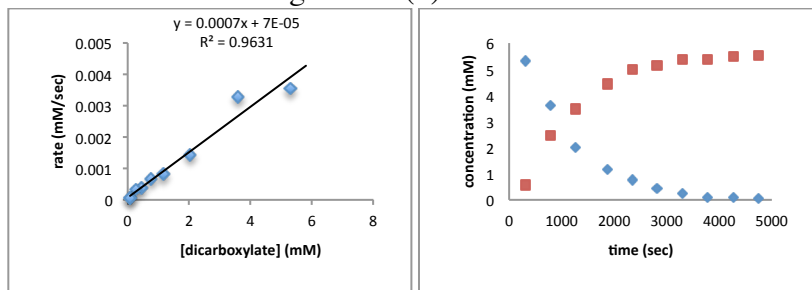

1<sup>st</sup> run:

SUMMARY OUTPUT

| Regression Statistics |          |
|-----------------------|----------|
| Multiple R            | 0.894967 |
| R Square              | 0.800965 |
| Adjusted R            | 0.789257 |
| Standard E            | 0.000638 |
| Observations          | 19       |

| ANOVA     |    |          |          |          |                |
|-----------|----|----------|----------|----------|----------------|
|           | df | SS       | MS       | F        | Significance F |
| Regressor | 1  | 2.78E-05 | 2.78E-05 | 68.41227 | 2.31E-07       |
| Residual  | 17 | 6.91E-06 | 4.07E-07 |          |                |
| Total     | 18 | 3.47E-05 |          |          |                |

|            | Coefficient | Standard Error | t Stat   | P-value  | Lower 95% | Upper 95% | Lower 90% | Upper 90% |
|------------|-------------|----------------|----------|----------|-----------|-----------|-----------|-----------|
| Intercept  | 0.005594    | 0.000473       | 11.82331 | 1.26E-09 | 0.004595  | 0.006592  | 0.004771  | 0.006417  |
| X Variable | -0.00101    | 0.000122       | -8.27117 | 2.31E-07 | -0.00126  | -0.00075  | -0.00122  | -0.00079  |

RESIDUAL OUTPUT

| Observation | Predicted Y | Residuals | Standard Residuals |
|-------------|-------------|-----------|--------------------|
| 1           | 0.004423    | 0.000536  | 0.864541           |
| 2           | 0.004012    | -0.0006   | -0.97226           |
| 3           | 0.003489    | 0.000843  | 1.3602             |
| 4           | 0.003139    | -0.00024  | -0.38005           |
| 5           | 0.002779    | 0.0002    | 0.322662           |
| 6           | 0.002641    | -0.00149  | -2.40222           |
| 7           | 0.002367    | -0.0001   | -0.16569           |
| 8           | 0.002098    | 0.000136  | 0.218917           |
| 9           | 0.001819    | 0.000494  | 0.797502           |
| 10          | 0.001428    | 0.000192  | 0.310553           |
| 11          | 0.001275    | -4.6E-06  | -0.00741           |
| 12          | 0.001134    | 3.7E-05   | 0.059721           |
| 13          | 0.001064    | -0.00048  | -0.78139           |
| 14          | 0.000904    | 0.000422  | 0.681398           |
| 15          | 0.000708    | 0.000915  | 1.476529           |
| 16          | 0.000587    | 0.000418  | 0.675122           |
| 17          | 0.000637    | -0.00106  | -1.70519           |
| 18          | 0.000535    | 0.000317  | 0.51117            |
| 19          | 0.000535    | -0.00054  | -0.86412           |

2<sup>nd</sup> run:

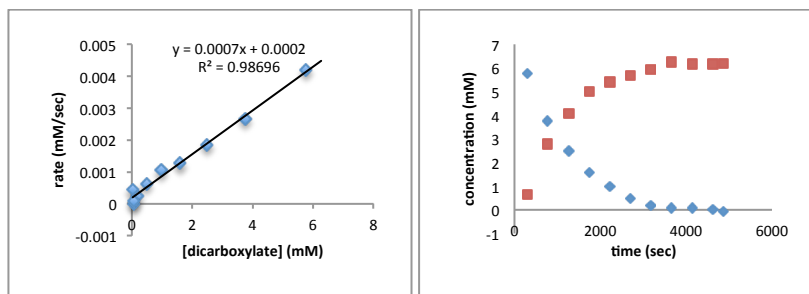

SUMMARY OUTPUT

| <u>Regression Statistics</u> |          |
|------------------------------|----------|
| Multiple R                   | 0.990229 |
| R Square                     | 0.980552 |
| Adjusted R                   | 0.977774 |
| Standard E                   | 0.000206 |
| Observations                 | 9        |

| <u>ANOVA</u> |           |           |           |          |                       |
|--------------|-----------|-----------|-----------|----------|-----------------------|
|              | <i>df</i> | <i>SS</i> | <i>MS</i> | <i>F</i> | <i>Significance F</i> |
| Regression   | 1         | 1.5E-05   | 1.5E-05   | 352.9432 | 3.01E-07              |
| Residual     | 7         | 2.98E-07  | 4.25E-08  |          |                       |
| Total        | 8         | 1.53E-05  |           |          |                       |

|            | <i>Coefficient</i> | <i>Standard Error</i> | <i>t Stat</i> | <i>P-value</i> | <i>Lower 95%</i> | <i>Upper 95%</i> | <i>Lower 90.0%</i> | <i>Upper 90.0%</i> |
|------------|--------------------|-----------------------|---------------|----------------|------------------|------------------|--------------------|--------------------|
| Intercept  | 0.000209           | 9.1E-05               | 2.302708      | 0.054772       | -5.6E-06         | 0.000425         | 3.71E-05           | 0.000382           |
| X Variable | 0.001045           | 5.56E-05              | 18.78678      | 3.01E-07       | 0.000913         | 0.001176         | 0.000939           | 0.00115            |

RESIDUAL OUTPUT

| <i>Observation</i> | <i>Predicted Y</i> | <i>Residuals</i> | <i>Standard Residuals</i> |
|--------------------|--------------------|------------------|---------------------------|
| 1                  | 0.004136           | 5.56E-05         | 0.288279                  |
| 2                  | 0.002805           | -0.00015         | -0.78301                  |
| 3                  | 0.001877           | -2.7E-05         | -0.14119                  |
| 4                  | 0.00124            | 3.09E-05         | 0.160118                  |
| 5                  | 0.000712           | 0.000341         | 1.76552                   |
| 6                  | 0.0004             | 0.000222         | 1.151764                  |
| 7                  | 0.000278           | -3.3E-05         | -0.17262                  |
| 8                  | 0.000279           | -0.00028         | -1.45919                  |
| 9                  | 0.000238           | -0.00016         | -0.80967                  |

### 312.1 K

| run     | $k$ (sec <sup>-1</sup> ) |
|---------|--------------------------|
| 1       | 1.9(1)x10 <sup>-3</sup>  |
| 2       | 1.6(1)x10 <sup>-3</sup>  |
| 3       | 1.4(1)x10 <sup>-3</sup>  |
| average | 1.6(1)x10 <sup>-3</sup>  |

1<sup>st</sup> run:

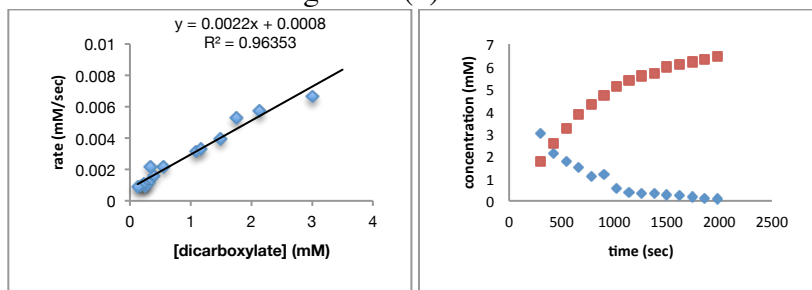

#### SUMMARY OUTPUT

##### Regression Statistics

Multiple R 0.974511  
 R Square 0.949672  
 Adjusted R 0.944639  
 Standard E 0.000441  
 Observatic 12

##### ANOVA

|           | df | SS       | MS       | F        | ignificance F |
|-----------|----|----------|----------|----------|---------------|
| Regressor | 1  | 3.68E-05 | 3.68E-05 | 188.6961 | 8.12E-08      |
| Residual  | 10 | 1.95E-06 | 1.95E-07 |          |               |
| Total     | 11 | 3.87E-05 |          |          |               |

|            | Coefficient | Standard Err | t Stat   | P-value  | Lower 95% | Upper 95% | Lower 90.0% | Upper 90.0% |
|------------|-------------|--------------|----------|----------|-----------|-----------|-------------|-------------|
| Intercept  | 0.013403    | 0.000887     | 15.11595 | 3.25E-08 | 0.011427  | 0.015378  | 0.011796    | 0.01501     |
| X Variable | -0.00185    | 0.000135     | -13.7367 | 8.12E-08 | -0.00215  | -0.00155  | -0.0021     | -0.00161    |

#### RESIDUAL OUTPUT

##### Observation Predicted y Residuals Standard Residuals

|    |          |          |          |
|----|----------|----------|----------|
| 1  | 0.005862 | 6.86E-05 | 0.162916 |
| 2  | 0.003819 | -0.00014 | -0.33152 |
| 3  | 0.002456 | -2.7E-06 | -0.00651 |
| 4  | 0.001398 | 0.000506 | 1.202467 |
| 5  | 0.000948 | -0.00014 | -0.32715 |
| 6  | 0.000744 | -0.00038 | -0.89333 |
| 7  | 0.000276 | 0.000567 | 1.347584 |
| 8  | -2.2E-05 | 0.000557 | 1.323592 |
| 9  | 0.000132 | -0.00041 | -0.96791 |
| 10 | 0.000333 | -0.0007  | -1.65329 |
| 11 | 8.39E-05 | 0.000365 | 0.866615 |
| 12 | 0.000163 | -0.0003  | -0.72346 |

2<sup>nd</sup> run:

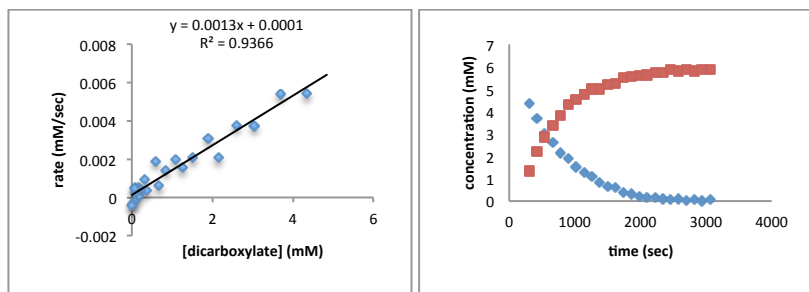

SUMMARY OUTPUT

Regression Statistics

Multiple R 0.975551  
 R Square 0.951699  
 Adjusted R 0.946869  
 Standard E 0.000446  
 Observatic 12

ANOVA

|            | <i>df</i> | <i>SS</i> | <i>MS</i> | <i>F</i> | <i>ignificance F</i> |
|------------|-----------|-----------|-----------|----------|----------------------|
| Regression | 1         | 3.92E-05  | 3.92E-05  | 197.0345 | 6.6E-08              |
| Residual   | 10        | 1.99E-06  | 1.99E-07  |          |                      |
| Total      | 11        | 4.12E-05  |           |          |                      |

|            | <i>Coefficient</i> | <i>andard Err</i> | <i>t Stat</i> | <i>P-value</i> | <i>Lower 95%</i> | <i>Upper 95%</i> | <i>ower 90.0%</i> | <i>pper 90.0%</i> |
|------------|--------------------|-------------------|---------------|----------------|------------------|------------------|-------------------|-------------------|
| Intercept  | 0.010892           | 0.000569          | 19.13469      | 3.31E-09       | 0.009624         | 0.012161         | 0.00986           | 0.011924          |
| X Variable | -0.00159           | 0.000113          | -14.0369      | 6.6E-08        | -0.00185         | -0.00134         | -0.0018           | -0.00139          |

RESIDUAL OUTPUT

Observation Predicted  $\hat{y}$  Residuals ard Residuals

|    |          |          |          |
|----|----------|----------|----------|
| 1  | 0.006856 | -0.00021 | -0.48218 |
| 2  | 0.005762 | -4E-05   | -0.09412 |
| 3  | 0.004755 | 0.000513 | 1.206718 |
| 4  | 0.003994 | -1.1E-05 | -0.02511 |
| 5  | 0.003389 | -0.00022 | -0.5211  |
| 6  | 0.002757 | 0.000549 | 1.291723 |
| 7  | 0.002343 | -0.00018 | -0.41815 |
| 8  | 0.002034 | -0.00042 | -0.98081 |
| 9  | 0.001812 | -0.00065 | -1.5226  |
| 10 | 0.001394 | 0.00079  | 1.856794 |
| 11 | 0.001212 | -0.00026 | -0.60864 |
| 12 | 0.000997 | 0.000126 | 0.297471 |



3<sup>rd</sup> run:

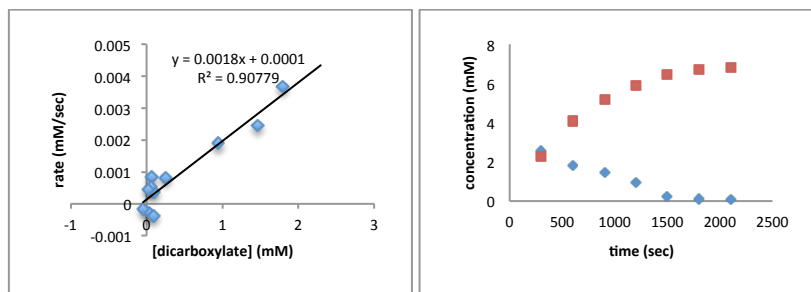

SUMMARY OUTPUT

| <u>Regression Statistics</u> |          |
|------------------------------|----------|
| Multiple R                   | 0.95171  |
| R Square                     | 0.905752 |
| Adjusted R                   | 0.899469 |
| Standard E                   | 0.000533 |
| Observations                 | 17       |

| <u>ANOVA</u> |           |           |           |          |                       |
|--------------|-----------|-----------|-----------|----------|-----------------------|
|              | <i>df</i> | <i>SS</i> | <i>MS</i> | <i>F</i> | <i>Significance F</i> |
| Regression   | 1         | 4.1E-05   | 4.1E-05   | 144.1547 | 4.29E-09              |
| Residual     | 15        | 4.26E-06  | 2.84E-07  |          |                       |
| Total        | 16        | 4.52E-05  |           |          |                       |

|            | <i>Coefficient</i> | <i>Standard Error</i> | <i>t Stat</i> | <i>P-value</i> | <i>Lower 95%</i> | <i>Upper 95%</i> | <i>Lower 90.0%</i> | <i>Upper 90.0%</i> |
|------------|--------------------|-----------------------|---------------|----------------|------------------|------------------|--------------------|--------------------|
| Intercept  | 0.000325           | 0.000195              | 1.667081      | 0.116236       | -9.1E-05         | 0.000742         | -1.7E-05           | 0.000668           |
| X Variable | 0.001446           | 0.00012               | 12.00644      | 4.29E-09       | 0.001189         | 0.001703         | 0.001235           | 0.001657           |

RESIDUAL OUTPUT

| <u>Observation</u> | <u>Predicted <math>\hat{y}</math></u> | <u>Residuals</u> | <u>Standard Residuals</u> |
|--------------------|---------------------------------------|------------------|---------------------------|
| 1                  | 0.005661                              | -0.00024         | -0.45612                  |
| 2                  | 0.004724                              | 0.000672         | 1.301855                  |
| 3                  | 0.004077                              | -0.00035         | -0.67551                  |
| 4                  | 0.003422                              | 0.000354         | 0.685446                  |
| 5                  | 0.003057                              | -0.00095         | -1.84208                  |
| 6                  | 0.002518                              | 0.000586         | 1.13451                   |
| 7                  | 0.002154                              | -6E-05           | -0.11545                  |
| 8                  | 0.001885                              | -0.00033         | -0.64623                  |
| 9                  | 0.001542                              | 0.000435         | 0.842984                  |
| 10                 | 0.001298                              | 0.000109         | 0.210914                  |
| 11                 | 0.001189                              | -0.00056         | -1.08521                  |
| 12                 | 0.000859                              | 0.001042         | 2.01774                   |
| 13                 | 0.000797                              | -0.00044         | -0.85503                  |
| 14                 | 0.000637                              | 0.000289         | 0.560012                  |
| 15                 | 0.000562                              | -0.00013         | -0.25432                  |
| 16                 | 0.000552                              | -0.0005          | -0.96272                  |
| 17                 | 0.00046                               | 7.19E-05         | 0.13922                   |

**322.0 K**

| run     | $k$ (sec <sup>-1</sup> ) |
|---------|--------------------------|
| 1       | 4.4(3)x10 <sup>-3</sup>  |
| 2       | 4.2(2)x10 <sup>-3</sup>  |
| average | 4.3(3)x10 <sup>-3</sup>  |

1<sup>st</sup> run:

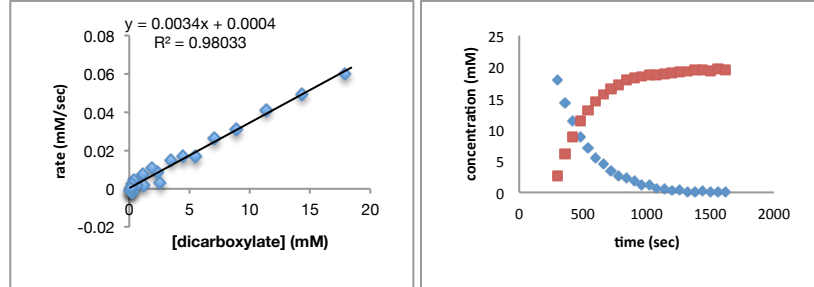

SUMMARY OUTPUT

| Regression Statistics |          |
|-----------------------|----------|
| Multiple R            | 0.959754 |
| R Square              | 0.921128 |
| Adjusted R            | 0.91587  |
| Standard E            | 0.005068 |
| Observations          | 17       |

| ANOVA      |    |          |          |          |                |
|------------|----|----------|----------|----------|----------------|
|            | df | SS       | MS       | F        | Significance F |
| Regression | 1  | 0.0045   | 0.0045   | 175.1821 | 1.12E-09       |
| Residual   | 15 | 0.000385 | 2.57E-05 |          |                |
| Total      | 16 | 0.004885 |          |          |                |

|            | Coefficient | Standard Error | t Stat   | P-value  | Lower 95% | Upper 95% | Lower 90.0% | Upper 90.0% |
|------------|-------------|----------------|----------|----------|-----------|-----------|-------------|-------------|
| Intercept  | 0.000807    | 0.001674       | 0.482261 | 0.636582 | -0.00276  | 0.004374  | -0.00213    | 0.003741    |
| X Variable | 0.0044      | 0.000332       | 13.23564 | 1.12E-09 | 0.003692  | 0.005109  | 0.003817    | 0.004983    |

RESIDUAL OUTPUT

| Observation | Predicted Y | Residuals | Standard Residuals |
|-------------|-------------|-----------|--------------------|
| 1           | 0.058318    | -0.00429  | -0.87438           |
| 2           | 0.044318    | 0.008712  | 1.775411           |
| 3           | 0.035093    | -0.00015  | -0.03089           |
| 4           | 0.028574    | -0.00388  | -0.79127           |
| 5           | 0.022832    | -0.00108  | -0.2208            |
| 6           | 0.017252    | 0.003885  | 0.791776           |
| 7           | 0.014228    | -0.00277  | -0.56526           |
| 8           | 0.011481    | -0.00107  | -0.21888           |
| 9           | 0.008092    | 0.004745  | 0.967037           |
| 10          | 0.007242    | -0.00402  | -0.81963           |
| 11          | 0.004134    | 0.007635  | 1.555911           |
| 12          | 0.005655    | -0.01142  | -2.32625           |
| 13          | 0.003754    | 0.003445  | 0.702107           |
| 14          | 0.002454    | 0.002472  | 0.503843           |
| 15          | 0.002247    | -0.00147  | -0.29874           |
| 16          | 0.002113    | -0.0016   | -0.32666           |
| 17          | 0.00149     | 0.000867  | 0.176665           |

2<sup>nd</sup> run:

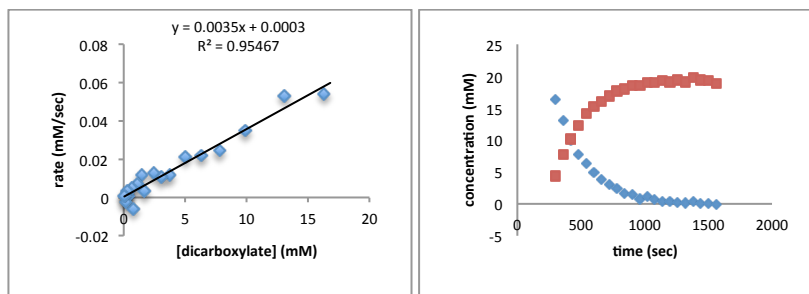

SUMMARY OUTPUT

| <u>Regression Statistics</u> |          |
|------------------------------|----------|
| Multiple R                   | 0.983535 |
| R Square                     | 0.967341 |
| Adjusted R Square            | 0.9653   |
| Standard Error               | 0.003363 |
| Observations                 | 18       |

| <u>ANOVA</u> |           |           |           |          |                       |
|--------------|-----------|-----------|-----------|----------|-----------------------|
|              | <i>df</i> | <i>SS</i> | <i>MS</i> | <i>F</i> | <i>Significance F</i> |
| Regression   | 1         | 0.005358  | 0.005358  | 473.9153 | 2.58E-13              |
| Residual     | 16        | 0.000181  | 1.13E-05  |          |                       |
| Total        | 17        | 0.005539  |           |          |                       |

|              | <u>Coefficient</u> | <u>Standard Error</u> | <u>t Stat</u> | <u>P-value</u> | <u>Lower 95%</u> | <u>Upper 95%</u> | <u>Lower 90.0%</u> | <u>Upper 90.0%</u> |
|--------------|--------------------|-----------------------|---------------|----------------|------------------|------------------|--------------------|--------------------|
| Intercept    | 0.000952           | 0.001067              | 0.892544      | 0.385329       | -0.00131         | 0.003213         | -0.00091           | 0.002814           |
| X Variable 1 | 0.004222           | 0.000194              | 21.76959      | 2.58E-13       | 0.003811         | 0.004634         | 0.003884           | 0.004561           |

RESIDUAL OUTPUT

| <u>Observation</u> | <u>Predicted Y</u> | <u>Residuals</u> | <u>Standard Residuals</u> |
|--------------------|--------------------|------------------|---------------------------|
| 1                  | 0.061439           | -0.00158         | -0.48393                  |
| 2                  | 0.048933           | 0.000429         | 0.13143                   |
| 3                  | 0.038523           | 0.00257          | 0.787705                  |
| 4                  | 0.030729           | 3.72E-05         | 0.011399                  |
| 5                  | 0.024101           | 0.002058         | 0.630883                  |
| 6                  | 0.019804           | -0.00284         | -0.87166                  |
| 7                  | 0.015554           | 0.001222         | 0.374506                  |
| 8                  | 0.011762           | 0.003207         | 0.983119                  |
| 9                  | 0.01094            | -0.00769         | -2.35855                  |
| 10                 | 0.00876            | -0.00015         | -0.04723                  |
| 11                 | 0.006039           | 0.004699         | 1.440474                  |
| 12                 | 0.0056             | -0.00387         | -1.18574                  |
| 13                 | 0.003729           | 0.003657         | 1.121089                  |
| 14                 | 0.003286           | -0.00153         | -0.47047                  |
| 15                 | 0.002188           | 0.002144         | 0.657275                  |
| 16                 | 0.002649           | -0.00447         | -1.37037                  |
| 17                 | 0.001478           | 0.003147         | 0.964567                  |
| 18                 | 0.001386           | -0.00103         | -0.31449                  |

### 326.6 K

| run     | $k$ (sec <sup>-1</sup> ) |
|---------|--------------------------|
| 1       | 1.00(6)x10 <sup>-2</sup> |
| 2       | 8.1(4)x10 <sup>-3</sup>  |
| average | 9.1(5)x10 <sup>-3</sup>  |

1<sup>st</sup> run:

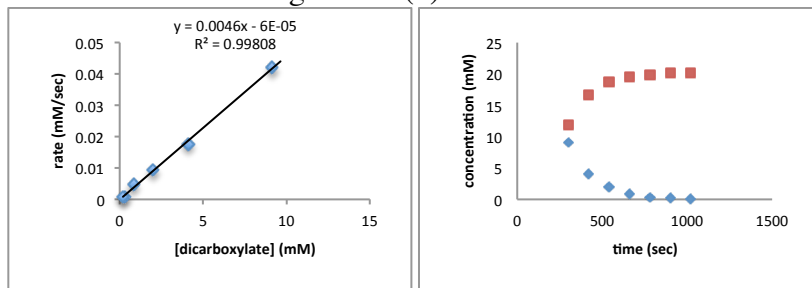

#### SUMMARY OUTPUT

| <u>Regression Statistics</u> |          |
|------------------------------|----------|
| Multiple R                   | 0.994588 |
| R Square                     | 0.989205 |
| Adjusted R                   | 0.985607 |
| Standard E                   | 0.00197  |
| Observatic                   | 5        |

| <u>ANOVA</u> |           |           |           |          |                      |
|--------------|-----------|-----------|-----------|----------|----------------------|
|              | <i>df</i> | <i>SS</i> | <i>MS</i> | <i>F</i> | <i>ignificance F</i> |
| Regressor    | 1         | 0.001067  | 0.001067  | 274.9173 | 0.000478             |
| Residual     | 3         | 1.16E-05  | 3.88E-06  |          |                      |
| Total        | 4         | 0.001078  |           |          |                      |

|            | <i>Coefficient</i> | <i>andard Err</i> | <i>t Stat</i> | <i>P-value</i> | <i>Lower 95%</i> | <i>Upper 95%</i> | <i>ower 90.0%</i> | <i>pper 90.0%</i> |
|------------|--------------------|-------------------|---------------|----------------|------------------|------------------|-------------------|-------------------|
| Intercept  | -9.9E-06           | 0.001259          | -0.00783      | 0.994247       | -0.00402         | 0.003998         | -0.00297          | 0.002954          |
| X Variable | 0.010047           | 0.000606          | 16.58063      | 0.000478       | 0.008118         | 0.011975         | 0.008621          | 0.011473          |

#### RESIDUAL OUTPUT

| <u>Observation</u> | <u>Predicted Y</u> | <u>Residuals</u> | <u>ard Residuals</u> |
|--------------------|--------------------|------------------|----------------------|
| 1                  | 0.041168           | 0.000896         | 0.525325             |
| 2                  | 0.019958           | -0.00237         | -1.3865              |
| 3                  | 0.008575           | 0.000867         | 0.508275             |
| 4                  | 0.002921           | 0.001769         | 1.036984             |
| 5                  | 0.001962           | -0.00117         | -0.68408             |

2<sup>nd</sup> run:

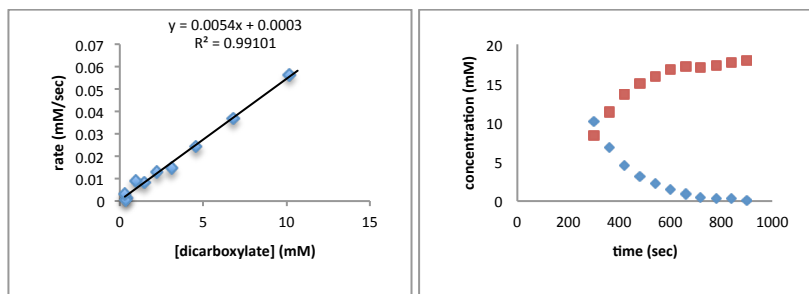

SUMMARY OUTPUT

| <u>Regression Statistics</u> |          |
|------------------------------|----------|
| Multiple R                   | 0.990135 |
| R Square                     | 0.980367 |
| Adjusted R                   | 0.977562 |
| Standard E                   | 0.002734 |
| Observations                 | 9        |

| <u>ANOVA</u> |           |           |           |          |                       |
|--------------|-----------|-----------|-----------|----------|-----------------------|
|              | <i>df</i> | <i>SS</i> | <i>MS</i> | <i>F</i> | <i>Significance F</i> |
| Regression   | 1         | 0.002614  | 0.002614  | 349.5429 | 3.11E-07              |
| Residual     | 7         | 5.23E-05  | 7.48E-06  |          |                       |
| Total        | 8         | 0.002666  |           |          |                       |

|            | <u>Coefficient</u> | <u>Standard Error</u> | <u>t Stat</u> | <u>P-value</u> | <u>Lower 95%</u> | <u>Upper 95%</u> | <u>Lower 90.0%</u> | <u>Upper 90.0%</u> |
|------------|--------------------|-----------------------|---------------|----------------|------------------|------------------|--------------------|--------------------|
| Intercept  | 0.000164           | 0.00133               | 0.123102      | 0.905486       | -0.00298         | 0.003309         | -0.00236           | 0.002684           |
| X Variable | 0.008097           | 0.000433              | 18.69607      | 3.11E-07       | 0.007073         | 0.009121         | 0.007276           | 0.008917           |

RESIDUAL OUTPUT

| <u>Observation</u> | <u>Predicted Y</u> | <u>Residuals</u> | <u>Standard Residuals</u> |
|--------------------|--------------------|------------------|---------------------------|
| 1                  | 0.055092           | 0.001303         | 0.509544                  |
| 2                  | 0.03716            | -0.00025         | -0.09607                  |
| 3                  | 0.025317           | -0.00094         | -0.36682                  |
| 4                  | 0.018212           | -0.00359         | -1.40285                  |
| 5                  | 0.01192            | 0.001033         | 0.403944                  |
| 6                  | 0.007817           | 0.000627         | 0.245196                  |
| 7                  | 0.003505           | 0.005371         | 2.099732                  |
| 8                  | 0.002845           | -0.00149         | -0.58089                  |
| 9                  | 0.002594           | -0.00208         | -0.81178                  |

## Eyring Analysis

**Table 1.** Tabulated rate data as a function of temperature (see attached Excel file for data):

| temp (K) | neg 1/T       | Rln(hk/kBT)    |
|----------|---------------|----------------|
| 326.6    | -0.0030618494 | -68.2901688827 |
| 326.6    | -0.0030618494 | -67.8613232983 |
| 322      | -0.0031055901 | -69.5557529645 |
| 322      | -0.0031055901 | -69.4737954858 |
| 312.2    | -0.0032030750 | -71.6235085262 |
| 312.2    | -0.0032030750 | -71.4321573220 |
| 312.2    | -0.0032030750 | -71.1330364216 |
| 307.2    | -0.0032552083 | -72.2376779070 |
| 307.2    | -0.0032552083 | -72.3144970478 |
| 298      | -0.0033557047 | -74.5509030726 |
| 298      | -0.0033557047 | -74.7880520115 |
| 287.3    | -0.0034806822 | -76.9156093209 |
| 287.3    | -0.0034806822 | -76.9264083158 |
| 287.3    | -0.0034806822 | -76.8924307364 |

### Linear Regression Report

Page/Date/Time 1 2/23/2014 1:51:08 PM  
 Database  
 Y = C2 X = C1

### Linear Regression Plot Section

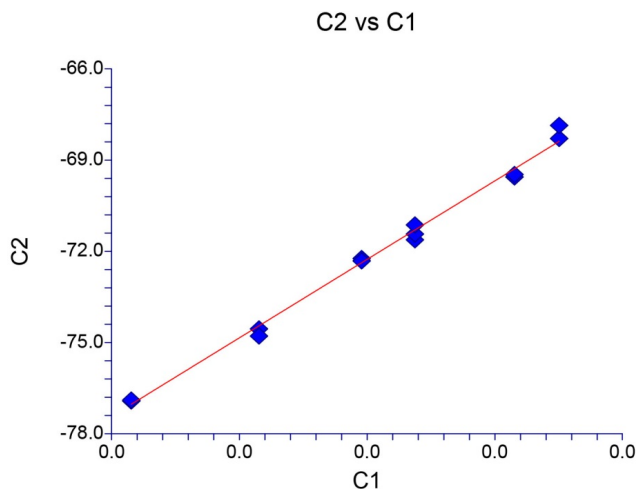

### Regression Estimation Section

| Parameter                        | Intercept<br>B(0) | Slope<br>B(1) |
|----------------------------------|-------------------|---------------|
| Regression Coefficients          | -5.181496         | 20642.318390  |
| Lower 90% Confidence Limit       | -7.796209         | 19840.506075  |
| Upper 90% Confidence Limit       | -2.566784         | 21444.130705  |
| Standard Error                   | 1.467054          | 449.878199    |
| Standardized Coefficient         | 0.000000          | 0.997162      |
| T Value                          | -3.531905         | 45.884238     |
| Prob Level (T Test)              | 0.004132          | 0.000000      |
| Reject H0 (Alpha = 0.100000)     | Yes               | Yes           |
| Power (Alpha = 0.100000)         | 0.953354          | 1.000000      |
| Regression of Y on X             | -5.181496         | 20642.318390  |
| Inverse Regression from X on Y   | -4.798208         | 20759.974008  |
| Orthogonal Regression of Y and X | -4.798208         | 20759.974008  |

### Estimated Model

$$(-5.18149623023439) + (20642.3183897598) * (C1)$$

**Figure 2.** NCSS output (part 1), including Eyring plot of data in Table 1.

**Linear Regression Report**

Page/Date/Time 2 2/23/2014 1:51:08 PM  
 Database  
 Y = C2 X = C1

**Correlation and R-Squared Section**

| Parameter                          | Pearson Correlation Coefficient | R-Squared | Spearman Rank Correlation Coefficient |
|------------------------------------|---------------------------------|-----------|---------------------------------------|
| Estimated Value                    | 0.997162                        | 0.994333  | 0.986725                              |
| Lower 90% Conf. Limit (r dist'n)   | 0.991852                        |           |                                       |
| Upper 90% Conf. Limit (r dist'n)   | 0.998797                        |           |                                       |
| Lower 90% Conf. Limit (Fisher's z) | 0.992367                        |           | 0.964605                              |
| Upper 90% Conf. Limit (Fisher's z) | 0.998947                        |           | 0.995056                              |
| Adjusted (Rbar)                    |                                 | 0.993860  |                                       |
| T-Value for H0: Rho = 0            | 45.884238                       | 45.884238 | 21.047565                             |
| Prob Level for H0: Rho = 0         | 0.000000                        | 0.000000  | 0.000000                              |

**Analysis of Variance Section**

| Source     | DF | Sum of Squares | Mean Square  | F-Ratio     | Prob Level | Power (10%) |
|------------|----|----------------|--------------|-------------|------------|-------------|
| Intercept  | 1  | 73441.89       | 73441.89     |             |            |             |
| Slope      | 1  | 127.9709       | 127.9709     | 2105.363307 | 0.000000   | 1.000000    |
| Error      | 12 | 0.7293993      | 6.078327E-02 |             |            |             |
| Adj. Total | 13 | 128.7003       | 9.900021     |             |            |             |
| Total      | 14 | 73570.59       |              |             |            |             |

s = Square Root(6.078327E-02) = 0.2465426

**Summary Matrices**

| Index       | X'X           | X'X           | X'Y       | X'X Inverse | X'X Inverse |
|-------------|---------------|---------------|-----------|-------------|-------------|
|             | 0             | 1             | 2         | 0           | 1           |
| 0           | 14            | -4.560798E-02 | -1013.995 | 35.40857    | 10847.22    |
| 1           | -4.560798E-02 | 1.48878E-04   | 3.309505  | 10847.22    | 3329705     |
| 2 (Y'Y)     |               |               | 73570.59  |             |             |
| Determinant |               | 4.204576E-06  |           |             | 237836.1    |

**Variance - Covariance Matrix of Regression Coefficients**

| Index | VC(b)    | VC(b)    |
|-------|----------|----------|
|       | 0        | 1        |
| 0     | 2.152248 | 659.3297 |
| 1     | 659.3297 | 202390.4 |

**Figure 3.** NCSS output (part 2) for Eyring plot shown in Figure 1.

## Kinetics Experiments from Complex 7d

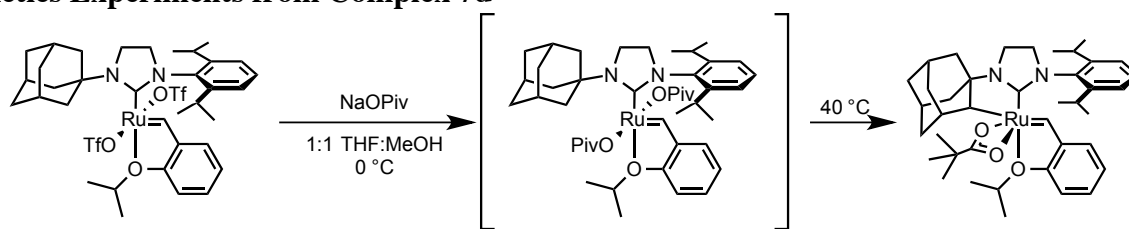

312.1 K

| run     | $k$ (sec <sup>-1</sup> ) |
|---------|--------------------------|
| 1       | 1.36(8)x10 <sup>-3</sup> |
| 2       | 1.3(3)x10 <sup>-3</sup>  |
| 3       | 1.6(2)x10 <sup>-3</sup>  |
| average | 1.4(2)x10 <sup>-3</sup>  |

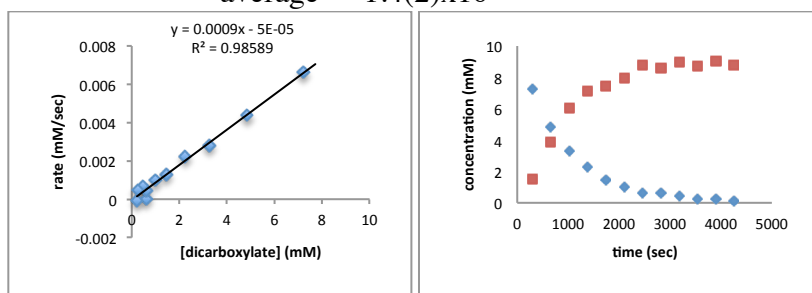

1<sup>st</sup> run:

### Linear Regression

#### Regression Statistics

|                                                                |         |
|----------------------------------------------------------------|---------|
| R                                                              | 0.98413 |
| R Square                                                       | 0.96852 |
| Adjusted R Square                                              | 0.96502 |
| S                                                              | 0.00039 |
| Total number of observations                                   | 11      |
| <b>0.01524042644447 = - 0.0001 + 0.0014 * 7.22025185495953</b> |         |

#### ANOVA

|            | d.f. | SS      | MS      | F         | p-level |
|------------|------|---------|---------|-----------|---------|
| Regression | 1.   | 0.00004 | 0.00004 | 276.90811 | 0.      |
| Residual   | 9.   | 0.      | 0.      |           |         |
| Total      | 10.  | 0.00004 |         |           |         |

|                         | Coefficients | Standard Error | LCL      | UCL     | t Stat   |
|-------------------------|--------------|----------------|----------|---------|----------|
| Intercept               | -0.00006     | 0.00016        | -0.00036 | 0.00024 | -0.38187 |
| <b>7.22025185495953</b> | 0.00136      | 0.00008        | 0.00121  | 0.00151 | 16.64056 |

T (10%) 1.83311  
 LCL - Lower value of a reliable interval (LCL)  
 UCL - Upper value of a reliable interval (UCL)

#### Residuals

| Observation | Predicted Y | Residual | Standard Residuals |
|-------------|-------------|----------|--------------------|
| 1           | 0.00653     | 0.00009  | 0.25217            |
| 2           | 0.00438     | 0.       | -0.00669           |
| 3           | 0.003       | -0.0002  | -0.53734           |
| 4           | 0.00192     | 0.00029  | 0.78446            |
| 5           | 0.0013      | -0.00003 | -0.06913           |
| 6           | 0.0008      | 0.0002   | 0.53547            |
| 7           | 0.0008      | -0.0008  | -2.16074           |
| 8           | 0.00058     | -0.00013 | -0.34113           |
| 9           | 0.00024     | 0.00046  | 1.2561             |
| 10          | 0.00027     | -0.00035 | -0.93749           |
| 11          | 0.00003     | 0.00045  | 1.22431            |



2<sup>nd</sup> run:

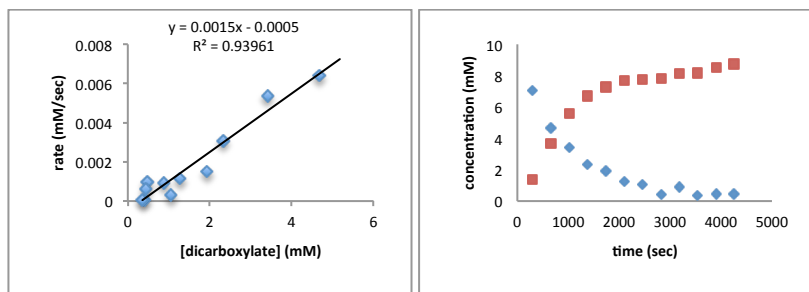

**Linear Regression**

**Regression Statistics**

|                              |         |
|------------------------------|---------|
| R                            | 0.86152 |
| R Square                     | 0.74222 |
| Adjusted R Square            | 0.71358 |
| S                            | 0.00115 |
| Total number of observations | 11      |

**0.01580850735852 = - 0.0004 + 0.0013 \* 7.04954354034568**

**ANOVA**

|            | d.f. | SS      | MS      | F        | p-level |
|------------|------|---------|---------|----------|---------|
| Regression | 1.   | 0.00003 | 0.00003 | 25.91416 | 0.00065 |
| Residual   | 9.   | 0.00001 | 0.      |          |         |
| Total      | 10.  | 0.00005 |         |          |         |

|                         | Coefficients | Standard Error | LCL      | UCL     | t Stat   |
|-------------------------|--------------|----------------|----------|---------|----------|
| <b>Intercept</b>        | -0.0004      | 0.00053        | -0.00137 | 0.00058 | -0.74131 |
| <b>7.04954354034568</b> | 0.00132      | 0.00026        | 0.00084  | 0.00179 | 5.0906   |
| T (10%)                 | 1.83311      |                |          |         |          |

LCL - Lower value of a reliable interval (LCL)  
 UCL - Upper value of a reliable interval (UCL)

**Residuals**

| Observation | Predicted Y | Residual | Standard Residuals |
|-------------|-------------|----------|--------------------|
| 1           | 0.00576     | 0.00083  | 0.75918            |
| 2           | 0.00409     | -0.00057 | -0.52114           |
| 3           | 0.00267     | 0.00033  | 0.30149            |
| 4           | 0.00215     | -0.00104 | -0.95227           |
| 5           | 0.00129     | 0.00052  | 0.47886            |
| 6           | 0.00099     | -0.00035 | -0.3198            |
| 7           | 0.00014     | 0.00164  | 1.49912            |
| 8           | 0.00077     | -0.0021  | -1.91764           |
| 9           | 0.00007     | 0.0014   | 1.27993            |
| 10          | 0.00022     | -0.00054 | -0.49773           |
| 11          | 0.00019     | -0.00012 | -0.11              |

3<sup>rd</sup> run:

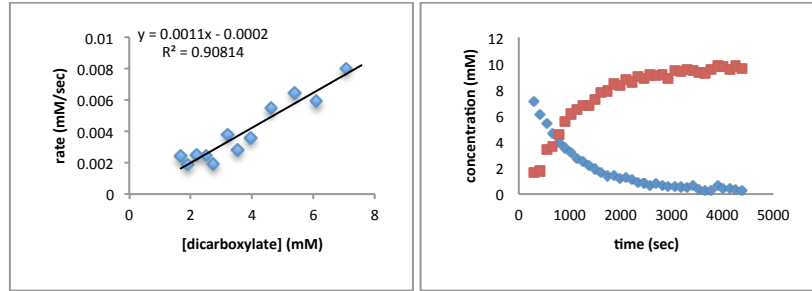

**Linear Regression**

**Regression Statistics**

|                              |         |
|------------------------------|---------|
| R                            | 0.88703 |
| R Square                     | 0.78683 |
| Adjusted R Square            | 0.78037 |
| S                            | 0.00154 |
| Total number of observations | 35      |

**-- 0.0008 + 0.0016 \* 11.8**

**ANOVA**

|            | d.f. | SS      | MS      | F         | p-level     |
|------------|------|---------|---------|-----------|-------------|
| Regression | 1.   | 0.00029 | 0.00029 | 121.80636 | 1.29452E-12 |
| Residual   | 33.  | 0.00008 | 0.      |           |             |
| Total      | 34.  | 0.00037 |         |           |             |

|                  | Coefficients | Standard Error | LCL     | UCL      | t Stat   |
|------------------|--------------|----------------|---------|----------|----------|
| <b>Intercept</b> | -0.00078     | 0.00037        | -0.0014 | -0.00016 | -2.14262 |
| <b>11.8</b>      | 0.00163      | 0.00015        | 0.00138 | 0.00188  | 11.03659 |

T (10%) 1.69236  
 LCL - Lower value of a reliable interval (LCL)  
 UCL - Upper value of a reliable interval (UCL)

**Residuals**

| Observation | Predicted Y | Residual | Standard Residuals |
|-------------|-------------|----------|--------------------|
| 1           | 0.01074     | 0.00502  | 3.30856            |
| 2           | 0.00917     | -0.00116 | -0.762             |
| 3           | 0.00801     | -0.0021  | -1.38359           |
| 4           | 0.00675     | -0.00028 | -0.1846            |
| 5           | 0.00567     | -0.00019 | -0.12816           |
| 6           | 0.00497     | -0.00138 | -0.90924           |
| 7           | 0.00442     | -0.00162 | -1.06649           |
| 8           | 0.00368     | 0.00012  | 0.07857            |
| 9           | 0.0033      | -0.00135 | -0.89121           |
| 10          | 0.00281     | -0.00034 | -0.22667           |
| 11          | 0.00232     | 0.00018  | 0.11815            |
| 12          | 0.00196     | -0.00008 | -0.05087           |
| 13          | 0.00148     | 0.00092  | 0.60905            |
| 14          | 0.00151     | -0.00164 | -1.0821            |
| 15          | 0.00112     | 0.00086  | 0.56584            |
| 16          | 0.0013      | -0.00218 | -1.43878           |
| 17          | 0.00104     | 0.00024  | 0.15784            |
| 18          | 0.00063     | 0.00149  | 0.98149            |
| 19          | 0.0006      | -0.00045 | -0.29853           |
| 20          | 0.0003      | 0.00124  | 0.8161             |
| 21          | 0.00051     | -0.00161 | -1.06212           |
| 22          | 0.00029     | 0.00083  | 0.54543            |
| 23          | 0.00016     | 0.00051  | 0.3385             |
| 24          | 0.00017     | -0.00019 | -0.12718           |
| 25          | 0.0001      | 0.00027  | 0.17814            |
| 26          | 0.          | 0.00047  | 0.30985            |
| 27          | 0.00028     | -0.00167 | -1.0997            |
| 28          | -0.00021    | 0.00272  | 1.78836            |
| 29          | -0.00031    | 0.0008   | 0.52475            |
| 30          | -0.00028    | 0.00012  | 0.07708            |
| 31          | 0.00024     | -0.00288 | -1.89596           |
| 32          | -0.00013    | 0.002    | 1.31554            |

## Hammett Study of Carboxylate Complexes 8a-e

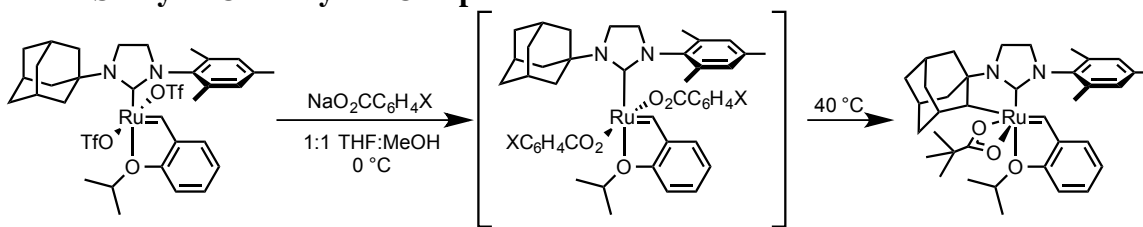

**X = OMe (8e)**

| run     | $k$ (sec <sup>-1</sup> ) |
|---------|--------------------------|
| 1       | 2.0(2) $\times 10^{-3}$  |
| 2       | 1.9(3) $\times 10^{-3}$  |
| 3       | 1.9(4) $\times 10^{-3}$  |
| average | 1.9(3) $\times 10^{-3}$  |

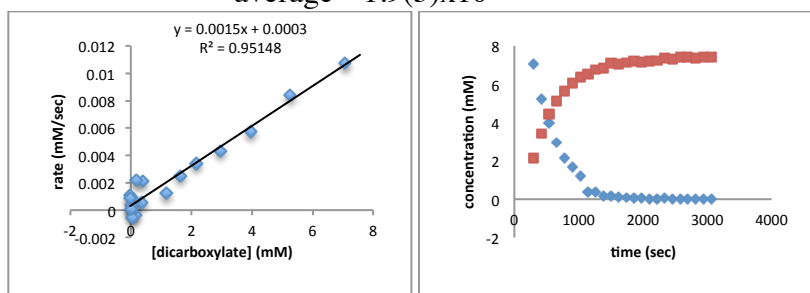

1<sup>st</sup> run:

| Linear Regression                                                                                           |              |                |                    |          |           |
|-------------------------------------------------------------------------------------------------------------|--------------|----------------|--------------------|----------|-----------|
| <b>Regression Statistics</b>                                                                                |              |                |                    |          |           |
| R                                                                                                           | 0.91263      |                |                    |          |           |
| R Square                                                                                                    | 0.8329       |                |                    |          |           |
| Adjusted R Square                                                                                           | 0.8253       |                |                    |          |           |
| S                                                                                                           | 0.00128      |                |                    |          |           |
| Total number of observations                                                                                | 24           |                |                    |          |           |
| <b>= 0.0152 - 0.0020 * 0</b>                                                                                |              |                |                    |          |           |
| <b>ANOVA</b>                                                                                                |              |                |                    |          |           |
|                                                                                                             | d.f.         | SS             | MS                 | F        | p-level   |
| Regression                                                                                                  | 1.           | 0.00018        | 0.00018            | 109.6559 | 0.        |
| Residual                                                                                                    | 22.          | 0.00004        | 0.                 |          |           |
| Total                                                                                                       | 23.          | 0.00021        |                    |          |           |
| <b>Coefficients</b>                                                                                         |              |                |                    |          |           |
|                                                                                                             | Coefficients | Standard Error | LCL                | UCL      | t Stat    |
| Intercept                                                                                                   | 0.01515      | 0.00127        | 0.01297            | 0.01734  | 11.92069  |
| 0                                                                                                           | -0.00201     | 0.00019        | -0.00234           | -0.00168 | -10.47167 |
| T (10%)<br>LCL - Lower value of a reliable interval (LCL)<br>UCL - Upper value of a reliable interval (UCL) |              |                |                    |          |           |
| <b>Residuals</b>                                                                                            |              |                |                    |          |           |
| Observation                                                                                                 | Predicted Y  | Residual       | Standard Residuals |          |           |
| 1                                                                                                           | 0.01083      | -0.00368       | -2.94769           |          |           |
| 2                                                                                                           | 0.00823      | 0.00254        | 2.03481            |          |           |
| 3                                                                                                           | 0.00619      | 0.00223        | 1.78939            |          |           |
| 4                                                                                                           | 0.0048       | 0.00094        | 0.74929            |          |           |
| 5                                                                                                           | 0.00375      | 0.0006         | 0.47811            |          |           |
| 6                                                                                                           | 0.00293      | 0.00049        | 0.38964            |          |           |
| 7                                                                                                           | 0.00232      | 0.0002         | 0.16098            |          |           |
| 8                                                                                                           | 0.00202      | -0.00079       | -0.63175           |          |           |
| 9                                                                                                           | 0.0015       | 0.00065        | 0.52322            |          |           |
| 10                                                                                                          | 0.00137      | -0.00085       | -0.68432           |          |           |
| 11                                                                                                          | 0.00085      | 0.00131        | 1.04789            |          |           |
| 12                                                                                                          | 0.00094      | -0.00128       | -1.02537           |          |           |
| 13                                                                                                          | 0.00077      | -0.00008       | -0.06459           |          |           |
| 14                                                                                                          | 0.00067      | -0.00028       | -0.22603           |          |           |
| 15                                                                                                          | 0.0007       | -0.00082       | -0.65776           |          |           |
| 16                                                                                                          | 0.00066      | -0.00049       | -0.39254           |          |           |
| 17                                                                                                          | 0.00058      | -0.00023       | -0.18703           |          |           |
| 18                                                                                                          | 0.00031      | 0.00079        | 0.6356             |          |           |
| 19                                                                                                          | 0.00044      | -0.00098       | -0.78701           |          |           |
| 20                                                                                                          | 0.00023      | 0.00066        | 0.53244            |          |           |
| 21                                                                                                          | 0.0002       | -0.00011       | -0.08513           |          |           |
| 22                                                                                                          | 0.00031      | -0.00073       | -0.58658           |          |           |
| 23                                                                                                          | 0.00015      | 0.0005         | 0.3991             |          |           |
| 24                                                                                                          | 0.00023      | -0.00058       | -0.46468           |          |           |

2<sup>nd</sup> run:

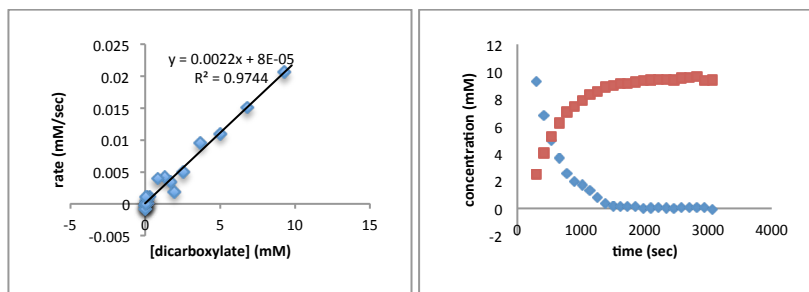

**Linear Regression**

**Regression Statistics**

|                              |         |
|------------------------------|---------|
| R                            | 0.82597 |
| R Square                     | 0.68223 |
| Adjusted R Square            | 0.66779 |
| S                            | 0.00319 |
| Total number of observations | 24      |

**= 0.0009 + 0.0019 \* 11.8**

**ANOVA**

|            | d.f. | SS      | MS      | F        | p-level |
|------------|------|---------|---------|----------|---------|
| Regression | 1.   | 0.00048 | 0.00048 | 47.23333 | 0.      |
| Residual   | 22.  | 0.00022 | 0.00001 |          |         |
| Total      | 23.  | 0.0007  |         |          |         |

|                  | Coefficients | Standard Error | LCL      | UCL     | t Stat  |
|------------------|--------------|----------------|----------|---------|---------|
| <b>Intercept</b> | 0.00093      | 0.00076        | -0.00037 | 0.00223 | 1.22656 |
| <b>11.8</b>      | 0.00186      | 0.00027        | 0.0014   | 0.00233 | 6.87265 |

T (10%) 1.71714  
 LCL - Lower value of a reliable interval (LCL)  
 UCL - Upper value of a reliable interval (UCL)

**Residuals**

| Observation | Predicted Y | Residual | Standard Residuals |
|-------------|-------------|----------|--------------------|
| 1           | 0.01824     | -0.00988 | -3.17114           |
| 2           | 0.01362     | 0.00703  | 2.25706            |
| 3           | 0.01025     | 0.00483  | 1.55053            |
| 4           | 0.00779     | 0.0032   | 1.02686            |
| 5           | 0.00567     | 0.00383  | 1.22857            |
| 6           | 0.00456     | 0.00039  | 0.12424            |
| 7           | 0.00415     | -0.00232 | -0.74519           |
| 8           | 0.00337     | 0.00013  | 0.04211            |
| 9           | 0.00244     | 0.00171  | 0.54868            |
| 10          | 0.00155     | 0.00242  | 0.77569            |
| 11          | 0.00128     | -0.00009 | -0.02899           |
| 12          | 0.00116     | -0.00059 | -0.18868           |
| 13          | 0.00116     | -0.00115 | -0.36965           |
| 14          | 0.00115     | -0.00114 | -0.36673           |
| 15          | 0.00093     | 0.00009  | 0.02747            |
| 16          | 0.00098     | -0.00123 | -0.39347           |
| 17          | 0.00104     | -0.00131 | -0.42117           |
| 18          | 0.00102     | -0.00095 | -0.30353           |
| 19          | 0.00092     | -0.00043 | -0.13778           |
| 20          | 0.00109     | -0.00185 | -0.59295           |
| 21          | 0.00104     | -0.00086 | -0.27513           |
| 22          | 0.00103     | -0.00097 | -0.31187           |
| 23          | 0.00104     | -0.0011  | -0.35234           |
| 24          | 0.00081     | 0.00024  | 0.07741            |

3<sup>rd</sup> run:

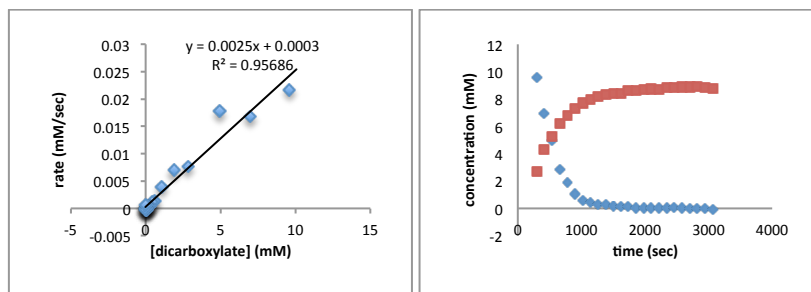

**Linear Regression**

**Regression Statistics**

|                              |         |
|------------------------------|---------|
| R                            | 0.75258 |
| R Square                     | 0.56637 |
| Adjusted R Square            | 0.54666 |
| S                            | 0.00428 |
| Total number of observations | 24      |

**= 0.0013 + 0.0019 \* 11.8**

**ANOVA**

|            | d.f. | SS      | MS      | F        | p-level |
|------------|------|---------|---------|----------|---------|
| Regression | 1.   | 0.00053 | 0.00053 | 28.73478 | 0.00002 |
| Residual   | 22.  | 0.0004  | 0.00002 |          |         |
| Total      | 23.  | 0.00093 |         |          |         |

|                  | Coefficients | Standard Error | LCL      | UCL     | t Stat  |
|------------------|--------------|----------------|----------|---------|---------|
| <b>Intercept</b> | 0.0013       | 0.00098        | -0.00038 | 0.00298 | 1.33257 |
| <b>11.8</b>      | 0.00192      | 0.00036        | 0.00131  | 0.00254 | 5.36048 |

T (10%) 1.71714  
 LCL - Lower value of a reliable interval (LCL)  
 UCL - Upper value of a reliable interval (UCL)

**Residuals**

| Observation | Predicted Y | Residual | Standard Residuals |
|-------------|-------------|----------|--------------------|
| 1           | 0.01971     | -0.01229 | -2.93885           |
| 2           | 0.0147      | 0.00703  | 1.68016            |
| 3           | 0.01082     | 0.00599  | 1.43122            |
| 4           | 0.00674     | 0.01095  | 2.61836            |
| 5           | 0.00498     | 0.00265  | 0.6336             |
| 6           | 0.00337     | 0.00357  | 0.85419            |
| 7           | 0.00247     | 0.00144  | 0.34494            |
| 8           | 0.00216     | -0.00079 | -0.18982           |
| 9           | 0.00188     | -0.00067 | -0.15951           |
| 10          | 0.00177     | -0.00131 | -0.3122            |
| 11          | 0.00163     | -0.00105 | -0.24996           |
| 12          | 0.00151     | -0.00097 | -0.23214           |
| 13          | 0.00151     | -0.00151 | -0.3605            |
| 14          | 0.0014      | -0.00093 | -0.22311           |
| 15          | 0.00134     | -0.00105 | -0.25189           |
| 16          | 0.0014      | -0.00168 | -0.40261           |
| 17          | 0.00132     | -0.00095 | -0.22793           |
| 18          | 0.00138     | -0.00168 | -0.40099           |
| 19          | 0.00146     | -0.00176 | -0.4215            |
| 20          | 0.00133     | -0.00077 | -0.18471           |
| 21          | 0.0013      | -0.00117 | -0.28042           |
| 22          | 0.00127     | -0.00114 | -0.27286           |
| 23          | 0.0013      | -0.00142 | -0.33833           |
| 24          | 0.00114     | -0.00048 | -0.11513           |

### X = Me (8d)

| run     | $k$ (sec <sup>-1</sup> ) |
|---------|--------------------------|
| 1       | 1.6(2)x10 <sup>-3</sup>  |
| 2       | 1.24(5)x10 <sup>-3</sup> |
| 3       | 1.45(9)x10 <sup>-3</sup> |
| average | 1.4(1)x10 <sup>-3</sup>  |

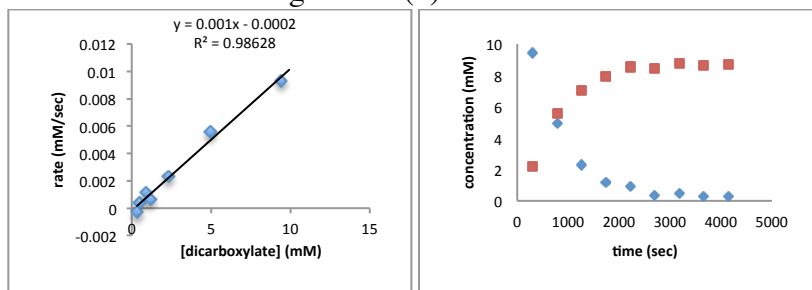

1<sup>st</sup> run:

| Linear Regression                                              |                     |                       |                           |                |                |  |
|----------------------------------------------------------------|---------------------|-----------------------|---------------------------|----------------|----------------|--|
| <b>Regression Statistics</b>                                   |                     |                       |                           |                |                |  |
| <i>R</i>                                                       | 0.85126             |                       |                           |                |                |  |
| <i>R Square</i>                                                | 0.72464             |                       |                           |                |                |  |
| <i>Adjusted R Square</i>                                       | 0.71515             |                       |                           |                |                |  |
| <i>S</i>                                                       | 0.00202             |                       |                           |                |                |  |
| Total number of observations                                   | 31                  |                       |                           |                |                |  |
| <b>0.00792019092161 = - 0.0002 + 0.0016 * 9.41998262884835</b> |                     |                       |                           |                |                |  |
| <b>ANOVA</b>                                                   |                     |                       |                           |                |                |  |
|                                                                | <i>d.f.</i>         | <i>SS</i>             | <i>MS</i>                 | <i>F</i>       | <i>p-level</i> |  |
| Regression                                                     | 1.                  | 0.00031               | 0.00031                   | 76.31823       | 0.             |  |
| Residual                                                       | 29.                 | 0.00012               | 0.                        |                |                |  |
| Total                                                          | 30.                 | 0.00043               |                           |                |                |  |
|                                                                | <i>Coefficients</i> | <i>Standard Error</i> | <i>LCL</i>                | <i>UCL</i>     | <i>t Stat</i>  |  |
| Intercept                                                      | -0.00017            | 0.00048               | -0.00098                  | 0.00064        | -0.35707       |  |
| <b>9.41998262884835</b>                                        | <b>0.00158</b>      | <b>0.00018</b>        | <b>0.00127</b>            | <b>0.00188</b> | <b>8.73603</b> |  |
| <i>T</i> (10%)                                                 | 1.69913             |                       |                           |                |                |  |
| <i>LCL</i> - Lower value of a reliable interval ( <i>LCL</i> ) |                     |                       |                           |                |                |  |
| <i>UCL</i> - Upper value of a reliable interval ( <i>UCL</i> ) |                     |                       |                           |                |                |  |
| <b>Residuals</b>                                               |                     |                       |                           |                |                |  |
| <i>Observation</i>                                             | <i>Predicted Y</i>  | <i>Residual</i>       | <i>Standard Residuals</i> |                |                |  |
| 1                                                              | 0.01183             | 0.00329               | 1.65485                   |                |                |  |
| 2                                                              | 0.00997             | -0.00015              | -0.07706                  |                |                |  |
| 3                                                              | 0.00868             | -0.00189              | -0.9487                   |                |                |  |
| 4                                                              | 0.00765             | -0.0022               | -1.10488                  |                |                |  |
| 5                                                              | 0.00648             | -0.00028              | -0.14236                  |                |                |  |
| 6                                                              | 0.00512             | 0.00208               | 1.04557                   |                |                |  |
| 7                                                              | 0.00406             | 0.00151               | 0.7587                    |                |                |  |
| 8                                                              | 0.00346             | -0.00031              | -0.15828                  |                |                |  |
| 9                                                              | 0.00344             | -0.00333              | -1.67282                  |                |                |  |
| 10                                                             | 0.00245             | 0.00278               | 1.39817                   |                |                |  |
| 11                                                             | 0.00235             | -0.00179              | -0.90263                  |                |                |  |
| 12                                                             | 0.0017              | 0.00169               | 0.85161                   |                |                |  |
| 13                                                             | 0.00183             | -0.00251              | -1.26246                  |                |                |  |
| 14                                                             | 0.00147             | 0.00044               | 0.21933                   |                |                |  |
| 15                                                             | 0.00184             | -0.00378              | -1.89943                  |                |                |  |
| 16                                                             | 0.00123             | 0.002                 | 1.00681                   |                |                |  |
| 17                                                             | 0.00136             | -0.00204              | -1.02486                  |                |                |  |
| 18                                                             | 0.00084             | 0.00186               | 0.93776                   |                |                |  |
| 19                                                             | 0.00033             | 0.0024                | 1.20646                   |                |                |  |
| 20                                                             | 0.00036             | -0.00055              | -0.27703                  |                |                |  |
| 21                                                             | 0.0005              | -0.00122              | -0.61446                  |                |                |  |
| 22                                                             | 0.                  | 0.00263               | 1.32459                   |                |                |  |
| 23                                                             | 0.0003              | -0.0019               | -0.95353                  |                |                |  |
| 24                                                             | 0.00059             | -0.00214              | -1.07511                  |                |                |  |
| 25                                                             | 0.00032             | 0.00113               | 0.56617                   |                |                |  |
| 26                                                             | 0.00032             | -0.00031              | -0.15593                  |                |                |  |
| 27                                                             | 0.00002             | 0.00157               | 0.78774                   |                |                |  |
| 28                                                             | 0.00028             | -0.00163              | -0.81916                  |                |                |  |
| 29                                                             | -0.00015            | 0.00238               | 1.1951                    |                |                |  |
| 30                                                             | -0.00006            | -0.00037              | -0.18792                  |                |                |  |
| 31                                                             | -0.00016            | 0.00064               | 0.32373                   |                |                |  |

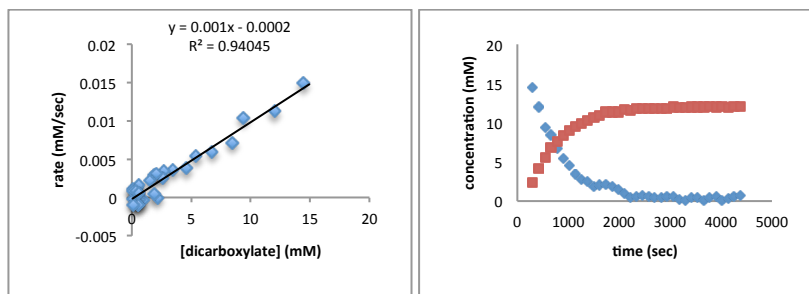

2<sup>nd</sup> run:

### Linear Regression

#### Regression Statistics

|                              |         |
|------------------------------|---------|
| R                            | 0.97778 |
| R Square                     | 0.95605 |
| Adjusted R Square            | 0.95467 |
| S                            | 0.0008  |
| Total number of observations | 34      |

$$0.00798742281566 = -0.0003 + 0.0012 * 14.4421610342286$$

#### ANOVA

|            | d.f. | SS      | MS      | F         | p-level |
|------------|------|---------|---------|-----------|---------|
| Regression | 1.   | 0.00044 | 0.00044 | 696.05742 | 0.E+0   |
| Residual   | 32.  | 0.00002 | 0.      |           |         |
| Total      | 33.  | 0.00046 |         |           |         |

|                         | Coefficients   | Standard Error | LCL            | UCL            | t Stat         |
|-------------------------|----------------|----------------|----------------|----------------|----------------|
| Intercept               | -0.00032       | 0.00017        | -0.00061       | -0.00003       | -1.8575        |
| <b>14.4421610342286</b> | <b>0.00124</b> | <b>0.00005</b> | <b>0.00116</b> | <b>0.00132</b> | <b>26.3829</b> |
| T (10%)                 | 1.69389        |                |                |                |                |

LCL - Lower value of a reliable interval (LCL)  
UCL - Upper value of a reliable interval (UCL)

#### Residuals

| Observation | Predicted Y | Residual | Standard Residuals |
|-------------|-------------|----------|--------------------|
| 1           | 0.01458     | 0.00035  | 0.45251            |
| 2           | 0.01128     | -0.00008 | -0.09761           |
| 3           | 0.01014     | 0.00029  | 0.37178            |
| 4           | 0.00801     | -0.0009  | -1.14437           |
| 5           | 0.00639     | -0.00039 | -0.49174           |
| 6           | 0.00537     | -0.00002 | -0.01954           |
| 7           | 0.00397     | -0.00017 | -0.2203            |
| 8           | 0.00303     | 0.00057  | 0.733              |
| 9           | 0.00287     | 0.00064  | 0.81442            |
| 10          | 0.00205     | 0.00048  | 0.60725            |
| 11          | 0.00222     | 0.00075  | 0.95409            |
| 12          | 0.00233     | 0.00077  | 0.98798            |
| 13          | 0.002       | -0.00205 | -2.62056           |
| 14          | 0.00153     | -0.00103 | -1.3172            |
| 15          | 0.00088     | 0.00132  | 1.68799            |
| 16          | 0.00022     | -0.00061 | -0.77879           |
| 17          | 0.00039     | 0.0009   | 1.14455            |
| 18          | 0.00051     | -0.00054 | -0.68676           |
| 19          | 0.00036     | -0.00058 | -0.73998           |
| 20          | 0.00033     | 0.0002   | 0.26093            |
| 21          | 0.00022     | 0.00016  | 0.20837            |
| 22          | 0.00041     | -0.00036 | -0.4565            |
| 23          | 0.00037     | 0.00124  | 1.58116            |
| 24          | -0.00014    | -0.00085 | -1.07998           |
| 25          | -0.00024    | 0.00006  | 0.07405            |
| 26          | 0.00018     | 0.00092  | 1.17729            |
| 27          | 0.00031     | -0.00085 | -1.07951           |
| 28          | -0.00021    | 0.00049  | 0.62632            |
| 29          | 0.00034     | 0.00054  | 0.68896            |
| 30          | 0.00038     | -0.00133 | -1.70274           |
| 31          | -0.00017    | 0.00071  | 0.9042             |
| 32          | 0.00008     | -0.00103 | -1.30942           |

3<sup>rd</sup> run:

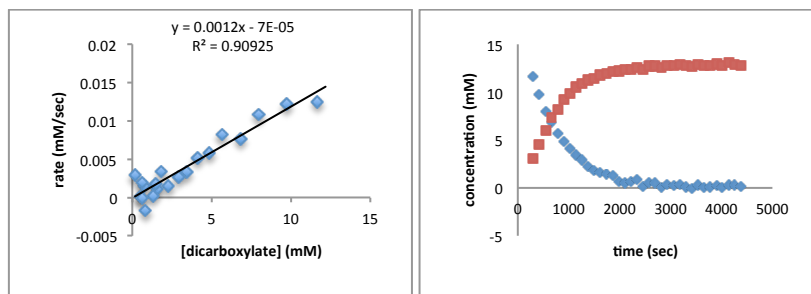

### Linear Regression

#### Regression Statistics

|                              |         |
|------------------------------|---------|
| R                            | 0.96813 |
| R Square                     | 0.93727 |
| Adjusted R Square            | 0.93378 |
| S                            | 0.00108 |
| Total number of observations | 20      |

$$0.01010936698823 = -0.0002 + 0.0015 * 11.6801091192353$$

#### ANOVA

|            | d.f. | SS      | MS      | F         | p-level     |
|------------|------|---------|---------|-----------|-------------|
| Regression | 1.   | 0.00031 | 0.00031 | 268.92646 | 2.87359E-12 |
| Residual   | 18.  | 0.00002 | 0.      |           |             |
| Total      | 19.  | 0.00033 |         |           |             |

|                         | Coefficients   | Standard Error | LCL           | UCL            | t Stat          |
|-------------------------|----------------|----------------|---------------|----------------|-----------------|
| Intercept               | -0.00015       | 0.00035        | -0.00076      | 0.00046        | -0.42957        |
| <b>11.6801091192353</b> | <b>0.00145</b> | <b>0.00009</b> | <b>0.0013</b> | <b>0.00161</b> | <b>16.39898</b> |

T (10%) 1.73406  
 LCL - Lower value of a reliable interval (LCL)  
 UCL - Upper value of a reliable interval (UCL)

#### Residuals

| Observation | Predicted Y | Residual | Standard Residuals |
|-------------|-------------|----------|--------------------|
| 1           | 0.01398     | -0.00152 | -1.44741           |
| 2           | 0.01144     | 0.00074  | 0.70378            |
| 3           | 0.0098      | 0.00101  | 0.96588            |
| 4           | 0.00809     | -0.00045 | -0.42838           |
| 5           | 0.00689     | 0.00136  | 1.29885            |
| 6           | 0.00582     | 0.       | -0.00272           |
| 7           | 0.00484     | 0.00031  | 0.2938             |
| 8           | 0.0041      | -0.00079 | -0.75075           |
| 9           | 0.00312     | -0.00039 | -0.37091           |
| 10          | 0.00248     | -0.00093 | -0.8851            |
| 11          | 0.00213     | 0.00122  | 1.1666             |
| 12          | 0.00197     | -0.00086 | -0.81661           |
| 13          | 0.00174     | -0.00003 | -0.03215           |
| 14          | 0.00089     | -0.00067 | -0.6405            |
| 15          | 0.00056     | 0.00093  | 0.88266            |
| 16          | 0.00075     | -0.0006  | -0.57484           |
| 17          | 0.00103     | 0.00092  | 0.88042            |
| 18          | 0.0001      | -0.00185 | -1.76418           |
| 19          | 0.00072     | 0.00217  | 2.07259            |
| 20          | 0.00053     | -0.00058 | -0.55103           |



**X = H (8a)**

| run     | $k$ (sec <sup>-1</sup> ) |
|---------|--------------------------|
| 1       | 1.2(1)x10 <sup>-3</sup>  |
| 2       | 1.37(5)x10 <sup>-3</sup> |
| 3       | 0.9(2)x10 <sup>-3</sup>  |
| average | 1.2(1)x10 <sup>-3</sup>  |

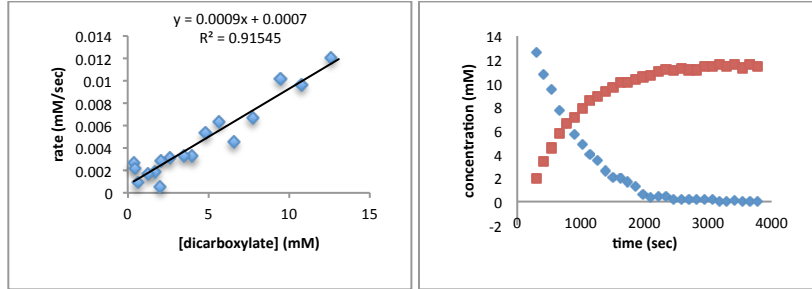

1<sup>st</sup> run:

**Linear Regression**

**Regression Statistics**

|                              |         |
|------------------------------|---------|
| R                            | 0.86252 |
| R Square                     | 0.74394 |
| Adjusted R Square            | 0.73479 |
| S                            | 0.00183 |
| Total number of observations | 30      |

**= 0.0139 - 0.0012 \* 0**

**ANOVA**

|            | d.f. | SS      | MS      | F        | p-level |
|------------|------|---------|---------|----------|---------|
| Regression | 1.   | 0.00027 | 0.00027 | 81.34771 | 0.      |
| Residual   | 28.  | 0.00009 | 0.      |          |         |
| Total      | 29.  | 0.00037 |         |          |         |

|           | Coefficients | Standard Error | LCL      | UCL      | t Stat   |
|-----------|--------------|----------------|----------|----------|----------|
| Intercept | 0.01386      | 0.00127        | 0.0117   | 0.01601  | 10.94791 |
| 0         | -0.00116     | 0.00013        | -0.00138 | -0.00094 | -9.0193  |

T (10%) 1.70113  
 LCL - Lower value of a reliable interval (LCL)  
 UCL - Upper value of a reliable interval (UCL)

**Residuals**

| Observation | Predicted Y | Residual | Standard Residuals |
|-------------|-------------|----------|--------------------|
| 1           | 0.01159     | -0.00508 | -2.8251            |
| 2           | 0.0099      | 0.00214  | 1.19141            |
| 3           | 0.00855     | 0.00113  | 0.62776            |
| 4           | 0.00713     | 0.00308  | 1.71251            |
| 5           | 0.0062      | 0.00047  | 0.26073            |
| 6           | 0.00556     | -0.00097 | -0.53789           |
| 7           | 0.00467     | 0.00166  | 0.92462            |
| 8           | 0.00393     | 0.0014   | 0.7766             |
| 9           | 0.00348     | -0.00024 | -0.13382           |
| 10          | 0.00302     | 0.00029  | 0.16067            |
| 11          | 0.00259     | 0.00048  | 0.26864            |
| 12          | 0.00219     | 0.00071  | 0.39306            |
| 13          | 0.00212     | -0.00162 | -0.89803           |
| 14          | 0.00185     | 0.00006  | 0.03561            |
| 15          | 0.00162     | 0.00005  | 0.0263             |
| 16          | 0.00149     | -0.00057 | -0.31908           |
| 17          | 0.00112     | 0.00154  | 0.85581            |
| 18          | 0.00081     | 0.00138  | 0.76953            |
| 19          | 0.00097     | -0.00208 | -1.15694           |
| 20          | 0.00077     | 0.00067  | 0.37096            |
| 21          | 0.00092     | -0.00205 | -1.14173           |
| 22          | 0.0009      | -0.00076 | -0.42325           |
| 23          | 0.00057     | 0.00183  | 1.01709            |
| 24          | 0.0006      | -0.00078 | -0.43563           |
| 25          | 0.00034     | 0.00153  | 0.84967            |
| 26          | 0.00054     | -0.00198 | -1.10203           |
| 27          | 0.00037     | 0.00085  | 0.47161            |
| 28          | 0.00069     | -0.00297 | -1.6535            |
| 29          | 0.00035     | 0.00208  | 1.15565            |
| 30          | 0.00058     | -0.00223 | -1.24121           |

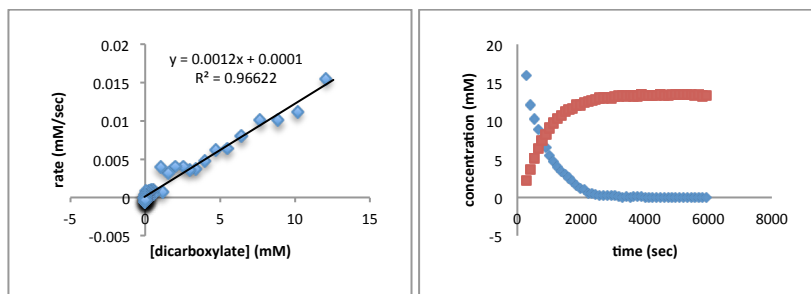

2<sup>nd</sup> run:

### Linear Regression

#### Regression Statistics

|                              |         |
|------------------------------|---------|
| R                            | 0.96822 |
| R Square                     | 0.93746 |
| Adjusted R Square            | 0.936   |
| S                            | 0.00079 |
| Total number of observations | 45      |

$$0.0155353789407 = 0.0002 + 0.0014 * 10.1970900546371$$

#### ANOVA

|            | d.f. | SS      | MS     | F         | p-level |
|------------|------|---------|--------|-----------|---------|
| Regression | 1.   | 0.0004  | 0.0004 | 644.54418 | 0.E+0   |
| Residual   | 43.  | 0.00003 | 0.     |           |         |
| Total      | 44.  | 0.00043 |        |           |         |

|                                                | Coefficients | Standard Error | LCL      | UCL     | t Stat   |
|------------------------------------------------|--------------|----------------|----------|---------|----------|
| Intercept                                      | 0.0002       | 0.00013        | -0.00002 | 0.00043 | 1.49759  |
| 10.1970900546371                               | 0.00137      | 0.00005        | 0.00127  | 0.00146 | 25.38787 |
| T (10%)                                        | 1.68107      |                |          |         |          |
| LCL - Lower value of a reliable interval (LCL) |              |                |          |         |          |
| UCL - Upper value of a reliable interval (UCL) |              |                |          |         |          |

#### Residuals

| Observation | Predicted Y | Residual | Standard Residuals |
|-------------|-------------|----------|--------------------|
| 1           | 0.0123      | -0.00115 | -1.46815           |
| 2           | 0.01065     | -0.00058 | -0.74745           |
| 3           | 0.009       | 0.00107  | 1.36998            |
| 4           | 0.0077      | 0.00026  | 0.33305            |
| 5           | 0.00665     | -0.00028 | -0.3531            |
| 6           | 0.00563     | 0.00062  | 0.79075            |
| 7           | 0.00483     | 0.00001  | 0.01525            |
| 8           | 0.00423     | -0.00052 | -0.66794           |
| 9           | 0.00364     | -0.00004 | -0.0488            |
| 10          | 0.00297     | 0.00113  | 1.44562            |
| 11          | 0.0023      | 0.00175  | 2.24094            |
| 12          | 0.00177     | 0.00148  | 1.90191            |
| 13          | 0.00165     | -0.00091 | -1.17211           |
| 14          | 0.001       | 0.00296  | 3.79889            |
| 15          | 0.00092     | -0.00043 | -0.55527           |
| 16          | 0.00077     | 0.00018  | 0.23055            |
| 17          | 0.00061     | 0.00033  | 0.42248            |
| 18          | 0.00046     | 0.00045  | 0.57994            |
| 19          | 0.00049     | -0.00066 | -0.84178           |
| 20          | 0.00049     | -0.00049 | -0.62389           |
| 21          | 0.00051     | -0.00064 | -0.81402           |
| 22          | 0.00037     | 0.00048  | 0.61898            |
| 23          | 0.00027     | 0.00033  | 0.41838            |
| 24          | 0.00034     | -0.00072 | -0.92816           |
| 25          | 0.00028     | 0.00008  | 0.10253            |
| 26          | 0.00033     | -0.00068 | -0.87528           |
| 27          | 0.00036     | -0.00049 | -0.625             |
| 28          | 0.00034     | -0.00025 | -0.32571           |
| 29          | 0.00025     | 0.00031  | 0.39633            |
| 30          | 0.00029     | -0.00051 | -0.64838           |
| 31          | 0.00022     | 0.00016  | 0.20384            |
| 32          | 0.0003      | -0.00078 | -1.00571           |

3<sup>rd</sup> run:

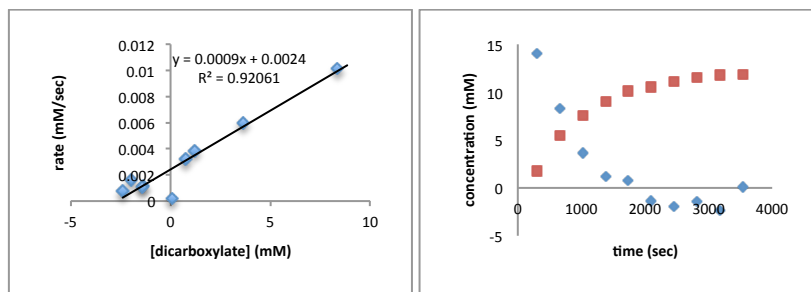

**Linear Regression**

**Regression Statistics**

|                              |         |
|------------------------------|---------|
| R                            | 0.74971 |
| R Square                     | 0.56206 |
| Adjusted R Square            | 0.54522 |
| S                            | 0.00242 |
| Total number of observations | 28      |

**= 0.0117 - 0.0009 \* 0**

**ANOVA**

|            | d.f. | SS      | MS      | F       | p-level |
|------------|------|---------|---------|---------|---------|
| Regression | 1.   | 0.00019 | 0.00019 | 33.3692 | 0.      |
| Residual   | 26.  | 0.00015 | 0.00001 |         |         |
| Total      | 27.  | 0.00035 |         |         |         |

|           | Coefficients | Standard Error | LCL      | UCL      | t Stat   |
|-----------|--------------|----------------|----------|----------|----------|
| Intercept | 0.01172      | 0.00154        | 0.00909  | 0.01435  | 7.60057  |
| 0         | -0.00092     | 0.00016        | -0.00119 | -0.00065 | -5.77661 |

T (10%) 1.70562  
 LCL - Lower value of a reliable interval (LCL)  
 UCL - Upper value of a reliable interval (UCL)

**Residuals**

| Observation | Predicted Y | Residual | Standard Residuals |
|-------------|-------------|----------|--------------------|
| 1           | 0.01007     | -0.00412 | -1.739             |
| 2           | 0.00925     | -0.00182 | -0.76872           |
| 3           | 0.00791     | 0.0042   | 1.77284            |
| 4           | 0.00671     | 0.00415  | 1.75098            |
| 5           | 0.00645     | -0.00408 | -1.72217           |
| 6           | 0.00551     | 0.00304  | 1.28323            |
| 7           | 0.00473     | 0.00233  | 0.98507            |
| 8           | 0.00419     | 0.00074  | 0.31263            |
| 9           | 0.00379     | -0.00016 | -0.06924           |
| 10          | 0.00346     | -0.00052 | -0.2197            |
| 11          | 0.00309     | 0.00024  | 0.10221            |
| 12          | 0.00245     | 0.0034   | 1.43575            |
| 13          | 0.00241     | -0.00206 | -0.86827           |
| 14          | 0.00214     | 0.00031  | 0.13204            |
| 15          | 0.00182     | 0.00108  | 0.4562             |
| 16          | 0.00202     | -0.00384 | -1.61931           |
| 17          | 0.00165     | 0.00169  | 0.7111             |
| 18          | 0.00145     | 0.00033  | 0.1377             |
| 19          | 0.00148     | -0.00175 | -0.73769           |
| 20          | 0.00138     | -0.00044 | -0.18509           |
| 21          | 0.00113     | 0.00112  | 0.47434            |
| 22          | 0.00112     | -0.00105 | -0.44226           |
| 23          | 0.00134     | -0.00335 | -1.41311           |
| 24          | 0.00102     | 0.00189  | 0.79694            |
| 25          | 0.00088     | 0.00043  | 0.18047            |
| 26          | 0.00072     | 0.00073  | 0.31011            |
| 27          | 0.00093     | -0.00287 | -1.20892           |
| 28          | 0.0008      | 0.00036  | 0.15188            |

**X = Cl (8c)**

| run     | $k$ (sec <sup>-1</sup> ) |
|---------|--------------------------|
| 1       | 1.1(1)x10 <sup>-3</sup>  |
| 2       | 1.08(8)x10 <sup>-3</sup> |
| 3       | 1.4(1)x10 <sup>-3</sup>  |
| average | 1.2(1)x10 <sup>-3</sup>  |

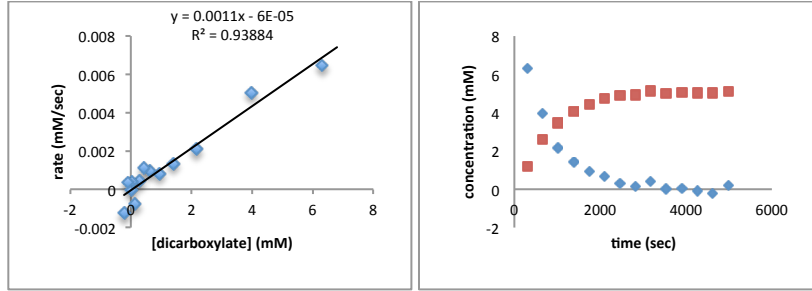

**Linear Regression**

**Regression Statistics**

|                              |         |
|------------------------------|---------|
| R                            | 0.96894 |
| R Square                     | 0.93884 |
| Adjusted R Square            | 0.93328 |
| S                            | 0.00056 |
| Total number of observations | 13      |

**0.0182933434491 = -0.0001 + 0.0011 \* 11.8**

**ANOVA**

|            | d.f. | SS      | MS      | F         | p-level |
|------------|------|---------|---------|-----------|---------|
| Regression | 1.   | 0.00005 | 0.00005 | 168.85032 | 0.      |
| Residual   | 11.  | 0.      | 0.      |           |         |
| Total      | 12.  | 0.00006 |         |           |         |

|                  | Coefficients | Standard Error | LCL      | UCL     | t Stat   |
|------------------|--------------|----------------|----------|---------|----------|
| <b>Intercept</b> | -0.00006     | 0.00019        | -0.00039 | 0.00028 | -0.29795 |
| <b>11.8</b>      | 0.0011       | 0.00008        | 0.00095  | 0.00125 | 12.99424 |

T (10%) 1.79588  
 LCL - Lower value of a reliable interval (LCL)  
 UCL - Upper value of a reliable interval (UCL)

**Residuals**

| Observation | Predicted Y | Residual | Standard Residuals |
|-------------|-------------|----------|--------------------|
| 1           | 0.00687     | -0.0004  | -0.75323           |
| 2           | 0.00431     | 0.00071  | 1.3293             |
| 3           | 0.00232     | -0.00023 | -0.43656           |
| 4           | 0.0015      | -0.00016 | -0.30089           |
| 5           | 0.00097     | -0.00014 | -0.26406           |
| 6           | 0.00064     | 0.0003   | 0.56213            |
| 7           | 0.00027     | 0.00014  | 0.2588             |
| 8           | 0.00011     | -0.00088 | -1.63753           |
| 9           | 0.00041     | 0.00072  | 1.33439            |
| 10          | -0.00003    | -0.00001 | -0.0169            |
| 11          | -0.00002    | 0.00039  | 0.72751            |
| 12          | -0.00016    | 0.00051  | 0.94347            |
| 13          | -0.0003     | -0.00094 | -1.74643           |

2<sup>nd</sup> run:

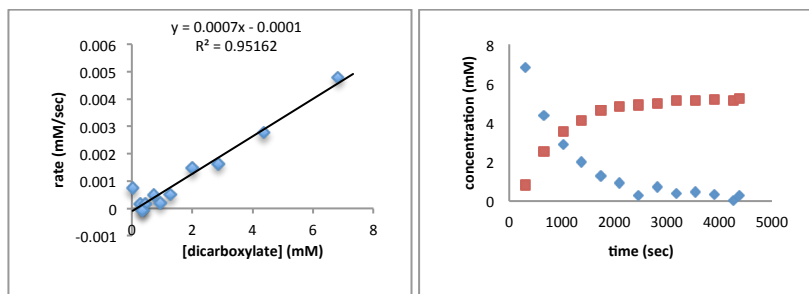

**Linear Regression**

**Regression Statistics**

|                              |         |
|------------------------------|---------|
| R                            | 0.97537 |
| R Square                     | 0.95135 |
| Adjusted R Square            | 0.94648 |
| S                            | 0.00033 |
| Total number of observations | 12      |

**0.00269742022416 = - 0.0002 + 0.0011 \* 6.82558667805555**

**ANOVA**

|            | d.f. | SS      | MS      | F        | p-level |
|------------|------|---------|---------|----------|---------|
| Regression | 1.   | 0.00002 | 0.00002 | 195.5336 | 0.      |
| Residual   | 10.  | 0.      | 0.      |          |         |
| Total      | 11.  | 0.00002 |         |          |         |

|                         | Coefficients | Standard Error | LCL      | UCL     | t Stat   |
|-------------------------|--------------|----------------|----------|---------|----------|
| <b>Intercept</b>        | -0.0002      | 0.00013        | -0.00043 | 0.00004 | -1.48132 |
| <b>6.82558667805555</b> | 0.00108      | 0.00008        | 0.00094  | 0.00122 | 13.98333 |

T (10%) 1.81246  
 LCL - Lower value of a reliable interval (LCL)  
 UCL - Upper value of a reliable interval (UCL)

**Residuals**

| Observation | Predicted Y | Residual | Standard Residuals |
|-------------|-------------|----------|--------------------|
| 1           | 0.00452     | 0.00027  | 0.83642            |
| 2           | 0.00291     | -0.00015 | -0.46616           |
| 3           | 0.00196     | -0.00032 | -0.99613           |
| 4           | 0.00119     | 0.00028  | 0.87156            |
| 5           | 0.00081     | -0.00031 | -0.97048           |
| 6           | 0.00011     | 0.0001   | 0.30621            |
| 7           | 0.0006      | -0.00043 | -1.35872           |
| 8           | 0.00023     | 0.00025  | 0.78112            |
| 9           | 0.0003      | -0.00035 | -1.09174           |
| 10          | 0.00017     | -0.00002 | -0.05018           |
| 11          | -0.00017    | 0.00008  | 0.24467            |
| 12          | 0.00013     | 0.0006   | 1.89342            |

3<sup>rd</sup> run:

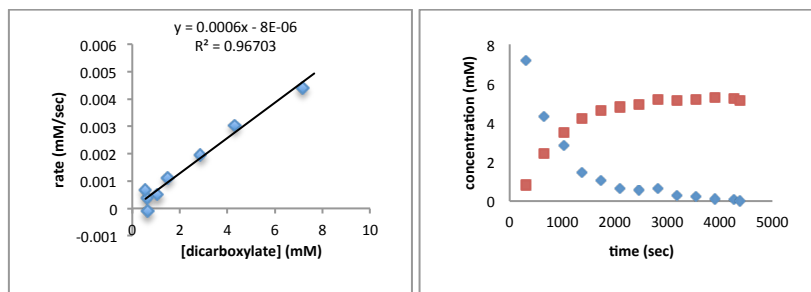

**Linear Regression**

**Regression Statistics**

|                              |         |
|------------------------------|---------|
| R                            | 0.90939 |
| R Square                     | 0.82699 |
| Adjusted R Square            | 0.81947 |
| S                            | 0.00069 |
| Total number of observations | 25      |

**0.00273404633315 = 0.0072 - 0.0014 \* 0.82158092284047**

**ANOVA**

|            | d.f. | SS      | MS      | F         | p-level |
|------------|------|---------|---------|-----------|---------|
| Regression | 1.   | 0.00005 | 0.00005 | 109.94138 | 0.      |
| Residual   | 23.  | 0.00001 | 0.      |           |         |
| Total      | 24.  | 0.00006 |         |           |         |

|                                                | Coefficients | Standard Error | LCL      | UCL      | t Stat    |
|------------------------------------------------|--------------|----------------|----------|----------|-----------|
| <b>Intercept</b>                               | 0.00721      | 0.00057        | 0.00623  | 0.00819  | 12.61944  |
| <b>0.82158092284047</b>                        | -0.00138     | 0.00013        | -0.00161 | -0.00116 | -10.48529 |
| T (10%)                                        | 1.71387      |                |          |          |           |
| LCL - Lower value of a reliable interval (LCL) |              |                |          |          |           |
| UCL - Upper value of a reliable interval (UCL) |              |                |          |          |           |

**Residuals**

| Observation | Predicted Y | Residual | Standard Residuals |
|-------------|-------------|----------|--------------------|
| 1           | 0.00524     | -0.00016 | -0.22976           |
| 2           | 0.00454     | -0.0003  | -0.44848           |
| 3           | 0.00388     | 0.00004  | 0.06479            |
| 4           | 0.00322     | 0.00078  | 1.14939            |
| 5           | 0.00284     | -0.00052 | -0.76521           |
| 6           | 0.00238     | 0.0004   | 0.58965            |
| 7           | 0.00212     | -0.00056 | -0.82421           |
| 8           | 0.00171     | 0.00074  | 1.08954            |
| 9           | 0.0014      | 0.00047  | 0.69425            |
| 10          | 0.00106     | 0.00103  | 1.52226            |
| 11          | 0.00108     | -0.00122 | -1.79426           |
| 12          | 0.00085     | 0.00055  | 0.81538            |
| 13          | 0.00077     | -0.00033 | -0.48703           |
| 14          | 0.00061     | 0.00038  | 0.56091            |
| 15          | 0.00059     | -0.00049 | -0.71918           |
| 16          | 0.00062     | -0.00076 | -1.12187           |
| 17          | 0.00047     | 0.0004   | 0.58204            |
| 18          | 0.00039     | 0.00008  | 0.11839            |
| 19          | 0.00025     | 0.00063  | 0.92592            |
| 20          | 0.00028     | -0.00044 | -0.64739           |
| 21          | 0.00006     | 0.00122  | 1.78874            |
| 22          | 0.00017     | -0.00078 | -1.14863           |
| 23          | 0.00007     | 0.00053  | 0.78361            |
| 24          | 0.00012     | -0.00044 | -0.64706           |
| 25          | 0.00028     | -0.00126 | -1.85179           |

**X = NO<sub>2</sub> (8b)**

| run     | <i>k</i> (sec <sup>-1</sup> ) |
|---------|-------------------------------|
| 1       | 7.6(7)x10 <sup>-4</sup>       |
| 2       | 8.8(5)x10 <sup>-4</sup>       |
| 3       | 7.2(6)x10 <sup>-4</sup>       |
| average | 7.9(6)x10 <sup>-4</sup>       |

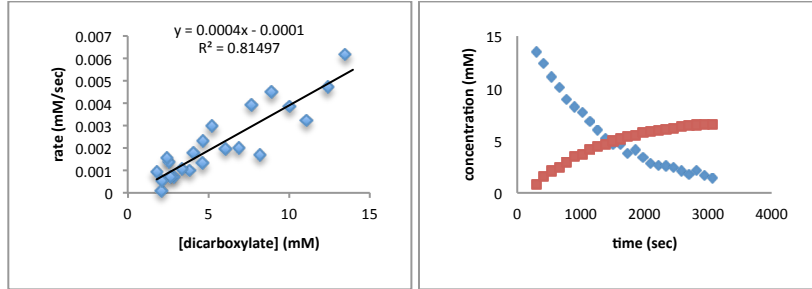

1<sup>st</sup> run:

**Linear Regression**

**Regression Statistics**

|                              |         |
|------------------------------|---------|
| R                            | 0.83531 |
| R Square                     | 0.69774 |
| Adjusted R Square            | 0.69144 |
| S                            | 0.00087 |
| Total number of observations | 50      |

**= 0.0057 - 0.0008 \* 0**

**ANOVA**

|            | d.f. | SS      | MS      | F         | p-level     |
|------------|------|---------|---------|-----------|-------------|
| Regression | 1.   | 0.00008 | 0.00008 | 110.80289 | 4.59632E-14 |
| Residual   | 48.  | 0.00004 | 0.      |           |             |
| Total      | 49.  | 0.00012 |         |           |             |

|           | Coefficients | Standard Error | LCL      | UCL      | t Stat   |
|-----------|--------------|----------------|----------|----------|----------|
| Intercept | 0.00571      | 0.00045        | 0.00495  | 0.00647  | 12.62217 |
| 0         | -0.00076     | 0.00007        | -0.00089 | -0.00064 | -10.5263 |

T (10%)

1.67722

LCL - Lower value of a reliable interval (LCL)

UCL - Upper value of a reliable interval (UCL)

**Residuals**

| Observation | Predicted Y | Residual | Standard Residuals |
|-------------|-------------|----------|--------------------|
| 1           | 0.00511     | -0.00252 | -2.92737           |
| 2           | 0.00455     | 0.00162  | 1.87595            |
| 3           | 0.00411     | 0.00061  | 0.71236            |
| 4           | 0.00382     | -0.00059 | -0.6901            |
| 5           | 0.00346     | 0.0004   | 0.465              |
| 6           | 0.00305     | 0.00145  | 1.67968            |
| 7           | 0.0029      | -0.00121 | -1.40067           |
| 8           | 0.00254     | 0.00137  | 1.58578            |
| 9           | 0.00236     | -0.00035 | -0.40509           |
| 10          | 0.00217     | -0.00018 | -0.21259           |
| 11          | 0.0019      | 0.00108  | 1.25104            |
| 12          | 0.00178     | -0.00047 | -0.5461            |
| 13          | 0.00157     | 0.00076  | 0.88202            |
| 14          | 0.00148     | -0.00048 | -0.5516            |
| 15          | 0.00131     | 0.00045  | 0.52106            |
| 16          | 0.00122     | -0.00016 | -0.19062           |
| 17          | 0.00115     | -0.00042 | -0.48995           |
| 18          | 0.00108     | -0.00036 | -0.4178            |
| 19          | 0.00096     | 0.00042  | 0.49317            |
| 20          | 0.00082     | 0.00073  | 0.85111            |
| 21          | 0.00081     | -0.00072 | -0.83526           |
| 22          | 0.00072     | 0.0002   | 0.22941            |
| 23          | 0.00067     | -0.00015 | -0.16929           |
| 24          | 0.00071     | -0.00113 | -1.30619           |
| 25          | 0.0006      | 0.00068  | 0.79092            |
| 26          | 0.0005      | 0.0005   | 0.57927            |
| 27          | 0.00046     | 0.       | 0.00196            |
| 28          | 0.00037     | 0.0006   | 0.69675            |
| 29          | 0.00042     | -0.00091 | -1.05878           |
| 30          | 0.00025     | 0.00155  | 1.80135            |
| 31          | 0.00029     | -0.00072 | -0.8386            |
| 32          | 0.00032     | -0.00064 | -0.7376            |

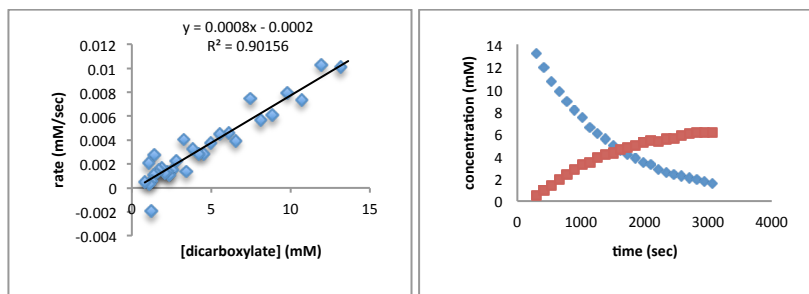

2<sup>nd</sup> run:

**Linear Regression**

**Regression Statistics**

|                              |         |
|------------------------------|---------|
| R                            | 0.92561 |
| R Square                     | 0.85675 |
| Adjusted R Square            | 0.85371 |
| S                            | 0.0011  |
| Total number of observations | 49      |

**-0.00444431177816 = -0.0003 + 0.0009 \* 13.1355156888928**

**ANOVA**

|            | d.f. | SS      | MS      | F         | p-level |
|------------|------|---------|---------|-----------|---------|
| Regression | 1.   | 0.00034 | 0.00034 | 281.10522 | 0.E+0   |
| Residual   | 47.  | 0.00006 | 0.      |           |         |
| Total      | 48.  | 0.0004  |         |           |         |

|                         | Coefficients | Standard Error | LCL      | UCL     | t Stat   |
|-------------------------|--------------|----------------|----------|---------|----------|
| <b>Intercept</b>        | -0.00028     | 0.00021        | -0.00064 | 0.00008 | -1.31894 |
| <b>13.1355156888928</b> | 0.00088      | 0.00005        | 0.00079  | 0.00097 | 16.76619 |

T (10%) 1.67793  
 LCL - Lower value of a reliable interval (LCL)  
 UCL - Upper value of a reliable interval (UCL)

**Residuals**

| Observation | Predicted Y | Residual | Standard Residuals |
|-------------|-------------|----------|--------------------|
| 1           | 0.01019     | -0.00013 | -0.11892           |
| 2           | 0.00911     | 0.00119  | 1.08996            |
| 3           | 0.00833     | -0.00095 | -0.8676            |
| 4           | 0.00749     | 0.00043  | 0.39636            |
| 5           | 0.00686     | -0.0008  | -0.72934           |
| 6           | 0.00626     | -0.0006  | -0.55048           |
| 7           | 0.00547     | 0.00198  | 1.81026            |
| 8           | 0.00506     | -0.0011  | -1.01133           |
| 9           | 0.00457     | 0.00002  | 0.02085            |
| 10          | 0.00409     | 0.00045  | 0.41229            |
| 11          | 0.0037      | 0.00005  | 0.04179            |
| 12          | 0.0034      | -0.00051 | -0.46842           |
| 13          | 0.00309     | -0.00022 | -0.19991           |
| 14          | 0.00275     | 0.0005   | 0.45336            |
| 15          | 0.0026      | -0.00121 | -1.11264           |
| 16          | 0.00218     | 0.00184  | 1.68573            |
| 17          | 0.00194     | 0.0003   | 0.27209            |
| 18          | 0.00179     | -0.0003  | -0.2758            |
| 19          | 0.00168     | -0.00064 | -0.58213           |
| 20          | 0.00153     | -0.00016 | -0.14736           |
| 21          | 0.0014      | -0.00014 | -0.12475           |
| 22          | 0.00122     | 0.00046  | 0.42248            |
| 23          | 0.00107     | 0.00042  | 0.38559            |
| 24          | 0.00094     | 0.00024  | 0.21996            |
| 25          | 0.00083     | 0.00023  | 0.21391            |
| 26          | 0.00077     | -0.0002  | -0.18748           |
| 27          | 0.00098     | -0.00295 | -2.69798           |
| 28          | 0.00069     | 0.00206  | 1.88524            |
| 29          | 0.00065     | -0.00029 | -0.26518           |
| 30          | 0.00043     | 0.00163  | 1.49338            |
| 31          | 0.00038     | 0.00012  | 0.11432            |
| 32          | 0.00041     | -0.0007  | -0.64326           |



3<sup>rd</sup> run:

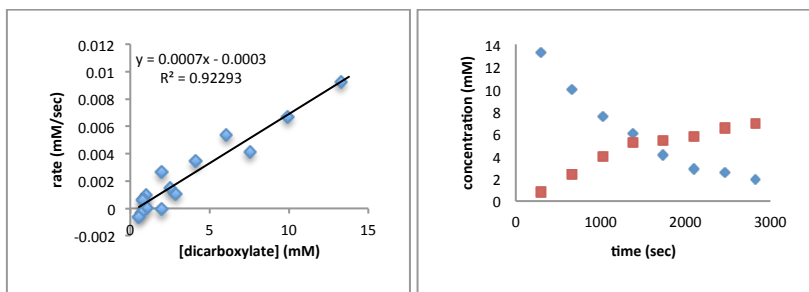

**Linear Regression**

**Regression Statistics**

|                              |         |
|------------------------------|---------|
| R                            | 0.96069 |
| R Square                     | 0.92293 |
| Adjusted R Square            | 0.917   |
| S                            | 0.00083 |
| Total number of observations | 15      |

**-0.00492232160507 = - 0.0003 + 0.0007 \* 11.8**

**ANOVA**

|            | d.f. | SS      | MS      | F         | p-level |
|------------|------|---------|---------|-----------|---------|
| Regression | 1.   | 0.00011 | 0.00011 | 155.67583 | 0.      |
| Residual   | 13.  | 0.00001 | 0.      |           |         |
| Total      | 14.  | 0.00012 |         |           |         |

|                  | Coefficients | Standard Error | LCL      | UCL     | t Stat   |
|------------------|--------------|----------------|----------|---------|----------|
| <b>Intercept</b> | -0.00029     | 0.0003         | -0.00083 | 0.00025 | -0.95933 |
| <b>11.8</b>      | 0.00072      | 0.00006        | 0.00062  | 0.00082 | 12.47701 |

T (10%) 1.77093  
 LCL - Lower value of a reliable interval (LCL)  
 UCL - Upper value of a reliable interval (UCL)

**Residuals**

| Observation | Predicted Y | Residual | Standard Residuals |
|-------------|-------------|----------|--------------------|
| 1           | 0.00927     | -0.00001 | -0.01607           |
| 2           | 0.00687     | -0.00017 | -0.21525           |
| 3           | 0.00513     | -0.00101 | -1.25661           |
| 4           | 0.00407     | 0.00132  | 1.63568            |
| 5           | 0.00267     | 0.00078  | 0.96912            |
| 6           | 0.00178     | -0.00074 | -0.91784           |
| 7           | 0.00151     | -0.00004 | -0.04685           |
| 8           | 0.00113     | -0.00117 | -1.45439           |
| 9           | 0.00114     | 0.00149  | 1.84824            |
| 10          | 0.00046     | -0.00041 | -0.51047           |
| 11          | 0.00045     | 0.00051  | 0.62868            |
| 12          | 0.0002      | -0.00053 | -0.65761           |
| 13          | 0.00028     | 0.00042  | 0.52237            |
| 14          | 0.0001      | -0.00075 | -0.92886           |
| 15          | 0.00027     | 0.00032  | 0.39987            |

## Hammett Plots

| Benzoate        | $\sigma$ | $\sigma^+$ | $k$ (sec <sup>-1</sup> ) | $\log(k_X/k_H)$ |
|-----------------|----------|------------|--------------------------|-----------------|
| NO <sub>2</sub> | 0.81     | 0.79       | 0.00079                  | -0.181          |
| H               | 0        | 0          | 0.0012                   | 0               |
| Cl              | 0.24     | 0.11       | 0.0012                   | 0               |
| OMe             | -0.27    | -0.78      | 0.0019                   | 0.200           |
| Me              | -0.14    | -0.31      | 0.0014                   | 0.067           |

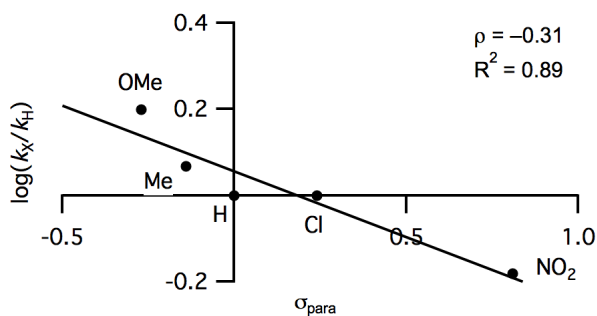

### Linear Regression

#### Regression Statistics

|                              |         |
|------------------------------|---------|
| R                            | 0.94384 |
| R Square                     | 0.89083 |
| Adjusted R Square            | 0.85444 |
| S                            | 0.05253 |
| Total number of observations | 5       |

$$\log(kX/kH) = 0.0561 - 0.3054 * \sigma_{para}$$

#### ANOVA

|            | d.f. | SS      | MS      | F        | p-level |
|------------|------|---------|---------|----------|---------|
| Regression | 1.   | 0.06755 | 0.06755 | 24.47983 | 0.01584 |
| Residual   | 3.   | 0.00828 | 0.00276 |          |         |
| Total      | 4.   | 0.07583 |         |          |         |

|                                                | Coefficients | Standard Error | LCL      | UCL      | t Stat   |
|------------------------------------------------|--------------|----------------|----------|----------|----------|
| Intercept                                      | 0.05608      | 0.02479        | -0.00225 | 0.11441  | 2.26278  |
| ?                                              | -0.30539     | 0.06172        | -0.45066 | -0.16013 | -4.94771 |
| T (10%)                                        | 2.35336      |                |          |          |          |
| LCL - Lower value of a reliable interval (LCL) |              |                |          |          |          |
| UCL - Upper value of a reliable interval (UCL) |              |                |          |          |          |

#### Residuals

| Observation | Predicted Y | Residual | Standard Residuals |
|-------------|-------------|----------|--------------------|
| 1           | -0.19129    | 0.00973  | 0.21393            |
| 2           | 0.05608     | -0.05608 | -1.2328            |
| 3           | -0.01721    | 0.01721  | 0.37833            |
| 4           | 0.13854     | 0.06103  | 1.34158            |
| 5           | 0.09884     | -0.03189 | -0.70104           |

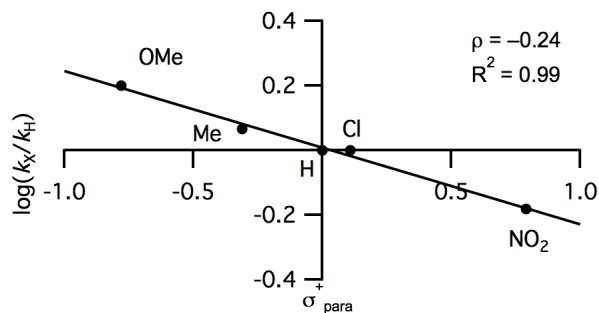

### Linear Regression

#### Regression Statistics

|                              |         |
|------------------------------|---------|
| R                            | 0.99569 |
| R Square                     | 0.99141 |
| Adjusted R Square            | 0.98854 |
| S                            | 0.01474 |
| Total number of observations | 5       |

$$\log(kX/kH) = 0.0080 - 0.2374 * \text{?+}$$

#### ANOVA

|            | d.f. | SS      | MS      | F         | p-level |
|------------|------|---------|---------|-----------|---------|
| Regression | 1.   | 0.07518 | 0.07518 | 346.09479 | 0.00034 |
| Residual   | 3.   | 0.00065 | 0.00022 |           |         |
| Total      | 4.   | 0.07583 |         |           |         |

|           | Coefficients | Standard Error | LCL      | UCL     | t Stat    |
|-----------|--------------|----------------|----------|---------|-----------|
| Intercept | 0.00797      | 0.00661        | -0.00758 | 0.02352 | 1.20599   |
| ?+        | -0.23744     | 0.01276        | -0.26747 | -0.2074 | -18.60362 |

T (10%)

LCL - Lower value of a reliable interval (LCL)

UCL - Upper value of a reliable interval (UCL)

#### Residuals

| Observation | Predicted Y | Residual | Standard Residuals |
|-------------|-------------|----------|--------------------|
| 1           | -0.17961    | -0.00195 | -0.15265           |
| 2           | 0.00797     | -0.00797 | -0.62445           |
| 3           | -0.01815    | 0.01815  | 1.42183            |
| 4           | 0.19317     | 0.0064   | 0.50144            |
| 5           | 0.08158     | -0.01463 | -1.14617           |

## Hammett Study of Benzylidene Chelate Complexes 10a-d

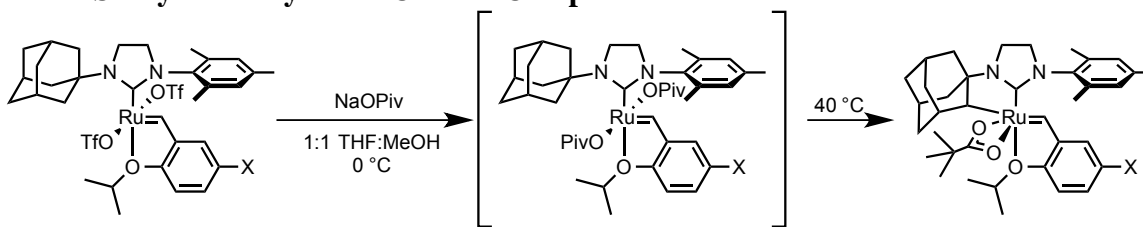

**X = OMe (S1)**

| run     | $k$ (sec <sup>-1</sup> ) |
|---------|--------------------------|
| 1       | 2.6(2) $\times 10^{-3}$  |
| 2       | 2.7(2) $\times 10^{-3}$  |
| 3       | 3.0(5) $\times 10^{-3}$  |
| average | 2.8(3) $\times 10^{-3}$  |

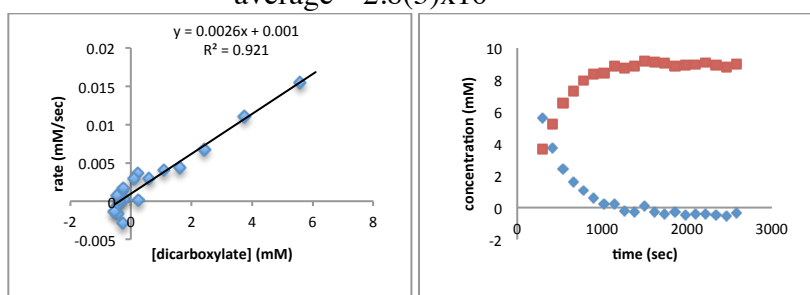

1<sup>st</sup> run:

### Linear Regression

#### Regression Statistics

|                              |         |
|------------------------------|---------|
| R                            | 0.95969 |
| R Square                     | 0.921   |
| Adjusted R Square            | 0.91635 |
| S                            | 0.0013  |
| Total number of observations | 19      |

$$0.02064533295452 = 0.0010 + 0.0026 * 11.8$$

#### ANOVA

|            | d.f. | SS      | MS      | F         | p-level     |
|------------|------|---------|---------|-----------|-------------|
| Regression | 1.   | 0.00033 | 0.00033 | 198.19501 | 8.43341E-11 |
| Residual   | 17.  | 0.00003 | 0.      |           |             |
| Total      | 18.  | 0.00036 |         |           |             |

|           | Coefficients | Standard Error | LCL     | UCL     | t Stat   |
|-----------|--------------|----------------|---------|---------|----------|
| Intercept | 0.00097      | 0.00032        | 0.00041 | 0.00153 | 3.03034  |
| 11.8      | 0.00261      | 0.00019        | 0.00228 | 0.00293 | 14.07817 |

T (10%) 1.73961

LCL - Lower value of a reliable interval (LCL)

UCL - Upper value of a reliable interval (UCL)

#### Residuals

| Observation | Predicted Y | Residual | Standard Residuals |
|-------------|-------------|----------|--------------------|
| 1           | 0.01555     | -0.00009 | -0.07152           |
| 2           | 0.01072     | 0.00033  | 0.26045            |
| 3           | 0.00726     | -0.00053 | -0.41947           |
| 4           | 0.00516     | -0.00076 | -0.60311           |
| 5           | 0.00378     | 0.00026  | 0.20363            |
| 6           | 0.00252     | 0.00048  | 0.37836            |
| 7           | 0.00158     | -0.00143 | -1.13383           |
| 8           | 0.00153     | 0.00212  | 1.67986            |
| 9           | 0.00039     | -0.00007 | -0.05337           |
| 10          | 0.00029     | -0.00319 | -2.53089           |
| 11          | 0.0012      | 0.00176  | 1.39702            |
| 12          | 0.00027     | 0.00114  | 0.90654            |
| 13          | -0.00017    | -0.00145 | -1.14882           |
| 14          | 0.00034     | 0.00136  | 1.07457            |
| 15          | -0.00019    | -0.00043 | -0.33967           |
| 16          | 0.          | 0.00002  | 0.01977            |
| 17          | -0.00001    | 0.00058  | 0.46183            |
| 18          | -0.00019    | 0.00089  | 0.70317            |
| 19          | -0.00041    | -0.00099 | -0.78453           |

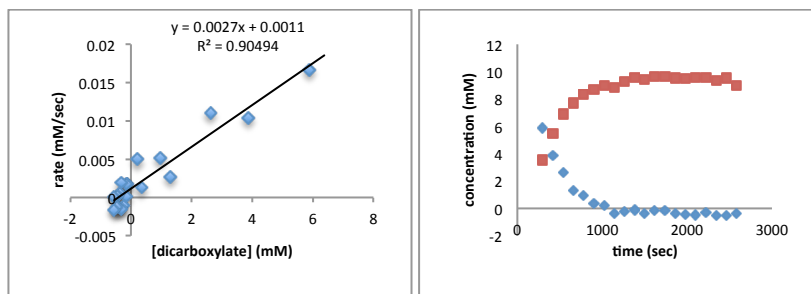

2<sup>nd</sup> run:

**Linear Regression**

**Regression Statistics**

|                              |         |
|------------------------------|---------|
| R                            | 0.95128 |
| R Square                     | 0.90494 |
| Adjusted R Square            | 0.89935 |
| S                            | 0.00158 |
| Total number of observations | 19      |

**0.01970239185308 = 0.0011 + 0.0027 \* 11.8**

**ANOVA**

|            | d.f. | SS      | MS      | F         | p-level |
|------------|------|---------|---------|-----------|---------|
| Regression | 1.   | 0.00041 | 0.00041 | 161.83309 | 0.      |
| Residual   | 17.  | 0.00004 | 0.      |           |         |
| Total      | 18.  | 0.00045 |         |           |         |

|                  | Coefficients | Standard Error | LCL     | UCL     | t Stat   |
|------------------|--------------|----------------|---------|---------|----------|
| <b>Intercept</b> | 0.00115      | 0.00038        | 0.00048 | 0.00181 | 2.98512  |
| <b>11.8</b>      | 0.00273      | 0.00021        | 0.00236 | 0.0031  | 12.72136 |

T (10%) 1.73961  
 LCL - Lower value of a reliable interval (LCL)  
 UCL - Upper value of a reliable interval (UCL)

**Residuals**

| Observation | Predicted Y | Residual | Standard Residuals |
|-------------|-------------|----------|--------------------|
| 1           | 0.01719     | -0.0005  | -0.32393           |
| 2           | 0.01173     | -0.0013  | -0.8426            |
| 3           | 0.00831     | 0.0028   | 1.82115            |
| 4           | 0.00467     | -0.00198 | -1.2856            |
| 5           | 0.00379     | 0.00135  | 0.87992            |
| 6           | 0.0021      | -0.00082 | -0.53599           |
| 7           | 0.00169     | 0.00332  | 2.15811            |
| 8           | 0.00005     | -0.00134 | -0.87118           |
| 9           | 0.00047     | -0.00154 | -1.00295           |
| 10          | 0.00082     | 0.00089  | 0.57951            |
| 11          | 0.00026     | -0.0017  | -1.10406           |
| 12          | 0.00073     | -0.00063 | -0.41146           |
| 13          | 0.0007      | 0.00099  | 0.64111            |
| 14          | 0.00015     | 0.0005   | 0.3271             |
| 15          | -0.00007    | 0.0003   | 0.19399            |
| 16          | -0.00014    | -0.00114 | -0.74253           |
| 17          | 0.00028     | 0.00167  | 1.08786            |
| 18          | -0.00036    | 0.00037  | 0.24293            |
| 19          | -0.00037    | -0.00125 | -0.81138           |

3<sup>rd</sup> run:

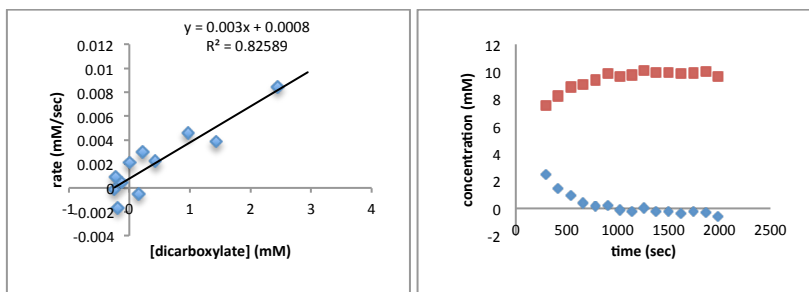

**Linear Regression**

**Regression Statistics**

|                              |         |
|------------------------------|---------|
| R                            | 0.90878 |
| R Square                     | 0.82589 |
| Adjusted R Square            | 0.80654 |
| S                            | 0.00124 |
| Total number of observations | 11      |

**0.03113158475814 = 0.0008 + 0.0030 \* 11.8**

**ANOVA**

|            | d.f. | SS      | MS      | F        | p-level |
|------------|------|---------|---------|----------|---------|
| Regression | 1.   | 0.00007 | 0.00007 | 42.69093 | 0.00011 |
| Residual   | 9.   | 0.00001 | 0.      |          |         |
| Total      | 10.  | 0.00008 |         |          |         |

|           | Coefficients | Standard Error | LCL      | UCL     | t Stat  |
|-----------|--------------|----------------|----------|---------|---------|
| Intercept | 0.00078      | 0.00043        | -0.00001 | 0.00156 | 1.8163  |
| 11.8      | 0.00302      | 0.00046        | 0.00217  | 0.00386 | 6.53383 |

T (10%) 1.83311  
 LCL - Lower value of a reliable interval (LCL)  
 UCL - Upper value of a reliable interval (UCL)

**Residuals**

| Observation | Predicted Y | Residual | Standard Residuals |
|-------------|-------------|----------|--------------------|
| 1           | 0.00815     | 0.00026  | 0.219              |
| 2           | 0.00511     | -0.00125 | -1.05974           |
| 3           | 0.00371     | 0.00085  | 0.71817            |
| 4           | 0.00206     | 0.00018  | 0.14905            |
| 5           | 0.00125     | -0.00177 | -1.49942           |
| 6           | 0.00144     | 0.00151  | 1.2802             |
| 7           | 0.00037     | 0.00011  | 0.09369            |
| 8           | 0.0002      | -0.0019  | -1.60634           |
| 9           | 0.00081     | 0.00132  | 1.12209            |
| 10          | 0.00004     | -0.00017 | -0.14741           |
| 11          | 0.00009     | 0.00086  | 0.7307             |

**X = Me (S2)**

| run     | $k$ (sec <sup>-1</sup> ) |
|---------|--------------------------|
| 1       | 1.4(1)x10 <sup>-3</sup>  |
| 2       | 1.28(7)x10 <sup>-3</sup> |
| 3       | 1.2(1)x10 <sup>-3</sup>  |
| average | 1.3(1)x10 <sup>-3</sup>  |

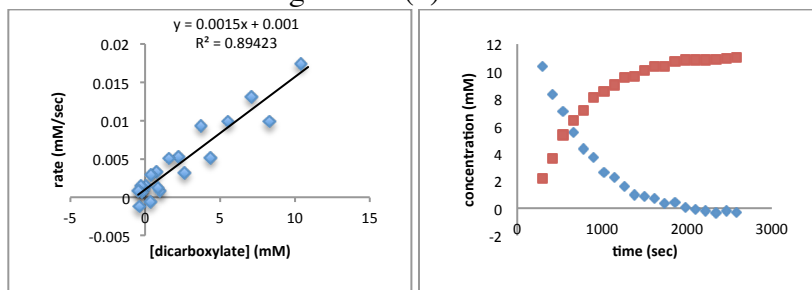

1<sup>st</sup> run:

**Linear Regression**

**Regression Statistics**

|                              |         |
|------------------------------|---------|
| R                            | 0.94564 |
| R Square                     | 0.89423 |
| Adjusted R Square            | 0.88866 |
| S                            | 0.00164 |
| Total number of observations | 21      |

**0.00470653635742 = 0.0010 + 0.0015 \* 11.8**

**ANOVA**

|            | d.f. | SS      | MS      | F         | p-level |
|------------|------|---------|---------|-----------|---------|
| Regression | 1.   | 0.00043 | 0.00043 | 160.63649 | 0.      |
| Residual   | 19.  | 0.00005 | 0.      |           |         |
| Total      | 20.  | 0.00048 |         |           |         |

|                                                | Coefficients | Standard Error | LCL     | UCL     | t Stat   |
|------------------------------------------------|--------------|----------------|---------|---------|----------|
| Intercept                                      | 0.00101      | 0.00044        | 0.00024 | 0.00178 | 2.27422  |
| 11.8                                           | 0.00147      | 0.00012        | 0.00127 | 0.00167 | 12.67425 |
| T (10%)                                        | 1.72913      |                |         |         |          |
| LCL - Lower value of a reliable interval (LCL) |              |                |         |         |          |
| UCL - Upper value of a reliable interval (UCL) |              |                |         |         |          |

**Residuals**

| Observation | Predicted Y | Residual | Standard Residuals |
|-------------|-------------|----------|--------------------|
| 1           | 0.01627     | 0.00119  | 0.74156            |
| 2           | 0.01319     | -0.00332 | -2.07509           |
| 3           | 0.01145     | 0.0016   | 0.99916            |
| 4           | 0.00915     | 0.00075  | 0.467              |
| 5           | 0.00741     | -0.00225 | -1.40847           |
| 6           | 0.0065      | 0.00283  | 1.77057            |
| 7           | 0.00485     | -0.00161 | -1.00452           |
| 8           | 0.00428     | 0.00102  | 0.63743            |
| 9           | 0.00335     | 0.0017   | 1.06642            |
| 10          | 0.00245     | -0.00167 | -1.04197           |
| 11          | 0.00232     | -0.00112 | -0.70293           |
| 12          | 0.00211     | 0.00123  | 0.77203            |
| 13          | 0.00152     | -0.00212 | -1.3242            |
| 14          | 0.00162     | 0.0013   | 0.81148            |
| 15          | 0.00111     | 0.00035  | 0.21836            |
| 16          | 0.00085     | 0.00007  | 0.04377            |
| 17          | 0.00069     | 0.00045  | 0.28246            |
| 18          | 0.00049     | -0.00171 | -1.07011           |
| 19          | 0.0007      | -0.00004 | -0.0271            |
| 20          | 0.00059     | 0.00089  | 0.55799            |
| 21          | 0.00033     | 0.00046  | 0.28616            |

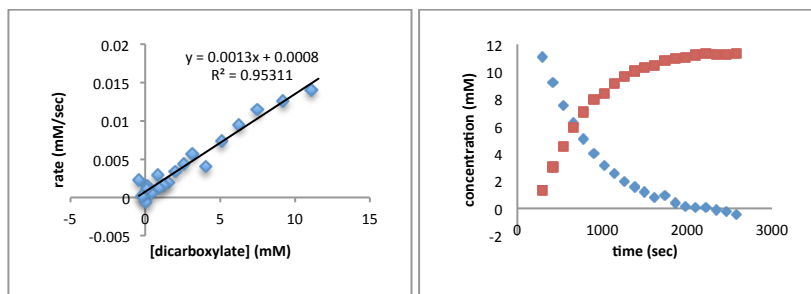

2<sup>nd</sup> run:

**Linear Regression**

**Regression Statistics**

|                              |         |
|------------------------------|---------|
| R                            | 0.97628 |
| R Square                     | 0.95311 |
| Adjusted R Square            | 0.95051 |
| S                            | 0.00099 |
| Total number of observations | 20      |

**0.00441477332771 = 0.0008 + 0.0013 \* 11.8**

**ANOVA**

|            | d.f. | SS      | MS      | F         | p-level     |
|------------|------|---------|---------|-----------|-------------|
| Regression | 1.   | 0.00036 | 0.00036 | 365.90819 | 2.07501E-13 |
| Residual   | 18.  | 0.00002 | 0.      |           |             |
| Total      | 19.  | 0.00037 |         |           |             |

|                  | Coefficients | Standard Error | LCL     | UCL     | t Stat   |
|------------------|--------------|----------------|---------|---------|----------|
| <b>Intercept</b> | 0.00075      | 0.00029        | 0.00025 | 0.00125 | 2.61122  |
| <b>11.8</b>      | 0.00128      | 0.00007        | 0.00116 | 0.00139 | 19.12873 |

T (10%) 1.73406  
 LCL - Lower value of a reliable interval (LCL)  
 UCL - Upper value of a reliable interval (UCL)

**Residuals**

| Observation | Predicted Y | Residual | Standard Residuals |
|-------------|-------------|----------|--------------------|
| 1           | 0.01487     | -0.00081 | -0.84372           |
| 2           | 0.01248     | 0.00012  | 0.12139            |
| 3           | 0.01033     | 0.00113  | 1.17758            |
| 4           | 0.00874     | 0.00078  | 0.80978            |
| 5           | 0.00724     | 0.00012  | 0.13015            |
| 6           | 0.00587     | -0.00184 | -1.91516           |
| 7           | 0.00476     | 0.00092  | 0.95968            |
| 8           | 0.00401     | 0.00036  | 0.37498            |
| 9           | 0.00331     | 0.00006  | 0.06515            |
| 10          | 0.00275     | -0.00078 | -0.81209           |
| 11          | 0.00227     | -0.00063 | -0.65345           |
| 12          | 0.00179     | 0.0012   | 1.24848            |
| 13          | 0.00189     | -0.0007  | -0.73341           |
| 14          | 0.00125     | -0.00066 | -0.69102           |
| 15          | 0.00091     | 0.00058  | 0.60106            |
| 16          | 0.00087     | 0.00022  | 0.22834            |
| 17          | 0.00085     | -0.00148 | -1.54239           |
| 18          | 0.00058     | -0.00047 | -0.49463           |
| 19          | 0.00044     | -0.0002  | -0.20776           |
| 20          | 0.00021     | 0.00209  | 2.17705            |



3<sup>rd</sup> run:

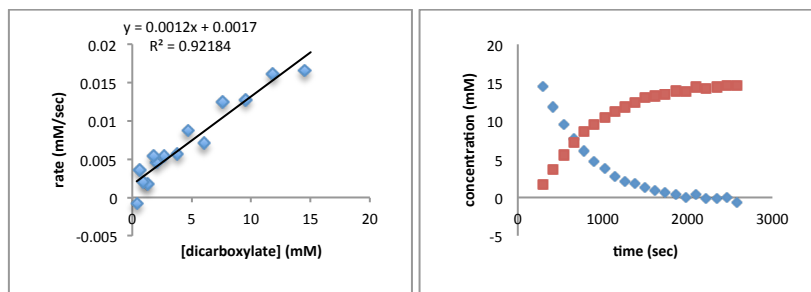

### Linear Regression

#### Regression Statistics

|                              |         |
|------------------------------|---------|
| R                            | 0.96012 |
| R Square                     | 0.92184 |
| Adjusted R Square            | 0.91532 |
| S                            | 0.00157 |
| Total number of observations | 14      |

$$0.00556450964153 = 0.0017 + 0.0012 * 11.8$$

#### ANOVA

|            | d.f. | SS      | MS      | F         | p-level |
|------------|------|---------|---------|-----------|---------|
| Regression | 1.   | 0.00035 | 0.00035 | 141.52606 | 0.      |
| Residual   | 12.  | 0.00003 | 0.      |           |         |
| Total      | 13.  | 0.00038 |         |           |         |

|                                                | Coefficients | Standard Error | LCL     | UCL     | t Stat   |
|------------------------------------------------|--------------|----------------|---------|---------|----------|
| Intercept                                      | 0.00168      | 0.00063        | 0.00056 | 0.0028  | 2.67304  |
| 11.8                                           | 0.00115      | 0.0001         | 0.00098 | 0.00132 | 11.89647 |
| T (10%)                                        | 1.78229      |                |         |         |          |
| LCL - Lower value of a reliable interval (LCL) |              |                |         |         |          |
| UCL - Upper value of a reliable interval (UCL) |              |                |         |         |          |

#### Residuals

| Observation | Predicted Y | Residual | Standard Residuals |
|-------------|-------------|----------|--------------------|
| 1           | 0.01839     | -0.00181 | -1.20212           |
| 2           | 0.01527     | 0.00085  | 0.56481            |
| 3           | 0.01268     | 0.00009  | 0.06158            |
| 4           | 0.01046     | 0.00205  | 1.35836            |
| 5           | 0.00865     | -0.00162 | -1.07465           |
| 6           | 0.00709     | 0.00168  | 1.11263            |
| 7           | 0.00601     | -0.00031 | -0.20658           |
| 8           | 0.00477     | 0.0006   | 0.397              |
| 9           | 0.00403     | 0.00049  | 0.32557            |
| 10          | 0.00371     | 0.00171  | 1.13319            |
| 11          | 0.00318     | -0.00143 | -0.95079           |
| 12          | 0.00272     | -0.00067 | -0.44538           |
| 13          | 0.00238     | 0.00125  | 0.82794            |
| 14          | 0.00211     | -0.00286 | -1.90155           |

**X = Cl (S3)**

| run     | $k$ (sec <sup>-1</sup> ) |
|---------|--------------------------|
| 1       | 2.4(2)x10 <sup>-3</sup>  |
| 2       | 2.4(2)x10 <sup>-3</sup>  |
| 3       | 2.2(2)x10 <sup>-3</sup>  |
| average | 2.3(2)x10 <sup>-3</sup>  |

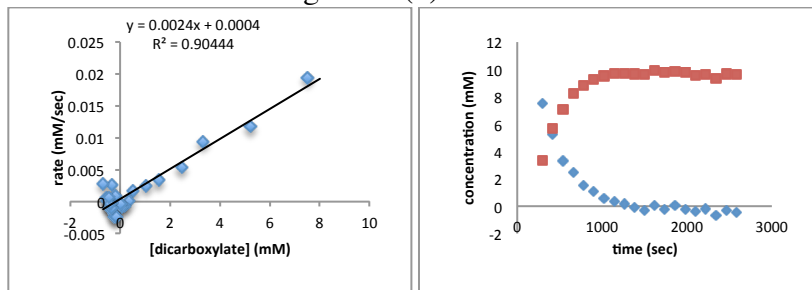

1<sup>st</sup> run:

**Linear Regression**

**Regression Statistics**

|                              |         |
|------------------------------|---------|
| R                            | 0.95102 |
| R Square                     | 0.90444 |
| Adjusted R Square            | 0.90091 |
| S                            | 0.00146 |
| Total number of observations | 29      |

$$0.01113203615226 = 0.0004 + 0.0024 * 11.8$$

**ANOVA**

|            | d.f. | SS      | MS      | F         | p-level     |
|------------|------|---------|---------|-----------|-------------|
| Regression | 1.   | 0.00054 | 0.00054 | 255.55869 | 2.77556E-15 |
| Residual   | 27.  | 0.00006 | 0.      |           |             |
| Total      | 28.  | 0.0006  |         |           |             |

|           | Coefficients | Standard Error | LCL      | UCL     | t Stat  |
|-----------|--------------|----------------|----------|---------|---------|
| Intercept | 0.00041      | 0.00028        | -0.00008 | 0.00089 | 1.4361  |
| 11.8      | 0.00235      | 0.00015        | 0.0021   | 0.0026  | 15.9862 |

T (10%) 1.70329  
 LCL - Lower value of a reliable interval (LCL)  
 UCL - Upper value of a reliable interval (UCL)

**Residuals**

| Observation | Predicted Y | Residual | Standard Residuals |
|-------------|-------------|----------|--------------------|
| 1           | 0.01807     | 0.00133  | 0.92871            |
| 2           | 0.0127      | -0.00093 | -0.65023           |
| 3           | 0.00822     | 0.00113  | 0.78664            |
| 4           | 0.00619     | -0.00086 | -0.60297           |
| 5           | 0.00402     | -0.00067 | -0.47025           |
| 6           | 0.00284     | -0.0004  | -0.27557           |
| 7           | 0.00166     | -0.00006 | -0.04071           |
| 8           | 0.00124     | -0.00121 | -0.84513           |
| 9           | 0.00077     | -0.00149 | -1.03998           |
| 10          | 0.00016     | -0.00054 | -0.37928           |
| 11          | -0.00034    | 0.00285  | 1.98804            |
| 12          | 0.00056     | -0.00137 | -0.95737           |
| 13          | -0.0002     | 0.00064  | 0.44302            |
| 14          | 0.00042     | -0.00073 | -0.51053           |
| 15          | -0.00017    | -0.00179 | -1.2507            |
| 16          | -0.00049    | 0.00083  | 0.58068            |
| 17          | -0.00008    | -0.00232 | -1.61652           |
| 18          | -0.00119    | 0.00394  | 2.74702            |
| 19          | -0.00034    | 0.00012  | 0.08028            |
| 20          | -0.00063    | -0.00036 | -0.25393           |
| 21          | -0.00053    | 0.00001  | 0.00565            |
| 22          | -0.00007    | 0.00106  | 0.73689            |
| 23          | -0.00034    | 0.00006  | 0.0389             |
| 24          | 0.00004     | -0.00254 | -1.77257           |
| 25          | -0.00088    | 0.00142  | 0.9924             |
| 26          | -0.00042    | -0.0005  | -0.34895           |
| 27          | -0.00078    | 0.00092  | 0.64406            |
| 28          | -0.00054    | 0.00021  | 0.14356            |
| 29          | -0.00064    | 0.00129  | 0.89884            |

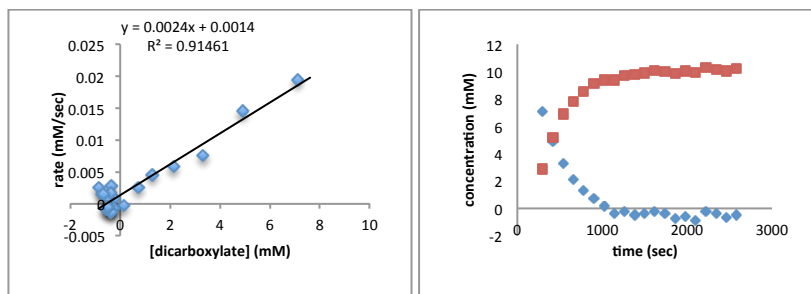

2<sup>nd</sup> run:

**Linear Regression**

**Regression Statistics**

|                              |         |
|------------------------------|---------|
| R                            | 0.95635 |
| R Square                     | 0.91461 |
| Adjusted R Square            | 0.91012 |
| S                            | 0.00159 |
| Total number of observations | 21      |

**0.00953817430763 = 0.0014 + 0.0024 \* 11.8**

**ANOVA**

|            | d.f. | SS      | MS      | F         | p-level     |
|------------|------|---------|---------|-----------|-------------|
| Regression | 1.   | 0.00051 | 0.00051 | 203.51798 | 1.32591E-11 |
| Residual   | 19.  | 0.00005 | 0.      |           |             |
| Total      | 20.  | 0.00056 |         |           |             |

|                  | Coefficients | Standard Error | LCL     | UCL     | t Stat   |
|------------------|--------------|----------------|---------|---------|----------|
| <b>Intercept</b> | 0.00136      | 0.00036        | 0.00074 | 0.00199 | 3.76511  |
| <b>11.8</b>      | 0.00242      | 0.00017        | 0.00213 | 0.00271 | 14.26597 |

T (10%) 1.72913  
 LCL - Lower value of a reliable interval (LCL)  
 UCL - Upper value of a reliable interval (UCL)

**Residuals**

| Observation | Predicted Y | Residual | Standard Residuals |
|-------------|-------------|----------|--------------------|
| 1           | 0.01857     | 0.00084  | 0.54036            |
| 2           | 0.01321     | 0.00123  | 0.79317            |
| 3           | 0.00938     | -0.00177 | -1.14557           |
| 4           | 0.00655     | -0.00065 | -0.42068           |
| 5           | 0.00447     | 0.0001   | 0.06428            |
| 6           | 0.00315     | -0.0006  | -0.38886           |
| 7           | 0.00172     | -0.00199 | -1.2875            |
| 8           | 0.00051     | 0.00228  | 1.46974            |
| 9           | 0.00081     | 0.00002  | 0.01585            |
| 10          | 0.00013     | 0.00071  | 0.4613             |
| 11          | 0.00048     | 0.00124  | 0.80063            |
| 12          | 0.00077     | -0.00165 | -1.06344           |
| 13          | 0.0004      | -0.00167 | -1.07885           |
| 14          | -0.00042    | 0.00201  | 1.29909            |
| 15          | -0.00002    | -0.00083 | -0.5335            |
| 16          | -0.00074    | 0.00333  | 2.1484             |
| 17          | 0.0007      | -0.00132 | -0.85493           |
| 18          | 0.0005      | -0.00178 | -1.15176           |
| 19          | -0.00031    | 0.00186  | 1.20034            |
| 20          | 0.00021     | -0.00075 | -0.48239           |
| 21          | 0.00015     | -0.0006  | -0.38567           |

3<sup>rd</sup> run:

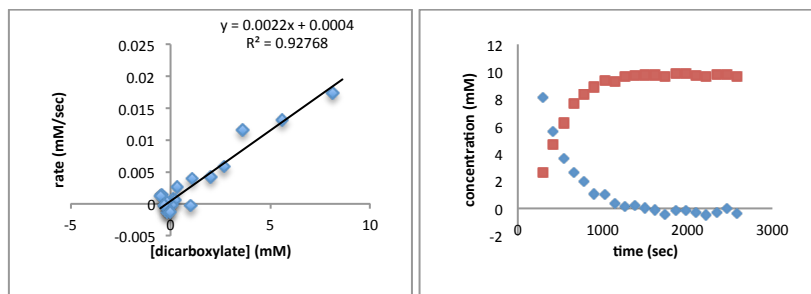

**Linear Regression**

**Regression Statistics**

|                              |         |
|------------------------------|---------|
| R                            | 0.96316 |
| R Square                     | 0.92768 |
| Adjusted R Square            | 0.92343 |
| S                            | 0.00148 |
| Total number of observations | 19      |

$$0.00862176160748 = 0.0004 + 0.0022 * 11.8$$

**ANOVA**

|            | d.f. | SS      | MS      | F         | p-level     |
|------------|------|---------|---------|-----------|-------------|
| Regression | 1.   | 0.00048 | 0.00048 | 218.07088 | 3.96728E-11 |
| Residual   | 17.  | 0.00004 | 0.      |           |             |
| Total      | 18.  | 0.00051 |         |           |             |

|           | Coefficients | Standard Error | LCL      | UCL     | t Stat   |
|-----------|--------------|----------------|----------|---------|----------|
| Intercept | 0.00044      | 0.00038        | -0.00023 | 0.00111 | 1.14285  |
| 11.8      | 0.00221      | 0.00015        | 0.00195  | 0.00247 | 14.76722 |
| T (10%)   | 1.73961      |                |          |         |          |

LCL - Lower value of a reliable interval (LCL)  
 UCL - Upper value of a reliable interval (UCL)

**Residuals**

| Observation | Predicted Y | Residual | Standard Residuals |
|-------------|-------------|----------|--------------------|
| 1           | 0.0184      | -0.00097 | -0.67782           |
| 2           | 0.01285     | 0.00031  | 0.21885            |
| 3           | 0.00843     | 0.00313  | 2.17882            |
| 4           | 0.00634     | -0.00044 | -0.30826           |
| 5           | 0.00489     | -0.00061 | -0.42653           |
| 6           | 0.00281     | 0.00116  | 0.80453            |
| 7           | 0.00263     | -0.00291 | -2.02758           |
| 8           | 0.00121     | 0.0014   | 0.97277            |
| 9           | 0.00074     | 0.00009  | 0.06391            |
| 10          | 0.00096     | -0.00045 | -0.31498           |
| 11          | 0.00051     | -0.00067 | -0.46775           |
| 12          | 0.00017     | -0.00099 | -0.69098           |
| 13          | -0.00054    | 0.00196  | 1.3628             |
| 14          | 0.00004     | 0.00019  | 0.13515            |
| 15          | 0.00006     | -0.00139 | -0.96912           |
| 16          | -0.00024    | -0.0001  | -0.07024           |
| 17          | -0.00069    | 0.00194  | 1.34813            |
| 18          | -0.00022    | 0.00003  | 0.02017            |
| 19          | 0.00039     | -0.00165 | -1.15186           |

## Hammett Plots

| Benzoate | $\sigma$ -para | $\sigma$ -meta | k (exp.) | log (kX/kH) |
|----------|----------------|----------------|----------|-------------|
| Cl       | 0.227          | 0.373          | 0.0023   | 0.158       |
| H        | 0              | 0              | 0.0016   | 0           |
| OMe      | -0.27          | 0.115          | 0.0028   | 0.243       |
| Me       | -0.17          | -0.069         | 0.0013   | -0.0901     |

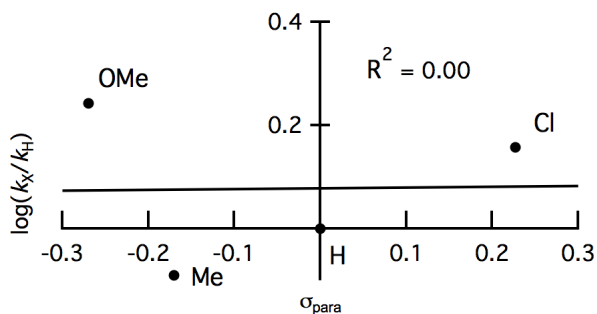

### Linear Regression

#### Regression Statistics

|                              |         |
|------------------------------|---------|
| R                            | 0.68908 |
| R Square                     | 0.47483 |
| Adjusted R Square            | 0.21224 |
| S                            | 0.13357 |
| Total number of observations | 4       |

$$\log(kX/kH) = 0.0217 + 0.5338 * \sigma\text{-meta}$$

#### ANOVA

|            | d.f. | SS      | MS      | F       | p-level |
|------------|------|---------|---------|---------|---------|
| Regression | 1.   | 0.03226 | 0.03226 | 1.80828 | 0.31092 |
| Residual   | 2.   | 0.03568 | 0.01784 |         |         |
| Total      | 3.   | 0.06794 |         |         |         |

|                | Coefficients | Standard Error | LCL      | UCL     | t Stat  |
|----------------|--------------|----------------|----------|---------|---------|
| Intercept      | 0.0217       | 0.07867        | -0.20801 | 0.25142 | 0.27588 |
| $\sigma$ -meta | 0.53378      | 0.39695        | -0.6253  | 1.69287 | 1.34472 |

T (10%) 2.91999  
 LCL - Lower value of a reliable interval (LCL)  
 UCL - Upper value of a reliable interval (UCL)

#### Residuals

| Observation | Predicted Y | Residual | Standard Residuals |
|-------------|-------------|----------|--------------------|
| 1           | 0.22081     | -0.0632  | -0.57948           |
| 2           | 0.0217      | -0.0217  | -0.19901           |
| 3           | 0.08309     | 0.15995  | 1.46664            |
| 4           | -0.01513    | -0.07505 | -0.68815           |

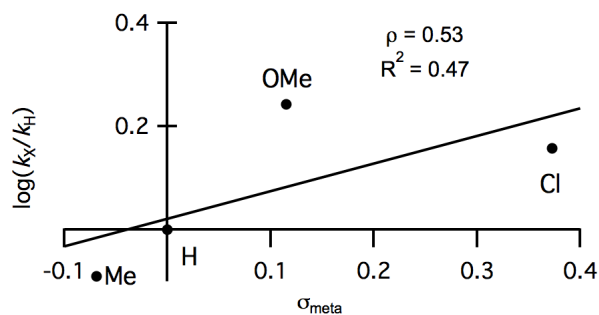

| Linear Regression                                     |                     |                       |                 |                           |                |
|-------------------------------------------------------|---------------------|-----------------------|-----------------|---------------------------|----------------|
| <b>Regression Statistics</b>                          |                     |                       |                 |                           |                |
| R                                                     |                     | 0.68908               |                 |                           |                |
| R Square                                              |                     | 0.47483               |                 |                           |                |
| Adjusted R Square                                     |                     | 0.21224               |                 |                           |                |
| S                                                     |                     | 0.13357               |                 |                           |                |
| Total number of observations                          |                     | 4                     |                 |                           |                |
| <b>log (kX/kH) = 0.0217 + 0.5338 * ?-meta</b>         |                     |                       |                 |                           |                |
| <b>ANOVA</b>                                          |                     |                       |                 |                           |                |
|                                                       | <i>d.f.</i>         | <i>SS</i>             | <i>MS</i>       | <i>F</i>                  | <i>p-level</i> |
| Regression                                            | 1.                  | 0.03226               | 0.03226         | 1.80828                   | 0.31092        |
| Residual                                              | 2.                  | 0.03568               | 0.01784         |                           |                |
| Total                                                 | 3.                  | 0.06794               |                 |                           |                |
| <b>Coefficients</b>                                   |                     |                       |                 |                           |                |
|                                                       | <i>Coefficients</i> | <i>Standard Error</i> | <i>LCL</i>      | <i>UCL</i>                | <i>t Stat</i>  |
| Intercept                                             | 0.0217              | 0.07867               | -0.20801        | 0.25142                   | 0.27588        |
| ?-meta                                                | 0.53378             | 0.39695               | -0.6253         | 1.69287                   | 1.34472        |
| T (10%)                                               | 2.91999             |                       |                 |                           |                |
| <i>LCL - Lower value of a reliable interval (LCL)</i> |                     |                       |                 |                           |                |
| <i>UCL - Upper value of a reliable interval (UCL)</i> |                     |                       |                 |                           |                |
| <b>Residuals</b>                                      |                     |                       |                 |                           |                |
|                                                       | <i>Observation</i>  | <i>Predicted Y</i>    | <i>Residual</i> | <i>Standard Residuals</i> |                |
|                                                       | 1                   | 0.22081               | -0.0632         | -0.57948                  |                |
|                                                       | 2                   | 0.0217                | -0.0217         | -0.19901                  |                |
|                                                       | 3                   | 0.08309               | 0.15995         | 1.46664                   |                |
|                                                       | 4                   | -0.01513              | -0.07505        | -0.68815                  |                |

## Cyclometalation of Deuterated Complex 7a-d<sub>6</sub>

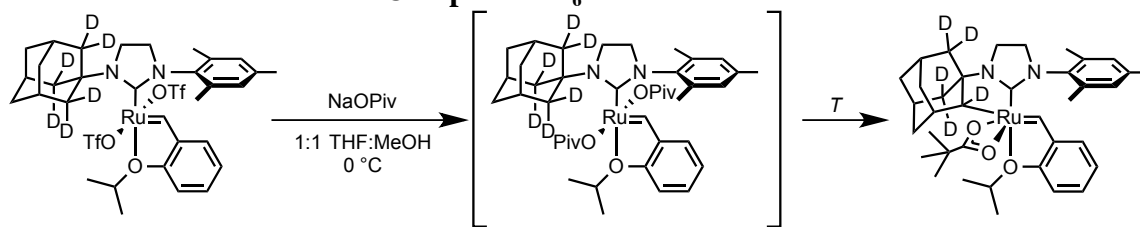

25 °C

| run     | $k$ (sec <sup>-1</sup> ) |
|---------|--------------------------|
| 1       | 3.4(1)x10 <sup>-5</sup>  |
| 2       | 3.2(1)x10 <sup>-5</sup>  |
| 3       | 4.0(1)x10 <sup>-5</sup>  |
| average | 3.5(1)x10 <sup>-5</sup>  |

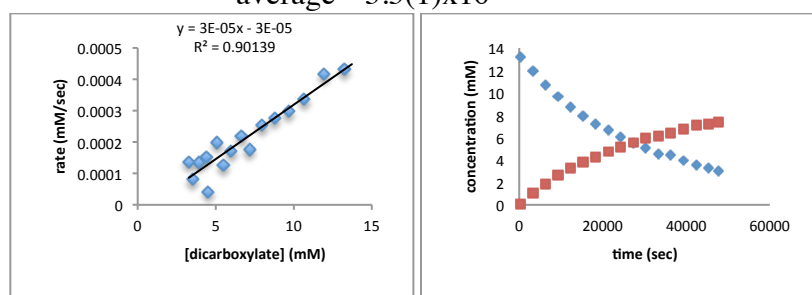

1<sup>st</sup> run:

### Linear Regression

#### Regression Statistics

|                              |         |
|------------------------------|---------|
| R                            | 0.96708 |
| R Square                     | 0.93524 |
| Adjusted R Square            | 0.93062 |
| S                            | 0.00002 |
| Total number of observations | 16      |

$$0.00023539141253 = 0.0003 - 0.0000 * 0$$

#### ANOVA

|            | d.f. | SS | MS | F            | p-level |
|------------|------|----|----|--------------|---------|
| Regression | 1.   | 0. |    | 0. 202.19673 | 0.      |
| Residual   | 14.  | 0. |    | 0.           |         |
| Total      | 15.  | 0. |    |              |         |

|           | Coefficients | Standard Error | LCL      | UCL      | t Stat    |
|-----------|--------------|----------------|----------|----------|-----------|
| Intercept | 0.00031      | 0.00001        | 0.00029  | 0.00033  | 25.47977  |
| 0         | -0.00003     | 0.             | -0.00004 | -0.00003 | -14.21959 |

T (10%) 1.76131  
 LCL - Lower value of a reliable interval (LCL)  
 UCL - Upper value of a reliable interval (UCL)

#### Residuals

| Observation | Predicted Y | Residual | Standard Residuals |
|-------------|-------------|----------|--------------------|
| 1           | 0.00031     | 0.00002  | 0.90409            |
| 2           | 0.00027     | 0.       | -0.21394           |
| 3           | 0.00024     | 0.00001  | 0.65107            |
| 4           | 0.00022     | -0.00001 | -0.40677           |
| 5           | 0.0002      | -0.00002 | -1.21645           |
| 6           | 0.00018     | 0.       | -0.16116           |
| 7           | 0.00016     | -0.00001 | -0.65971           |
| 8           | 0.00014     | 0.       | -0.0603            |
| 9           | 0.00013     | 0.       | 0.23918            |
| 10          | 0.00012     | 0.00002  | 1.00067            |
| 11          | 0.0001      | -0.00005 | -2.43082           |
| 12          | 0.0001      | 0.       | 0.24139            |
| 13          | 0.00009     | 0.00001  | 0.56114            |
| 14          | 0.00008     | 0.00004  | 1.97055            |
| 15          | 0.00006     | -0.00001 | -0.59125           |
| 16          | 0.00006     | 0.       | 0.17233            |

2<sup>nd</sup> run:

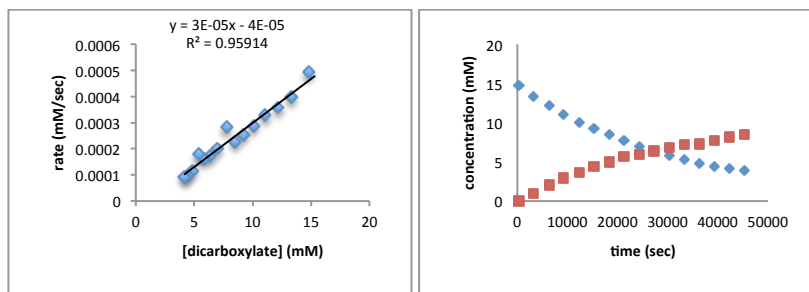

**Linear Regression**

**Regression Statistics**

|                              |         |
|------------------------------|---------|
| R                            | 0.97936 |
| R Square                     | 0.95914 |
| Adjusted R Square            | 0.956   |
| S                            | 0.00002 |
| Total number of observations | 15      |

**-0.00135064484445 = - 0.0000 + 0.0000 \* 14.4**

**ANOVA**

|            | d.f. | SS | MS | F         | p-level |
|------------|------|----|----|-----------|---------|
| Regression | 1.   | 0. | 0. | 305.18577 | 0.      |
| Residual   | 13.  | 0. | 0. |           |         |
| Total      | 14.  | 0. |    |           |         |

|                  | Coefficients | Standard Error | LCL      | UCL      | t Stat   |
|------------------|--------------|----------------|----------|----------|----------|
| <b>Intercept</b> | -0.00004     | 0.00002        | -0.00007 | -0.00001 | -2.21616 |
| <b>14.4</b>      | 0.00003      | 0.             | 0.00003  | 0.00004  | 17.46957 |

T (10%) 1.77093  
 LCL - Lower value of a reliable interval (LCL)  
 UCL - Upper value of a reliable interval (UCL)

**Residuals**

| Observation | Predicted Y | Residual | Standard Residuals |
|-------------|-------------|----------|--------------------|
| 1           | 0.00046     | 0.00003  | 1.30148            |
| 2           | 0.00041     | -0.00002 | -0.64689           |
| 3           | 0.00037     | -0.00001 | -0.57125           |
| 4           | 0.00033     | -0.00001 | -0.3042            |
| 5           | 0.0003      | -0.00001 | -0.63754           |
| 6           | 0.00027     | -0.00002 | -0.84015           |
| 7           | 0.00025     | -0.00002 | -0.92853           |
| 8           | 0.00022     | 0.00006  | 2.41643            |
| 9           | 0.0002      | 0.00001  | 0.24409            |
| 10          | 0.00018     | 0.       | -0.15521           |
| 11          | 0.00016     | 0.       | 0.13973            |
| 12          | 0.00014     | 0.00004  | 1.61325            |
| 13          | 0.00012     | -0.00001 | -0.39152           |
| 14          | 0.00011     | -0.00002 | -0.73763           |
| 15          | 0.0001      | -0.00001 | -0.50205           |



3<sup>rd</sup> run:

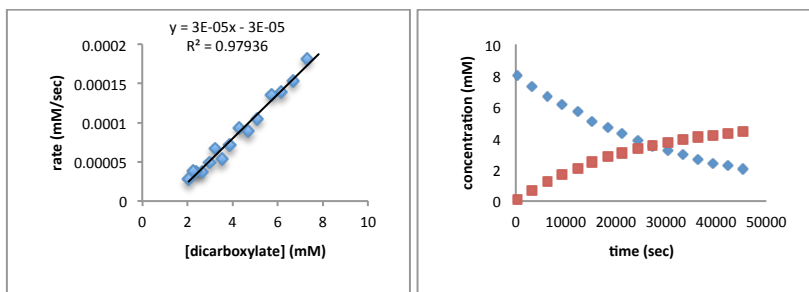

**Linear Regression**

**Regression Statistics**

|                              |         |
|------------------------------|---------|
| R                            | 0.99108 |
| R Square                     | 0.98225 |
| Adjusted R Square            | 0.98088 |
| S                            | 0.00001 |
| Total number of observations | 15      |

**0.00019583957553 = 0.0002 - 0.0000 \* 0.08232110580365**

**ANOVA**

|            | d.f. | SS | MS          | F        | p-level     |
|------------|------|----|-------------|----------|-------------|
| Regression | 1.   | 0. | 0.          | 719.2411 | 9.12825E-13 |
| Residual   | 13.  | 0. | 4.45975E-11 |          |             |
| Total      | 14.  | 0. |             |          |             |

|                         | Coefficients | Standard Error | LCL      | UCL      | t Stat    |
|-------------------------|--------------|----------------|----------|----------|-----------|
| Intercept               | 0.00021      | 0.             | 0.0002   | 0.00022  | 42.49205  |
| <b>0.08232110580365</b> | -0.00004     | 0.             | -0.00004 | -0.00004 | -26.81867 |
| T (10%)                 | 1.77093      |                |          |          |           |

LCL - Lower value of a reliable interval (LCL)  
 UCL - Upper value of a reliable interval (UCL)

**Residuals**

| Observation | Predicted Y | Residual | Standard Residuals |
|-------------|-------------|----------|--------------------|
| 1           | 0.00018     | 0.       | 0.02686            |
| 2           | 0.00016     | -0.00001 | -0.83522           |
| 3           | 0.00014     | 0.       | -0.26884           |
| 4           | 0.00012     | 0.00001  | 1.89604            |
| 5           | 0.00011     | 0.       | -0.41895           |
| 6           | 0.00009     | -0.00001 | -0.86704           |
| 7           | 0.00008     | 0.00001  | 1.45192            |
| 8           | 0.00007     | 0.       | -0.22005           |
| 9           | 0.00006     | -0.00001 | -1.61337           |
| 10          | 0.00006     | 0.00001  | 1.52614            |
| 11          | 0.00005     | 0.       | -0.01331           |
| 12          | 0.00004     | -0.00001 | -1.01294           |
| 13          | 0.00004     | 0.       | -0.12537           |
| 14          | 0.00003     | 0.       | 0.71886            |
| 15          | 0.00003     | 0.       | -0.24473           |

50 °C

| run     | $k$ (sec <sup>-1</sup> ) |
|---------|--------------------------|
| 1       | 5.8(4)x10 <sup>-4</sup>  |
| 2       | 4.6(4)x10 <sup>-4</sup>  |
| average | 5.2(4)x10 <sup>-4</sup>  |

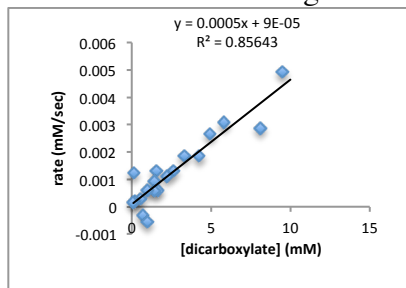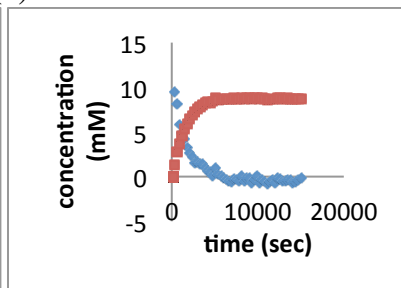

1<sup>st</sup> run:

**Linear Regression**

**Regression Statistics**

|                              |         |
|------------------------------|---------|
| R                            | 0.95071 |
| R Square                     | 0.90385 |
| Adjusted R Square            | 0.89948 |
| S                            | 0.00065 |
| Total number of observations | 24      |

$$0.00785104262657 = -0.0001 + 0.0006 * 14.4$$

**ANOVA**

|            | d.f. | SS      | MS      | F         | p-level     |
|------------|------|---------|---------|-----------|-------------|
| Regression | 1.   | 0.00009 | 0.00009 | 206.81299 | 1.14342E-12 |
| Residual   | 22.  | 0.00001 | 0.      |           |             |
| Total      | 23.  | 0.0001  |         |           |             |

|           | Coefficients | Standard Error | LCL      | UCL     | t Stat   |
|-----------|--------------|----------------|----------|---------|----------|
| Intercept | -0.00008     | 0.00018        | -0.00039 | 0.00022 | -0.47302 |
| 14.4      | 0.00058      | 0.00004        | 0.00051  | 0.00065 | 14.38099 |

T (10%)

LCL - Lower value of a reliable interval (LCL)

UCL - Upper value of a reliable interval (UCL)

**Residuals**

| Observation | Predicted Y | Residual | Standard Residuals |
|-------------|-------------|----------|--------------------|
| 1           | 0.00688     | 0.00027  | 0.4224             |
| 2           | 0.00564     | -0.00098 | -1.54085           |
| 3           | 0.00483     | 0.00069  | 1.07884            |
| 4           | 0.00387     | -0.00016 | -0.24603           |
| 5           | 0.00323     | 0.00077  | 1.2029             |
| 6           | 0.00254     | -0.0008  | -1.26284           |
| 7           | 0.00224     | -0.00021 | -0.33646           |
| 8           | 0.00188     | -0.00034 | -0.53136           |
| 9           | 0.00162     | 0.00007  | 0.11325            |
| 10          | 0.00132     | 0.00055  | 0.85657            |
| 11          | 0.001       | 0.00023  | 0.35808            |
| 12          | 0.00079     | -0.00003 | -0.04276           |
| 13          | 0.00065     | -0.00033 | -0.51269           |
| 14          | 0.0006      | 0.0007   | 1.09768            |
| 15          | 0.00037     | -0.00031 | -0.48915           |
| 16          | 0.00036     | 0.00026  | 0.41307            |
| 17          | 0.00025     | -0.00106 | -1.6562            |
| 18          | 0.00039     | 0.00169  | 2.64769            |
| 19          | 0.00003     | -0.00012 | -0.18138           |
| 20          | 0.00005     | -0.00033 | -0.51725           |
| 21          | 0.0001      | 0.00028  | 0.44468            |
| 22          | 0.00003     | -0.00007 | -0.10831           |
| 23          | 0.00004     | 0.00026  | 0.4041             |
| 24          | -0.00001    | -0.00103 | -1.61399           |

2<sup>nd</sup> run:

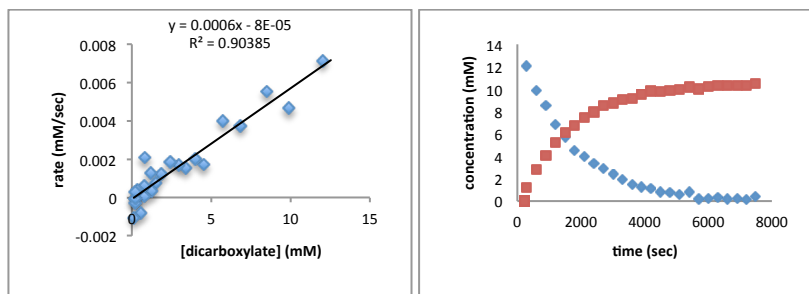

| Linear Regression                                |                     |                       |                           |            |                |
|--------------------------------------------------|---------------------|-----------------------|---------------------------|------------|----------------|
| <b>Regression Statistics</b>                     |                     |                       |                           |            |                |
| R                                                | 0.96834             |                       |                           |            |                |
| R Square                                         | 0.93768             |                       |                           |            |                |
| Adjusted R Square                                | 0.93145             |                       |                           |            |                |
| S                                                | 0.00036             |                       |                           |            |                |
| Total number of observations                     | 12                  |                       |                           |            |                |
| <b>0.01631089658008 = 0.0001 + 0.0005 * 14.4</b> |                     |                       |                           |            |                |
| <b>ANOVA</b>                                     |                     |                       |                           |            |                |
|                                                  | <i>d.f.</i>         | <i>SS</i>             | <i>MS</i>                 | <i>F</i>   | <i>p-level</i> |
| Regression                                       | 1.                  | 0.00002               | 0.00002                   | 150.46546  | 0.             |
| Residual                                         | 10.                 | 0.                    | 0.                        |            |                |
| Total                                            | 11.                 | 0.00002               |                           |            |                |
|                                                  | <i>Coefficients</i> | <i>Standard Error</i> | <i>LCL</i>                | <i>UCL</i> | <i>t Stat</i>  |
| <b>Intercept</b>                                 | 0.00012             | 0.00011               | -0.00009                  | 0.00033    | 1.04386        |
| <b>14.4</b>                                      | 0.00046             | 0.00004               | 0.00039                   | 0.00052    | 12.26644       |
| T (10%)                                          | 1.81246             |                       |                           |            |                |
| LCL - Lower value of a reliable interval (LCL)   |                     |                       |                           |            |                |
| UCL - Upper value of a reliable interval (UCL)   |                     |                       |                           |            |                |
| <b>Residuals</b>                                 |                     |                       |                           |            |                |
| <i>Observation</i>                               | <i>Predicted Y</i>  | <i>Residual</i>       | <i>Standard Residuals</i> |            |                |
| 1                                                | 0.00445             | -0.00006              | -0.16259                  |            |                |
| 2                                                | 0.00205             | 0.0002                | 0.58434                   |            |                |
| 3                                                | 0.00082             | -0.00036              | -1.05117                  |            |                |
| 4                                                | 0.00057             | -0.00057              | -1.64347                  |            |                |
| 5                                                | 0.00057             | 0.00053               | 1.55025                   |            |                |
| 6                                                | -0.00003            | 0.00005               | 0.14151                   |            |                |
| 7                                                | -0.00004            | -0.00012              | -0.33998                  |            |                |
| 8                                                | 0.00004             | -0.00021              | -0.60628                  |            |                |
| 9                                                | 0.00013             | 0.00059               | 1.71864                   |            |                |
| 10                                               | -0.00026            | -0.00029              | -0.85405                  |            |                |
| 11                                               | 0.00004             | 0.00015               | 0.42338                   |            |                |
| 12                                               | -0.00006            | 0.00008               | 0.23941                   |            |                |

## Initiation rate measurements of complexes 4a, and S1–S3

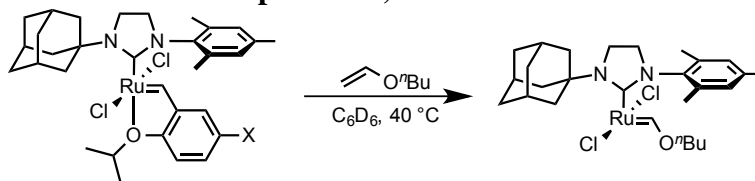

### Typical procedure

A 0.25 mL 0.12 M  $C_6D_6$  solution of dichloride **4a** (0.0031 mmol) was added to an NMR tube followed by an additional 0.45 mL of  $C_6D_6$ . To this green solution was added 12  $\mu$ L (0.093 mmol) of *n*-butylvinylether, the reaction was mixed by inverting multiple times, then inserted into the NMR.  $^1H$  NMR data was collected periodically over  $\sim$ 3 h.

### X = Me (S2)

| run     | $k$ ( $sec^{-1}$ )       |
|---------|--------------------------|
| 1       | $1.58(2) \times 10^{-4}$ |
| 2       | $1.71(2) \times 10^{-4}$ |
| 3       | $1.62(3) \times 10^{-4}$ |
| average | $1.64(2) \times 10^{-4}$ |

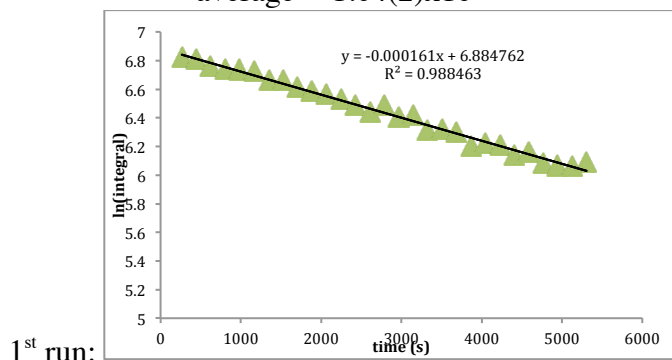

| Linear Regression                              |             |            |                    |             |           |
|------------------------------------------------|-------------|------------|--------------------|-------------|-----------|
| <b>Regression Statistics</b>                   |             |            |                    |             |           |
| R                                              |             | 0.99352    |                    |             |           |
| R Square                                       |             | 0.98708    |                    |             |           |
| Adjusted R Square                              |             | 0.98683    |                    |             |           |
| S                                              |             | 0.05264    |                    |             |           |
| Total number of observations                   |             | 55         |                    |             |           |
| In conc = 1.1624 - 0.0002 * Time (s)           |             |            |                    |             |           |
| <b>ANOVA</b>                                   |             |            |                    |             |           |
|                                                | d.f.        | SS         | MS                 | F           | p-level   |
| Regression                                     | 1.          | 11.21657   | 11.21657           | 4,047.90515 | 0.E+0     |
| Residual                                       | 53.         | 0.14686    | 0.00277            |             |           |
| Total                                          | 54.         | 11.36343   |                    |             |           |
| Coefficients Standard Error LCL UCL T Stat     |             |            |                    |             |           |
| Intercept                                      | 1.1624      | 0.01458    | 1.138              | 1.18681     | 79.74351  |
| Time (s)                                       | -0.000158   | 0.00000248 | -0.00016           | -0.00015    | -63.62315 |
| T (10%) 1.67412                                |             |            |                    |             |           |
| LCL - Lower value of a reliable interval (LCL) |             |            |                    |             |           |
| UCL - Upper value of a reliable interval (UCL) |             |            |                    |             |           |
| <b>Residuals</b>                               |             |            |                    |             |           |
| Observation                                    | Predicted Y | Residual   | Standard Residuals |             |           |
| 1                                              | 1.12052     | -0.00867   | -0.16617           |             |           |
| 2                                              | 1.092       | 0.00424    | 0.08126            |             |           |
| 3                                              | 1.06355     | -0.01483   | -0.28442           |             |           |
| 4                                              | 1.0351      | -0.00531   | -0.10174           |             |           |
| 5                                              | 1.00666     | 0.01729    | 0.33162            |             |           |
| 6                                              | 0.97821     | 0.03208    | 0.61513            |             |           |
| 7                                              | 0.94976     | -0.00192   | -0.03672           |             |           |
| 8                                              | 0.92131     | 0.03       | 0.57531            |             |           |
| 9                                              | 0.89286     | 0.01084    | 0.2078             |             |           |
| 10                                             | 0.86442     | 0.00752    | 0.14416            |             |           |
| 11                                             | 0.83597     | 0.01908    | 0.36589            |             |           |
| 12                                             | 0.80752     | 0.00934    | 0.17907            |             |           |
| 13                                             | 0.77907     | -0.00685   | -0.13132           |             |           |
| 14                                             | 0.75062     | -0.02232   | -0.4279            |             |           |
| 15                                             | 0.72218     | 0.05533    | 1.06095            |             |           |
| 16                                             | 0.69373     | -0.00087   | -0.01669           |             |           |
| 17                                             | 0.66528     | 0.04234    | 0.81183            |             |           |
| 18                                             | 0.63683     | -0.03874   | -0.74286           |             |           |
| 19                                             | 0.60839     | 0.00134    | 0.02572            |             |           |
| 20                                             | 0.57994     | 0.00516    | 0.09889            |             |           |
| 21                                             | 0.55149     | -0.06133   | -1.17612           |             |           |
| 22                                             | 0.52304     | -0.01159   | -0.22218           |             |           |
| 23                                             | 0.4946      | 0.00082    | 0.01579            |             |           |
| 24                                             | 0.46615     | -0.03446   | -0.66069           |             |           |
| 25                                             | 0.4377      | 0.01181    | 0.22654            |             |           |
| 26                                             | 0.40925     | -0.03842   | -0.73672           |             |           |
| 27                                             | 0.38081     | -0.02492   | -0.47791           |             |           |
| 28                                             | 0.35236     | -0.00155   | -0.02972           |             |           |
| 29                                             | 0.32391     | 0.05594    | 1.07271            |             |           |
| 30                                             | 0.29546     | -0.01311   | -0.25137           |             |           |
| 31                                             | 0.26702     | -0.00676   | -0.12958           |             |           |
| 32                                             | 0.23857     | -0.03379   | -0.64803           |             |           |

2<sup>nd</sup> run:

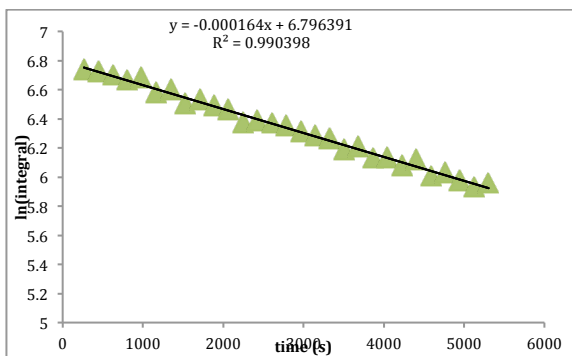

**Linear Regression**

**Regression Statistics**

|                              |         |
|------------------------------|---------|
| R                            | 0.99631 |
| R Square                     | 0.99264 |
| Adjusted R Square            | 0.99247 |
| S                            | 0.03511 |
| Total number of observations | 45      |

**In conc = 1.1842 - 0.0002 \* Time (s)**

**ANOVA**

|            | df. | SS      | MS      |
|------------|-----|---------|---------|
| Regression | 1.  | 7.1475  | 7.1475  |
| Residual   | 43. | 0.05301 | 0.00123 |
| Total      | 44. | 7.20051 |         |

|           | Coefficients | Standard Error | LCL      |
|-----------|--------------|----------------|----------|
| Intercept | 1.18418      | 0.01081        | 1.166    |
| Time (s)  | -0.0001705   | 0.00000224     | -0.00017 |

T (10%) 1.68107

LCL - Lower value of a reliable interval (LCL)

UCL - Upper value of a reliable interval (UCL)

**Residuals**

| Observation | Predicted Y | Residual | Standard Residuals |
|-------------|-------------|----------|--------------------|
| 1           | 1.139       | -0.02714 | -0.78188           |
| 2           | 1.10823     | -0.00895 | -0.25782           |
| 3           | 1.07754     | -0.00254 | -0.07316           |
| 4           | 1.04685     | -0.00582 | -0.16777           |
| 5           | 1.01616     | 0.04198  | 1.2093             |
| 6           | 0.98548     | -0.0279  | -0.80385           |
| 7           | 0.95479     | 0.01813  | 0.5222             |
| 8           | 0.9241      | -0.04394 | -1.26591           |
| 9           | 0.89342     | 0.01041  | 0.29998            |
| 10          | 0.86273     | 0.00166  | 0.04784            |
| 11          | 0.83204     | 0.00475  | 0.13683            |
| 12          | 0.80136     | -0.05115 | -1.47368           |
| 13          | 0.77067     | -0.00654 | -0.18841           |
| 14          | 0.73998     | 0.00745  | 0.21471            |
| 15          | 0.7093      | 0.01924  | 0.55437            |
| 16          | 0.67861     | 0.00486  | 0.14006            |
| 17          | 0.64792     | 0.00905  | 0.2606             |
| 18          | 0.61724     | 0.02166  | 0.62398            |
| 19          | 0.58655     | -0.01893 | -0.54528           |
| 20          | 0.55586     | 0.02567  | 0.73955            |
| 21          | 0.52517     | -0.02283 | -0.65777           |
| 22          | 0.49449     | 0.0163   | 0.46947            |
| 23          | 0.4638      | -0.01307 | -0.37663           |
| 24          | 0.43311     | 0.06361  | 1.83247            |
| 25          | 0.40243     | -0.02023 | -0.58271           |
| 26          | 0.37174     | 0.03492  | 1.00608            |
| 27          | 0.34105     | 0.00718  | 0.20696            |
| 28          | 0.31037     | -0.00276 | -0.07961           |
| 29          | 0.27968     | 0.05243  | 1.51037            |
| 30          | 0.24899     | 0.02098  | 0.60452            |
| 31          | 0.21831     | 0.01573  | 0.45316            |
| 32          | 0.18762     | -0.02152 | -0.61995           |

3<sup>rd</sup> run:

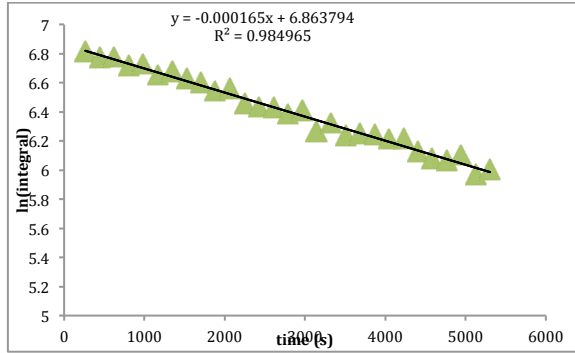

**Linear Regression**

**Regression Statistics**

|                              |         |
|------------------------------|---------|
| R                            | 0.99053 |
| R Square                     | 0.98115 |
| Adjusted R Square            | 0.98071 |
| S                            | 0.05356 |
| Total number of observations | 45      |

**In conc = 1.1507 - 0.0002 \* Time (s)**

**ANOVA**

|            | d.f. | SS      | MS      | F           |
|------------|------|---------|---------|-------------|
| Regression | 1.   | 6.42058 | 6.42058 | 2,238.40593 |
| Residual   | 43.  | 0.12334 | 0.00287 |             |
| Total      | 44.  | 6.54392 |         |             |

|           | Coefficients | Standard Error | LCL      | UCL      |
|-----------|--------------|----------------|----------|----------|
| Intercept | 1.15075      | 0.01649        | 1.12302  | 1.17847  |
| Time (s)  | -0.000162    | 0.00000342     | -0.00017 | -0.00016 |

T (10%) 1.68107  
 LCL - Lower value of a reliable interval (LCL)  
 UCL - Upper value of a reliable interval (UCL)

**Residuals**

| Observation | Predicted Y | Residual | Standard Residuals |
|-------------|-------------|----------|--------------------|
| 1           | 1.10793     | 0.00393  | 0.0742             |
| 2           | 1.07876     | -0.01196 | -0.22594           |
| 3           | 1.04968     | 0.02307  | 0.43568            |
| 4           | 1.02059     | -0.00561 | -0.10598           |
| 5           | 0.99151     | 0.03203  | 0.60505            |
| 6           | 0.96243     | -0.01049 | -0.19815           |
| 7           | 0.93334     | 0.03828  | 0.72295            |
| 8           | 0.90426     | 0.01796  | 0.33926            |
| 9           | 0.87517     | 0.02275  | 0.42974            |
| 10          | 0.84609     | -0.00727 | -0.13727           |
| 11          | 0.817       | 0.04108  | 0.77598            |
| 12          | 0.78792     | -0.03456 | -0.65266           |
| 13          | 0.75883     | -0.02915 | -0.55059           |
| 14          | 0.72975     | -0.00621 | -0.11731           |
| 15          | 0.70066     | -0.01957 | -0.36968           |
| 16          | 0.67158     | 0.03526  | 0.66599            |
| 17          | 0.64249     | -0.0812  | -1.53361           |
| 18          | 0.61341     | 0.00634  | 0.11981            |
| 19          | 0.58433     | -0.05439 | -1.02721           |
| 20          | 0.55524     | -0.01188 | -0.22432           |
| 21          | 0.52616     | 0.01273  | 0.24041            |
| 22          | 0.49707     | 0.01289  | 0.24347            |
| 23          | 0.46799     | 0.04654  | 0.87895            |
| 24          | 0.4389      | -0.01738 | -0.3282            |
| 25          | 0.40982     | -0.0306  | -0.57791           |
| 26          | 0.38073     | -0.01944 | -0.36712           |
| 27          | 0.35165     | 0.04743  | 0.89587            |
| 28          | 0.32256     | -0.05268 | -0.99503           |
| 29          | 0.29348     | 0.00696  | 0.13153            |
| 30          | 0.2644      | -0.06844 | -1.29268           |
| 31          | 0.23531     | 0.01218  | 0.23002            |
| 32          | 0.20623     | 0.02231  | 0.42143            |

**X = OMe (S1)**

| run     | $k$ (sec <sup>-1</sup> ) |
|---------|--------------------------|
| 1       | 2.86(3)x10 <sup>-4</sup> |
| 2       | 2.98(3)x10 <sup>-4</sup> |
| 3       | 2.49(6)x10 <sup>-4</sup> |
| average | 2.78(4)x10 <sup>-4</sup> |

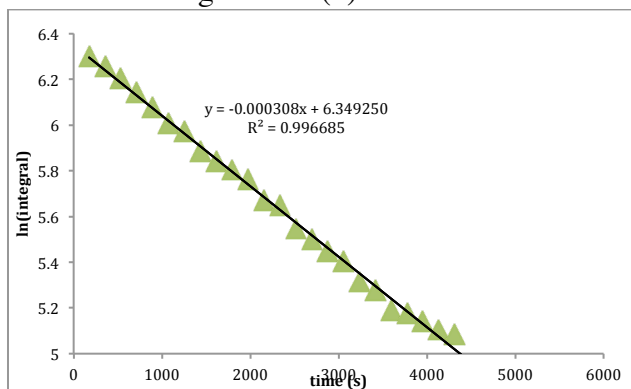

1<sup>st</sup> run:

**Linear Regression**

**Regression Statistics**

|                              |         |
|------------------------------|---------|
| R                            | 0.99631 |
| R Square                     | 0.99263 |
| Adjusted R Square            | 0.99249 |
| S                            | 0.07434 |
| Total number of observations | 57      |

**In conc = 1.0176 - 0.0003 \* Time (s)**

**ANOVA**

|            | d.f. | SS       | MS       | F           | p-level |
|------------|------|----------|----------|-------------|---------|
| Regression | 1.   | 40.91962 | 40.91962 | 7,404.41718 | 0.E+0   |
| Residual   | 55.  | 0.30395  | 0.00553  |             |         |
| Total      | 56.  | 41.22357 |          |             |         |

|           | Coefficients | Standard Error | LCL      | UCL      | t Stat    |
|-----------|--------------|----------------|----------|----------|-----------|
| Intercept | 1.01765      | 0.01979        | 0.98453  | 1.05077  | 51.41032  |
| Time (s)  | -0.000286    | 0.00000332     | -0.00029 | -0.00028 | -86.04892 |

T (10%)

LCL - Lower value of a reliable interval (LCL)  
 UCL - Upper value of a reliable interval (UCL)

**Residuals**

| Observation | Predicted Y | Residual | Standard Residuals |
|-------------|-------------|----------|--------------------|
| 1           | 0.98217     | 0.05811  | 0.78869            |
| 2           | 0.93053     | 0.06503  | 0.88266            |
| 3           | 0.87903     | 0.06438  | 0.87381            |
| 4           | 0.82753     | 0.05474  | 0.74298            |
| 5           | 0.77603     | 0.03985  | 0.54084            |
| 6           | 0.72453     | 0.02345  | 0.31835            |
| 7           | 0.67303     | 0.03857  | 0.5236             |
| 8           | 0.62153     | 0.00121  | 0.01649            |
| 9           | 0.57003     | 0.00951  | 0.12911            |
| 10          | 0.51853     | 0.02454  | 0.33315            |
| 11          | 0.46703     | 0.0329   | 0.44657            |
| 12          | 0.41553     | -0.00595 | -0.08077           |
| 13          | 0.36403     | 0.02401  | 0.32588            |
| 14          | 0.31253     | -0.02803 | -0.38053           |
| 15          | 0.26103     | -0.02274 | -0.30869           |
| 16          | 0.20953     | -0.0231  | -0.31354           |
| 17          | 0.15803     | -0.01501 | -0.20369           |
| 18          | 0.10653     | -0.05271 | -0.71548           |
| 19          | 0.05503     | -0.03824 | -0.51903           |
| 20          | 0.00352     | -0.07326 | -0.99442           |
| 21          | -0.04798    | -0.03691 | -0.50103           |
| 22          | -0.09948    | -0.02242 | -0.30433           |
| 23          | -0.15098    | -0.00553 | -0.07508           |
| 24          | -0.20248    | 0.0265   | 0.35974            |
| 25          | -0.25398    | -0.02488 | -0.33775           |
| 26          | -0.30548    | -0.03368 | -0.45722           |
| 27          | -0.35698    | -0.08823 | -1.19763           |
| 28          | -0.40848    | -0.09604 | -1.30366           |
| 29          | -0.45998    | -0.00149 | -0.02024           |
| 30          | -0.51148    | 0.04023  | 0.54611            |
| 31          | -0.56298    | -0.04945 | -0.6712            |
| 32          | -0.61448    | -0.04778 | -0.64859           |

2<sup>nd</sup> run:

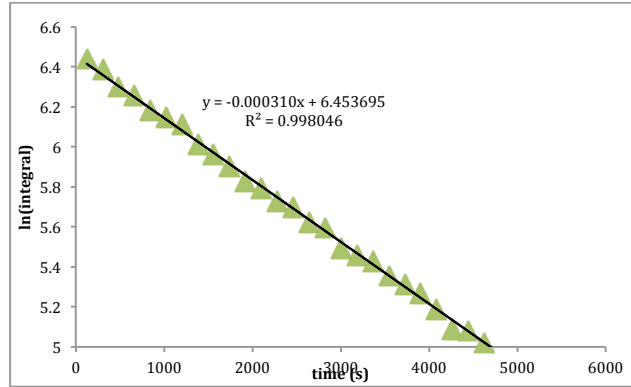

**Linear Regression**

**Regression Statistics**

|                              |         |
|------------------------------|---------|
| R                            | 0.99783 |
| R Square                     | 0.99567 |
| Adjusted R Square            | 0.99557 |
| S                            | 0.046   |
| Total number of observations | 44      |

**In conc = 1.0286 - 0.0003 \* Time (s)**

**ANOVA**

|            | d.f. | SS       | MS       | F           | p-level |
|------------|------|----------|----------|-------------|---------|
| Regression | 1.   | 20.42662 | 20.42662 | 9,655.30861 | 0.E+0   |
| Residual   | 42.  | 0.08885  | 0.00212  |             |         |
| Total      | 43.  | 20.51547 |          |             |         |

|                                                | Coefficients | Standard Error | LCL     | UCL      | t Stat    |
|------------------------------------------------|--------------|----------------|---------|----------|-----------|
| <b>Intercept</b>                               | 1.02859      | 0.01396        | 1.0051  | 1.05207  | 73.67317  |
| <b>Time (s)</b>                                | -0.000298    | 0.000003       | -0.0003 | -0.00029 | -98.26143 |
| T (10%)                                        | 1.68195      |                |         |          |           |
| LCL - Lower value of a reliable interval (LCL) |              |                |         |          |           |
| UCL - Upper value of a reliable interval (UCL) |              |                |         |          |           |

**Residuals**

| Observation | Predicted Y | Residual | Standard Residuals |
|-------------|-------------|----------|--------------------|
| 1           | 0.99162     | 0.04865  | 1.07032            |
| 2           | 0.93782     | 0.04886  | 1.07491            |
| 3           | 0.88416     | 0.0172   | 0.37827            |
| 4           | 0.83051     | 0.02834  | 0.62333            |
| 5           | 0.77685     | 0.0073   | 0.1607             |
| 6           | 0.72319     | 0.02479  | 0.54538            |
| 7           | 0.66954     | 0.0411   | 0.90407            |
| 8           | 0.61588     | -0.00262 | -0.05767           |
| 9           | 0.56223     | 0.00236  | 0.05201            |
| 10          | 0.50857     | -0.0063  | -0.13869           |
| 11          | 0.45491     | -0.02695 | -0.59284           |
| 12          | 0.40126     | -0.00773 | -0.17002           |
| 13          | 0.3476      | -0.02145 | -0.47182           |
| 14          | 0.29395     | 0.00516  | 0.11353            |
| 15          | 0.24029     | -0.01614 | -0.35511           |
| 16          | 0.18663     | 0.00906  | 0.19929            |
| 17          | 0.13298     | -0.03755 | -0.82599           |
| 18          | 0.07932     | -0.0192  | -0.42235           |
| 19          | 0.02567     | 0.00036  | 0.00801            |
| 20          | -0.02799    | -0.01674 | -0.36821           |
| 21          | -0.08165    | -0.00499 | -0.10988           |
| 22          | -0.1353     | 0.00599  | 0.13179            |
| 23          | -0.18896    | -0.02135 | -0.46971           |
| 24          | -0.24261    | -0.06903 | -1.51856           |
| 25          | -0.29627    | -0.02374 | -0.52221           |
| 26          | -0.34993    | -0.03001 | -0.66017           |
| 27          | -0.40358    | -0.04599 | -1.01179           |
| 28          | -0.45724    | 0.01959  | 0.43085            |
| 29          | -0.51089    | -0.00447 | -0.09824           |
| 30          | -0.56455    | -0.03402 | -0.74844           |
| 31          | -0.61821    | 0.0078   | 0.17158            |
| 32          | -0.67186    | -0.04909 | -1.07981           |



3<sup>rd</sup> run:

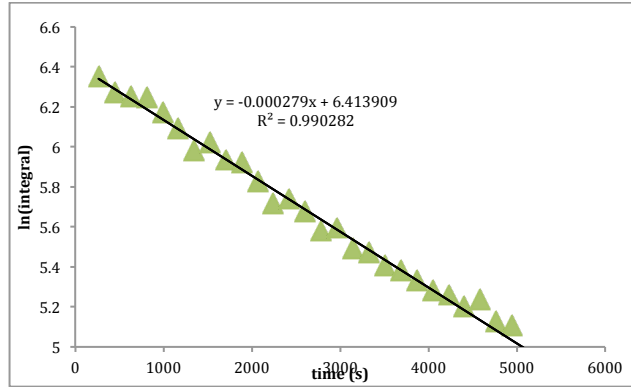

**Linear Regression**

**Regression Statistics**

|                              |         |
|------------------------------|---------|
| R                            | 0.98969 |
| R Square                     | 0.97948 |
| Adjusted R Square            | 0.97895 |
| S                            | 0.07874 |
| Total number of observations | 41      |

In conc = 1.0351 - 0.0002 \* Time (s)

**ANOVA**

|            | d.f. | SS       | MS       | F           | p-level |
|------------|------|----------|----------|-------------|---------|
| Regression | 1.   | 11.54258 | 11.54258 | 1,861.62326 | 0.E+0   |
| Residual   | 39.  | 0.24181  | 0.0062   |             |         |
| Total      | 40.  | 11.78439 |          |             |         |

|           | Coefficients | Standard Error | LCL      | UCL      | t Stat    |
|-----------|--------------|----------------|----------|----------|-----------|
| Intercept | 1.03508      | 0.02548        | 0.99215  | 1.07802  | 40.61892  |
| Time (s)  | -0.000249    | 0.000006       | -0.00026 | -0.00024 | -43.14653 |

T (10%) 1.68488  
 LCL - Lower value of a reliable interval (LCL)  
 UCL - Upper value of a reliable interval (UCL)

**Residuals**

| Observation | Predicted Y | Residual | Standard Residuals |
|-------------|-------------|----------|--------------------|
| 1           | 0.96906     | 0.07121  | 0.91592            |
| 2           | 0.9241      | 0.03615  | 0.46491            |
| 3           | 0.87925     | 0.06061  | 0.77953            |
| 4           | 0.83441     | 0.10294  | 1.32402            |
| 5           | 0.78957     | 0.07018  | 0.90262            |
| 6           | 0.74472     | 0.03566  | 0.4586             |
| 7           | 0.69988     | -0.02774 | -0.35672           |
| 8           | 0.65504     | 0.05467  | 0.70313            |
| 9           | 0.6102      | 0.01353  | 0.17406            |
| 10          | 0.56535     | 0.04585  | 0.58976            |
| 11          | 0.52051     | -0.00683 | -0.08784           |
| 12          | 0.47567     | -0.06978 | -0.89753           |
| 13          | 0.43083     | -0.0027  | -0.03478           |
| 14          | 0.38598     | -0.01896 | -0.24382           |
| 15          | 0.34114     | -0.07228 | -0.92961           |
| 16          | 0.2963      | -0.01251 | -0.16091           |
| 17          | 0.25146     | -0.06795 | -0.87391           |
| 18          | 0.20661     | -0.04327 | -0.55651           |
| 19          | 0.16177     | -0.06474 | -0.83268           |
| 20          | 0.11693     | -0.04783 | -0.61522           |
| 21          | 0.07209     | -0.0502  | -0.64562           |
| 22          | 0.02724     | -0.05573 | -0.71676           |
| 23          | -0.0176     | -0.03349 | -0.43071           |
| 24          | -0.06244    | -0.04693 | -0.60353           |
| 25          | -0.10729    | 0.03191  | 0.41038            |
| 26          | -0.15213    | -0.02939 | -0.37797           |
| 27          | -0.19697    | -0.00435 | -0.05596           |
| 28          | -0.24181    | -0.16557 | -2.12948           |
| 29          | -0.28666    | -0.14863 | -1.91165           |
| 30          | -0.3315     | 0.06954  | 0.89435            |
| 31          | -0.37634    | -0.113   | -1.45341           |
| 32          | -0.42118    | 0.07007  | 0.90124            |

**X = H (4a)**

| run     | $k$ (sec <sup>-1</sup> ) |
|---------|--------------------------|
| 1       | 3.1(1)x10 <sup>-4</sup>  |
| 2       | 2.9(1)x10 <sup>-4</sup>  |
| 3       | 3.06(9)x10 <sup>-4</sup> |
| average | 3.0(1)x10 <sup>-4</sup>  |

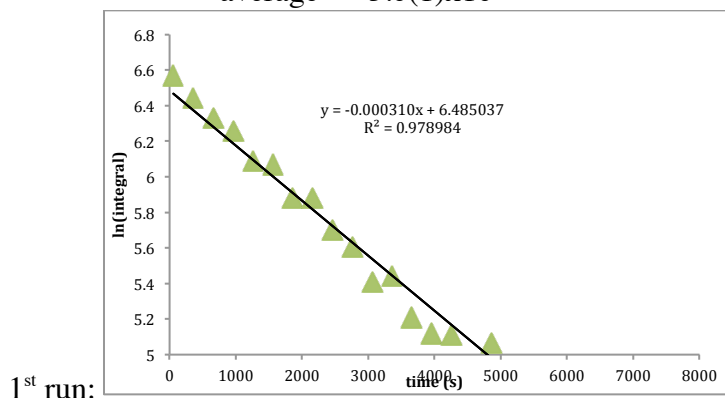

**Linear Regression**

**Regression Statistics**

|                              |         |
|------------------------------|---------|
| R                            | 0.98944 |
| R Square                     | 0.97899 |
| Adjusted R Square            | 0.97807 |
| S                            | 0.10231 |
| Total number of observations | 25      |

**In conc = 1.0496 - 0.0003 \* Time (s)**

**ANOVA**

|            | d.f. | SS       | MS       | F           | p-level |
|------------|------|----------|----------|-------------|---------|
| Regression | 1.   | 11.21667 | 11.21667 | 1,071.56389 | 0.E+0   |
| Residual   | 23.  | 0.24075  | 0.01047  |             |         |
| Total      | 24.  | 11.45743 |          |             |         |

|           | Coefficients | Standard Error | LCL      | UCL      | t Stat    |
|-----------|--------------|----------------|----------|----------|-----------|
| Intercept | 1.04956      | 0.0402         | 0.98067  | 1.11845  | 26.11042  |
| Time (s)  | -0.0003096   | 0.0000095      | -0.00033 | -0.00029 | -32.73475 |
| T (10%)   | 1.71387      |                |          |          |           |

LCL - Lower value of a reliable interval (LCL)  
 UCL - Upper value of a reliable interval (UCL)

**Residuals**

| Observation | Predicted Y | Residual | Standard Residuals |
|-------------|-------------|----------|--------------------|
| 1           | 1.03176     | 0.10287  | 1.02704            |
| 2           | 0.93872     | 0.06908  | 0.68968            |
| 3           | 0.84583     | 0.05065  | 0.50568            |
| 4           | 0.75294     | 0.06681  | 0.66702            |
| 5           | 0.66006     | -0.00517 | -0.05161           |
| 6           | 0.56717     | 0.06479  | 0.64685            |
| 7           | 0.47428     | -0.03052 | -0.30476           |
| 8           | 0.3814      | 0.06011  | 0.60015            |
| 9           | 0.28851     | -0.0233  | -0.23263           |
| 10          | 0.19562     | -0.02756 | -0.27517           |
| 11          | 0.10274     | -0.1267  | -1.26504           |
| 12          | 0.00985     | -0.00484 | -0.0483            |
| 13          | -0.08304    | -0.14527 | -1.45045           |
| 14          | -0.17592    | -0.14045 | -1.40231           |
| 15          | -0.26881    | -0.05389 | -0.53804           |
| 16          | -0.3617     | -0.09091 | -0.90771           |
| 17          | -0.45458    | 0.08484  | 0.84705            |
| 18          | -0.54747    | -0.11692 | -1.16735           |
| 19          | -0.64036    | -0.15567 | -1.55425           |
| 20          | -0.73325    | -0.00995 | -0.09937           |
| 21          | -0.82613    | 0.03095  | 0.30906            |
| 22          | -0.91902    | -0.07757 | -0.77447           |
| 23          | -1.01191    | 0.08305  | 0.82919            |
| 24          | -1.10479    | 0.15968  | 1.59433            |
| 25          | -1.19768    | 0.23591  | 2.35542            |

2<sup>nd</sup> run:

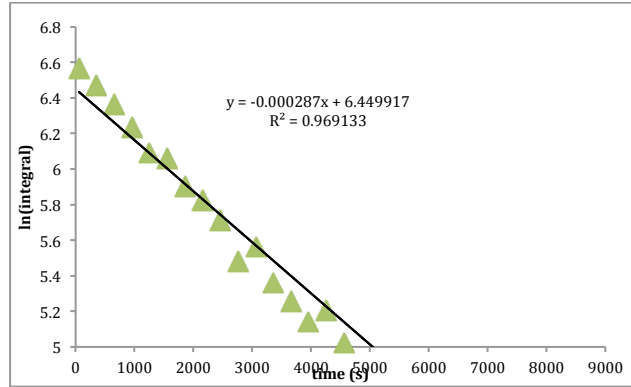

**Linear Regression**

**Regression Statistics**

|                              |         |
|------------------------------|---------|
| R                            | 0.98445 |
| R Square                     | 0.96914 |
| Adjusted R Square            | 0.96795 |
| S                            | 0.12896 |
| Total number of observations | 28      |

**In conc = 1.0200 - 0.0003 \* Time (s)**

**ANOVA**

|            | d.f. | SS       | MS      | F         | p-level |
|------------|------|----------|---------|-----------|---------|
| Regression | 1.   | 13.578   | 13.578  | 816.38741 | 0.E+0   |
| Residual   | 26.  | 0.43243  | 0.01663 |           |         |
| Total      | 27.  | 14.01043 |         |           |         |

|                                                | Coefficients | Standard Error | LCL     | UCL      | t Stat    |
|------------------------------------------------|--------------|----------------|---------|----------|-----------|
| Intercept                                      | 1.02001      | 0.04797        | 0.9382  | 1.10183  | 21.26467  |
| Time (s)                                       | -0.000287    | 0.0000101      | -0.0003 | -0.00027 | -28.57249 |
| T (10%)                                        | 1.70562      |                |         |          |           |
| LCL - Lower value of a reliable interval (LCL) |              |                |         |          |           |
| UCL - Upper value of a reliable interval (UCL) |              |                |         |          |           |

**Residuals**

| Observation | Predicted Y | Residual | Standard Residuals |
|-------------|-------------|----------|--------------------|
| 1           | 1.00349     | 0.13113  | 1.03618            |
| 2           | 0.91714     | 0.12519  | 0.98923            |
| 3           | 0.83093     | 0.10234  | 0.80868            |
| 4           | 0.74472     | 0.06066  | 0.47931            |
| 5           | 0.65852     | 0.00224  | 0.01772            |
| 6           | 0.57231     | 0.05384  | 0.42539            |
| 7           | 0.4861      | -0.0118  | -0.09327           |
| 8           | 0.3999      | -0.00592 | -0.04679           |
| 9           | 0.31369     | -0.03013 | -0.23806           |
| 10          | 0.22748     | -0.17406 | -1.37535           |
| 11          | 0.14127     | -0.01075 | -0.08491           |
| 12          | 0.05507     | -0.12579 | -0.99395           |
| 13          | -0.03114    | -0.14453 | -1.14208           |
| 14          | -0.11735    | -0.17113 | -1.35223           |
| 15          | -0.20355    | -0.0228  | -0.18015           |
| 16          | -0.28976    | -0.11802 | -0.93257           |
| 17          | -0.37597    | -0.07448 | -0.58855           |
| 18          | -0.46218    | 0.00508  | 0.04014            |
| 19          | -0.54838    | 0.02306  | 0.18219            |
| 20          | -0.63459    | -0.05052 | -0.39917           |
| 21          | -0.7208     | 0.02661  | 0.21031            |
| 22          | -0.807      | 0.19073  | 1.50708            |
| 23          | -0.89321    | -0.12572 | -0.9934            |
| 24          | -0.97942    | -0.09796 | -0.77407           |
| 25          | -1.06563    | 0.41054  | 3.24402            |
| 26          | -1.15183    | -0.10865 | -0.85854           |
| 27          | -1.23804    | 0.13806  | 1.09092            |
| 28          | -1.32425    | 0.00278  | 0.02195            |

3<sup>rd</sup> run:

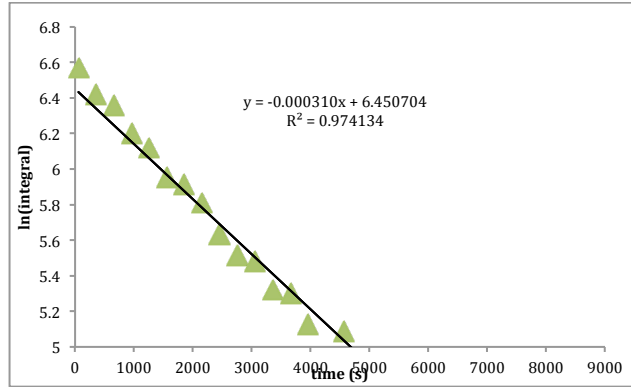

**Linear Regression**

**Regression Statistics**

|                              |         |
|------------------------------|---------|
| R                            | 0.98743 |
| R Square                     | 0.97503 |
| Adjusted R Square            | 0.97416 |
| S                            | 0.13574 |
| Total number of observations | 31      |

**In conc = 1.0055 - 0.0003 \* Time (s)**

**ANOVA**

|            | d.f. | SS       | MS       | F          | p-level |
|------------|------|----------|----------|------------|---------|
| Regression | 1.   | 20.86028 | 20.86028 | 1,132.2149 | 0.E+0   |
| Residual   | 29.  | 0.5343   | 0.01842  |            |         |
| Total      | 30.  | 21.39458 |          |            |         |

|                  | Coefficients | Standard Error | LCL      | UCL      | t Stat   |
|------------------|--------------|----------------|----------|----------|----------|
| <b>Intercept</b> | 1.00551      | 0.04805        | 0.92386  | 1.08716  | 20.92456 |
| <b>Time (s)</b>  | -0.000306    | 0.000009       | -0.00032 | -0.00029 | -33.6484 |

T (10%) 1.69913  
 LCL - Lower value of a reliable interval (LCL)  
 UCL - Upper value of a reliable interval (UCL)

**Residuals**

| Observation | Predicted Y | Residual | Standard Residuals |
|-------------|-------------|----------|--------------------|
| 1           | 0.98794     | 0.14669  | 1.09915            |
| 2           | 0.89607     | 0.09158  | 0.68625            |
| 3           | 0.80436     | 0.11907  | 0.89218            |
| 4           | 0.71264     | 0.05061  | 0.37922            |
| 5           | 0.62093     | 0.06618  | 0.49589            |
| 6           | 0.52922     | -0.00981 | -0.07351           |
| 7           | 0.43751     | 0.04331  | 0.32452            |
| 8           | 0.34579     | 0.03045  | 0.22815            |
| 9           | 0.25408     | -0.05585 | -0.41852           |
| 10          | 0.16237     | -0.08277 | -0.62024           |
| 11          | 0.07066     | -0.02437 | -0.1826            |
| 12          | -0.02106    | -0.09179 | -0.68778           |
| 13          | -0.11277    | -0.0172  | -0.12889           |
| 14          | -0.20448    | -0.105   | -0.78681           |
| 15          | -0.2962     | -0.17451 | -1.30767           |
| 16          | -0.38791    | 0.04149  | 0.31085            |
| 17          | -0.47962    | -0.21333 | -1.59851           |
| 18          | -0.57133    | -0.16742 | -1.25448           |
| 19          | -0.66305    | -0.01444 | -0.10823           |
| 20          | -0.75476    | -0.12805 | -0.95953           |
| 21          | -0.84647    | -0.06604 | -0.49482           |
| 22          | -0.93818    | -0.02578 | -0.19319           |
| 23          | -1.0299     | -0.04517 | -0.33846           |
| 24          | -1.12161    | 0.02796  | 0.20948            |
| 25          | -1.21332    | 0.21156  | 1.58525            |
| 26          | -1.30504    | 0.21813  | 1.63445            |
| 27          | -1.39675    | -0.01732 | -0.12982           |
| 28          | -1.48846    | -0.27638 | -2.07096           |
| 29          | -1.58017    | 0.29429  | 2.20513            |
| 30          | -1.67189    | 0.24374  | 1.82639            |
| 31          | -1.7636     | -0.06978 | -0.52291           |

**X = CI (S3)**

| run     | $k$ (sec <sup>-1</sup> ) |
|---------|--------------------------|
| 1       | $3.3(2) \times 10^{-4}$  |
| 2       | $3.3(2) \times 10^{-4}$  |
| average | $3.3(2) \times 10^{-4}$  |

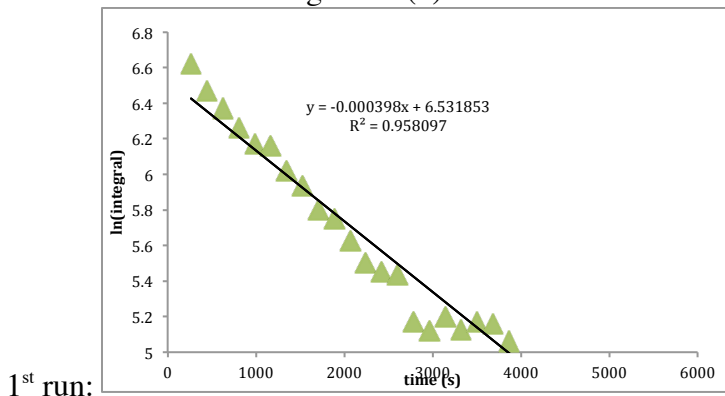

**Linear Regression**

**Regression Statistics**

|                              |         |
|------------------------------|---------|
| R                            | 0.96102 |
| R Square                     | 0.92357 |
| Adjusted R Square            | 0.9215  |
| S                            | 0.19691 |
| Total number of observations | 39      |

**In conc = 0.8723 - 0.0003 \* Time (s)**

**ANOVA**

|            | d.f. | SS       | MS      | F         | p-level |
|------------|------|----------|---------|-----------|---------|
| Regression | 1.   | 17.3346  | 17.3346 | 447.07251 | 0.E+0   |
| Residual   | 37.  | 1.43462  | 0.03877 |           |         |
| Total      | 38.  | 18.76923 |         |           |         |

|           | Coefficients | Standard Error | LCL      | UCL     | t Stat    |
|-----------|--------------|----------------|----------|---------|-----------|
| Intercept | 0.87231      | 0.06546        | 0.76188  | 0.98274 | 13.32652  |
| Time (s)  | -0.000329    | 0.00002        | -0.00036 | -0.0003 | -21.14409 |

T (10%)

1.68709

LCL - Lower value of a reliable interval (LCL)

UCL - Upper value of a reliable interval (UCL)

**Residuals**

| Observation | Predicted Y | Residual | Standard Residuals |
|-------------|-------------|----------|--------------------|
| 1           | 0.7851      | 0.32676  | 1.6817             |
| 2           | 0.7257      | 0.23753  | 1.22249            |
| 3           | 0.66646     | 0.19546  | 1.00598            |
| 4           | 0.60723     | 0.14163  | 0.72894            |
| 5           | 0.54799     | 0.11222  | 0.57754            |
| 6           | 0.48875     | 0.1645   | 0.84664            |
| 7           | 0.42952     | 0.07974  | 0.41039            |
| 8           | 0.37028     | 0.05552  | 0.28572            |
| 9           | 0.31104     | -0.02069 | -0.10649           |
| 10          | 0.25181     | -0.01408 | -0.07245           |
| 11          | 0.19257     | -0.07594 | -0.39085           |
| 12          | 0.13333     | -0.13836 | -0.71207           |
| 13          | 0.0741      | -0.12996 | -0.66885           |
| 14          | 0.01486     | -0.08931 | -0.45963           |
| 15          | -0.04438    | -0.29447 | -1.51551           |
| 16          | -0.10361    | -0.28756 | -1.47999           |
| 17          | -0.16285    | -0.14975 | -0.77072           |
| 18          | -0.22208    | -0.1604  | -0.82555           |
| 19          | -0.28132    | -0.06048 | -0.31126           |
| 20          | -0.34056    | -0.00951 | -0.04892           |
| 21          | -0.39979    | -0.04993 | -0.25699           |
| 22          | -0.45903    | -0.25826 | -1.32919           |
| 23          | -0.51827    | -0.0991  | -0.51005           |
| 24          | -0.5775     | -0.24462 | -1.25899           |
| 25          | -0.63674    | -0.05132 | -0.26413           |
| 26          | -0.69598    | -0.349   | -1.79617           |
| 27          | -0.75521    | -0.02296 | -0.11814           |
| 28          | -0.81445    | 0.05705  | 0.29363            |
| 29          | -0.87369    | -0.0541  | -0.27844           |
| 30          | -0.93292    | 0.12682  | 0.65271            |
| 31          | -0.99216    | 0.11295  | 0.5813             |
| 32          | -1.05139    | -0.00814 | -0.04188           |

2<sup>nd</sup> run:

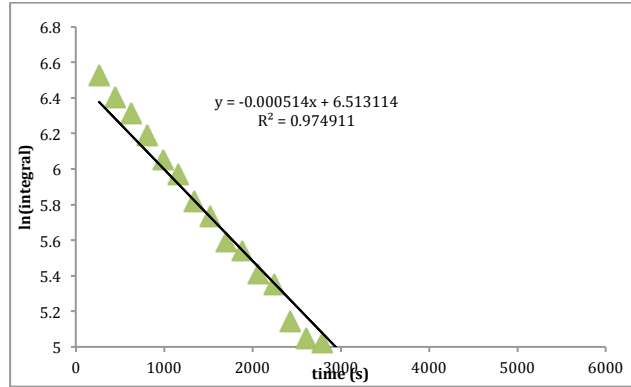

**Linear Regression**

**Regression Statistics**

|                              |         |
|------------------------------|---------|
| R                            | 0.96102 |
| R Square                     | 0.92357 |
| Adjusted R Square            | 0.9215  |
| S                            | 0.19691 |
| Total number of observations | 39      |

**In conc = 0.8723 - 0.0003 \* Time (s)**

**ANOVA**

|            | d.f. | SS       | MS      | F         | p-level |
|------------|------|----------|---------|-----------|---------|
| Regression | 1.   | 17.3346  | 17.3346 | 447.07251 | 0.E+0   |
| Residual   | 37.  | 1.43462  | 0.03877 |           |         |
| Total      | 38.  | 18.76923 |         |           |         |

|           | Coefficients | Standard Error | LCL      | UCL     | t Stat    |
|-----------|--------------|----------------|----------|---------|-----------|
| Intercept | 0.87231      | 0.06546        | 0.76188  | 0.98274 | 13.32652  |
| Time (s)  | -0.0003291   | 0.000016       | -0.00036 | -0.0003 | -21.14409 |

T (10%) 1.68709  
 LCL - Lower value of a reliable interval (LCL)  
 UCL - Upper value of a reliable interval (UCL)

**Residuals**

| Observation | Predicted Y | Residual | Standard Residuals |
|-------------|-------------|----------|--------------------|
| 1           | 0.7851      | 0.32676  | 1.6817             |
| 2           | 0.7257      | 0.23753  | 1.22249            |
| 3           | 0.66646     | 0.19546  | 1.00598            |
| 4           | 0.60723     | 0.14163  | 0.72894            |
| 5           | 0.54799     | 0.11222  | 0.57754            |
| 6           | 0.48875     | 0.1645   | 0.84664            |
| 7           | 0.42952     | 0.07974  | 0.41039            |
| 8           | 0.37028     | 0.05552  | 0.28572            |
| 9           | 0.31104     | -0.02069 | -0.10649           |
| 10          | 0.25181     | -0.01408 | -0.07245           |
| 11          | 0.19257     | -0.07594 | -0.39085           |
| 12          | 0.13333     | -0.13836 | -0.71207           |
| 13          | 0.0741      | -0.12996 | -0.66885           |
| 14          | 0.01486     | -0.08931 | -0.45963           |
| 15          | -0.04438    | -0.29447 | -1.51551           |
| 16          | -0.10361    | -0.28756 | -1.47999           |
| 17          | -0.16285    | -0.14975 | -0.77072           |
| 18          | -0.22208    | -0.1604  | -0.82555           |
| 19          | -0.28132    | -0.06048 | -0.31126           |
| 20          | -0.34056    | -0.00951 | -0.04892           |
| 21          | -0.39979    | -0.04993 | -0.25699           |
| 22          | -0.45903    | -0.25826 | -1.32919           |
| 23          | -0.51827    | -0.0991  | -0.51005           |
| 24          | -0.5775     | -0.24462 | -1.25899           |
| 25          | -0.63674    | -0.05132 | -0.26413           |
| 26          | -0.69598    | -0.349   | -1.79617           |
| 27          | -0.75521    | -0.02296 | -0.11814           |
| 28          | -0.81445    | 0.05705  | 0.29363            |
| 29          | -0.87369    | -0.0541  | -0.27844           |
| 30          | -0.93292    | 0.12682  | 0.65271            |
| 31          | -0.99216    | 0.11295  | 0.5813             |
| 32          | -1.05139    | -0.00814 | -0.04188           |

## Synthesis and Characterization of New Compounds.

### General Procedure for Preparation of ruthenium bistriflates.

#### (1-(1-adamantyl)-3-(2,4,6-trimethylphenyl)-2-imidazolidinylidene)bistriflato(*o*-isopropoxyphenylmethylidene)ruthenium (**7a**)

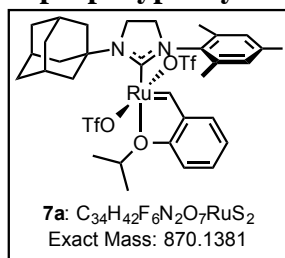

In a nitrogen filled glovebox, ruthenium dichloride (**4a**, 50 mg, 0.0778 mmol) and silver trifluoromethanesulfonate (80 mg, 0.311 mmol) were added to a 20 mL vial equipped with a stirbar. The reagents were suspended in benzene (2.6 mL) and stirred at ambient temperature for 24 h. Upon completion (<sup>1</sup>H NMR), the reaction mixture was filtered through Celite with benzene (2 mL), concentrated, filtered through silica gel with dichloromethane (4 mL), and concentrated again to provide 45 mg (67%) of bistriflato complex **7a** as a green solid. <sup>1</sup>H NMR (500 MHz, C<sub>6</sub>D<sub>6</sub>) δ 18.89 (s, 1H), 7.15–7.08 (m, 2H), 6.86 (s, 2H), 6.70 (td, *J* = 7.5, 0.8 Hz, 1H), 6.54 (d, *J* = 8.4 Hz, 1H), 4.70 (hept, *J* = 6.1 Hz, 1H), 3.23–3.12 (m, 4H), 3.01 (s, 6H), 2.38 (s, 3H), 2.21 (s, 6H), 2.21 (s, 3H), 1.96 (d, *J* = 11.8 Hz, 3H), 1.76 (d, *J* = 12.9 Hz, 3H), 1.40 (d, *J* = 6.1 Hz, 6H); <sup>13</sup>C NMR (126 MHz, C<sub>6</sub>D<sub>6</sub>) δ 202.0, 138.7, 138.4, 137.6, 133.5, 129.8, 127.9, 127.8, 127.8, 127.6, 127.6, 127.5, 122.8, 122.5, 119.2, 116.7, 114.3, 75.7, 57.3, 51.2, 44.0, 41.2, 35.8, 29.8, 21.2, 20.6, 17.7; HRMS (EI) *m/z* calculated for C<sub>34</sub>H<sub>42</sub>RuS<sub>2</sub>N<sub>2</sub>F<sub>6</sub>O<sub>7</sub> (M<sup>+</sup>) 870.1381, found 870.1350.

#### (1-(1-adamantyl)-3-(2,4,6-trimethylphenyl)-2-imidazolidinylidene)bistriflato(*o*-isopropoxy-*m*-methylphenylmethylidene)ruthenium (**S4**)

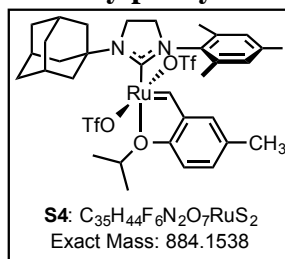

Following the general procedure, 36 mg (54%) of bistriflato complex **S4** was synthesized from dichloride complex **S2** (50 mg, 0.0761 mmol) and silver trifluoromethanesulfonate (78 mg, 0.304 mmol) in benzene (2.5 mL); <sup>1</sup>H NMR (400 MHz, C<sub>6</sub>D<sub>6</sub>) δ 18.81 (s, 1H), 6.99 (dd, *J* = 8.6, 2.4 Hz, 1H), 6.88 (s, 2H), 6.87 (s, 1H), 6.51 (d, *J* = 8.5 Hz, 1H), 4.70 (hept, *J* = 6.2 Hz, 1H), 3.30–3.13 (m, 4H), 3.02 (s, 6H), 2.39 (s, 3H), 2.26 (s, 3H), 2.22 (s, 6H), 2.06 (s, 3H), 1.97 (d, *J* = 12.5 Hz, 3H), 1.76 (d, *J* = 12.6 Hz, 3H), 1.43 (d, *J* = 6.1 Hz, 6H); <sup>13</sup>C NMR (101 MHz, C<sub>6</sub>D<sub>6</sub>) δ 202.8, 153.1, 147.1, 139.2, 138.7, 138.1, 134.5, 132.3, 130.3, 123.6, 120.0, 116.8, 114.5, 76.0, 57.8, 51.6, 44.4, 41.6, 36.2, 30.2, 21.6, 21.1, 20.0, 18.1; HRMS (EI) *m/z* calculated for C<sub>34</sub>H<sub>44</sub>RuSN<sub>2</sub>F<sub>3</sub>O<sub>4</sub> ([M–Otf]<sup>+</sup>) 735.2018, found 735.1983.

#### (1-(1-adamantyl)-3-(2,4,6-trimethylphenyl)-2-imidazolidinylidene)bistriflato(*o*-isopropoxy-*m*-chlorophenylmethylidene)ruthenium (**S5**)

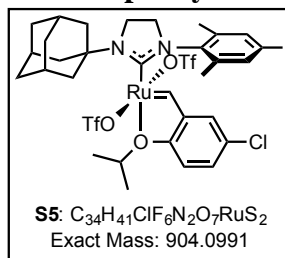

Following the general procedure, 36 mg (54%) of bistriflato complex **S5** was synthesized from dichloride complex **S3** (50 mg, 0.0739 mmol) and silver trifluoromethanesulfonate (76 mg, 0.295 mmol) in benzene (2.5 mL); <sup>1</sup>H NMR (400 MHz, C<sub>6</sub>D<sub>6</sub>) δ 18.67 (s, 1H), 7.14 (d, *J* = 9.2 Hz, 2H), 6.76 (s, 2H), 6.31 (d, *J* = 8.7 Hz, 1H), 4.57 (hept, *J* = 5.9 Hz, 1H), 3.24–3.07 (m, 4H), 2.98 (s, 4H), 2.37 (s, 3H), 2.22 (s, 3H), 2.14 (s, 6H), 1.94 (d, *J* = 12.6 Hz, 3H), 1.75 (d, *J* = 12.6 Hz, 3H), 1.34 (d, *J* = 6.1 Hz, 6H); <sup>13</sup>C NMR (101 MHz, C<sub>6</sub>D<sub>6</sub>) δ 200.6, 152.9, 147.4, 139.1, 138.7,

137.9, 132.6, 130.4, 128.6, 122.3, 119.9, 116.8, 116.0, 76.8, 57.8, 51.4, 44.4, 41.6, 36.2, 30.2, 21.5, 20.9, 17.9. HRMS (EI)  $m/z$  calculated for  $C_{33}H_{41}RuClSN_2F_3O_4$  ( $[M-Otf]^+$ ) 755.1472, found 755.1455.

**(1-(1-adamantyl)-3-(2,4,6-trimethylphenyl)-2-imidazolidinylidene)bistriflato(*o*-isopropoxy-*m*-methoxyphenylmethylidene)ruthenium (S6)**

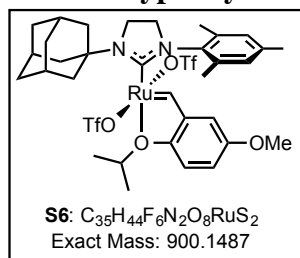

Following the general procedure, 27 mg (40%) of bistriflate complex **S6** was synthesized from dichloride complex **S1** (50 mg, 0.0743 mmol) and silver trifluoromethanesulfonate (76 mg, 0.297 mmol) in benzene (2.5 mL);  $^1H$  NMR (500 MHz,  $C_6D_6$ )  $\delta$  18.72 (d,  $J = 0.8$  Hz, 1H), 6.90 (dd,  $J = 9.0, 3.1$  Hz, 1H), 6.84 (s, 2H), 6.59 (d,  $J = 3.1$  Hz, 1H), 6.52–6.48 (m, 1H), 4.67 (hept,  $J = 6.3$  Hz, 1H), 3.30 (s, 3H), 3.25–3.13 (m, 4H), 3.02 (s, 6H), 2.40 (s, 3H), 2.21 (s, 6H), 2.17 (s, 3H), 1.98 (d,  $J = 12.3$  Hz, 3H), 1.76 (d,  $J = 12.5$  Hz, 3H), 1.40 (d,  $J = 6.1$  Hz, 6H);  $^{13}C$  NMR (126 MHz,  $C_6D_6$ )  $\delta$  202.4, 155.4, 142.8, 139.0, 138.7, 138.1, 130.2, 119.4, 115.3, 106.9, 76.0, 57.8, 55.2, 51.4, 44.4, 41.5, 36.2, 30.2, 21.6, 21.0, 18.1; HRMS (EI)  $m/z$  calculated for  $C_{35}H_{44}RuSN_2F_3O_5$  ( $[M-Otf]^+$ ) 751.1967, found 751.2002.

**(1-(1-adamantyl)-3-(2,6-diisopropylphenyl)-2-imidazolidinylidene)bistriflato(*o*-isopropoxyphenylmethylidene)ruthenium (7d)**

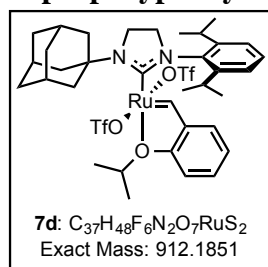

Following the general procedure, 51 mg (77%) of bistriflate complex **7d** was synthesized from dichloride complex **4d** (50 mg, 0.0729 mmol) and silver trifluoromethanesulfonate (75 mg, 0.292 mmol) in benzene (2.5 mL);  $^1H$  NMR (500 MHz,  $C_6D_6$ )  $\delta$  19.27 (d,  $J = 0.8$  Hz, 1H), 7.36 (dd,  $J = 8.4, 7.0$  Hz, 1H), 7.28 (d,  $J = 7.4$  Hz, 2H), 7.08 (ddd,  $J = 8.7, 7.3, 1.7$  Hz, 1H), 7.02 (dd,  $J = 7.5, 1.7$  Hz, 1H), 6.60 (t,  $J = 7.4$  Hz, 1H), 6.51 (d,  $J = 8.5$  Hz, 1H), 4.68 (hept,  $J = 6.4$  Hz, 1H), 3.50 (dd,  $J = 10.9, 8.7$  Hz, 2H), 3.20 (dd,  $J = 10.9, 8.7$  Hz, 2H), 3.16–3.06 (m, 8H), 2.44 (s, 3H), 2.06 (d,  $J = 11.7$  Hz, 3H), 1.77 (d,  $J = 12.7$  Hz, 3H), 1.45 (d,  $J = 6.1$  Hz, 6H), 1.24 (d,  $J = 6.6$  Hz, 6H), 1.09 (d,  $J = 6.8$  Hz, 6H);  $^{13}C$  NMR (126 MHz,  $c_6d_6$ )  $\delta$  202.6, 155.1, 148.4, 142.9, 139.7, 134.0, 129.9, 125.7, 123.1, 123.0, 115.3, 77.0, 67.8, 58.3, 55.0, 44.0, 41.4, 36.1, 30.3, 28.1, 26.2, 23.9, 21.3; HRMS (FAB)  $m/z$  calculated for  $C_{33}H_{41}RuClSN_2F_3O_4$  ( $[M+H]^+$ ) 913.1929, found 913.1910.

**Characterization data for dipivalate complexes**

The ready conversion of ruthenium dicarboxylates to cyclometalated complexes precludes their isolation and full characterization. For this reason, only the  $^1H$  NMR spectrum for these compounds is reported, and was obtained as a solution in THF- $d_8$ /CD $_3$ OD, in the presence of excess sodium carboxylate and trimethoxybenzene. For most pivalates HRMS data could also be obtained to further support the structural assignment.



**(1-(1-adamantyl)-3-(2,4,6-trimethylphenyl)-2-imidazolidinylidene)bispivalato(*o*-isopropoxyphenylmethylidene)ruthenium (6a)**

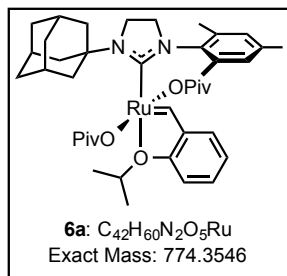

Bispivalato complex **6a** was observed while conducting kinetics experiments described above; <sup>1</sup>H NMR (500 MHz, 1:1 THF-*d*<sub>8</sub>:CD<sub>3</sub>OD, 0 °C) δ 17.38 (s, 1H), 7.70 (dq, *J* = 9.6, 5.1 Hz, 1H), 7.39 (s, 2H), 7.29 (d, *J* = 8.3 Hz, 1H), 7.21 (d, *J* = 4.4 Hz, 2H), 5.26 (d, *J* = 9.8 Hz, 1H), 4.30 (dd, *J* = 11.2, 8.6 Hz, 2H), 4.09–4.00 (m, 3H), 3.39 (s, 6H), 2.84–2.69 (m, 7H), 2.30 (d, *J* = 25.1 Hz, 14H), 1.65 (d, *J* = 6.2 Hz, 7H), 1.16 (s, 18H); HRMS (FAB) *m/z* calculated for C<sub>42</sub>H<sub>60</sub>RuN<sub>2</sub>O<sub>5</sub>Na ([M+Na]<sup>+</sup>) 797.3444, found 797.3429.

**(1-(1-adamantyl)-3-(2,6-diisopropylphenyl)-2-imidazolidinylidene)bispivalato(*o*-isopropoxyphenylmethylidene)ruthenium (6d)**

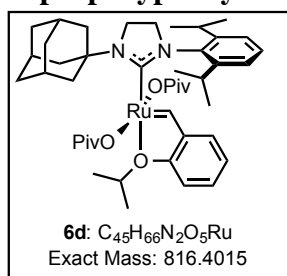

Bispivalato complex **6d** was observed while conducting kinetics experiments described above; <sup>1</sup>H NMR (500 MHz, 1:1 THF-*d*<sub>8</sub>:CD<sub>3</sub>OD, 0 °C) δ 17.56 (s, 1H), 7.87 (t, *J* = 7.9 Hz, 1H), 7.79–7.70 (m, 1H), 7.69 (d, *J* = 7.7 Hz, 1H), 7.42–7.35 (m, 1H), 7.32 (d, *J* = 8.5 Hz, 1H), 7.17 (dt, *J* = 7.5, 3.2 Hz, 1H), 7.11–7.03 (m, 1H), 5.23 (p, *J* = 6.1 Hz, 1H), 4.87 (p, *J* = 6.0 Hz, 1H), 4.32 (dd, *J* = 10.7, 8.4 Hz, 2H), 4.19–4.07 (m, 2H), 3.95 (s, 4H), 3.41–3.26 (m, 6H), 2.74 (s, 3H), 2.54 (s, 3H), 2.28 (q, *J* = 14.0, 13.1 Hz, 6H), 1.69 (d, *J* = 6.1 Hz, 6H), 1.60 (t, *J* = 6.0 Hz, 6H), 1.22 (s, 18H), 1.09 (d, *J* = 6.7 Hz, 6H).

**(1-(1-adamantyl)-3-(2,4,6-trimethylphenyl)-2-imidazolidinylidene)bispivalato(*o*-isopropoxy-*m*-methylphenylmethylidene)ruthenium (10a)**

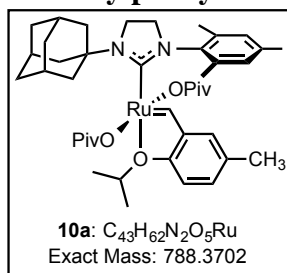

Bispivalato complex **10a** was observed while conducting kinetics experiments described above; <sup>1</sup>H NMR (500 MHz, 1:1 THF-*d*<sub>8</sub>:CD<sub>3</sub>OD, 0 °C) δ 17.33 (s, 1H), 7.58–7.50 (m, 1H), 7.41 (s, 2H), 7.17 (d, *J* = 8.4 Hz, 1H), 7.03 (s, 1H), 5.23 (s, 1H), 4.32 (t, *J* = 9.8 Hz, 2H), 4.08 (t, *J* = 10.9 Hz, 2H), 3.97 (s, 6H), 3.41 (s, 6H), 2.66 (s, 4H), 2.40–2.27 (m, 13H), 2.12 (s, 6H), 1.66 (d, *J* = 6.1 Hz, 6H), 1.19 (s, 18H); HRMS (FAB) *m/z* calculated for C<sub>43</sub>H<sub>62</sub>RuN<sub>2</sub>O<sub>5</sub>Na ([M+Na]<sup>+</sup>) 811.3600, found 811.3590.

**(1-(1-adamantyl)-3-(2,4,6-trimethylphenyl)-2-imidazolidinylidene)bispivalato(*o*-isopropoxy-*m*-chlorophenylmethylidene)ruthenium (10b)**

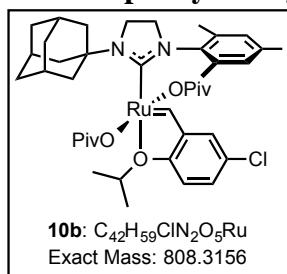

Bispivalato complex **10b** was observed while conducting kinetics experiments described above; <sup>1</sup>H NMR (500 MHz, 1:1 THF-*d*<sub>8</sub>:CD<sub>3</sub>OD, 0 °C) δ 17.21 (s, 1H), 7.75–7.69 (m, 1H), 7.48–7.36 (m, 2H), 7.29 (dd, *J* = 13.5, 6.4 Hz, 1H), 7.22 (d, *J* = 8.1 Hz, 1H), 5.24 (s, 1H), 4.35 (t, *J* = 9.9 Hz, 2H), 4.09 (d, *J* = 10.2 Hz, 2H), 3.97 (s, 6H), 3.49–3.36 (m, 6H), 2.34 (q, *J* = 13.0 Hz, 8H), 1.66 (d, *J* = 6.2 Hz, 6H), 1.22 (s, 18H); HRMS (FAB) *m/z* calculated for C<sub>42</sub>H<sub>59</sub>RuClN<sub>2</sub>O<sub>5</sub>Na ([M+Na]<sup>+</sup>) 831.3054, found 831.3055.

**(1-(1-adamantyl)-3-(2,4,6-trimethylphenyl)-2-imidazolidinylidene)bispivalato(*o*-isopropoxy-*m*-methoxyphenylmethylidene)ruthenium (10c)**

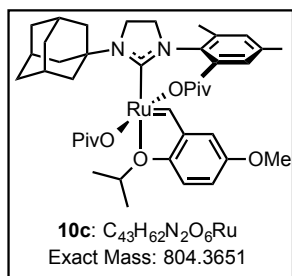

Bispivalato complex **10c** was observed while conducting kinetics experiments described above; <sup>1</sup>H NMR (500 MHz, 1:1 THF-*d*<sub>8</sub>:CD<sub>3</sub>OD, 0 °C) δ 17.21 (s, 1H), 7.40 (s, 2H), 7.28 (dd, *J* = 9.0, 3.1 Hz, 1H), 7.17 (d, *J* = 7.9 Hz, 1H), 6.76 (s, 1H), 5.23–5.09 (m, 1H), 4.31 (dd, *J* = 11.0, 8.6 Hz, 2H), 4.11–4.04 (m, 2H), 3.95 (s, 6H), 3.44–3.33 (m, 6H), 2.77 (q, *J* = 5.9, 5.2 Hz, 6H), 2.38–2.20 (m, 14H), 2.09 (s, 7H), 1.61 (d, *J* = 6.2 Hz, 6H), 1.17 (s, 18H); HRMS (FAB) *m/z* calculated for C<sub>43</sub>H<sub>62</sub>RuN<sub>2</sub>O<sub>6</sub>Na ([M+Na]<sup>+</sup>) 827.3550, found 827.3571.

**(1-(1-adamantyl)-3-(2,4,6-trimethylphenyl)-2-imidazolidinylidene)70isbenzoate(*o*-isopropoxy-phenylmethylidene)ruthenium (8a)**

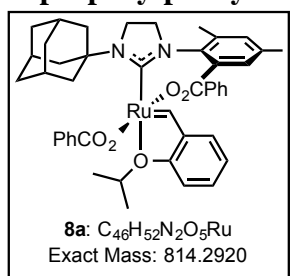

Dibenzoate complex **8a** was observed while conducting kinetics experiments described above; <sup>1</sup>H NMR (500 MHz, 1:1 THF-*d*<sub>8</sub>:CD<sub>3</sub>OD, 0 °C) δ 17.86 (s, 1H), 7.99 (d, *J* = 7.5 Hz, 4H), 7.76–7.65 (m, 3H), 7.55 (t, *J* = 7.5 Hz, 4H), 7.39 (d, *J* = 8.5 Hz, 3H), 7.29 (dd, *J* = 12.8, 7.5 Hz, 2H), 5.30 (p, *J* = 6.4 Hz, 1H), 4.29 (dd, *J* = 11.5, 8.2 Hz, 2H), 4.06 (dd, *J* = 11.3, 8.7 Hz, 2H), 3.95 (d, *J* = 3.2 Hz, 3H), 3.45 (s, 6H), 2.75 (s, 3H), 2.43 (d, *J* = 12.6 Hz, 3H), 2.39–2.30 (m, 9H), 2.09 (s, 3H), 1.63 (d, *J* = 6.0 Hz, 6H).

**(1-(1-adamantyl)-3-(2,4,6-trimethylphenyl)-2-imidazolidinylidene)bis-*p*-nitrobenzoato(*o*-isopropoxy-phenylmethylidene)ruthenium (8b)**

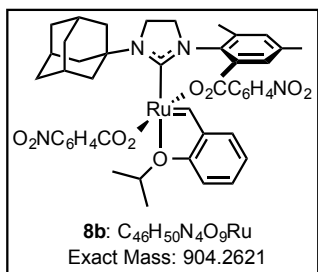

Dibenzoate complex **8b** was observed while conducting kinetics experiments described above; <sup>1</sup>H NMR (500 MHz, 1:1 THF-*d*<sub>8</sub>:CD<sub>3</sub>OD, 0 °C) δ 17.89 (s, 1H), 8.14 (d, *J* = 8.3 Hz, 4H), 7.76 (t, *J* = 7.7 Hz, 1H), 7.48–7.28 (m, 6H), 5.34 (s, 1H), 4.31 (t, *J* = 9.7 Hz, 2H), 4.09 (t, *J* = 10.4 Hz, 2H), 3.96 (d, *J* = 16.8 Hz, 8H), 3.45 (s, 7H), 2.88 (s, 3H), 2.78 (d, *J* = 17.3 Hz, 3H), 2.51–2.26 (m, 15H), 2.11 (d, *J* = 20.7 Hz, 8H).

**(1-(1-adamantyl)-3-(2,4,6-trimethylphenyl)-2-imidazolidinylidene)bis-*p*-chlorobenzoato(*o*-isopropoxy-phenylmethylidene)ruthenium (8c)**

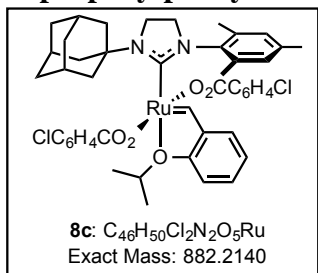

Dibenzoate complex **8c** was observed while conducting kinetics experiments described above; <sup>1</sup>H NMR (500 MHz, 1:1 THF-*d*<sub>8</sub>:CD<sub>3</sub>OD, 0 °C) δ 17.86 (s, 1H), 7.94 (d, *J* = 8.1 Hz, 4H), 7.74 (t, *J* = 7.8 Hz, 1H), 7.57 (d, *J* = 8.5 Hz, 4H), 7.43–7.34 (m, 3H), 7.34–7.25 (m, 2H), 5.36–5.24 (m, 1H), 4.29 (t, *J* = 9.8 Hz, 2H), 4.07 (dd, *J* = 11.5, 8.8 Hz, 2H), 3.95 (s, 4H), 3.44 (s, 6H), 2.86 (d, *J* = 5.0 Hz, 4H), 2.75 (s, 3H), 2.45–2.38 (m, 3H), 2.36 (d, *J* = 13.1 Hz, 3H), 2.32 (s, 6H), 2.09 (s, 5H), 1.61 (t, *J* = 5.8 Hz, 6H).

**(1-(1-adamantyl)-3-(2,4,6-trimethylphenyl)-2-imidazolidinylidene)bis-*p*-methylbenzoato(*o*-isopropoxy-phenylmethylidene)ruthenium (8d)**

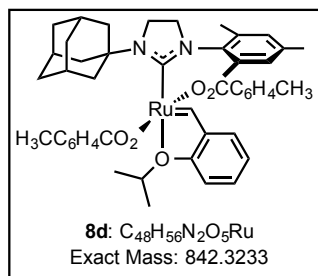

Dibenzoate complex **8d** was observed while conducting kinetics experiments described above; <sup>1</sup>H NMR (500 MHz, 1:1 THF-*d*<sub>8</sub>:CD<sub>3</sub>OD, 0 °C) δ 17.85 (s, 1H), 7.88 (d, *J* = 7.7 Hz, 4H), 7.76–7.67 (m, 1H), 7.36 (t, *J* = 6.1 Hz, 7H), 7.26 (dd, *J* = 11.0, 7.9 Hz, 2H), 5.34–5.22 (m, 1H), 4.28 (dd, *J* = 11.3, 8.3 Hz, 2H), 4.05 (dd, *J* = 11.0, 8.3 Hz, 2H), 3.95 (s, 3H), 3.45 (s, 6H), 2.85 (s, 3H), 2.74 (s, 3H), 2.65 (s, 6H), 2.59 (s, 6H), 2.47–2.39 (m, 3H), 2.35 (d, *J* = 12.6 Hz, 3H), 2.08 (s, 3H), 1.62 (dd, *J* = 9.5, 6.1 Hz, 6H).

**(1-(1-adamantyl)-3-(2,4,6-trimethylphenyl)-2-imidazolidinylidene)bis-*p*-methoxybenzoato(*o*-isopropoxy-phenylmethylidene)ruthenium (8e)**

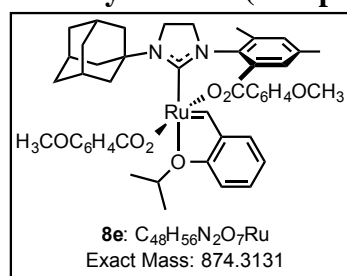

Dibenzoate complex **8e** was observed while conducting kinetics experiments described above; <sup>1</sup>H NMR (500 MHz, 1:1 THF-*d*<sub>8</sub>:CD<sub>3</sub>OD, 0 °C) δ 17.85 (s, 1H), 7.93 (d, *J* = 8.3 Hz, 4H), 7.72 (t, *J* = 7.7 Hz, 1H), 7.37 (d, *J* = 8.0 Hz, 3H), 7.31–7.23 (m, 2H), 7.07 (d, *J* = 8.4 Hz, 4H), 5.34–5.23 (m, 1H), 4.28 (t, *J* = 9.9 Hz, 2H), 4.09–4.04 (m, 5H), 3.95 (s, 3H), 3.44 (s, 6H), 2.85 (s, 3H), 2.74 (s, 3H), 2.43 (d, *J* = 9.8 Hz, 4H), 2.35 (d, *J* = 12.9 Hz, 9H), 2.09 (s, 4H), 1.62 (d, *J* = 6.1 Hz, 6H).

**Cyclometalated Benzoate (9a)**

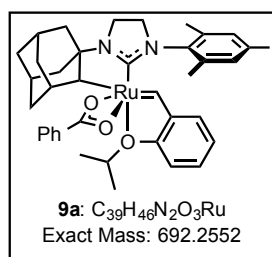

Cyclometalated complex **9a** was isolated from kinetics experiments by concentrating the reaction mixture, filtering through Celite with benzene to remove excess sodium pivalate and concentrating. The crude solid was then triturated with pentanes to remove pivalic acid; <sup>1</sup>H NMR (500 MHz, C<sub>6</sub>D<sub>6</sub>) δ 15.07 (s, 1H), 8.09 (dd, *J* = 6.6, 3.0 Hz, 2H), 7.49 (dd, *J* = 7.5, 1.7 Hz, 1H), 7.23 (ddd, *J* = 8.6, 7.4, 1.7 Hz, 1H), 7.20–7.15 (m, 3H), 6.88 (td, *J* = 7.4, 0.9 Hz, 1H), 6.78 (d, *J* = 1.6 Hz, 2H), 6.59 (d, *J* = 8.3 Hz, 1H), 6.16 (d, *J* = 2.0 Hz, 1H), 4.69 (hept, *J* = 6.3 Hz, 1H), 4.25 (s, 1H), 3.39–3.19 (m, 4H), 2.50 (s, 3H), 2.47 (s, 1H), 2.21–2.14 (m, 2H), 2.11 (s, 1H), 2.09 (s, 4H), 2.06–1.98 (m, 1H), 1.87 (dq, *J* = 11.8, 2.3 Hz, 1H), 1.72 (dd, *J* = 6.4, 3.2 Hz, 1H), 1.63–1.46 (m, 6H), 1.39–1.15 (m, 5H), 0.92 (d, *J* = 6.2 Hz, 3H), 0.88 (t, *J* = 7.1 Hz, 1H), 0.76 (dd, *J* = 12.9, 3.4 Hz, 1H); <sup>13</sup>C NMR (126 MHz, C<sub>6</sub>D<sub>6</sub>) δ 215.5, 154.7, 143.9, 137.5, 137.2, 136.4, 136.2, 130.4, 130.0, 129.7, 129.2, 128.6, 127.7, 127.5, 125.7, 123.3, 123.2, 112.9, 74.2, 68.9, 62.9, 51.4, 43.4, 41.7, 40.6, 38.2, 38.0, 37.7, 33.6, 31.2, 30.0, 22.7, 21.3, 21.1, 20.7, 18.8, 18.4; HRMS (FAB) *m/z* calculated for C<sub>39</sub>H<sub>45</sub>RuN<sub>2</sub>O<sub>3</sub> ([M+H<sup>+</sup>-H<sub>2</sub>]<sup>+</sup>) 691.2474, found 691.2464.

**Cyclometalated *p*-Nitrobenzoate (9b)**

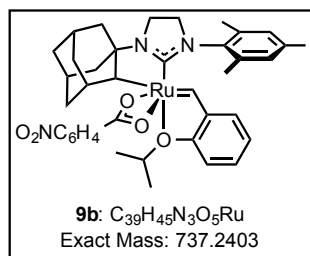

Cyclometalated complex **9b** was not stable enough to be isolated. Complex **9b** has a <sup>1</sup>H NMR (500 MHz, 1:1 THF-*d*<sub>8</sub>:CD<sub>3</sub>OD) peak associated with the benzylic proton at δ 15.33 ppm.

### Cyclometalated *p*-chlorobenzoate (**9c**)

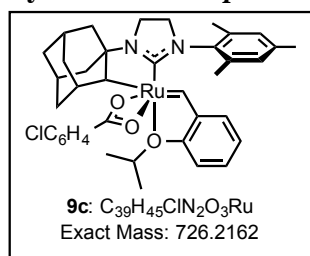

Cyclometalated complex **9c** was isolated from kinetics experiments by concentrating the reaction mixture, filtering through Celite with benzene to remove excess sodium pivalate and concentrating. The crude solid was then triturated with pentanes to remove pivalic acid; <sup>1</sup>H NMR (500 MHz, C<sub>6</sub>D<sub>6</sub>) δ 15.06 (s, 1H), 7.85 (d, *J* = 8.4 Hz, 2H), 7.48 (dd, *J* = 7.5, 1.7 Hz, 1H), 7.24 (ddd, *J* = 8.3, 7.4, 1.7 Hz, 1H), 7.12 (d, *J* = 8.8 Hz, 1H), 6.87 (td, *J* = 7.4, 0.9 Hz, 1H), 6.73 (s, 1H), 6.60 (d, *J* = 8.3 Hz, 1H), 6.07 (s, 1H), 4.68 (hept, *J* = 6.4 Hz, 1H), 4.20 (s, 1H), 3.37–3.16 (m, 4H), 2.47 (s, 3H), 2.44 (q, *J* = 2.9 Hz, 1H), 2.17 (t, *J* = 3.3 Hz, 1H), 2.13 (dt, *J* = 11.5, 3.0 Hz, 1H), 2.10–2.04 (m, 4H), 2.04–1.95 (m, 4H), 1.87 (dq, *J* = 12.0, 2.5 Hz, 1H), 1.73–1.65 (m, 1H), 1.61–1.45 (m, 7H), 1.30–1.16 (m, 3H), 0.93–0.85 (m, 4H), 0.77–0.70 (m, 1H); <sup>13</sup>C NMR (126 MHz, C<sub>6</sub>D<sub>6</sub>) δ 215.1, 154.7, 143.8, 137.4, 137.0, 136.5, 136.2, 134.3, 131.1, 129.9, 129.2, 127.7, 127.7, 125.8, 123.3, 112.9, 74.1, 69.1, 62.9, 51.4, 43.4, 41.6, 40.6, 38.2, 38.0, 37.7, 33.6, 31.2, 30.0, 22.7, 21.3, 21.0, 20.7, 18.8, 18.3, 14.3. HRMS (FAB) *m/z* calculated for C<sub>39</sub>H<sub>44</sub>RuN<sub>2</sub>O<sub>3</sub>Cl ([M+H<sup>+</sup>-H<sub>2</sub>]<sup>+</sup>) 725.2084, found 725.2066.

### Cyclometalated *p*-methylbenzoate (**9d**)

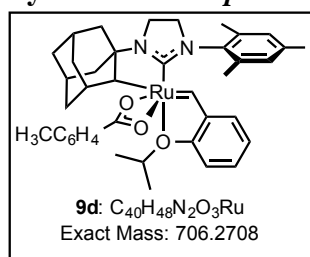

Cyclometalated complex **9d** was isolated from kinetics experiments by concentrating the reaction mixture, filtering through Celite with benzene to remove excess sodium pivalate and concentrating. The crude solid was then triturated with pentanes to remove pivalic acid; <sup>1</sup>H NMR (500 MHz, C<sub>6</sub>D<sub>6</sub>) δ 15.05 (s, 1H), 8.01 (d, *J* = 7.7 Hz, 2H), 7.50 (dd, *J* = 7.5, 1.7 Hz, 1H), 7.23 (ddd, *J* = 8.5, 7.4, 1.7 Hz, 1H), 6.99 (dd, *J* = 7.8, 1.2 Hz, 2H), 6.88 (td, *J* = 7.5, 0.9 Hz, 1H), 6.78 (s, 1H), 6.60 (d, *J* = 8.3 Hz, 1H), 6.23 (s, 1H), 4.71 (hept, *J* = 6.4 Hz, 1H), 4.27 (s, 1H), 3.39–3.20 (m, 4H), 2.51 (s, 3H), 2.47 (q, *J* = 2.9 Hz, 1H), 2.22–2.16 (m, 2H), 2.16–2.01 (m, 12H), 1.94–1.84 (m, 1H), 1.72 (s, 1H), 1.63–1.57 (m, 4H), 1.57–1.47 (m, 2H), 1.32–1.24 (m, 1H), 1.24–1.16 (m, 1H), 0.93 (d, *J* = 6.2 Hz, 3H), 0.87 (t, *J* = 7.1 Hz, 1H), 0.78 (d, *J* = 12.1 Hz, 1H); <sup>13</sup>C NMR (126 MHz, C<sub>6</sub>D<sub>6</sub>) δ 215.8, 175.3, 154.7, 143.9, 140.2, 137.5, 137.3, 136.3, 136.1, 133.6, 130.0, 129.8, 129.2, 128.1, 125.6, 123.3, 123.2, 112.9, 74.2, 68.9, 62.9, 51.4, 43.5, 41.7, 40.7, 38.3, 38.0, 37.7, 33.6, 31.2, 30.0, 21.4, 21.3, 21.1, 20.7, 18.8, 18.4. HRMS (FAB) *m/z* calculated for C<sub>40</sub>H<sub>47</sub>RuN<sub>2</sub>O<sub>3</sub> ([M+H<sup>+</sup>-H<sub>2</sub>]<sup>+</sup>) 705.2631, found 705.2659.

### Cyclometalated *p*-methoxybenzoate (**9e**)

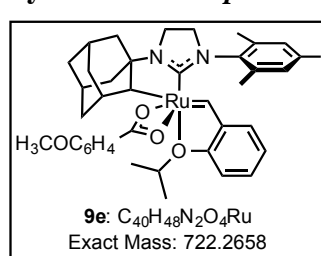

Cyclometalated complex **9e** was isolated from kinetics experiments by concentrating the reaction mixture, filtering through Celite with benzene to remove excess sodium pivalate and concentrating. The crude solid was then triturated with pentanes to remove pivalic acid; <sup>1</sup>H NMR (500 MHz, C<sub>6</sub>D<sub>6</sub>) δ 15.06 (s, 1H), 8.05 (d, *J* = 8.2 Hz, 3H), 7.49 (dd, *J* = 7.5, 1.7 Hz, 1H), 7.24 (ddd, *J* = 8.2, 7.3, 1.7 Hz, 1H), 6.88 (td, *J* = 7.4, 0.9 Hz, 1H), 6.81–6.74 (m, 3H), 6.62 (dd, *J* = 8.3, 1.1 Hz, 2H), 6.25 (s, 1H), 4.73 (hept, *J* = 6.3 Hz, 1H), 4.27 (s, 1H), 3.40–3.21 (m, 9H), 2.51 (s, 4H), 2.48 (s, 2H), 2.22–2.17 (m, 3H), 2.16 (s, 5H), 2.13–2.01 (m, 5H), 1.94–1.84 (m, 2H), 1.76–1.69 (m, 2H), 1.61 (d, *J* = 6.4 Hz, 4H), 1.60–1.53 (m, 1H), 1.53–1.47 (m, 2H), 1.31–1.24 (m, 1H), 1.24–1.16 (m, 1H), 0.97 (d, *J* = 6.2 Hz, 4H), 0.78 (d, *J* = 12.1

Hz, 2H);  $^{13}\text{C}$  NMR (125 MHz,  $\text{C}_6\text{D}_6$ )  $\delta$  215.9, 175.2, 162.0, 154.7, 143.9, 137.3, 136.3, 136.1, 131.4, 130.0, 129.2, 129.1, 125.6, 123.3, 123.2, 112.9, 112.8, 74.2, 68.9, 62.9, 51.5, 43.5, 41.7, 40.7, 38.3, 38.0, 37.8, 33.6, 31.3, 30.1, 25.8, 21.3, 21.1, 20.7, 18.8, 18.4; HRMS (FAB)  $m/z$  calculated for  $\text{C}_{40}\text{H}_{47}\text{RuN}_2\text{O}_4$  ( $[\text{M}+\text{H}^+-\text{H}_2]^+$ ) 721.2580, found 721.2614.

### Methylbenzylidene cyclometalated complex (11a)

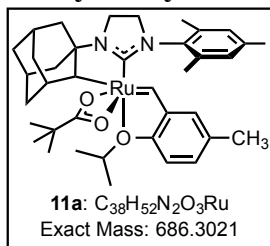

Cyclometalated complex **11a** was isolated from kinetics experiments by concentrating the reaction mixture, filtering through Celite with benzene to remove excess sodium pivalate and concentrating. The crude solid was then triturated with pentanes to remove pivalic acid;  $^1\text{H}$  NMR (500 MHz,  $\text{C}_6\text{D}_6$ )  $\delta$  14.88 (s, 1H), 7.33 (d,  $J = 2.2$  Hz, 1H), 7.11 (ddd,  $J = 8.3, 2.3, 0.9$  Hz, 1H), 6.83 (s, 1H), 6.75 (s, 1H), 6.65 (d,  $J = 8.3$  Hz, 1H), 4.80 (hept,  $J = 6.5$  Hz, 1H), 4.22 (s, 1H), 3.49–3.36 (m, 2H), 3.32–3.13 (m, 3H), 2.57 (s, 1H), 2.46 (s, 3H), 2.28 (d,  $J = 4.0$  Hz, 6H), 2.20 (s, 3H), 2.16–2.09 (m, 3H), 2.04 (dd,  $J = 11.1, 2.8$  Hz, 1H), 1.96 (dt,  $J = 11.2, 3.0$  Hz, 1H), 1.88–1.81 (m, 1H), 1.68 (s, 1H), 1.58–1.46 (m, 5H), 1.45–1.39 (m, 1H), 1.26 (s, 9H), 1.22–1.18 (m, 4H), 0.75 (d,  $J = 12.0$  Hz, 1H);  $^{13}\text{C}$  NMR (126 MHz,  $\text{C}_6\text{D}_6$ )  $\delta$  215.9, 152.4, 143.8, 138.0, 137.1, 136.7, 136.4, 132.1, 129.8, 129.6, 127.7, 125.8, 123.6, 113.6, 93.5, 74.1, 68.5, 65.9, 62.7, 54.9, 51.7, 43.4, 41.3, 40.6, 38.2, 38.1, 36.9, 33.8, 31.1, 30.0, 28.6, 21.6, 21.2, 21.0, 20.3, 19.2, 19.0; HRMS (EI)  $m/z$  calculated for  $\text{C}_{38}\text{H}_{51}\text{RuN}_2\text{O}_3$  ( $[\text{M}+\text{H}^+-\text{H}_2]^+$ ) 685.2944, found 685.2950.

### Chlorobenzylidene cyclometalated complex (11b)

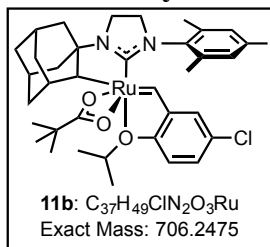

Cyclometalated complex **11b** was isolated from kinetics experiments by concentrating the reaction mixture, filtering through Celite with benzene to remove excess sodium pivalate and concentrating. The crude solid was then triturated with pentanes to remove pivalic acid;  $^1\text{H}$  NMR (500 MHz,  $\text{C}_6\text{D}_6$ )  $\delta$  14.66 (s, 1H), 7.55 (d,  $J = 2.6$  Hz, 1H), 7.26 (dd,  $J = 8.7, 2.6$  Hz, 1H), 6.80 (s, 1H), 6.73 (s, 1H), 6.40 (d,  $J = 8.8$  Hz, 1H), 4.63 (hept,  $J = 6.7$  Hz, 1H), 4.23 (s, 1H), 3.45–3.33 (m, 2H), 3.31 (s, 1H), 3.30–3.19 (m, 2H), 3.13 (dt,  $J = 11.5, 9.5$  Hz, 1H), 2.48 (s, 1H), 2.35 (s, 3H), 2.24 (s, 3H), 2.18 (s, 3H), 2.09 (d,  $J = 14.6, 3.3, 2.4$  Hz, 2H), 2.00 (d, 1H), 1.92 (d, 1H), 1.83 (d, 1H), 1.62 (s, 1H), 1.55 (d, 1H), 1.49 (t,  $J = 2.7$  Hz, 1H), 1.45 (d,  $J = 6.6$  Hz, 3H), 1.34 (d, 1H), 1.24 (s, 13H), 1.09 (d,  $J = 6.3$  Hz, 3H), 0.59 (d,  $J = 12.2$  Hz, 1H);  $^{13}\text{C}$  NMR (126 MHz,  $\text{C}_6\text{D}_6$ )  $\delta$  214.7, 152.5, 144.9, 142.8, 137.7, 136.9, 136.7, 136.6, 129.8, 129.7, 128.6, 128.5, 124.2, 122.1, 114.7, 93.5, 74.9, 69.6, 65.9, 62.7, 51.7, 43.2, 41.3, 40.5, 39.6, 38.1, 38.1, 36.9, 33.8, 31.0, 29.8, 28.5, 21.5, 21.0, 19.2, 18.9; HRMS (EI)  $m/z$  calculated for  $\text{C}_{37}\text{H}_{48}\text{RuClN}_2\text{O}_3$  ( $[\text{M}+\text{H}^+-\text{H}_2]^+$ ) 705.2398, found 705.2428.

### Methoxybenzylidene cyclometalated complex (11c)

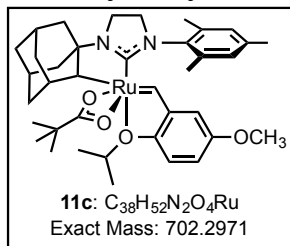

Cyclometalated complex **11c** was isolated from kinetics experiments by concentrating the reaction mixture, filtering through Celite with benzene to remove excess sodium pivalate and concentrating. The crude solid was then triturated with pentanes to remove pivalic acid;  $^1\text{H}$  NMR (500 MHz,  $\text{C}_6\text{D}_6$ )  $\delta$  14.85 (s, 1H), 7.18 (d,  $J = 3.0$  Hz, 1H), 6.95 (dd,  $J = 8.9, 3.0$  Hz, 1H), 6.82 (s, 1H), 6.75 (s, 1H), 6.62 (d,  $J = 8.5$  Hz, 1H), 4.76 (hept,  $J = 6.4$  Hz, 1H), 4.23 (s, 1H), 3.47–3.33 (m, 5H), 3.32–3.22 (m, 2H), 3.17 (dt,  $J = 11.5, 9.6$  Hz, 1H), 2.58 (s, 1H), 2.43 (s, 3H), 2.27 (s, 3H), 2.20 (s,

3H), 2.12 (d,  $J = 8.7$  Hz, 3H), 2.03 (dt,  $J = 11.1, 1.9$  Hz, 1H), 1.95 (dq,  $J = 10.6, 2.2$  Hz, 1H), 1.89–1.82 (m, 1H), 1.71–1.64 (m, 1H), 1.60–1.54 (m, 1H), 1.52 (d,  $J = 6.6$  Hz, 5H), 1.39 (dq,  $J = 11.3, 2.0$  Hz, 1H), 1.25 (s, 12H), 1.20 (d,  $J = 6.3$  Hz, 4H), 1.05 (dq,  $J = 10.4, 2.6$  Hz, 1H), 0.79–0.70 (m, 1H);  $^{13}\text{C}$  NMR (126 MHz,  $\text{C}_6\text{D}_6$ )  $\delta$  215.2, 155.9, 148.0, 144.0, 137.6, 136.6, 136.3, 136.0, 129.4, 129.2, 113.6, 109.8, 107.4, 73.8, 68.6, 62.3, 55.0, 51.3, 42.9, 40.9, 40.2, 39.1, 37.8, 37.6, 36.5, 33.4, 30.7, 29.6, 28.1, 21.2, 20.9, 20.6, 18.8, 18.6; HRMS (FAB)  $m/z$  calculated for  $\text{C}_{38}\text{H}_{51}\text{RuN}_2\text{O}_4$  ( $[\text{M}+\text{H}^+-\text{H}_2]^+$ ) 701.2893, found 701.2923.

### Synthesis of New Benzylidene Chelates

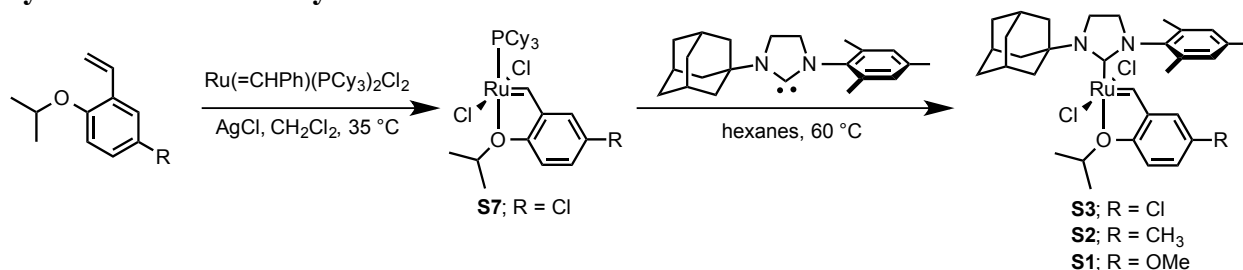

### tricyclohexylphosphinedichloro(*o*-isopropoxy-*m*-chlorophenylmethylidene)ruthenium (**S7**)

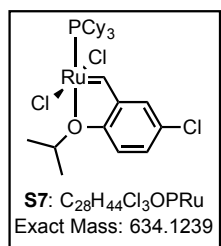

Following the analogous reported procedure,<sup>1</sup> in a nitrogen filled glovebox, benzylidenebis(tricyclohexylphosphine)ruthenium dichloride (200 mg, 0.243 mmol), silver(I) chloride (70 mg, 0.487 mmol) and 2-isopropoxy-5-chlorostyrene (96 mg, 0.487 mmol) were weighed into a 20 mL vial. The reagents were suspended in dichloromethane (8 mL), the vial was sealed, removed from the glovebox and heated to 35 °C. Silica gel was added to the reaction mixture, and the residual solvent was removed under reduced pressure. The product-laden silica gel was loaded onto a silica gel column and

eluted with 3:1 hexanes: $\text{CH}_2\text{Cl}_2$  to provide 95 mg (62%) of **S7** as a brown powder;  $^1\text{H}$  NMR (500 MHz,  $\text{C}_6\text{D}_6$ )  $\delta$  17.04 (d,  $J = 4.6$  Hz, 1H), 7.35 (d,  $J = 2.5$  Hz, 1H), 7.18 (dd,  $J = 8.8, 2.5$  Hz, 1H), 6.24 (d,  $J = 8.8$  Hz, 1H), 4.56 (heptd,  $J = 6.2, 1.8$  Hz, 1H), 2.39 (qt,  $J = 12.2, 2.7$  Hz, 3H), 2.16 (d,  $J = 12.9$  Hz, 6H), 1.91 (q,  $J = 12.4$  Hz, 3H), 1.73 (dq,  $J = 11.4, 3.9$  Hz, 6H), 1.67 (d,  $J = 6.1$  Hz, 6H), 1.58 (s, 3H), 1.26 ? 1.13 (m, 9H);  $^{13}\text{C}$  NMR (126 MHz,  $\text{C}_6\text{D}_6$ )  $\delta$  266.4, 151.4, 144.9, 142.8, 128.4, 121.9, 114.4, 76.3, 36.1 (d,  $J = 24.4$  Hz), 30.5, 28.1 (d,  $J = 10.5$  Hz), 26.6, 22.1;  $^{31}\text{P}$  NMR (121 MHz,  $\text{C}_6\text{D}_6$ )  $\delta$  59.6; HRMS (FAB)  $m/z$  calculated for  $\text{C}_{28}\text{H}_{44}\text{RuPOCl}_2^{37}\text{Cl}$  ( $[\text{M}]^+$ ) 636.1210, found 636.1218.

### (1-(1-adamantyl)-3-(2,4,6-trimethylphenyl)-2-imidazolidinylidene)dichloro(*o*-isopropoxy-*m*-chlorophenylmethylidene)ruthenium (**S3**)

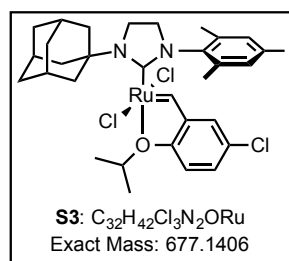

In a nitrogen filled glovebox, ruthenium complex **S7** (95 mg, 0.150 mmol) and 1-(1-adamantyl)-3-(2,4,6-trimethylphenyl)imidazolylidene (48 mg, 0.150 mmol) were weighed into a 20 mL vial. The reagents were suspended in hexanes (3.7 mL), sealed, removed from the glovebox, and heated to 60 °C. The solution was stirred until the brown color disappeared and was replaced by a green precipitate. The mixture was filtered through Celite with extra hexanes (2 mL) to collect a green

<sup>1</sup> Van Veldhuizen, J. J.; Gillingham, D. G.; Garber, S. B.; Kataoka, O.; Hoveyda, A. H. *J. Am. Chem. Soc.* **2003**, *125*, 12502–12508.

solid. The solid was eluted with dichloromethane (2 mL) into a clean flask to provide 96 mg (95%) of ruthenium NHC complex **S3** as a green solid.  $^1\text{H}$  NMR (500 MHz,  $\text{C}_6\text{D}_6$ )  $\delta$  16.88 (s, 1H), 7.18 (dd,  $J = 8.6, 2.6$  Hz, 1H), 7.11 (d,  $J = 2.6$  Hz, 1H), 6.78 (s, 2H), 6.15 (d,  $J = 8.6$  Hz, 1H), 4.40 (hept,  $J = 6.2$  Hz, 1H), 3.30–3.24 (m, 4H), 2.92 (s, 6H), 2.31 (s, 6H), 2.29 (s, 3H), 2.25 (s, 3H), 1.88 (d,  $J = 12.3$  Hz, 3H), 1.68 (d,  $J = 12.8$  Hz, 3H), 1.50 (d,  $J = 6.1$  Hz, 6H);  $^{13}\text{C}$  NMR (126 MHz,  $\text{C}_6\text{D}_6$ )  $\delta$  208.4, 150.8, 147.0, 140.0, 138.6, 138.4, 130.0, 128.6, 128.4, 122.6, 114.5, 74.8, 57.2, 50.9, 44.4, 42.2, 36.4, 30.5, 22.4, 21.0, 18.5; HRMS (FAB)  $m/z$  calculated for  $\text{C}_{32}\text{H}_{41}\text{RuON}_2\text{Cl}_2$  ( $[\text{M}]^+$ ) 678.1299, found 678.1290.

**(1-(1-adamantyl)-3-(2,4,6-trimethylphenyl)-2-imidazolidinylidene)dichloro(*o*-isopropoxy-*m*-methoxyphenylmethylidene)ruthenium (**S2**)**

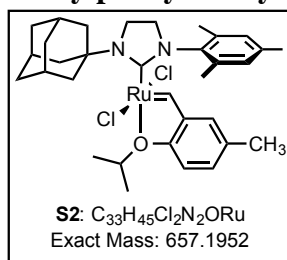

In a nitrogen filled glovebox, ruthenium complex (120 mg, 0.195 mmol) and 1-(1-adamantyl)-3-(2,4,6-trimethylphenyl)imidazolinylidene (63 mg, 0.195 mmol) were weighed into a 20 mL vial. The reagents were suspended in hexanes (4.9 mL), sealed, removed from the glovebox, and heated to 60 °C. The solution was stirred until the brown color disappeared and was replaced by a green precipitate. The mixture was filtered through Celite with extra hexanes (2 mL) to collect a green solid. The solid was eluted with dichloromethane (2 mL) into a clean

flask to provide 120 mg (94%) of ruthenium NHC complex **S2** as a green solid.  $^1\text{H}$  NMR (500 MHz,  $\text{C}_6\text{D}_6$ )  $\delta$  17.03 (s, 1H), 7.04 (ddd,  $J = 8.3, 2.3, 0.9$  Hz, 1H), 6.86 (s, 2H), 6.85 (d,  $J = 2.2$  Hz, 1H), 6.41 (d,  $J = 8.3$  Hz, 1H), 4.59 (hept,  $J = 7.0$  Hz, 1H), 3.34–3.27 (m, 4H), 2.96 (s, 6H), 2.37 (s, 6H), 2.34–2.29 (m, 4H), 2.28 (s, 3H), 2.22 (s, 3H), 1.91 (d,  $J = 12.1$  Hz, 3H), 1.69 (dt,  $J = 12.5, 3.1$  Hz, 3H), 1.59 (d,  $J = 6.1$  Hz, 6H);  $^{13}\text{C}$  NMR (126 MHz,  $\text{C}_6\text{D}_6$ )  $\delta$  210.0, 150.5, 146.0, 140.0, 138.1, 137.8, 130.9, 129.9, 129.5, 127.9, 127.6, 123.6, 112.8, 73.6, 56.8, 50.6, 44.0, 41.8, 36.0, 30.1, 22.1, 20.7, 19.7, 18.3; HRMS (FAB)  $m/z$  calculated for  $\text{C}_{33}\text{H}_{44}\text{RuON}_2\text{Cl}_2$  ( $[\text{M}]^+$ ) 656.1875, found 656.1861.

**(1-(1-adamantyl)-3-(2,4,6-trimethylphenyl)-2-imidazolidinylidene)dichloro(*o*-isopropoxy-*m*-methoxyphenylmethylidene)ruthenium (**S1**)**

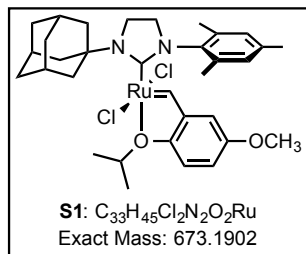

In a nitrogen filled glovebox, ruthenium complex (135 mg, 0.214 mmol) and 1-(1-adamantyl)-3-(2,4,6-trimethylphenyl)imidazolinylidene (72 mg, 0.225 mmol) were weighed into a 20 mL vial. The reagents were suspended in hexanes (5.4 mL), sealed, removed from the glovebox, and heated to 60 °C. The solution was stirred until the brown color disappeared and was replaced by a green precipitate. The mixture was filtered through Celite with extra hexanes (2 mL) to collect a green solid. The solid

was eluted with dichloromethane (2 mL) into a clean flask to provide 136 mg (94%) of ruthenium NHC complex **S1** as a green solid.  $^1\text{H}$  NMR (500 MHz,  $\text{C}_6\text{D}_6$ )  $\delta$  16.92 (s, 1H), 6.95 (dd,  $J = 8.9, 3.1$  Hz, 1H), 6.84 (s, 2H), 6.62 (d,  $J = 3.0$  Hz, 1H), 6.38 (dt,  $J = 8.9, 0.9$  Hz, 1H), 4.54 (hept,  $J = 6.2$  Hz, 1H), 3.43 (s, 3H), 3.33–3.29 (m, 4H), 2.96 (s, 6H), 2.36 (s, 6H), 2.31 (s, 3H), 2.20 (s, 3H), 1.91 (d,  $J = 12.1$  Hz, 3H), 1.69 (d,  $J = 12.4$  Hz, 3H), 1.58 (d,  $J = 6.1$  Hz, 6H);  $^{13}\text{C}$  NMR (126 MHz,  $\text{C}_6\text{D}_6$ )  $\delta$  210.1, 155.5, 138.6, 138.2, 129.9, 128.6, 128.1, 127.7, 115.4, 113.7, 107.5, 74.1, 65.9, 57.2, 55.3, 50.9, 44.4, 42.2, 36.4, 30.5, 22.5, 21.1, 18.7; HRMS (FAB)  $m/z$  calculated for  $\text{C}_{33}\text{H}_{44}\text{RuO}_2\text{N}_2\text{Cl}_2$  ( $[\text{M}]^+$ ) 672.1824, found 672.1807.

## Synthesis of Deuterated Complexes

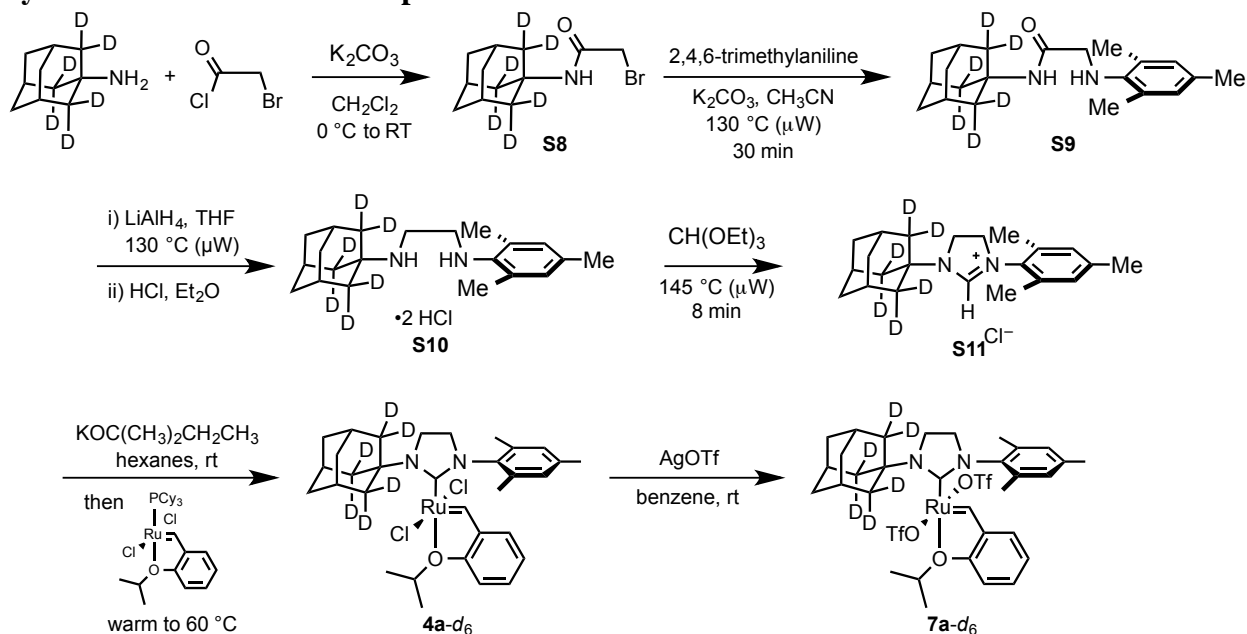

### *N*-(adamantan-1-yl-2,2,8,8,9,9-*d*<sub>6</sub>)-2-bromoacetamide (**S8**)

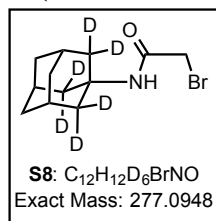

1-aminoadamantane-*d*<sub>6</sub> (500 mg, 3.16 mmol) was transferred to a 20 mL scintillation vial equipped with a stir bar and suspended in dichloromethane (6.6 mL). Solid K<sub>2</sub>CO<sub>3</sub> (872 mg, 6.4 mmol) was added to the vial, which was capped with a septum and attached to a nitrogen bubbler and cooled by immersion in an ice bath. Bromoacetyl chloride (0.350 mL, 3.63 mmol) was then added drop-wise via syringe. The slurry immediately thickened and after five minutes the vial was warmed to room temperature and gently stirred for two hours. The reaction was diluted with chloroform (7 mL) and an additional quantity of bromoacetyl chloride (0.1 mL) was added to ensure complete consumption of starting material. This homogenous solution was stirred at room temperature for 10 minutes. The vial contents were transferred to a 50 mL round bottom flask containing water (6.6 mL) and vigorously stirred for 75 minutes at room temperature. A very mild exotherm was noted at the beginning of the quenching process. The flask contents were then transferred to a 125 mL separatory funnel and vigorously shaken. The organic layer was drawn off and dried by slow passage through a plug of magnesium sulfate (3 g). Additional chloroform (15 mL) was used for a second aqueous extraction and used to rinse the magnesium salts. The organic solvents were removed with rotary evaporation and the residue was pumped overnight on the vacuum manifold (60 mTorr) to provide the amide (**S8**) as a white powder (818 mg, 93% yield). This preparation is based upon that reported for the analogous *t*-butyl amide;<sup>2</sup> <sup>1</sup>H NMR<sup>3</sup> (400 MHz, CDCl<sub>3</sub>) δ 1.64–1.72 (m,

<sup>2</sup> Mani, T.; Tircso, G.; Zhao, P.; Sherry, A. D.; Woods, M., *Inorg. Chem.* **2009**, *48*, 10338–10345.

<sup>3</sup> Literature NMR characterization of the unlabeled compound: Battistini, E.; Gianolo, E.; Gref, R.; Couvreur, P.; Fuzerova, S.; Othman, M.; Aime, S.; Badet, B.; Durand, P., *Chem. Eur. J.* **2008**, *14*, 4551–4561. <sup>1</sup>H NMR (300 MHz, CDCl<sub>3</sub>): δ=1.66–1.71 (m, 6H; 3CH<sub>2</sub> Ad), 1.99–2.03 (m, 6H; 3CH<sub>2</sub> Ad), 2.06–2.13 (m, 3H; 3CH Ad), 3.77 (s, 2H; CH<sub>2</sub>Br), 6.11 ppm (sl, 1H; NH); <sup>13</sup>C



5.9H), 2.06–2.10 (m, 3H), 3.78 (s, 2H), 6.14 (br s, 1H);  $^{13}\text{C}$  NMR (100 MHz,  $\text{CDCl}_3$ )  $\delta$  29.14(m), 29.93, 36.10(m), 40.21(quintet,  $^1J_{\text{CD}} = 19.7$  Hz), 52.15, 164.10; HRMS (FAB)  $m/z$  calculated for  $\text{C}_{12}\text{H}_{13}\text{ON}^2\text{H}_6$   $^{81}\text{Br}$  ( $[\text{M}+\text{H}^+]^+$ ) 280.1006, found 280.0999.

### ***N*-(adamantan-1-yl-2,2,8,8,9,9-*d*<sub>6</sub>)-2-(2,4,6-trimethylphenyl)amino)acetamide (**S9**)**

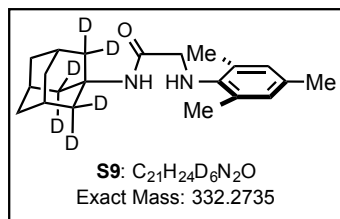

The  $\alpha$ -bromo amide (**S8**, 360 mg, 1.29 mmol) and  $\text{K}_2\text{CO}_3$  (285 mg, 2.06 mmol) were transferred into a 2-5 mL microwave vial containing a magnetic stir bar. Acetonitrile (2.4 mL) was added via syringe and used to wash the sidewalls free of any particulate matter. 2,4,6-trimethyl aniline (1.8 mL, 12.82 mmol) was added to the vial, which was sealed with a septum and stirred for five minutes at room temperature. The vial was transferred to a microwave reactor and heated to 130 °C for 30 minutes. At the midpoint of the run, the average microwave power was 70 W and the average internal pressure was 4 bar. Upon cooling, the vial was opened and the heterogeneous mixture was stirred briefly with chloroform (4 mL). The inorganic salts were removed with paper/gravity filtration and additional chloroform (10 mL) was used to rinse the microwave vial and filter cake. The organic solvents were combined in a 100 mL flask and removed with rotary evaporation, leaving behind a viscous oily residue consisting of reaction products and excess 2,4,6-trimethyl aniline. The bulk 2,4,6-trimethyl aniline was removed by overnight evacuation (60 mTorr) on the vacuum manifold), after which a buff-colored waxy solid, still contaminated with residual 2,4,6-trimethyl aniline, remained in the flask. The residue was purified by silica gel column chromatography in the following manner: silica gel (40 g) was dispersed in chloroform containing 0.5% diethylamine (80 mL) and the slurry was transferred to a flash silica gel column (Chem Glass Part No. CG-1197-13) to provide a settled column dimension of 1 x 6 in. The residue was dissolved in chloroform/0.5% diethylamine (6 mL), loaded onto the column, and gravity-eluted with 150 mL chloroform/0.5% diethylamine, followed with 200 mL of chloroform/0.5% diethylamine/0.5% methanol. After approximately 100 mL solvent had exited the column, fractions (8 mL) were collected in 13 x 100 mm culture tubes. TLC (5% methanol in dichloromethane) with UV visualization was used to detect the desired product ( $R_f = 0.4$ ) which was found in tubes 17-25. Other components eluting off the column included 2,4,6-trimethyl aniline ( $R_f = 0.5$ , tubes 2-10) and the dialkylation product ( $R_f = 0.38$ , tubes 26-27). Fractions containing the desired product were combined and the solvent removed using rotary evaporation. Residual solvents were removed by overnight evacuation (60 mTorr) using a vacuum manifold to provide a hard and waxy buff-colored solid (**S9**, 336 mg, 78% yield);  $^1\text{H}$  NMR (400 MHz,  $\text{CDCl}_3$ )  $\delta$  1.64–1.72 (m, 5.6H), 2.06–2.10 (m, 3H), 2.23 (s, 3H), 2.25 (s, 6H), 3.47 (s, 2H), 6.82 (s, 2H), 6.90 (br s, 1H);  $^{13}\text{C}$  NMR (100 MHz,  $\text{CDCl}_3$ )  $\delta$  18.32, 20.52, 29.22(m), 36.23, 40.74(quintet,  $^1J_{\text{CD}} = 19.7$  Hz), 51.15, 52.68, 129.55, 129.66, 132.18, 142.73, 170.06; HRMS (FAB)  $m/z$  calculated for  $\text{C}_{21}\text{H}_{25}\text{ON}_2^2\text{H}_6$  ( $[\text{M}+\text{H}^+]^+$ ) 333.2813, found 333.2812.

NMR (75 MHz,  $\text{CDCl}_3$ ):  $\delta$ =29.26(3) (CH Ad), 29.83 (CH<sub>2</sub>Br), 36.12(3) (CH<sub>2</sub> Ad), 41.06(3) (CH<sub>2</sub> Ad), 52.43 (CAdNH), 164.07 ppm (C=O).

***N*<sup>1</sup>-(adamantan-1-yl-2,2,8,8,9,9-*d*<sub>6</sub>)-*N*<sup>2</sup>-(2,4,6-trimethylphenyl)ethane-1,2-diammonium dichloride (S10)**

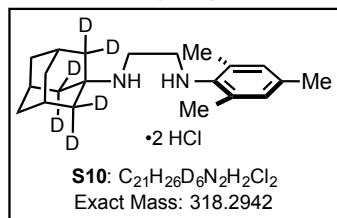

LiAlH<sub>4</sub> (161 mg, 4.2 mmol) was weighed into an oven-dried 2-5 mL microwave vial containing a stir bar. This vessel was fit with a 14/20 septum, attached to a dry nitrogen source via a needle connection, and cooled in an ice bath. Anhydrous THF (2.5 mL) was added via syringe to the vial, washing the sidewalls to remove any particulate lithium aluminum hydride. In a separate 10 mL conical flask, the starting amide (**S9**, 140 mg, 0.420 mmol) was mostly dissolved in THF (1.5 mL) and transferred via syringe with drop-wise addition to the 0 °C stirring suspension of lithium aluminum hydride. Additional THF (0.6 mL and 0.2 mL, respectively) was used to transfer all of the amide (**S9**) from the conical flask to the microwave vial. The microwave vial was then warmed to room temperature and its contents stirred under nitrogen for 30 min. The vial was then sealed with a septum, transferred to a microwave reactor, and heated to 130 °C for 60 minutes. At the midpoint of the run, the average microwave power was 100 W and the average internal pressure was 8 bar. After cooling to room temperature, the vial was opened and its contents were transferred via Pasteur pipet to a 50 mL pear-shaped flask equipped with a stir bar. The flask contents were cooled to 0 °C and the excess lithium aluminum hydride was quenched by slow and drop-wise successive additions of water (0.161 mL, **warning:** vigorous reaction), 15% aqueous NaOH (0.161 mL), and water (0.483 mL). Ethyl acetate (16 mL) was used in aliquots to rinse the microwave vial and this solution was transferred to the 50 mL flask and used to disperse and render granular the forming aluminum salts. After stirring overnight, the insoluble material was removed by gravity filtration through fluted filter paper and the filter cake was rinsed with additional ethyl acetate (25 mL). The volatile solvents were removed with rotary evaporation, and a hard white solid formed after overnight evacuation (60 mTorr) on the vacuum manifold. The residue was purified by silica gel column chromatography in the following manner: silica gel (15.6 g) was dispersed in chloroform containing 0.5% diethylamine/0.5% methanol (80 mL) and the slurry was transferred to a flash silica gel column (Chem Glass Part No. CG-1197-13) to provide a settled column dimension of 1 x 2.5 in. The residue was dissolved in chloroform/0.5% diethylamine/0.5% methanol (6 mL), loaded onto the column, and gravity-eluted with chloroform/0.5% diethylamine/0.5% methanol (100 mL), chloroform/0.5% diethylamine/1% methanol (100 mL), and chloroform/0.5% diethylamine/2% methanol (50 mL). After collecting an approximate 60 mL forecut, fractions (8 mL) were collected in 13 x 100 mm culture tubes. TLC (10% methanol in dichloromethane) with UV visualization was used to detect the desired product (R<sub>f</sub> = 0.2), which was found in tubes 8-20. Fractions containing the desired product were combined and the solvent removed using rotary evaporation. Residual solvents were removed by overnight evacuation (60 mTorr) using a vacuum manifold to provide a hard white solid (127 mg, 94% yield). This material was not characterized.

To form the bis-HCl salt, the diamine was transferred to a pre-weighed 0.5-2 mL conical microwave vial using aliquots of diethyl ether (7 mL total). 2 M HCl in diethyl ether (1.5 mL, 3 mmol) was added to the vigorously stirred diamine solution and a white precipitate immediately formed. This suspension was stirred for 60 min, after which the diamine bis-HCl salt was separated by brief centrifugation. The salt was washed three times by re-suspension/pelleting using fresh diethyl ether (3 x 3 mL). After the final wash, the vial/pellet was allowed to air dry

for 8 h before being placed overnight on the vacuum manifold for removal of trace solvents (60 mTorr). A white powder was obtained (**S10**, 153 mg, 93% yield over two steps);  $^1\text{H NMR}^4$  (400 MHz,  $\text{DMSO-}d_6$ )  $\delta$  1.55–1.70 (m, 5.4H), 2.13 (m, 2.9H), 2.23 (s, 3H), 2.44 (s, 6H), 3.37 (br m, 2H), 3.61 (br m, 2H), 6.98 (s, 2H), 9.72 (br s, 2H);  $^{13}\text{C NMR}$  (100 MHz,  $\text{DMSO-}d_6$ )  $\delta$  17.89, 20.15, 28.11 (m), 34.95 (m), 35.83 (br), 36.15 (m), 45.94, 56.22, 130.15, 131.33, 133.33 (br), 137.17 (br); HRMS (FAB)  $m/z$  calculated for  $\text{C}_{21}\text{H}_{27}\text{N}_2\text{D}_6$  ( $[\text{M}-\text{Cl}^--\text{HCl}]^+$ ) 319.3020, found 319.3009.

### 1-(adamantan-1-yl-2,2,8,8,9,9- $d_6$ )-3-(2,4,6-trimethylphenyl)-4,5-dihydro-1H-imidazol-3-ium chloride (**S11**)

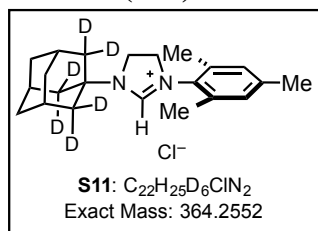

The diamine bis-HCl salt (**S10**, 116 mg, 0.296 mmol) was suspended in triethyl orthoformate (3 mL) in a 0.5–2 mL conical microwave vial equipped with a stir bar. The vial was sealed with a septum, transferred to a microwave reactor, and heated to 145 °C for 8 minutes. At the midpoint of the run, the average microwave power was 60 W and the average internal pressure was 1 bar. The suspension was cooled to room temperature and anhydrous ether (3 mL) was added via syringe to the septum-sealed vial. This suspension was stirred for 30 min, after which the insoluble material was separated by centrifugation. The supernatant was removed via syringe, and the product was washed three times by re-suspension/pelleting using fresh anhydrous diethyl ether (3 x 3 mL) delivered and removed from the septum-sealed vial via syringe. After removing the final wash solvent, the pellet was dried for 35 min with a gentle flow of nitrogen gas delivered via a needle inlet. The septum was removed and the vial was placed in a vacuum chamber (60 mTorr) for 12 hours. A white powder was obtained (**S11**, 87 mg, 80% yield). This preparation is based upon that reported for the analogous 1,3-diarylimidazolium chlorides; $^5$   $^1\text{H NMR}$  (400 MHz,  $\text{CDCl}_3$ )  $\delta$  1.72 (m, 5.2H), 2.26 (m, 3.5H), 2.30 (s, 6H), 4.24 (app t,  $J = 11.1$  Hz, 2H), 4.39 (app t,  $J = 11.1$  Hz, 2H), 6.90 ppm (s, 2H), 9.09 (s, 1H);  $^{13}\text{C NMR}$  (100 MHz,  $\text{CDCl}_3$ ):  $\delta$  = 18.17, 21.03, 28.99(m), 29.93, 35.32(m), 40.11(quintet,  $^1J_{\text{CD}} = 19.9$  Hz), 45.22, 50.85, 57.65, 129.88, 131.03, 135.30, 140.01, 156.71; HRMS (FAB)  $m/z$  calculated for  $\text{C}_{22}\text{H}_{24}\text{N}_2\text{D}_7$  ( $[\text{M}]^+$ ) 330.2927, found 330.2938.

<sup>4</sup> Literature NMR characterization of the unlabeled compound: Dinger, M.B.; Nieczypor, P.; Mol., J. C. *Organometallics*, **2003**, 22, 5291.  $^1\text{H NMR}$  ( $\text{DMSO-}d_6$ ):  $\delta$  9.90 (br s, 2 H, NH), 6.98 (s, 2 H, C6H2Me3), 3.69 (br s, 2 H, CH2NHMe3), 3.42 (br s, 2 H, AdNHCH2), 2.47 (s, 6 H, o-CH3), 2.22 (s, 3 H, p-CH3), 2.13 (br s, 3 H, H-Ad), 1.94 (s, 6 H, H-Ad), 1.63 (pseudo q, JH,H ~ 11.5 Hz, 6 H, H-Ad).  $^{13}\text{C NMR}$  ( $\text{DMSO-}d_6$ ):  $\delta$  138.0 (*i*-C6H2Me3), 133.4 (*p*-C6H2Me3), 131.5 (*m*-C6H2Me3), 130.2 (*o*-C6H2Me3), 56.6 (C-1 Ad), 50.0 (MesNCH2), 46.0 (AdNCH2), 37.5 (C-2 Ad), 35.1 (C-4 Ad), 28.4 (CH-3 Ad), 20.2 (*p*-CH3), 18.1 (*o*-CH3).

<sup>5</sup> Aidouni, A.; Demonceau, A.; Delaude, L. *Synlett*, **2006**, 493–495. See also Hans, M.; Delaude, L. *Org. Synth.* **2010**, 87, 77–87.

**(1-(adamant-1-yl-2,2,8,8,9,9-*d*<sub>6</sub>)-3-(2,4,6-trimethylphenyl)-2-imidazolidinylidene)dichloro(*o*-isopropoxyphenylmethylidene)ruthenium (**4a-*d*<sub>6</sub>**)**

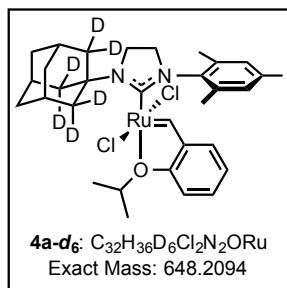

In a nitrogen filled glovebox, imidazolium chloride (**S14**, 86 mg, 0.237 mmol) was weighed into a 20 mL vial with a stir bar. Potassium *tert*-amyloxide (31 mg, 0.249 mmol) was added and the solids were suspended in hexanes (5.7 mL). The mixture was stirred at ambient temperature until all of the solids had dissolved, indicating complete deprotonation of the imidazolium. To this solution was added dichloro(*o*-isopropoxyphenylmethylene)(tricyclohexylphosphine)ruthenium(II) (136 mg, 0.226 mmol). The brown mixture was sealed, removed from the glovebox, and warmed to 60 °C. The solution was stirred until

the brown color disappeared and was replaced by a green precipitate. The mixture was filtered through Celite with extra hexanes (2 mL) to collect a green solid. The solid was eluted with dichloromethane (2 mL) into a clean flask to provide 140 mg (95%) of ruthenium NHC complex **4a-*d*<sub>6</sub>** as a green solid. <sup>1</sup>H NMR (500 MHz, C<sub>6</sub>D<sub>6</sub>) δ 17.11 (s, 1H), 7.20 (ddd, *J* = 8.6, 7.4, 1.7 Hz, 1H), 7.12 (dd, *J* = 7.6, 1.7 Hz, 1H), 6.85 (s, 2H), 6.73 (dd, *J* = 7.8, 7.0 Hz, 1H), 6.48 (d, *J* = 8.3 Hz, 1H), 4.59 (hept, *J* = 6.2 Hz, 1H), 3.36–3.25 (m, 4H), 2.34 (s, 6H), 2.29 (s, 3H), 2.24 (s, 3H), 1.89 (dt, *J* = 13.3, 3.6 Hz, 3H), 1.67 (d, *J* = 12.8 Hz, 3H), 1.57 (d, *J* = 6.1 Hz, 6H); <sup>13</sup>C NMR (126 MHz, C<sub>6</sub>D<sub>6</sub>) δ 209.7, 152.8, 146.4, 140.3, 138.5, 138.3, 130.0, 129.9, 127.9, 123.3, 122.5, 113.6, 74.2, 56.7, 51.1, 44.5, 41.3, 36.3, 36.3, 30.3, 30.2, 22.5, 21.2, 18.6; HRMS (FAB) *m/z* calculated for C<sub>32</sub>H<sub>37</sub>RuON<sub>2</sub>Cl<sub>2</sub>D<sub>6</sub> ([M+H<sup>+</sup>]<sup>+</sup>) 649.2193, found 649.2193.

**(1-(adamant-1-yl-2,2,8,8,9,9-*d*<sub>6</sub>)-3-(2,4,6-trimethylphenyl)-2-imidazolidinylidene)bistriflato(*o*-isopropoxyphenylmethylidene)ruthenium (**7a-*d*<sub>6</sub>**)**

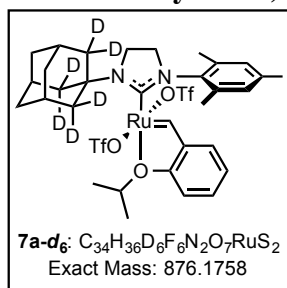

In a nitrogen filled glovebox, ruthenium dichloride **4a-*d*<sub>6</sub>** (50 mg, 0.0771 mmol) and silver trifluoromethanesulfonate (79 mg, 0.308 mmol) were weighed into a 20 mL vial equipped with a stirbar. The reagents were suspended in benzene (2.6 mL) and stirred at ambient temperature for 24 hours. The reaction progress was followed by <sup>1</sup>H NMR spectroscopy. Upon completion, the reaction mixture was filtered through Celite with benzene (2 mL), concentrated, filtered through silica gel with dichloromethane (2 mL), and concentrated again to

provide 45 mg (67%) of bistriflato complex **7a-*d*<sub>6</sub>** as a green solid. <sup>1</sup>H NMR (500 MHz, C<sub>6</sub>D<sub>6</sub>) δ 18.89 (d, *J* = 0.8 Hz, 1H), 7.12 (ddd, *J* = 8.5, 7.3, 1.7 Hz, 1H), 7.09 (dd, *J* = 7.6, 1.7 Hz, 1H), 6.86 (s, 2H), 6.70 (td, *J* = 7.5, 0.8 Hz, 1H), 6.54 (d, *J* = 8.4 Hz, 1H), 4.69 (hept, *J* = 6.2 Hz, 1H), 3.23–3.11 (m, 4H), 2.37 (s, 3H), 2.21 (d, *J* = 2.6 Hz, 9H), 1.95 (d, *J* = 13.0 Hz, 3H), 1.80–1.70 (m, 3H), 1.40 (d, *J* = 6.1 Hz, 6H); <sup>13</sup>C NMR (126 MHz, C<sub>6</sub>D<sub>6</sub>) δ 202.3, 154.8, 147.1, 139.1, 138.8, 138.0, 133.9, 130.3, 123.2, 122.9, 117.1, 114.7, 76.1, 51.6, 44.4, 36.1, 30.0, 29.9, 21.6, 21.0, 18.1; HRMS (FAB) *m/z* calculated for C<sub>34</sub>H<sub>37</sub>RuO<sub>7</sub>N<sub>2</sub>S<sub>2</sub>F<sub>6</sub>D<sub>6</sub> ([M+H<sup>+</sup>]<sup>+</sup>) 877.1836, found 877.1805.

**(1-(adamant-1-yl-2,2,8,8,9,9- $d_6$ )-3-(2,4,6-trimethylphenyl)-2-imidazolidinylidene)bispivalato(*o*-isopropoxyphenylmethylidene)ruthenium (6a- $d_6$ )**

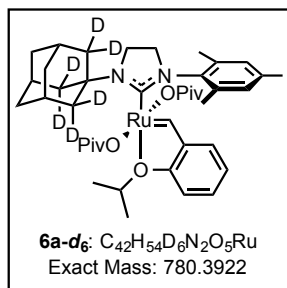

Bispivalato complex **6a- $d_6$**  was observed while conducting kinetics experiments described above; <sup>1</sup>H NMR matched that of  $d_0$ -complex **6a**. HRMS (FAB) *m/z* calculated for C<sub>42</sub>H<sub>54</sub>RuO<sub>5</sub>N<sub>2</sub>D<sub>6</sub>Na ([M+Na<sup>+</sup>]<sup>+</sup>) 803.3820, found 803.3789.

**$d_6$ -Cyclometalated Pivalate (3a- $d_6$ )**

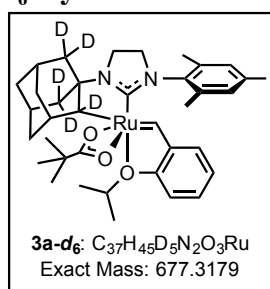

Cyclometalated complex **3a- $d_6$**  was isolated from kinetics experiments by concentrating the reaction mixture, filtering through Celite with benzene to remove excess sodium pivalate and concentrating. The crude solid was then triturated with pentanes to remove pivalic acid; <sup>1</sup>H NMR (500 MHz, C<sub>6</sub>D<sub>6</sub>) δ 14.86 (s, 1H), 7.47 (dd, *J* = 7.5, 1.7 Hz, 1H), 7.26 (ddd, *J* = 8.3, 7.4, 1.7 Hz, 1H), 6.90 (td, *J* = 7.4, 0.9 Hz, 1H), 6.82 (s, 1H), 6.74 (s, 1H), 6.70 (d, *J* = 8.3 Hz, 1H), 4.80 (hept, *J* = 6.5 Hz, 1H), 4.18 (s, 0H), 3.48–3.34 (m, 2H), 3.31–3.22 (m, 1H), 3.21–3.12 (m, 1H), 2.53 (s, 1H), 2.43 (s, 3H), 2.27 (s, 3H), 2.20 (s, 3H), 2.10 (s, 2H), 1.88–1.77 (m, 1H), 1.64 (s, 1H), 1.58–1.44 (m, 5H), 1.24 (s, 11H), 1.22–1.15 (m, 5H), 0.91–0.84 (m, 1H), 0.66 (d, *J* = 12.4 Hz, 1H); <sup>13</sup>C NMR (126 MHz, C<sub>6</sub>D<sub>6</sub>) δ 154.2, 143.8, 138.0, 137.0, 136.7, 136.4, 129.8, 129.7, 128.1, 127.7, 125.5, 123.2, 123.1, 113.9, 74.4, 51.7, 41.3, 39.5, 38.0, 30.9, 29.8, 28.4, 22.7, 21.6, 21.2, 21.0, 19.2, 18.9, 14.3; LRMS (FAB) *m/z* calculated for C<sub>37</sub>H<sub>45</sub>RuO<sub>3</sub>N<sub>2</sub>D<sub>6</sub> ([M-OPiv<sup>-</sup>]<sup>+</sup>) 576.26, found 576.30.

## **Part 2. Computational Results**

### **Complete Reference of Gaussian 09**

Gaussian 09, Revision B.01, Frisch, M. J.; Trucks, G. W.; Schlegel, H. B.; Scuseria, G. E.; Robb, M. A.; Cheeseman, J. R.; Scalmani, G.; Barone, V.; Mennucci, B.; Petersson, G. A.; Nakatsuji, H.; Caricato, M.; Li, X.; Hratchian, H. P.; Izmaylov, A. F.; Bloino, J.; Zheng, G.; Sonnenberg, J. L.; Hada, M.; Ehara, M.; Toyota, K.; Fukuda, R.; Hasegawa, J.; Ishida, M.; Nakajima, T.; Honda, Y.; Kitao, O.; Nakai, H.; Vreven, T.; Montgomery, J. A., Jr.; Peralta, J. E.; Ogliaro, F.; Bearpark, M.; Heyd, J. J.; Brothers, E.; Kudin, K. N.; Staroverov, V. N.; Kobayashi, R.; Normand, J.; Raghavachari, K.; Rendell, A.; Burant, J. C.; Iyengar, S. S.; Tomasi, J.; Cossi, M.; Rega, N.; Millam, N. J.; Klene, M.; Knox, J. E.; Cross, J. B.; Bakken, V.; Adamo, C.; Jaramillo, J.; Gomperts, R.; Stratmann, R. E.; Yazyev, O.; Austin, A. J.; Cammi, R.; Pomelli, C.; Ochterski, J. W.; Martin, R. L.; Morokuma, K.; Zakrzewski, V. G.; Voth, G. A.; Salvador, P.; Dannenberg, J. J.; Dapprich, S.; Daniels, A. D.; Farkas, Ö.; Foresman, J. B.; Ortiz, J. V.; Cioslowski, J.; Fox, D. J. Gaussian, Inc., Wallingford CT, 2009.

## Details of Computations of Rate Constants in Table 2

The rate constants  $k$  were calculated from transition state theory,

$$k = A \frac{k_B T}{h} e^{\frac{-\Delta G^\ddagger}{RT}} \quad (A = 1)$$

whereas  $\Delta G^\ddagger$  at 313K were used (see below).

| entry | <b>4</b>  | $\Delta G^\ddagger_{313K}$ from <b>6</b> (kcal/mol) | calculated $k$ from <b>6</b> (sec <sup>-1</sup> ) |
|-------|-----------|-----------------------------------------------------|---------------------------------------------------|
| 1     | <b>4a</b> | 23.5                                                | $2.7 \times 10^{-4}$                              |
| 2     | <b>4b</b> | 25.6                                                | $8.4 \times 10^{-6}$                              |
| 3     | <b>4c</b> | 15.2                                                | 165                                               |
| 4     | <b>4d</b> | 23.5                                                | $2.6 \times 10^{-4}$                              |

## Charge Analysis of **6a** and **12a-TS**

Charge analysis shows polarization of the C-H bond and increased positive charge on the carboxylate carbon, as in Table S1.

Table S1. NPA charges of dicarboxylate **6a** and C-H activation transition state structure **12a-TS**

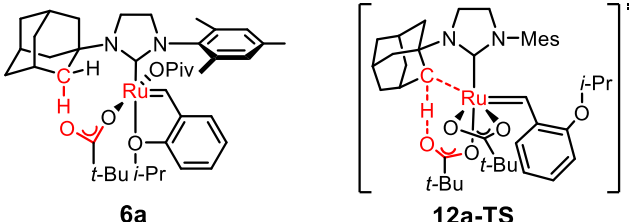

|        | <b>6a</b> | <b>12a-TS</b> |
|--------|-----------|---------------|
| Ru     | +0.19     | +0.03         |
| C      | -0.38     | -0.47         |
| H      | +0.23     | +0.46         |
| O      | -0.72     | -0.75         |
| C(C=O) | +0.85     | +0.89         |



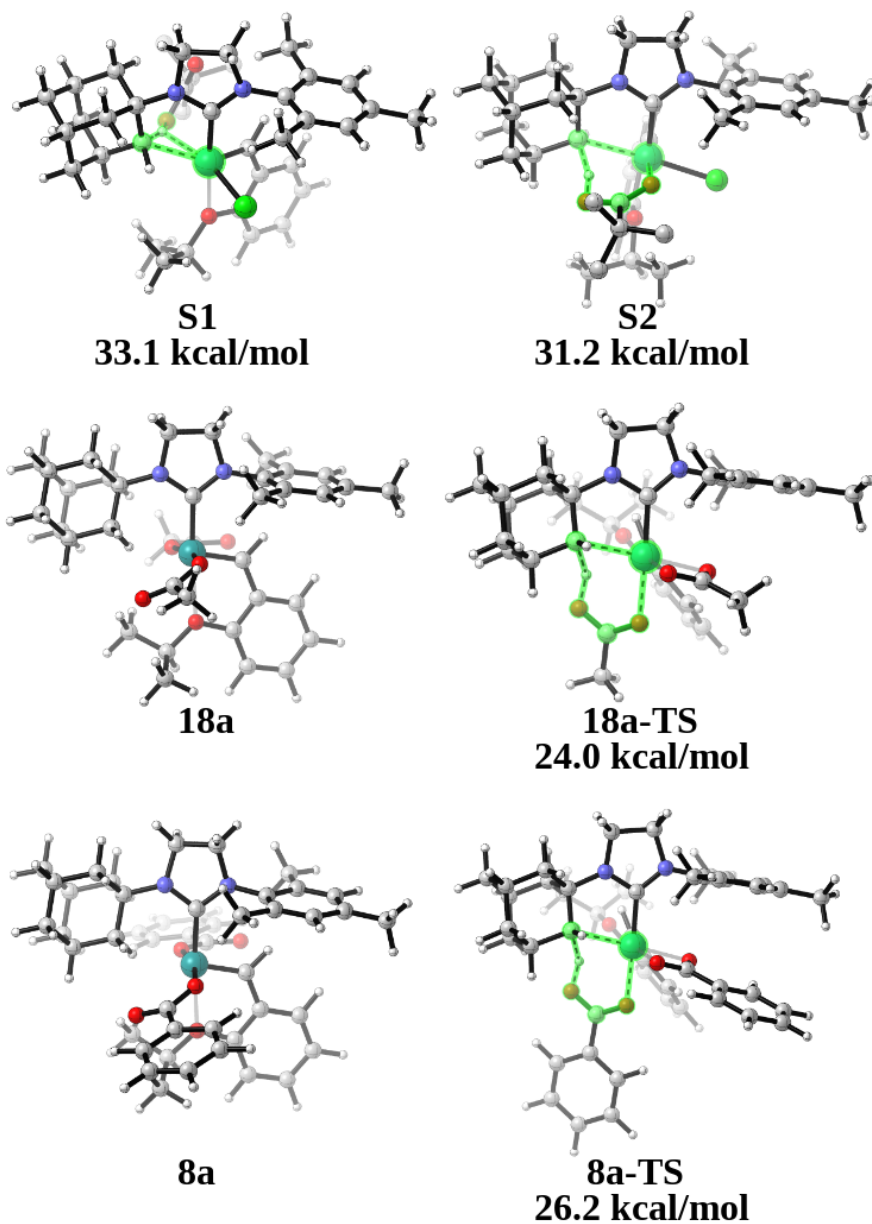

Figure S1. Four-membered (**S1**) and six-membered (**S2**), side-attack C-H activation transition state for monochloro, monovalate substrate, diacetate **18a** and the corresponding C-H activation transition state **18a-TS**, dibenzoate **8a** and the corresponding C-H activation transition state **8a-TS**.

**Data sheet for Complexes and Transition State Geometries**

Table S2. Energies in solvation, E(Solv), and thermal corrections to enthalpy (TCH) and Gibbs free energies (TCG) at 298K

|                | E(Solv)        | TCH      | TCG      |
|----------------|----------------|----------|----------|
| <b>03a-epi</b> | -1869.37864600 | 0.851700 | 0.732280 |
| <b>03a</b>     | -1869.38476169 | 0.851373 | 0.732382 |
| <b>04a</b>     | -2444.14717697 | 0.725122 | 0.615594 |
| <b>05a</b>     | -2330.23014205 | 0.868057 | 0.741943 |
| <b>06a</b>     | -2216.31832920 | 1.011048 | 0.869425 |
| <b>06b</b>     | -2175.80908361 | 0.952833 | 0.805210 |
| <b>06b-TS</b>  | -2175.76144430 | 0.946573 | 0.798423 |
| <b>06c</b>     | -1984.15813308 | 0.897619 | 0.760840 |
| <b>06c-TS</b>  | -1984.12548578 | 0.891037 | 0.752465 |
| <b>06d</b>     | -2334.18729189 | 1.101439 | 0.954810 |
| <b>06d-TS</b>  | -2334.14417225 | 1.095097 | 0.949076 |
| <b>08a</b>     | -2363.83909020 | 0.945826 | 0.805915 |
| <b>08a-ts</b>  | -2363.79182503 | 0.939171 | 0.800348 |
| <b>12a-ts</b>  | -2216.29801603 | 1.009455 | 0.870100 |
| <b>13a</b>     | -2216.30417093 | 1.010139 | 0.865891 |
| <b>14a-tsA</b> | -2216.27388006 | 1.004554 | 0.862389 |
| <b>14a-tsB</b> | -2216.26807284 | 1.005471 | 0.867582 |
| <b>14a-tsC</b> | -2216.25046870 | 1.004130 | 0.861255 |
| <b>14a-tsD</b> | -2216.26446321 | 1.004492 | 0.864077 |
| <b>14a-tsE</b> | -2216.27110069 | 1.004503 | 0.862999 |
| <b>14a-tsF</b> | -2216.26590497 | 1.004704 | 0.861097 |
| <b>15a</b>     | -2216.30518822 | 1.010013 | 0.866241 |
| <b>16a-ts</b>  | -2330.17657440 | 0.860968 | 0.733686 |
| <b>17a</b>     | -2330.20989960 | 0.866698 | 0.738169 |
| <b>18a</b>     | -1980.56126095 | 0.833411 | 0.708765 |
| <b>18a-ts</b>  | -1980.51528189 | 0.826316 | 0.701062 |
| <b>19</b>      | -1869.37741863 | 0.851780 | 0.733992 |
| <b>s1</b>      | -2330.17125327 | 0.861045 | 0.735743 |
| <b>s2</b>      | -2330.17575035 | 0.861844 | 0.737290 |

## The Cartesian Coordinates (Å) for Complexes and Transition State Geometries

| 3a-epi |          |          |          |   |          |          |          |
|--------|----------|----------|----------|---|----------|----------|----------|
|        |          |          |          | H | -2.19589 | 4.06322  | 1.55902  |
| Ru     | -0.39513 | 0.27672  | -0.12367 | C | 1.63899  | -0.05062 | 3.60597  |
| O      | -1.23657 | 2.59841  | 0.45421  | C | 1.65303  | -1.50463 | 4.12033  |
| O      | -0.24126 | -0.58334 | 2.15327  | H | 2.10566  | -1.54573 | 5.11885  |
| O      | 1.34998  | 0.67141  | 1.28422  | H | 0.63641  | -1.90261 | 4.17968  |
| N      | -0.73977 | -2.25821 | -1.42969 | H | 2.23614  | -2.15756 | 3.46317  |
| N      | 1.40499  | -1.78624 | -1.53683 | C | 0.87512  | 0.81571  | 4.63371  |
| C      | 0.20343  | -1.34974 | -1.06045 | H | 0.84517  | 1.86846  | 4.33282  |
| C      | -0.15959 | -3.49662 | -1.95056 | H | -0.15345 | 0.46169  | 4.75640  |
| H      | -0.71694 | -3.87128 | -2.81362 | H | 1.37450  | 0.76243  | 5.60909  |
| H      | -0.14877 | -4.28215 | -1.18075 | C | 3.07285  | 0.47844  | 3.44532  |
| C      | 1.25920  | -3.03272 | -2.31879 | H | 3.60420  | 0.42129  | 4.40393  |
| H      | 2.03338  | -3.75547 | -2.04797 | H | 3.63124  | -0.10299 | 2.70503  |
| H      | 1.35507  | -2.81725 | -3.39192 | H | 3.07558  | 1.51945  | 3.10935  |
| C      | -2.06751 | -2.12341 | -0.81643 | C | -2.13277 | 2.23509  | 2.65046  |
| C      | -2.09841 | -2.81758 | 0.56988  | H | -3.09860 | 1.92194  | 2.24339  |
| H      | -1.28389 | -2.43073 | 1.18928  | H | -1.51011 | 1.34644  | 2.77602  |
| H      | -1.94770 | -3.90071 | 0.44476  | H | -2.30475 | 2.68851  | 3.63321  |
| C      | -3.45156 | -2.55142 | 1.25584  | C | -0.15940 | 3.82185  | 2.26066  |
| H      | -3.46311 | -3.04683 | 2.23592  | H | 0.58469  | 3.02363  | 2.32744  |
| C      | -4.59047 | -3.10807 | 0.37899  | H | 0.23429  | 4.59628  | 1.59463  |
| H      | -4.48288 | -4.19640 | 0.26371  | H | -0.30562 | 4.26555  | 3.25193  |
| H      | -5.56267 | -2.93280 | 0.86046  | C | -0.48390 | 3.35741  | -3.02412 |
| C      | -4.55537 | -2.41829 | -1.00034 | C | -1.36615 | 4.72871  | -0.76022 |
| H      | -5.36454 | -2.81027 | -1.63131 | H | -0.13435 | 2.81156  | -3.89743 |
| C      | -3.19801 | -2.71367 | -1.68703 | H | -1.70318 | 5.29025  | 0.10197  |
| H      | -3.16752 | -2.26455 | -2.68887 | C | -0.78111 | 4.71331  | -3.11938 |
| H      | -3.08170 | -3.80156 | -1.81023 | C | -1.21628 | 5.39379  | -1.98125 |
| C      | -4.74606 | -0.89797 | -0.79760 | H | -1.44516 | 6.45486  | -2.03269 |
| H      | -4.77336 | -0.38439 | -1.76829 | H | -0.66972 | 5.23661  | -4.06454 |
| H      | -5.71523 | -0.71427 | -0.31067 | C | 2.71457  | -1.25796 | -1.27921 |
| C      | -3.58828 | -0.33068 | 0.06791  | C | 3.42487  | -1.76557 | -0.17098 |
| H      | -3.73381 | 0.75024  | 0.19325  | C | 3.31909  | -0.35074 | -2.16374 |
| C      | -2.27847 | -0.59469 | -0.70138 | C | 4.72276  | -1.30995 | 0.06102  |
| H      | -2.45005 | -0.24295 | -1.72384 | C | 4.62442  | 0.08001  | -1.88786 |
| C      | -3.61182 | -1.02869 | 1.44380  | C | 5.33773  | -0.37332 | -0.77925 |
| H      | -2.80010 | -0.65532 | 2.07571  | H | 5.27187  | -1.70016 | 0.91574  |
| H      | -4.56064 | -0.81228 | 1.95672  | H | 5.09403  | 0.78645  | -2.56995 |
| C      | -0.27607 | 1.24392  | -1.70846 | C | 2.63098  | 0.17034  | -3.40306 |
| H      | 0.03185  | 0.82295  | -2.67247 | H | 2.25153  | 1.18604  | -3.24082 |
| C      | -0.61408 | 2.65317  | -1.81009 | H | 3.33376  | 0.21438  | -4.24280 |
| C      | -1.08125 | 3.36358  | -0.67505 | H | 1.78247  | -0.45111 | -3.69910 |
| C      | 0.87538  | 0.00801  | 2.26238  | C | 2.81346  | -2.80994 | 0.73225  |
| C      | -1.47613 | 3.25680  | 1.73469  | H | 1.83495  | -2.50055 | 1.11117  |

|           |          |          |          |   |          |          |          |
|-----------|----------|----------|----------|---|----------|----------|----------|
| H         | 2.66892  | -3.76478 | 0.20885  | C | -3.46360 | -1.84596 | -0.40397 |
| H         | 3.46606  | -3.00729 | 1.58765  | C | -4.79776 | -1.43491 | -0.32419 |
| C         | 6.73084  | 0.13212  | -0.48501 | H | -5.42778 | -1.53020 | -1.20633 |
| H         | 7.37478  | -0.66583 | -0.09809 | C | -5.34359 | -0.90982 | 0.85244  |
| H         | 7.20498  | 0.54677  | -1.38071 | C | -4.51569 | -0.80351 | 1.97224  |
| H         | 6.70986  | 0.92643  | 0.27279  | H | -4.92115 | -0.39919 | 2.89753  |
| <b>3a</b> |          |          |          | C | -3.17681 | -1.20915 | 1.94509  |
| Ru        | 0.37617  | 0.14022  | -0.12421 | C | -2.90811 | -2.37130 | -1.70856 |
| O         | 1.37393  | 2.41322  | -0.14100 | H | -2.10974 | -1.71983 | -2.08107 |
| O         | -0.94384 | 0.46691  | -2.15291 | H | -3.69377 | -2.41337 | -2.46904 |
| O         | -1.58436 | 1.25836  | -0.19672 | H | -2.49274 | -3.38163 | -1.61317 |
| N         | 0.73299  | -2.70390 | 0.11320  | C | -6.78138 | -0.44655 | 0.90006  |
| N         | -1.33301 | -2.28172 | 0.73007  | H | -7.18692 | -0.49985 | 1.91605  |
| C         | -0.18882 | -1.71665 | 0.25230  | H | -7.42018 | -1.05100 | 0.24668  |
| C         | 0.30356  | -3.98726 | 0.66946  | H | -6.87127 | 0.59624  | 0.56750  |
| H         | 0.83638  | -4.20664 | 1.60445  | C | -2.32031 | -1.06285 | 3.17915  |
| H         | 0.49215  | -4.81088 | -0.02663 | H | -1.70867 | -1.95217 | 3.36702  |
| C         | -1.19745 | -3.74407 | 0.90944  | H | -2.94051 | -0.88231 | 4.06280  |
| H         | -1.82413 | -4.27749 | 0.18563  | H | -1.63246 | -0.21646 | 3.07099  |
| H         | -1.52338 | -4.03650 | 1.91282  | C | 0.82054  | 0.43541  | 1.65347  |
| C         | 2.11802  | -2.33167 | -0.17982 | H | 0.68602  | -0.27621 | 2.47849  |
| C         | 2.81091  | -3.32962 | -1.13751 | C | 1.15053  | 1.77783  | 2.11319  |
| H         | 2.21857  | -3.42595 | -2.05695 | C | 1.17437  | 2.10820  | 3.48182  |
| H         | 2.88176  | -4.33148 | -0.68673 | H | 1.00424  | 1.31318  | 4.20415  |
| C         | 4.23209  | -2.80619 | -1.45860 | C | 1.38451  | 3.41425  | 3.91564  |
| H         | 4.71737  | -3.49944 | -2.15859 | H | 1.39364  | 3.64614  | 4.97666  |
| C         | 5.05683  | -2.71973 | -0.15802 | C | 1.56473  | 4.42413  | 2.96992  |
| H         | 5.15008  | -3.71439 | 0.30117  | H | 1.71047  | 5.45267  | 3.28872  |
| H         | 6.07560  | -2.37561 | -0.38357 | C | 1.56333  | 4.13275  | 1.60169  |
| C         | 4.36943  | -1.74688 | 0.82099  | H | 1.70291  | 4.93848  | 0.89189  |
| H         | 4.94523  | -1.69377 | 1.75486  | C | 1.37900  | 2.81660  | 1.17429  |
| C         | 2.94897  | -2.25697 | 1.12634  | C | 1.82299  | 3.34102  | -1.17709 |
| H         | 3.00126  | -3.25238 | 1.59104  | H | 1.22910  | 4.25643  | -1.06231 |
| H         | 2.45092  | -1.58683 | 1.83321  | C | 3.31572  | 3.64660  | -1.03313 |
| C         | 4.26229  | -0.34321 | 0.19131  | H | 3.90044  | 2.73029  | -1.15966 |
| H         | 5.26749  | 0.04984  | -0.01938 | H | 3.56928  | 4.08103  | -0.06370 |
| H         | 3.78260  | 0.34646  | 0.89615  | H | 3.61632  | 4.35496  | -1.81343 |
| C         | 3.44397  | -0.42409 | -1.11195 | C | 1.51206  | 2.71652  | -2.53030 |
| H         | 3.40075  | 0.56694  | -1.57590 | H | 2.16898  | 1.86533  | -2.73107 |
| C         | 2.01627  | -0.95048 | -0.86808 | H | 1.67884  | 3.46634  | -3.31210 |
| H         | 1.56631  | -1.12954 | -1.86433 | H | 0.48299  | 2.36349  | -2.59213 |
| C         | 4.15301  | -1.39945 | -2.08930 | C | -1.74596 | 1.15996  | -1.45377 |
| H         | 3.60446  | -1.43887 | -3.04020 | C | -2.88839 | 1.94727  | -2.13322 |
| H         | 5.16789  | -1.04275 | -2.31915 | C | -3.53799 | 1.08190  | -3.22878 |
| C         | -2.66049 | -1.73124 | 0.74792  | H | -4.04676 | 0.21439  | -2.79472 |
|           |          |          |          | H | -2.78484 | 0.71824  | -3.93300 |

|           |          |          |          |    |          |          |          |
|-----------|----------|----------|----------|----|----------|----------|----------|
| H         | -4.28413 | 1.66671  | -3.78159 | C  | -1.87669 | -2.54286 | 0.09090  |
| C         | -3.93839 | 2.38234  | -1.09744 | C  | -2.52286 | -2.66570 | -1.15372 |
| H         | -4.74347 | 2.94127  | -1.59220 | C  | -3.91441 | -2.81725 | -1.16010 |
| H         | -3.49331 | 3.02099  | -0.32929 | H  | -4.42622 | -2.90036 | -2.11662 |
| H         | -4.37651 | 1.51601  | -0.59283 | C  | -4.66131 | -2.86047 | 0.02219  |
| C         | -2.26785 | 3.20278  | -2.78895 | C  | -3.98193 | -2.74496 | 1.23999  |
| H         | -3.05591 | 3.81281  | -3.24774 | H  | -4.54643 | -2.77296 | 2.16974  |
| H         | -1.55292 | 2.92836  | -3.57139 | C  | -2.59255 | -2.59472 | 1.30190  |
| H         | -1.75198 | 3.82371  | -2.04667 | C  | -1.75715 | -2.58181 | -2.45323 |
| <b>4a</b> |          |          |          | H  | -1.03280 | -3.39986 | -2.55572 |
| Ru        | -0.08023 | 0.58100  | 0.01346  | H  | -1.19568 | -1.64350 | -2.53193 |
| O         | -0.70564 | 2.94347  | -0.06441 | H  | -2.44113 | -2.64338 | -3.30511 |
| N         | 1.66139  | -1.83467 | 0.20683  | C  | -6.15954 | -3.05865 | -0.01177 |
| N         | -0.44582 | -2.45764 | 0.13623  | H  | -6.65417 | -2.51960 | 0.80357  |
| C         | 0.37964  | -1.37200 | 0.10900  | H  | -6.42131 | -4.11984 | 0.09667  |
| C         | 1.71345  | -3.29884 | 0.39886  | H  | -6.58904 | -2.71335 | -0.95806 |
| H         | 2.02745  | -3.53292 | 1.42204  | C  | -1.89232 | -2.46417 | 2.63313  |
| H         | 2.42408  | -3.76206 | -0.29066 | H  | -1.14891 | -3.25864 | 2.77956  |
| C         | 0.27892  | -3.73709 | 0.13231  | H  | -2.61271 | -2.53129 | 3.45408  |
| H         | 0.15982  | -4.23793 | -0.83690 | H  | -1.36140 | -1.50900 | 2.71699  |
| H         | -0.11382 | -4.40196 | 0.90719  | C  | -1.92144 | 0.54236  | -0.15742 |
| C         | 2.96439  | -1.12727 | 0.04837  | H  | -2.51035 | -0.36949 | -0.20753 |
| C         | 3.49881  | -1.33774 | -1.39405 | C  | -2.69982 | 1.75327  | -0.26516 |
| H         | 2.77499  | -0.91896 | -2.10178 | C  | -4.09851 | 1.71241  | -0.43500 |
| H         | 3.58823  | -2.41187 | -1.60783 | H  | -4.58270 | 0.74027  | -0.48147 |
| C         | 4.87749  | -0.66255 | -1.55846 | C  | -4.84324 | 2.88114  | -0.54178 |
| H         | 5.23510  | -0.83037 | -2.58256 | H  | -5.92031 | 2.83862  | -0.67189 |
| C         | 5.87639  | -1.26727 | -0.55108 | C  | -4.18800 | 4.11430  | -0.47750 |
| H         | 5.99718  | -2.34410 | -0.73624 | H  | -4.75821 | 5.03596  | -0.55751 |
| H         | 6.86697  | -0.80968 | -0.67805 | C  | -2.80271 | 4.19323  | -0.30816 |
| C         | 5.36641  | -1.02997 | 0.88597  | H  | -2.32944 | 5.16558  | -0.25701 |
| H         | 6.06754  | -1.47265 | 1.60557  | C  | -2.05929 | 3.01545  | -0.20668 |
| C         | 3.99084  | -1.70767 | 1.06041  | C  | 0.07673  | 4.15687  | 0.15371  |
| H         | 3.61678  | -1.56036 | 2.08224  | H  | -0.30010 | 4.90777  | -0.54998 |
| H         | 4.11636  | -2.78574 | 0.90915  | C  | 1.51399  | 3.82482  | -0.21221 |
| C         | 5.23457  | 0.48114  | 1.14602  | H  | 1.93529  | 3.11747  | 0.50751  |
| H         | 4.89521  | 0.66200  | 2.17490  | H  | 2.11508  | 4.74069  | -0.18844 |
| H         | 6.21124  | 0.97243  | 1.03762  | H  | 1.56568  | 3.38846  | -1.21373 |
| C         | 4.22882  | 1.07154  | 0.14142  | C  | -0.08083 | 4.62327  | 1.59851  |
| H         | 4.10623  | 2.14516  | 0.32970  | H  | -1.11929 | 4.87321  | 1.83566  |
| C         | 2.85535  | 0.38376  | 0.32430  | H  | 0.53280  | 5.51546  | 1.76859  |
| H         | 2.47644  | 0.55345  | 1.33628  | H  | 0.24303  | 3.82837  | 2.27710  |
| C         | 4.73588  | 0.85032  | -1.29768 | H  | 2.16813  | 0.84696  | -0.39885 |
| H         | 4.03532  | 1.29219  | -2.01766 | Cl | 0.07821  | 0.82000  | 2.42783  |
| H         | 5.70413  | 1.35112  | -1.43583 | Cl | 0.42961  | 0.71011  | -2.37073 |

**5a**

|    |          |          |          |   |          |          |          |
|----|----------|----------|----------|---|----------|----------|----------|
| Ru | -0.09315 | 0.29768  | -0.43993 | C | -2.44079 | -3.16831 | -2.17271 |
| O  | -0.60075 | 2.63928  | -1.14913 | H | -1.85467 | -4.09544 | -2.22495 |
| O  | 1.45104  | 2.46251  | 1.33450  | H | -1.78374 | -2.35568 | -2.50359 |
| O  | 0.00562  | 0.75818  | 1.61711  | H | -3.26353 | -3.26221 | -2.88800 |
| N  | 1.45500  | -2.23265 | -0.09847 | C | -6.36204 | -2.73585 | 0.99624  |
| N  | -0.69375 | -2.66996 | 0.05442  | H | -6.66866 | -2.00817 | 1.75543  |
| C  | 0.21131  | -1.65831 | -0.09453 | H | -6.66162 | -3.72818 | 1.35941  |
| C  | 1.36178  | -3.70082 | -0.23006 | H | -6.93436 | -2.53763 | 0.08396  |
| H  | 2.11597  | -4.21159 | 0.36858  | C | -1.66575 | -2.01167 | 2.71902  |
| H  | 1.49300  | -3.99149 | -1.28021 | H | -0.91406 | -2.79365 | 2.88524  |
| C  | -0.05082 | -3.97800 | 0.25393  | H | -2.22859 | -1.89371 | 3.65029  |
| H  | -0.56099 | -4.75399 | -0.32220 | H | -1.12457 | -1.07881 | 2.52080  |
| H  | -0.08450 | -4.25815 | 1.31613  | C | -1.94253 | 0.36530  | -0.52082 |
| C  | 2.79553  | -1.60709 | -0.26337 | H | -2.59160 | -0.46973 | -0.26907 |
| C  | 3.37916  | -1.89352 | -1.67206 | C | -2.65565 | 1.54497  | -0.94197 |
| H  | 2.69807  | -1.48850 | -2.42875 | C | -4.06311 | 1.53936  | -1.04323 |
| H  | 3.45364  | -2.97673 | -1.83729 | H | -4.59282 | 0.63044  | -0.76916 |
| C  | 4.78454  | -1.26439 | -1.80064 | C | -4.75733 | 2.65465  | -1.49375 |
| H  | 5.17611  | -1.48066 | -2.80300 | H | -5.84019 | 2.63775  | -1.57092 |
| C  | 5.72272  | -1.86632 | -0.73444 | C | -4.03998 | 3.80015  | -1.85215 |
| H  | 5.81600  | -2.95194 | -0.88019 | H | -4.56802 | 4.68032  | -2.20946 |
| H  | 6.73160  | -1.44370 | -0.83626 | C | -2.64703 | 3.84617  | -1.75750 |
| C  | 5.16478  | -1.56448 | 0.67228  | H | -2.12981 | 4.75510  | -2.03495 |
| H  | 5.82095  | -2.00604 | 1.43394  | C | -1.95027 | 2.72370  | -1.29731 |
| C  | 3.75975  | -2.18811 | 0.80954  | C | 0.24247  | 3.75538  | -1.59987 |
| H  | 3.34668  | -1.99439 | 1.80826  | H | -0.20855 | 4.12012  | -2.52939 |
| H  | 3.85192  | -3.27518 | 0.70015  | C | 1.62091  | 3.19351  | -1.90572 |
| C  | 5.07418  | -0.04127 | 0.87639  | H | 2.07308  | 2.81515  | -0.98621 |
| H  | 4.69751  | 0.18716  | 1.88264  | H | 2.25060  | 3.99748  | -2.30477 |
| H  | 6.07083  | 0.41351  | 0.79544  | H | 1.55596  | 2.39158  | -2.64568 |
| C  | 4.13265  | 0.55031  | -0.18834 | C | 0.27407  | 4.84762  | -0.53349 |
| H  | 4.02683  | 1.62939  | -0.03276 | H | -0.72723 | 5.21723  | -0.29099 |
| C  | 2.73424  | -0.08812 | -0.04528 | H | 0.86820  | 5.69413  | -0.89773 |
| H  | 2.32879  | 0.13510  | 0.94202  | H | 0.73642  | 4.45212  | 0.37438  |
| C  | 4.68868  | 0.26097  | -1.59648 | C | 0.68170  | 1.79052  | 2.03303  |
| H  | 4.03551  | 0.70307  | -2.35988 | C | 0.47977  | 2.11136  | 3.53790  |
| H  | 5.67953  | 0.72125  | -1.71312 | C | 1.02223  | 0.92732  | 4.36731  |
| C  | -2.10806 | -2.61900 | 0.28670  | H | 2.09153  | 0.77044  | 4.17727  |
| C  | -2.97363 | -2.91944 | -0.78129 | H | 0.49335  | 0.00072  | 4.12615  |
| C  | -4.35020 | -2.93687 | -0.53021 | H | 0.90010  | 1.12632  | 5.43956  |
| H  | -5.02938 | -3.15636 | -1.35140 | C | 1.24465  | 3.39227  | 3.90591  |
| C  | -4.87334 | -2.67604 | 0.74103  | H | 2.31140  | 3.29293  | 3.68533  |
| C  | -3.98049 | -2.38523 | 1.77861  | H | 1.12733  | 3.60708  | 4.97563  |
| H  | -4.37034 | -2.17425 | 2.77235  | H | 0.87231  | 4.25291  | 3.34085  |
| C  | -2.59597 | -2.35796 | 1.58096  | C | -1.02499 | 2.29689  | 3.82150  |
|    |          |          |          | H | -1.18808 | 2.51984  | 4.88373  |

|           |          |          |          |   |          |          |          |
|-----------|----------|----------|----------|---|----------|----------|----------|
| H         | -1.58810 | 1.39561  | 3.56458  | H | 4.94630  | -3.31301 | -1.30892 |
| H         | -1.43555 | 3.13033  | 3.23827  | C | 4.93221  | -1.48260 | -2.44013 |
| H         | 2.09725  | 0.38191  | -0.81273 | C | 4.10841  | -0.50426 | -3.00524 |
| Cl        | 0.24662  | -0.15120 | -2.82372 | H | 4.55803  | 0.30581  | -3.57583 |
| <b>6a</b> |          |          |          | C | 2.71582  | -0.53821 | -2.87559 |
| Ru        | 0.03286  | 0.25428  | 0.22681  | C | 2.33678  | -3.74045 | -0.77664 |
| O         | 0.52313  | 1.64096  | 2.23171  | H | 1.53314  | -4.25170 | -1.31979 |
| O         | -1.29696 | 3.12914  | -0.00297 | H | 1.91581  | -3.37077 | 0.16569  |
| O         | 0.29596  | 1.92736  | -1.04651 | H | 3.10170  | -4.48632 | -0.53860 |
| N         | -1.44942 | -1.33763 | -1.80829 | C | 6.43532  | -1.40398 | -2.57703 |
| N         | 0.71069  | -1.70549 | -2.04530 | H | 6.87331  | -0.77398 | -1.79130 |
| C         | -0.21072 | -0.99738 | -1.31927 | H | 6.72784  | -0.96889 | -3.53896 |
| C         | -1.37288 | -2.47940 | -2.74049 | H | 6.89804  | -2.39326 | -2.49648 |
| H         | -2.02145 | -2.33960 | -3.60503 | C | 1.86886  | 0.52856  | -3.52508 |
| H         | -1.66968 | -3.40669 | -2.23222 | H | 1.12089  | 0.09712  | -4.20287 |
| C         | 0.09592  | -2.48773 | -3.12902 | H | 2.49539  | 1.20404  | -4.11621 |
| H         | 0.52485  | -3.49208 | -3.17595 | H | 1.33023  | 1.11930  | -2.77627 |
| H         | 0.27425  | -1.99625 | -4.09507 | C | 1.82679  | -0.07202 | 0.57405  |
| C         | -2.79452 | -0.93996 | -1.30627 | H | 2.44117  | -0.76810 | 0.01291  |
| C         | -3.36619 | -1.99486 | -0.32530 | C | 2.54500  | 0.63290  | 1.61518  |
| H         | -2.68220 | -2.08673 | 0.52448  | C | 3.92639  | 0.43568  | 1.80055  |
| H         | -3.42425 | -2.97614 | -0.81607 | H | 4.43975  | -0.25138 | 1.13300  |
| C         | -4.77657 | -1.57144 | 0.14643  | C | 4.61826  | 1.08686  | 2.81586  |
| H         | -5.16067 | -2.33085 | 0.84005  | H | 5.68421  | 0.92728  | 2.94740  |
| C         | -5.71883 | -1.45286 | -1.06889 | C | 3.92008  | 1.94092  | 3.67250  |
| H         | -5.80302 | -2.42168 | -1.58161 | H | 4.44384  | 2.45181  | 4.47618  |
| H         | -6.72975 | -1.17884 | -0.73804 | C | 2.54764  | 2.15864  | 3.51936  |
| C         | -5.17358 | -0.38470 | -2.03939 | H | 2.04162  | 2.83033  | 4.20027  |
| H         | -5.83000 | -0.31218 | -2.91653 | C | 1.86051  | 1.51435  | 2.48651  |
| C         | -3.76636 | -0.80294 | -2.51291 | C | -0.32533 | 2.35599  | 3.19034  |
| H         | -3.36243 | -0.06860 | -3.22298 | H | 0.04903  | 2.08677  | 4.18523  |
| H         | -3.85793 | -1.75682 | -3.04450 | C | -1.73947 | 1.82154  | 3.02350  |
| C         | -5.09574 | 0.97700  | -1.32782 | H | -2.12621 | 2.11307  | 2.04410  |
| H         | -4.72792 | 1.74748  | -2.01885 | H | -2.38124 | 2.25219  | 3.80086  |
| H         | -6.09486 | 1.29217  | -0.99752 | H | -1.75441 | 0.73232  | 3.11227  |
| C         | -4.15132 | 0.85181  | -0.11918 | C | -0.24336 | 3.86387  | 2.96319  |
| H         | -4.05368 | 1.82131  | 0.38165  | H | 0.78280  | 4.23731  | 3.02926  |
| C         | -2.74699 | 0.42549  | -0.60083 | H | -0.84088 | 4.37798  | 3.72554  |
| H         | -2.32706 | 1.18435  | -1.26332 | H | -0.64551 | 4.10215  | 1.97556  |
| C         | -4.69638 | -0.20653 | 0.86077  | C | -0.37749 | 3.01694  | -0.82697 |
| H         | -4.04426 | -0.27793 | 1.74054  | C | 0.02486  | 4.21247  | -1.73254 |
| H         | -5.69158 | 0.08926  | 1.22002  | C | -0.45719 | 3.90481  | -3.16794 |
| C         | 2.14300  | -1.58489 | -2.12751 | H | -1.54637 | 3.77604  | -3.19643 |
| C         | 2.93822  | -2.60806 | -1.57450 | H | 0.00550  | 2.99208  | -3.55518 |
| C         | 4.32589  | -2.53023 | -1.74026 | H | -0.20080 | 4.73224  | -3.84175 |
|           |          |          |          | C | -0.65121 | 5.49867  | -1.23159 |

|              |          |          |          |   |          |          |          |
|--------------|----------|----------|----------|---|----------|----------|----------|
| H            | -1.73865 | 5.38847  | -1.20261 | C | 2.55265  | -0.25230 | -2.20110 |
| H            | -0.40058 | 6.33835  | -1.89225 | C | 4.36599  | -3.31477 | -0.73185 |
| H            | -0.31953 | 5.75234  | -0.21893 | H | 5.36721  | -3.29819 | -0.29016 |
| C            | 1.55628  | 4.38782  | -1.72425 | H | 4.33126  | -4.18150 | -1.40708 |
| H            | 1.84664  | 5.22839  | -2.36760 | H | 3.64557  | -3.48816 | 0.07417  |
| H            | 2.06058  | 3.48635  | -2.08100 | C | 6.14176  | 0.83919  | -2.97117 |
| H            | 1.92289  | 4.59944  | -0.71233 | H | 6.01743  | 1.90086  | -2.72963 |
| H            | -2.13001 | 0.37419  | 0.31005  | H | 6.25156  | 0.76737  | -4.06190 |
| O            | -0.66627 | -1.16749 | 1.59108  | H | 7.08192  | 0.49900  | -2.52442 |
| C            | 0.09315  | -2.03944 | 2.18925  | C | 1.17462  | 0.32460  | -2.29424 |
| O            | 1.30283  | -2.19310 | 1.98264  | H | 0.41719  | -0.39982 | -2.60000 |
| C            | -0.62306 | -2.97050 | 3.20700  | H | 1.16173  | 1.08323  | -3.09098 |
| C            | -1.92978 | -2.36281 | 3.74113  | H | 0.93863  | 1.51316  | -1.56871 |
| H            | -2.39768 | -3.05125 | 4.45647  | C | -1.24959 | 0.41687  | -0.39033 |
| H            | -1.74340 | -1.41655 | 4.26158  | H | -1.64746 | 0.08715  | -1.35479 |
| H            | -2.64589 | -2.16679 | 2.93874  | C | -2.22612 | 1.16560  | 0.38023  |
| C            | -0.92579 | -4.29388 | 2.46692  | C | -2.00006 | 1.49426  | 1.73655  |
| H            | -1.39864 | -5.01171 | 3.14878  | H | -1.07944 | 1.14933  | 2.19158  |
| H            | -1.60739 | -4.13159 | 1.62343  | C | -2.92921 | 2.21439  | 2.47831  |
| H            | -0.00367 | -4.74220 | 2.08215  | H | -2.73526 | 2.44550  | 3.52157  |
| C            | 0.33587  | -3.25179 | 4.37939  | C | -4.11491 | 2.63213  | 1.87083  |
| H            | 1.28079  | -3.66221 | 4.01629  | H | -4.85101 | 3.19634  | 2.43843  |
| H            | 0.56158  | -2.33278 | 4.93344  | C | -4.37933 | 2.33250  | 0.53314  |
| H            | -0.11786 | -3.96495 | 5.07906  | H | -5.31031 | 2.66841  | 0.09300  |
| <b>6b-TS</b> |          |          |          | C | -3.44904 | 1.60474  | -0.21951 |
| Ru           | 0.56407  | 0.12606  | 0.01509  | C | -4.73972 | 1.79949  | -2.28463 |
| O            | -3.61685 | 1.29745  | -1.53486 | H | -4.95497 | 2.82254  | -1.95115 |
| O            | 2.60601  | -0.26462 | 1.21917  | C | -5.96564 | 0.90801  | -2.08053 |
| O            | 0.59543  | -0.29601 | 2.12251  | H | -5.75637 | -0.10565 | -2.44012 |
| N            | -0.41065 | -2.76306 | -0.64973 | H | -6.82119 | 1.30206  | -2.64087 |
| N            | 1.65970  | -2.31741 | -1.22772 | H | -6.24692 | 0.84267  | -1.02539 |
| C            | 0.55308  | -1.80550 | -0.61489 | C | -4.28158 | 1.84224  | -3.73889 |
| C            | 0.07225  | -4.03014 | -1.23270 | H | -3.40064 | 2.48225  | -3.84555 |
| H            | -0.65911 | -4.44204 | -1.93303 | H | -5.07999 | 2.23552  | -4.37760 |
| H            | 0.23908  | -4.76865 | -0.43727 | H | -4.02188 | 0.83724  | -4.08938 |
| C            | 1.37503  | -3.59738 | -1.90712 | C | 1.87919  | -0.31964 | 2.24180  |
| H            | 2.18020  | -4.32000 | -1.76872 | C | 2.51046  | -0.42155 | 3.63913  |
| H            | 1.25061  | -3.42136 | -2.98456 | C | 3.31088  | -1.74133 | 3.69739  |
| C            | 2.78417  | -1.52273 | -1.63010 | H | 4.05506  | -1.77529 | 2.89629  |
| C            | 4.08711  | -2.01047 | -1.44278 | H | 2.65076  | -2.61115 | 3.59044  |
| C            | 5.16012  | -1.22905 | -1.88870 | H | 3.82806  | -1.82902 | 4.66083  |
| H            | 6.17216  | -1.60148 | -1.74295 | C | 3.47610  | 0.77136  | 3.80586  |
| C            | 4.96951  | 0.02083  | -2.48091 | H | 4.22689  | 0.77303  | 3.01107  |
| C            | 3.66103  | 0.49546  | -2.61410 | H | 3.98641  | 0.71231  | 4.77530  |
| H            | 3.48951  | 1.47931  | -3.04619 | H | 2.93399  | 1.72340  | 3.76358  |
|              |          |          |          | C | 1.44404  | -0.39647 | 4.74500  |



|           |          |          |          |   |          |          |          |
|-----------|----------|----------|----------|---|----------|----------|----------|
| H         | 1.92477  | -0.46188 | 5.72922  | N | 1.09487  | -0.29438 | -2.58581 |
| H         | 0.74551  | -1.23397 | 4.65051  | C | 0.02980  | -0.23933 | -1.73504 |
| H         | 0.85928  | 0.52820  | 4.71045  | C | -0.82126 | -0.37205 | -3.95382 |
| O         | 0.86677  | 2.16254  | 0.73082  | H | -1.19748 | 0.54560  | -4.42247 |
| C         | 1.00494  | 3.06210  | -0.14203 | H | -1.32107 | -1.22294 | -4.42783 |
| O         | 0.98991  | 2.81768  | -1.39605 | C | 0.70676  | -0.47186 | -4.00003 |
| C         | 1.20498  | 4.52311  | 0.29096  | H | 1.05655  | -1.44327 | -4.36930 |
| C         | 1.14515  | 4.65255  | 1.82043  | H | 1.16674  | 0.30616  | -4.61746 |
| H         | 1.27983  | 5.70170  | 2.11140  | C | 2.50612  | -0.28241 | -2.31366 |
| H         | 0.18218  | 4.30666  | 2.20867  | C | 3.18712  | -1.50300 | -2.14271 |
| H         | 1.92878  | 4.05793  | 2.29991  | C | 4.57432  | -1.46377 | -1.95474 |
| C         | 2.58277  | 4.98718  | -0.23131 | H | 5.10654  | -2.40151 | -1.80961 |
| H         | 2.75164  | 6.03730  | 0.03642  | C | 5.28804  | -0.26194 | -1.94185 |
| H         | 3.39188  | 4.39191  | 0.20839  | C | 4.57936  | 0.92967  | -2.12982 |
| H         | 2.63943  | 4.89094  | -1.31945 | H | 5.11670  | 1.87588  | -2.12587 |
| C         | 0.09182  | 5.37417  | -0.35830 | C | 3.19565  | 0.94487  | -2.32966 |
| H         | 0.11651  | 5.28322  | -1.44788 | C | 2.45777  | -2.82412 | -2.08496 |
| H         | -0.89907 | 5.05898  | -0.01006 | H | 1.70943  | -2.92474 | -2.87847 |
| H         | 0.22354  | 6.42990  | -0.09158 | H | 1.93849  | -2.93427 | -1.12487 |
| C         | -1.72691 | -2.72411 | -0.07637 | H | 3.16355  | -3.65487 | -2.18377 |
| C         | -1.90576 | -2.98062 | 1.29661  | C | 6.78904  | -0.24956 | -1.76468 |
| C         | -2.83156 | -2.54022 | -0.93012 | H | 7.11630  | 0.61656  | -1.17897 |
| C         | -3.20849 | -2.98772 | 1.80357  | H | 7.30266  | -0.19676 | -2.73412 |
| C         | -4.11447 | -2.55434 | -0.37313 | H | 7.14081  | -1.15457 | -1.25861 |
| C         | -4.32470 | -2.76286 | 0.99200  | C | 2.46628  | 2.24932  | -2.53548 |
| H         | -3.35262 | -3.17814 | 2.86503  | H | 1.94280  | 2.27279  | -3.50058 |
| H         | -4.97029 | -2.39998 | -1.02728 | H | 3.16991  | 3.08777  | -2.52320 |
| C         | -2.66940 | -2.36519 | -2.42257 | H | 1.71674  | 2.40796  | -1.75299 |
| H         | -2.62254 | -3.33576 | -2.93661 | C | 1.60903  | -0.27359 | 0.71846  |
| H         | -3.51932 | -1.81848 | -2.84178 | H | 2.38483  | -0.63727 | 0.05142  |
| H         | -1.75730 | -1.81885 | -2.67705 | C | 2.05159  | -0.03137 | 2.07957  |
| C         | -0.73614 | -3.23875 | 2.21326  | C | 3.39399  | -0.22094 | 2.45471  |
| H         | -0.03215 | -3.96329 | 1.78679  | H | 4.09726  | -0.55159 | 1.69503  |
| H         | -0.18568 | -2.31014 | 2.39555  | C | 3.81398  | -0.00499 | 3.76354  |
| H         | -1.08249 | -3.63337 | 3.17374  | H | 4.85334  | -0.15449 | 4.04007  |
| C         | -5.71621 | -2.73012 | 1.57967  | C | 2.88021  | 0.39921  | 4.71986  |
| H         | -5.80408 | -3.40124 | 2.44097  | H | 3.19217  | 0.56776  | 5.74720  |
| H         | -5.97181 | -1.72046 | 1.92789  | C | 1.53754  | 0.59708  | 4.38256  |
| H         | -6.47190 | -3.02225 | 0.84250  | H | 0.84144  | 0.91799  | 5.14682  |
| <b>6b</b> |          |          |          | C | 1.12476  | 0.38874  | 3.06469  |
| Ru        | -0.12906 | 0.11926  | 0.22928  | C | -1.25463 | 0.73053  | 3.56591  |
| O         | -0.15742 | 0.54563  | 2.60844  | H | -1.00100 | 0.11650  | 4.43784  |
| O         | -1.91037 | 2.42639  | 0.60372  | C | -2.52457 | 0.19322  | 2.92273  |
| O         | 0.19029  | 2.19338  | -0.11729 | H | -2.80598 | 0.81019  | 2.06557  |
| N         | -1.09221 | -0.35104 | -2.50792 | H | -3.33439 | 0.22112  | 3.66150  |
|           |          |          |          | H | -2.38268 | -0.83530 | 2.58587  |

|   |          |          |          |              |          |          |          |
|---|----------|----------|----------|--------------|----------|----------|----------|
| C | -1.37701 | 2.20222  | 3.95209  | C            | -2.65643 | 2.12698  | -2.43941 |
| H | -0.44174 | 2.60733  | 4.35042  | H            | -1.57412 | 2.18031  | -2.31045 |
| H | -2.15129 | 2.31487  | 4.72012  | H            | -2.88223 | 2.31173  | -3.49960 |
| H | -1.67090 | 2.78124  | 3.07335  | H            | -3.10450 | 2.93614  | -1.85826 |
| C | -0.81507 | 2.91183  | 0.27269  | C            | -2.27272 | -2.92372 | -2.01000 |
| C | -0.56345 | 4.44163  | 0.30402  | H            | -1.92602 | -3.03159 | -3.04616 |
| C | -0.25139 | 4.93753  | -1.12442 | H            | -1.39378 | -2.95011 | -1.36247 |
| H | -1.08946 | 4.74710  | -1.80521 | H            | -2.89585 | -3.79363 | -1.78159 |
| H | 0.63741  | 4.44666  | -1.53011 |              |          |          |          |
| H | -0.07004 | 6.01971  | -1.11434 |              |          |          |          |
| C | -1.80504 | 5.17303  | 0.83864  | <b>6c-TS</b> |          |          |          |
| H | -2.68601 | 4.96382  | 0.22429  | Ru           | -0.00376 | 0.25701  | -0.76142 |
| H | -1.63119 | 6.25652  | 0.83788  | O            | 3.25967  | -2.07841 | 1.41355  |
| H | -2.04090 | 4.86747  | 1.86278  | O            | -1.77545 | 1.66332  | -1.52124 |
| C | 0.65034  | 4.72670  | 1.21420  | O            | -1.36726 | 1.18577  | 0.59011  |
| H | 0.85552  | 5.80435  | 1.24686  | N            | -0.42597 | -2.28130 | -2.10763 |
| H | 1.54262  | 4.21203  | 0.84732  | N            | -1.98654 | -2.13581 | -0.57706 |
| H | 0.46405  | 4.39033  | 2.24106  | C            | -0.94396 | -1.48135 | -1.14853 |
| O | -0.86179 | -1.75353 | 0.76765  | C            | -1.08419 | -3.58920 | -2.20752 |
| C | -0.10619 | -2.75500 | 1.11240  | H            | -0.38204 | -4.40028 | -1.97893 |
| O | 1.12822  | -2.78983 | 1.01128  | H            | -1.47682 | -3.76036 | -3.21513 |
| C | -0.83022 | -3.99062 | 1.71650  | C            | -2.20582 | -3.47583 | -1.15704 |
| C | -2.35718 | -3.83366 | 1.76649  | H            | -3.20508 | -3.54344 | -1.60101 |
| H | -2.81258 | -4.75506 | 2.15219  | H            | -2.13542 | -4.24296 | -0.37781 |
| H | -2.65550 | -3.01211 | 2.42457  | C            | 0.71570  | -1.87305 | -2.94775 |
| H | -2.77817 | -3.63060 | 0.77828  | C            | 0.40381  | -2.21975 | -4.42040 |
| C | -0.45326 | -5.22210 | 0.86509  | H            | -0.54061 | -1.76321 | -4.73695 |
| H | -0.87021 | -6.13435 | 1.30978  | H            | 0.34424  | -3.30165 | -4.59152 |
| H | -0.84705 | -5.13831 | -0.15516 | C            | 1.99855  | -2.61285 | -2.51398 |
| H | 0.63345  | -5.32693 | 0.80395  | H            | 2.29283  | -2.34009 | -1.49758 |
| C | -0.28103 | -4.18217 | 3.14760  | H            | 1.86528  | -3.70088 | -2.55994 |
| H | 0.80635  | -4.29501 | 3.13153  | C            | 0.88485  | -0.35055 | -2.80535 |
| H | -0.52523 | -3.32144 | 3.78274  | C            | 1.09703  | -0.69556 | 0.43127  |
| H | -0.72261 | -5.07512 | 3.60774  | H            | 1.22797  | -1.77672 | 0.31459  |
| C | -2.45744 | -0.38900 | -2.05976 | C            | 1.84813  | -0.18838 | 1.56949  |
| C | -3.05063 | -1.64566 | -1.81522 | C            | 2.96076  | -0.92732 | 2.07854  |
| C | -3.21563 | 0.79359  | -2.00706 | C            | -1.97189 | 1.89351  | -0.29508 |
| C | -4.39121 | -1.68397 | -1.43104 | O            | 1.08615  | 2.16048  | -0.50901 |
| C | -4.55552 | 0.70344  | -1.60836 | C            | 2.24802  | 2.18278  | -1.00410 |
| C | -5.15655 | -0.51767 | -1.30161 | O            | 2.73303  | 1.20988  | -1.67488 |
| H | -4.85336 | -2.64940 | -1.23550 | H            | 1.71715  | 0.35781  | -1.90614 |
| H | -5.14152 | 1.61777  | -1.54438 | C            | 3.13809  | 3.42356  | -0.81600 |
| C | -6.59338 | -0.58545 | -0.83934 | C            | 4.37119  | -2.90569 | 1.80780  |
| H | -7.10112 | -1.47259 | -1.23445 | H            | 4.40910  | -2.95006 | 2.90406  |
| H | -6.65253 | -0.63973 | 0.25576  | C            | -2.85884 | 3.06282  | 0.15352  |
| H | -7.15824 | 0.29846  | -1.15330 | C            | -4.13763 | 3.09637  | -0.70416 |
|   |          |          |          | H            | -4.72868 | 3.98917  | -0.46544 |

|   |          |          |          |           |          |          |          |
|---|----------|----------|----------|-----------|----------|----------|----------|
| H | -3.89013 | 3.11461  | -1.76893 | C         | -1.55489 | -2.49398 | 2.27441  |
| H | -4.76324 | 2.21713  | -0.51221 | H         | -0.69358 | -1.82324 | 2.18160  |
| C | -2.03737 | 4.35066  | -0.09561 | H         | -1.68191 | -2.73540 | 3.33425  |
| H | -1.09537 | 4.32812  | 0.46303  | H         | -1.30015 | -3.41999 | 1.74578  |
| H | -1.79841 | 4.45815  | -1.15829 | C         | -4.28786 | -0.74506 | -1.64565 |
| H | -2.61041 | 5.22961  | 0.22508  | H         | -3.54099 | -0.02404 | -1.99641 |
| C | -3.21435 | 2.94854  | 1.64479  | H         | -4.17600 | -1.65533 | -2.24732 |
| H | -3.84926 | 3.79247  | 1.94292  | H         | -5.28073 | -0.33417 | -1.85288 |
| H | -3.75458 | 2.01902  | 1.85180  | C         | -6.06212 | -0.36097 | 3.07083  |
| H | -2.31538 | 2.95555  | 2.26756  | H         | -6.09961 | -0.99177 | 3.96558  |
| C | 3.43812  | 4.00672  | -2.21470 | H         | -5.88013 | 0.66875  | 3.40629  |
| H | 3.92213  | 3.26084  | -2.85177 | H         | -7.05121 | -0.37907 | 2.60050  |
| H | 2.51754  | 4.33705  | -2.71101 | H         | 0.04979  | 0.18126  | -3.28057 |
| H | 4.10261  | 4.87478  | -2.12527 | H         | 2.82309  | -2.35353 | -3.18761 |
| C | 2.43793  | 4.47581  | 0.05670  | H         | 1.20020  | -1.83120 | -5.06301 |
| H | 2.20918  | 4.07531  | 1.04908  | H         | 1.75215  | -0.09171 | -3.43130 |
| H | 3.08806  | 5.35097  | 0.17889  |           |          |          |          |
| H | 1.49694  | 4.80460  | -0.39439 | <b>6c</b> |          |          |          |
| C | 4.45685  | 2.97494  | -0.14914 | Ru        | 0.49872  | 0.25315  | -0.24208 |
| H | 5.12711  | 3.83519  | -0.03036 | O         | 1.82404  | 1.08912  | 1.64497  |
| H | 4.27096  | 2.54971  | 0.84403  | O         | 3.48960  | -0.72939 | -0.57288 |
| H | 4.96304  | 2.21913  | -0.75622 | O         | 1.47482  | -1.62821 | -0.13523 |
| C | 4.05907  | -4.29854 | 1.27021  | N         | -0.34226 | -0.39708 | -3.02226 |
| H | 3.11651  | -4.67013 | 1.68428  | N         | -1.78116 | -1.29022 | -1.61442 |
| H | 3.97289  | -4.27578 | 0.17836  | C         | -0.66613 | -0.50499 | -1.69250 |
| H | 4.85816  | -4.99743 | 1.53997  | C         | -1.34562 | -1.03304 | -3.89739 |
| C | 5.67908  | -2.34116 | 1.25218  | H         | -0.86881 | -1.67897 | -4.63726 |
| H | 5.64295  | -2.32109 | 0.15763  | H         | -1.92673 | -0.27227 | -4.43473 |
| H | 5.85956  | -1.32142 | 1.60426  | C         | -2.20339 | -1.82485 | -2.91800 |
| H | 6.52500  | -2.96617 | 1.56046  | H         | -3.27737 | -1.67585 | -3.06494 |
| C | 1.49062  | 1.00882  | 2.22723  | H         | -2.00282 | -2.90248 | -2.96442 |
| C | 3.67435  | -0.45328 | 3.18510  | C         | 0.60234  | 0.56634  | -3.66756 |
| H | 0.62819  | 1.54848  | 1.85622  | C         | -0.13860 | 1.88634  | -3.96789 |
| H | 4.53259  | -0.99292 | 3.56685  | H         | -0.48554 | 2.33662  | -3.03444 |
| C | 2.19208  | 1.46521  | 3.33901  | H         | -0.99648 | 1.73305  | -4.63263 |
| C | 3.28562  | 0.73496  | 3.80814  | C         | 1.12404  | -0.05946 | -4.97870 |
| H | 3.84839  | 1.08584  | 4.66959  | H         | 1.59385  | -1.03134 | -4.79014 |
| H | 1.88822  | 2.38066  | 3.83807  | H         | 0.33924  | -0.18761 | -5.73093 |
| C | -2.96294 | -1.62458 | 0.34395  | C         | 1.81324  | 0.84669  | -2.77398 |
| C | -4.12122 | -1.00938 | -0.16677 | H         | 2.30833  | -0.06168 | -2.42525 |
| C | -2.80066 | -1.84526 | 1.72165  | C         | -2.55311 | -1.74178 | -0.48755 |
| C | -5.11605 | -0.61959 | 0.73602  | C         | -3.70812 | -1.01811 | -0.13169 |
| C | -3.82112 | -1.43345 | 2.58493  | C         | -4.50095 | -1.50879 | 0.91218  |
| C | -4.98506 | -0.81900 | 2.11459  | H         | -5.38632 | -0.94695 | 1.20218  |
| H | -6.01916 | -0.15151 | 0.34942  | C         | -4.18641 | -2.69014 | 1.59027  |
| H | -3.70215 | -1.60153 | 3.65339  | C         | -3.04546 | -3.39487 | 1.19300  |



|   |          |          |          |   |          |          |          |
|---|----------|----------|----------|---|----------|----------|----------|
| H | -2.66036 | 5.71799  | -0.08770 | H | -1.93778 | -4.11702 | -2.26943 |
| H | -3.67527 | 5.35426  | -1.48638 | H | -2.92310 | -4.30336 | -3.73517 |
| C | -3.23736 | 3.61734  | -0.25012 | H | -1.39717 | -3.39479 | -3.78924 |
| H | -4.13715 | 3.74128  | 0.36774  | C | -4.28963 | -2.66883 | -1.97692 |
| C | -2.08973 | 3.08697  | 0.63352  | H | -4.95345 | -3.34902 | -2.52443 |
| H | -2.36876 | 2.12565  | 1.08024  | H | -3.99313 | -3.16120 | -1.04382 |
| H | -1.89906 | 3.78816  | 1.45901  | H | -4.84956 | -1.76402 | -1.72426 |
| C | -3.50773 | 2.59725  | -1.36961 | C | -3.86213 | 1.07318  | 4.39564  |
| H | -3.83729 | 1.64382  | -0.94838 | H | -2.88966 | 1.04797  | 4.89710  |
| H | -4.31802 | 2.95884  | -2.01881 | H | -3.85681 | 1.89457  | 3.67086  |
| C | -2.22805 | 2.40134  | -2.21148 | H | -4.63582 | 1.27624  | 5.14390  |
| H | -2.42689 | 1.68220  | -3.00975 | C | -5.48629 | -0.26266 | 2.96951  |
| C | -1.02526 | 1.86837  | -1.34184 | H | -5.52694 | 0.55716  | 2.24417  |
| C | -1.84638 | 3.75591  | -2.84642 | H | -5.64661 | -1.20094 | 2.43058  |
| H | -0.95497 | 3.64232  | -3.47818 | H | -6.30565 | -0.13344 | 3.68585  |
| H | -2.66135 | 4.09816  | -3.50030 | C | -1.25791 | -2.94828 | 0.82762  |
| C | -0.97058 | -0.46211 | 0.96632  | C | -3.35444 | -2.84795 | 2.67424  |
| H | -1.12280 | 0.32498  | 1.71305  | H | -0.42935 | -2.96931 | 0.13057  |
| C | -1.65028 | -1.69253 | 1.34043  | H | -4.17777 | -2.83567 | 3.37832  |
| C | -2.72071 | -1.66110 | 2.28746  | C | -1.88087 | -4.12656 | 1.22721  |
| C | 2.04964  | -1.44699 | -1.60623 | C | -2.93027 | -4.06953 | 2.14641  |
| O | -0.96475 | -1.60773 | -1.83463 | H | -3.43065 | -4.98146 | 2.46245  |
| C | -2.17157 | -1.34394 | -2.06539 | H | -1.54878 | -5.08181 | 0.83137  |
| O | -2.72024 | -0.24951 | -1.68255 | C | 3.20924  | 0.47860  | 1.30537  |
| H | -1.79452 | 0.55732  | -1.28196 | C | 4.29645  | 0.86611  | 0.48674  |
| C | -3.05631 | -2.33073 | -2.84302 | C | 3.29012  | -0.63946 | 2.16086  |
| C | -4.13997 | -0.25231 | 3.69426  | C | 5.45688  | 0.08250  | 0.51940  |
| H | -4.09890 | -1.06082 | 4.43554  | C | 4.47691  | -1.38311 | 2.16239  |
| C | 2.93729  | -2.53328 | -2.23171 | C | 5.54964  | -1.03288 | 1.34759  |
| C | 4.19754  | -1.88838 | -2.83854 | H | 6.30337  | 0.35799  | -0.10393 |
| H | 4.79393  | -2.64877 | -3.35785 | H | 4.56130  | -2.24970 | 2.81178  |
| H | 3.92855  | -1.10825 | -3.55588 | C | 2.15242  | -1.03279 | 3.09494  |
| H | 4.82434  | -1.43841 | -2.06073 | H | 1.27051  | -0.45647 | 2.80027  |
| C | 2.10025  | -3.18377 | -3.35895 | C | 4.27446  | 2.12424  | -0.38013 |
| H | 1.17230  | -3.60956 | -2.96209 | H | 3.29276  | 2.59427  | -0.27094 |
| H | 1.83547  | -2.44377 | -4.12044 | H | -0.15973 | 1.90629  | -2.01906 |
| H | 2.67477  | -3.98747 | -3.83617 | C | 4.44888  | 1.81413  | -1.87889 |
| C | 3.33112  | -3.59672 | -1.19380 | H | 4.40604  | 2.74410  | -2.45973 |
| H | 3.96144  | -4.36127 | -1.66555 | H | 5.41939  | 1.34500  | -2.08148 |
| H | 3.89081  | -3.15441 | -0.36356 | H | 3.66005  | 1.14542  | -2.23377 |
| H | 2.44812  | -4.08945 | -0.77643 | C | 5.33250  | 3.14332  | 0.09338  |
| C | -3.51359 | -1.63167 | -4.14295 | H | 5.21508  | 3.39311  | 1.15474  |
| H | -4.06476 | -0.71344 | -3.91981 | H | 6.34867  | 2.75431  | -0.04067 |
| H | -2.65668 | -1.37363 | -4.77692 | H | 5.25435  | 4.07135  | -0.48571 |
| H | -4.16749 | -2.29913 | -4.71711 | C | 1.78533  | -2.52250 | 2.96926  |
| C | -2.27858 | -3.61217 | -3.17856 | H | 1.58714  | -2.78167 | 1.92652  |

|           |          |          |          |   |          |          |          |
|-----------|----------|----------|----------|---|----------|----------|----------|
| H         | 2.58813  | -3.17065 | 3.34179  | C | 2.10928  | -1.71077 | -1.79978 |
| H         | 0.88742  | -2.74088 | 3.55896  | C | 2.43030  | -2.97338 | -1.24225 |
| C         | 2.48916  | -0.67311 | 4.55711  | C | 3.78296  | -3.31280 | -1.11449 |
| H         | 3.36545  | -1.23151 | 4.90852  | H | 4.05108  | -4.27187 | -0.68166 |
| H         | 2.71075  | 0.39442  | 4.67390  | C | 4.78872  | -2.45078 | -1.54016 |
| H         | 1.64842  | -0.91971 | 5.21706  | C | 4.45323  | -1.22803 | -2.11222 |
| H         | 6.46128  | -1.62481 | 1.36333  | H | 5.24264  | -0.56679 | -2.45718 |
| <b>6d</b> |          |          |          | C | 3.11700  | -0.83283 | -2.25961 |
| Ru        | -0.01127 | 0.39946  | 0.34233  | C | 1.37285  | -3.99125 | -0.82022 |
| O         | 0.49300  | 1.89939  | 2.25367  | H | 0.40204  | -3.48661 | -0.81690 |
| O         | -1.32203 | 3.21889  | -0.12059 | C | 2.80891  | 0.50642  | -2.91981 |
| O         | 0.33937  | 1.99523  | -1.02081 | H | 1.74554  | 0.71801  | -2.78118 |
| N         | -1.42362 | -0.88613 | -1.93226 | C | 1.74927  | 0.00265  | 0.77730  |
| N         | 0.72093  | -1.40207 | -2.03466 | H | 2.32461  | -0.80094 | 0.32857  |
| C         | -0.22274 | -0.76651 | -1.26954 | C | 2.48906  | 0.78505  | 1.74789  |
| C         | -1.30870 | -1.74386 | -3.12845 | C | 3.86239  | 0.56545  | 1.96089  |
| H         | -1.81773 | -1.30093 | -3.98512 | H | 4.35810  | -0.19904 | 1.36836  |
| H         | -1.74860 | -2.73280 | -2.93913 | C | 4.57047  | 1.29569  | 2.90980  |
| C         | 0.19327  | -1.81666 | -3.34336 | H | 5.63108  | 1.11963  | 3.06185  |
| H         | 0.54584  | -2.81623 | -3.60630 | C | 3.89497  | 2.24905  | 3.67422  |
| H         | 0.53242  | -1.11831 | -4.11937 | H | 4.43057  | 2.82143  | 4.42705  |
| C         | -2.79708 | -0.68369 | -1.37829 | C | 2.52920  | 2.48819  | 3.49347  |
| C         | -3.24313 | -1.92826 | -0.56861 | H | 2.04005  | 3.23515  | 4.10483  |
| H         | -2.54572 | -2.06663 | 0.26396  | C | 1.82764  | 1.76597  | 2.52427  |
| H         | -3.19623 | -2.82691 | -1.19900 | C | -0.33379 | 2.74599  | 3.11955  |
| C         | -4.68402 | -1.73497 | -0.04376 | H | 0.01792  | 2.56561  | 4.14257  |
| H         | -4.97925 | -2.62815 | 0.52251  | C | -1.76820 | 2.25816  | 2.98643  |
| C         | -5.64828 | -1.52772 | -1.23007 | H | -2.12854 | 2.45513  | 1.97422  |
| H         | -5.63842 | -2.40852 | -1.88782 | H | -2.39930 | 2.79897  | 3.70131  |
| H         | -6.67792 | -1.41432 | -0.86466 | H | -1.83405 | 1.18833  | 3.19579  |
| C         | -5.22757 | -0.27139 | -2.01999 | C | -0.18496 | 4.21800  | 2.74074  |
| H         | -5.89979 | -0.13159 | -2.87674 | H | 0.85661  | 4.55095  | 2.77069  |
| C         | -3.79214 | -0.46553 | -2.55111 | H | -0.75772 | 4.83270  | 3.44541  |
| H         | -3.47854 | 0.40721  | -3.14015 | H | -0.57951 | 4.37285  | 1.73367  |
| H         | -3.79341 | -1.33156 | -3.22267 | C | -0.39576 | 3.06105  | -0.93154 |
| C         | -5.28072 | 0.96419  | -1.10493 | C | -0.03708 | 4.19510  | -1.93023 |
| H         | -5.00415 | 1.86658  | -1.66661 | C | 0.16134  | 3.61791  | -3.34474 |
| H         | -6.30265 | 1.11734  | -0.73211 | H | -0.75670 | 3.13749  | -3.70622 |
| C         | -4.31057 | 0.75082  | 0.07092  | H | 0.95887  | 2.87207  | -3.35974 |
| H         | -4.31184 | 1.63384  | 0.72076  | H | 0.41842  | 4.41834  | -4.05034 |
| C         | -2.87662 | 0.55670  | -0.47282 | C | -1.16358 | 5.24148  | -1.95551 |
| H         | -2.55368 | 1.45115  | -1.00728 | H | -2.10941 | 4.79739  | -2.28475 |
| C         | -4.73170 | -0.49630 | 0.87327  | H | -0.90783 | 6.05445  | -2.64709 |
| H         | -4.05934 | -0.63682 | 1.72868  | H | -1.33131 | 5.66765  | -0.96304 |
| H         | -5.74546 | -0.36241 | 1.27510  | C | 1.27127  | 4.85726  | -1.44461 |
|           |          |          |          | H | 1.57048  | 5.66101  | -2.12961 |



|   |          |          |          |           |          |          |          |
|---|----------|----------|----------|-----------|----------|----------|----------|
| H | 5.58989  | -1.96561 | 4.07850  | C         | -5.56113 | 2.88915  | -0.30773 |
| C | 0.30247  | 2.08754  | 2.16834  | H         | -3.93561 | 2.06840  | 0.86180  |
| C | 2.29677  | 1.76982  | 4.10241  | C         | -6.10091 | 3.03178  | -1.58975 |
| H | -0.48260 | 2.18081  | 1.42799  | H         | -5.85841 | 2.59079  | -3.68798 |
| H | 3.06452  | 1.67498  | 4.86083  | H         | -6.07081 | 3.32442  | 0.54833  |
| C | 0.50035  | 3.07919  | 3.12278  | H         | -7.03170 | 3.57579  | -1.73034 |
| C | 1.50060  | 2.91711  | 4.08270  |           |          |          |          |
| H | 1.66840  | 3.68623  | 4.83256  | <b>8a</b> |          |          |          |
| H | -0.12156 | 3.96939  | 3.12243  | Ru        | 0.07509  | -0.00935 | 0.26910  |
| C | -2.80768 | -2.10274 | 0.82096  | O         | 0.44276  | -0.16987 | 2.69203  |
| C | -3.87941 | -2.06738 | -0.09251 | O         | 0.99530  | 2.86746  | 1.30917  |
| C | -2.97475 | -1.70327 | 2.15568  | O         | 1.84571  | 1.13768  | 0.13424  |
| C | -5.11775 | -1.60404 | 0.35704  | N         | -1.17767 | 0.69712  | -2.34672 |
| C | -4.23479 | -1.24507 | 2.55847  | N         | 0.26673  | -0.93668 | -2.65566 |
| C | -5.31510 | -1.18056 | 1.67597  | C         | -0.24579 | -0.08448 | -1.71169 |
| H | -5.94754 | -1.56259 | -0.34552 | C         | -1.50548 | 0.15512  | -3.67984 |
| H | -4.36991 | -0.92650 | 3.59011  | H         | -1.68235 | 0.94332  | -4.41099 |
| C | -1.82986 | -1.73236 | 3.13918  | H         | -2.40467 | -0.47247 | -3.61898 |
| H | -1.08050 | -0.97414 | 2.88754  | C         | -0.26982 | -0.66583 | -3.99974 |
| H | -2.18672 | -1.52943 | 4.15380  | H         | -0.49342 | -1.59669 | -4.52623 |
| H | -1.31730 | -2.70149 | 3.15263  | H         | 0.46416  | -0.10200 | -4.59227 |
| C | -3.70176 | -2.48379 | -1.53481 | C         | -2.02340 | 1.79662  | -1.80771 |
| H | -3.03629 | -1.78958 | -2.06009 | C         | -3.48696 | 1.32822  | -1.60903 |
| H | -3.27100 | -3.48837 | -1.62747 | H         | -3.49733 | 0.48836  | -0.90635 |
| H | -4.66556 | -2.48780 | -2.05315 | H         | -3.90236 | 0.96891  | -2.56032 |
| C | -6.65745 | -0.64520 | 2.11682  | C         | -4.35022 | 2.49897  | -1.08598 |
| H | -7.47709 | -1.30041 | 1.79859  | H         | -5.38082 | 2.14565  | -0.95143 |
| H | -6.71113 | -0.54059 | 3.20534  | C         | -4.32638 | 3.65637  | -2.10582 |
| H | -6.84537 | 0.34275  | 1.67650  | H         | -4.73956 | 3.32261  | -3.06822 |
| H | 0.66554  | -1.02372 | -2.62768 | H         | -4.96131 | 4.48121  | -1.75514 |
| C | 2.21132  | 3.63158  | -1.13619 | C         | -2.87638 | 4.15036  | -2.29221 |
| C | 1.32279  | 4.71239  | -1.05301 | H         | -2.85368 | 4.96177  | -3.03148 |
| C | 3.57666  | 3.86889  | -1.34501 | C         | -2.00578 | 2.98608  | -2.81074 |
| C | 1.79673  | 6.01712  | -1.17676 | H         | -0.96898 | 3.31528  | -2.96040 |
| H | 0.26891  | 4.51064  | -0.89401 | H         | -2.39426 | 2.67694  | -3.78788 |
| C | 4.04798  | 5.17510  | -1.46759 | C         | -2.31969 | 4.64924  | -0.94728 |
| H | 4.25265  | 3.02307  | -1.40867 | H         | -1.29436 | 5.02183  | -1.07244 |
| C | 3.15928  | 6.25035  | -1.38363 | H         | -2.92324 | 5.48765  | -0.57332 |
| H | 1.10482  | 6.85276  | -1.11292 | C         | -2.34113 | 3.48754  | 0.06130  |
| H | 5.10743  | 5.35567  | -1.62943 | H         | -1.91401 | 3.81517  | 1.01548  |
| H | 3.52780  | 7.26856  | -1.47996 | C         | -1.47632 | 2.32295  | -0.47137 |
| C | -3.70312 | 1.63650  | -1.22781 | H         | -0.44158 | 2.65503  | -0.57742 |
| C | -4.24613 | 1.78285  | -2.51076 | C         | -3.78913 | 2.99762  | 0.26096  |
| C | -4.36630 | 2.19372  | -0.12579 | H         | -3.81506 | 2.19021  | 1.00486  |
| C | -5.44165 | 2.47783  | -2.69042 | H         | -4.41400 | 3.81291  | 0.65075  |
| H | -3.71536 | 1.34921  | -3.35198 | C         | 1.44476  | -1.76260 | -2.62038 |



|   |          |          |          |               |          |          |          |
|---|----------|----------|----------|---------------|----------|----------|----------|
| C | 1.28404  | -3.16251 | -2.62626 | C             | 3.32725  | 2.85811  | 0.80755  |
| C | 2.43286  | -3.96026 | -2.67695 | C             | 4.45196  | 2.12386  | 0.40762  |
| H | 2.31702  | -5.04212 | -2.67349 | C             | 3.49429  | 4.16849  | 1.27514  |
| C | 3.71648  | -3.40850 | -2.73575 | C             | 5.72374  | 2.69391  | 0.47251  |
| C | 3.83447  | -2.01581 | -2.76992 | H             | 4.31619  | 1.10706  | 0.05580  |
| H | 4.82286  | -1.56713 | -2.84677 | C             | 4.76421  | 4.74096  | 1.33202  |
| C | 2.71902  | -1.17186 | -2.72618 | H             | 2.61361  | 4.71916  | 1.58916  |
| C | -0.08207 | -3.80344 | -2.54815 | C             | 5.88225  | 4.00416  | 0.93124  |
| H | -0.71803 | -3.51954 | -3.39635 | H             | 6.59241  | 2.11604  | 0.16661  |
| H | -0.60975 | -3.51474 | -1.63203 | H             | 4.88432  | 5.76016  | 1.69087  |
| H | 0.00879  | -4.89408 | -2.56002 | H             | 6.87338  | 4.44860  | 0.97887  |
| C | 4.94324  | -4.29099 | -2.75680 | C             | -3.56491 | -2.32950 | 1.05506  |
| H | 5.36279  | -4.41167 | -1.74906 | C             | -4.00466 | -3.66007 | 1.03241  |
| H | 5.73309  | -3.86494 | -3.38533 | C             | -4.46101 | -1.31982 | 1.43136  |
| H | 4.71079  | -5.29197 | -3.13525 | C             | -5.31933 | -3.97547 | 1.37201  |
| C | 2.90015  | 0.32510  | -2.80112 | H             | -3.29584 | -4.43041 | 0.74774  |
| H | 2.29756  | 0.76885  | -3.60338 | C             | -5.77578 | -1.63562 | 1.77563  |
| H | 3.94719  | 0.57251  | -3.00216 | H             | -4.11674 | -0.29166 | 1.45508  |
| H | 2.60646  | 0.80571  | -1.86231 | C             | -6.20852 | -2.96357 | 1.74466  |
| C | 0.92904  | -1.64253 | 0.47160  | H             | -5.65138 | -5.01034 | 1.34889  |
| H | 1.13309  | -2.33290 | -0.34003 | H             | -6.46286 | -0.84589 | 2.06922  |
| C | 1.41958  | -2.08176 | 1.76020  | H             | -7.23333 | -3.20904 | 2.01186  |
| C | 2.14162  | -3.28290 | 1.89372  |               |          |          |          |
| H | 2.32449  | -3.87361 | 1.00005  |               |          |          |          |
| C | 2.60183  | -3.71208 | 3.13360  | <b>12a-ts</b> |          |          |          |
| H | 3.15899  | -4.63957 | 3.22426  | Ru            | -0.26327 | -0.07900 | 0.64712  |
| C | 2.33111  | -2.93714 | 4.26398  | O             | 0.71012  | 2.95388  | -1.71857 |
| H | 2.68117  | -3.26075 | 5.24064  | O             | -0.39407 | -1.96593 | 2.12904  |
| C | 1.61445  | -1.74048 | 4.16945  | O             | -2.12985 | -0.82063 | 1.40493  |
| H | 1.42972  | -1.16245 | 5.06556  | N             | 0.41722  | -1.93471 | -1.76880 |
| C | 1.16223  | -1.31042 | 2.91950  | N             | -1.56804 | -1.01739 | -2.00819 |
| C | -0.05874 | 0.60790  | 3.82982  | C             | -0.48179 | -1.08656 | -1.17798 |
| H | -0.35110 | -0.12317 | 4.59226  | C             | 0.00512  | -2.29190 | -3.14594 |
| C | -1.29469 | 1.35259  | 3.34981  | H             | 0.15537  | -3.35198 | -3.34810 |
| H | -1.00782 | 2.09979  | 2.60529  | H             | 0.58983  | -1.71448 | -3.87539 |
| H | -1.76045 | 1.86360  | 4.20028  | C             | -1.46434 | -1.91404 | -3.16782 |
| H | -2.01688 | 0.65811  | 2.91240  | H             | -1.76899 | -1.40269 | -4.08536 |
| C | 1.02596  | 1.54622  | 4.35285  | H             | -2.11854 | -2.78478 | -3.02919 |
| H | 1.93296  | 1.00736  | 4.64292  | C             | 1.85059  | -2.18416 | -1.40421 |
| H | 0.65094  | 2.07888  | 5.23484  | C             | 2.73331  | -0.97701 | -1.80885 |
| H | 1.28003  | 2.27694  | 3.58072  | H             | 2.39217  | -0.08393 | -1.27878 |
| C | 1.93803  | 2.26739  | 0.76513  | H             | 2.62613  | -0.79163 | -2.88814 |
| H | -1.52151 | 1.53834  | 0.29751  | C             | 4.21347  | -1.26672 | -1.47096 |
| O | -1.83388 | -0.76490 | 0.63291  | H             | 4.81960  | -0.39569 | -1.75399 |
| C | -2.13207 | -2.03212 | 0.68064  | C             | 4.69610  | -2.51008 | -2.24263 |
| O | -1.35347 | -2.96674 | 0.45322  | H             | 4.61952  | -2.34185 | -3.32644 |
|   |          |          |          | H             | 5.75479  | -2.70516 | -2.02364 |

|   |          |          |          |            |          |          |          |
|---|----------|----------|----------|------------|----------|----------|----------|
| C | 3.84031  | -3.72558 | -1.83247 | C          | 0.37016  | 3.61777  | -0.56833 |
| H | 4.15792  | -4.61065 | -2.39969 | C          | 1.68026  | 3.50792  | -2.62561 |
| C | 2.36179  | -3.43803 | -2.17030 | H          | 1.44313  | 4.56695  | -2.79680 |
| H | 1.73942  | -4.30619 | -1.91321 | C          | 1.50108  | 2.75225  | -3.93842 |
| H | 2.28886  | -3.28891 | -3.25360 | H          | 1.67903  | 1.68200  | -3.78701 |
| C | 3.99126  | -3.98657 | -0.32356 | H          | 2.21119  | 3.12015  | -4.68698 |
| H | 3.41050  | -4.87238 | -0.03142 | H          | 0.48678  | 2.88390  | -4.32756 |
| H | 5.04177  | -4.19544 | -0.07865 | C          | 3.09589  | 3.36881  | -2.06403 |
| C | 3.49579  | -2.74667 | 0.44060  | H          | 3.20237  | 3.88258  | -1.10481 |
| H | 3.57590  | -2.91766 | 1.52156  | H          | 3.82480  | 3.79386  | -2.76388 |
| C | 2.01255  | -2.48077 | 0.10064  | H          | 3.33345  | 2.31148  | -1.90786 |
| H | 1.39020  | -3.34047 | 0.37473  | C          | -1.61731 | -1.68078 | 2.21252  |
| C | 4.34625  | -1.52143 | 0.04425  | C          | -2.48626 | -2.32191 | 3.30618  |
| H | 4.00511  | -0.63831 | 0.59392  | H          | 1.67061  | -1.63866 | 0.70091  |
| H | 5.39956  | -1.69429 | 0.30612  | O          | 1.76969  | 0.71639  | 0.83778  |
| C | -2.87721 | -0.46326 | -1.77921 | C          | 1.54758  | 1.05865  | 2.05584  |
| C | -3.21289 | 0.75781  | -2.39865 | O          | 0.38790  | 0.86828  | 2.52980  |
| C | -4.50686 | 1.25849  | -2.22574 | C          | 2.66644  | 1.63815  | 2.92599  |
| H | -4.76523 | 2.21055  | -2.68459 | C          | -3.91696 | -1.76194 | 3.29528  |
| C | -5.47525 | 0.56740  | -1.49039 | H          | -4.50813 | -2.23297 | 4.09067  |
| C | -5.13148 | -0.67710 | -0.95802 | H          | -3.91815 | -0.68008 | 3.46015  |
| H | -5.88228 | -1.25038 | -0.41778 | H          | -4.41820 | -1.94759 | 2.34079  |
| C | -3.85055 | -1.22093 | -1.10345 | C          | -2.49959 | -3.84966 | 3.08305  |
| C | -2.22618 | 1.50381  | -3.26792 | H          | -1.47972 | -4.24513 | 3.06262  |
| H | -2.02931 | 0.95966  | -4.20207 | H          | -3.04963 | -4.34493 | 3.89266  |
| H | -1.26282 | 1.65622  | -2.77433 | H          | -2.98717 | -4.11223 | 2.13655  |
| H | -2.62528 | 2.48520  | -3.54303 | C          | -1.81537 | -2.01252 | 4.66350  |
| C | -6.85234 | 1.15110  | -1.27657 | H          | -1.76902 | -0.93209 | 4.84198  |
| H | -6.89619 | 1.72489  | -0.34133 | H          | -2.38913 | -2.46978 | 5.47922  |
| H | -7.61521 | 0.36761  | -1.21149 | H          | -0.79456 | -2.40297 | 4.68821  |
| H | -7.13110 | 1.83103  | -2.08878 | C          | 3.64996  | 2.44410  | 2.05856  |
| C | -3.58157 | -2.62489 | -0.61737 | H          | 4.46055  | 2.83875  | 2.68333  |
| H | -3.82955 | -3.35667 | -1.39962 | H          | 4.08932  | 1.82511  | 1.27160  |
| H | -4.20578 | -2.85982 | 0.24868  | H          | 3.14548  | 3.29089  | 1.57994  |
| H | -2.54009 | -2.77254 | -0.33069 | C          | 3.39607  | 0.44738  | 3.59351  |
| C | -0.91410 | 1.52497  | 0.00825  | H          | 4.18913  | 0.82017  | 4.25319  |
| H | -1.84574 | 1.50182  | -0.56610 | H          | 2.70166  | -0.14881 | 4.19530  |
| C | -0.45268 | 2.89852  | 0.32841  | H          | 3.85597  | -0.21012 | 2.84854  |
| C | -0.87572 | 3.52838  | 1.50567  | C          | 2.05900  | 2.53981  | 4.01658  |
| H | -1.49577 | 2.96720  | 2.19749  | H          | 2.85649  | 2.92927  | 4.66116  |
| C | -0.50131 | 4.84119  | 1.80193  | H          | 1.52784  | 3.38998  | 3.57599  |
| H | -0.84364 | 5.30889  | 2.72061  | H          | 1.34959  | 1.98491  | 4.63610  |
| C | 0.31539  | 5.53673  | 0.91359  |            |          |          |          |
| H | 0.62026  | 6.55723  | 1.13004  | <b>13a</b> |          |          |          |
| C | 0.75391  | 4.93034  | -0.26696 | Ru         | -0.08251 | -0.04293 | -0.60947 |
| H | 1.38921  | 5.48960  | -0.94368 | O          | 1.89875  | 1.41987  | 3.32059  |

|   |          |          |          |   |          |          |          |
|---|----------|----------|----------|---|----------|----------|----------|
| O | -1.68040 | -0.52716 | -2.32314 | C | -3.55737 | 1.02610  | -2.45530 |
| O | -1.96223 | 0.84448  | -0.62267 | C | -4.40302 | -0.06720 | -3.13432 |
| N | 0.51360  | -2.76863 | 0.45800  | H | -5.21219 | 0.39203  | -3.71528 |
| N | -1.50103 | -2.22879 | 1.13137  | H | -3.78909 | -0.67164 | -3.80748 |
| C | -0.44517 | -1.80412 | 0.39481  | H | -4.85770 | -0.73390 | -2.39306 |
| C | 0.11023  | -3.93529 | 1.26471  | C | -2.98535 | 1.97637  | -3.53487 |
| H | 0.84178  | -4.14021 | 2.05338  | H | -2.33625 | 2.73453  | -3.08588 |
| H | 0.02988  | -4.82964 | 0.63811  | H | -2.39517 | 1.41971  | -4.26929 |
| C | -1.25232 | -3.50663 | 1.82373  | H | -3.80629 | 2.48369  | -4.05666 |
| H | -2.04621 | -4.22687 | 1.60304  | C | -4.41131 | 1.82637  | -1.45777 |
| H | -1.23509 | -3.35018 | 2.90926  | H | -5.26084 | 2.28377  | -1.98027 |
| C | 1.83475  | -2.74175 | -0.20491 | H | -4.80138 | 1.18249  | -0.66303 |
| C | 2.11376  | -4.11172 | -0.88085 | H | -3.82796 | 2.62214  | -0.98620 |
| H | 1.31171  | -4.33288 | -1.59825 | C | 2.87363  | 2.75779  | -3.99432 |
| H | 2.11023  | -4.91217 | -0.13029 | H | 3.77914  | 2.31911  | -3.56511 |
| C | 3.48552  | -4.09822 | -1.58715 | H | 2.39855  | 2.00529  | -4.63656 |
| H | 3.65146  | -5.08006 | -2.04944 | H | 3.16038  | 3.60654  | -4.62857 |
| C | 4.58919  | -3.81918 | -0.54592 | C | 0.63164  | 3.79360  | -3.48823 |
| H | 4.59954  | -4.61328 | 0.21442  | H | -0.06191 | 4.12999  | -2.71067 |
| H | 5.57404  | -3.82916 | -1.03159 | H | 0.87160  | 4.65372  | -4.12739 |
| C | 4.33898  | -2.44765 | 0.11326  | H | 0.11045  | 3.04787  | -4.09567 |
| H | 5.11899  | -2.24821 | 0.85974  | C | 2.61488  | 4.28848  | -2.01283 |
| C | 2.96509  | -2.45723 | 0.81950  | H | 2.88458  | 5.15861  | -2.62542 |
| H | 2.78286  | -1.49102 | 1.30403  | H | 1.95824  | 4.63428  | -1.20501 |
| H | 2.95288  | -3.22364 | 1.60693  | H | 3.52308  | 3.88123  | -1.55971 |
| C | 4.35108  | -1.34608 | -0.96554 | C | 2.97573  | 0.34095  | 5.12298  |
| H | 4.18382  | -0.35674 | -0.52695 | H | 2.02399  | -0.10886 | 5.42254  |
| H | 5.33036  | -1.31999 | -1.46275 | H | 3.48137  | -0.34427 | 4.43379  |
| C | 3.25054  | -1.63375 | -2.00318 | H | 3.60141  | 0.46039  | 6.01388  |
| H | 3.23219  | -0.83277 | -2.74736 | C | 4.04598  | 2.35864  | 4.00732  |
| C | 1.86718  | -1.66387 | -1.30517 | H | 4.59277  | 1.69605  | 3.32778  |
| C | 3.49925  | -3.00040 | -2.66849 | H | 3.85656  | 3.30006  | 3.48374  |
| H | 2.73029  | -3.20390 | -3.42652 | H | 4.68238  | 2.56962  | 4.87421  |
| H | 4.46713  | -2.99310 | -3.18749 | C | -0.25934 | 3.02520  | 0.84446  |
| C | 0.66659  | 0.70288  | 0.95445  | C | 1.08637  | 3.71110  | 3.19936  |
| H | 1.32903  | 0.08698  | 1.57146  | H | -0.77069 | 2.74184  | -0.06585 |
| C | 0.52043  | 2.03860  | 1.49312  | H | 1.59816  | 4.00570  | 4.10762  |
| C | 1.19457  | 2.40682  | 2.70296  | C | -0.36557 | 4.31630  | 1.34677  |
| C | -2.34669 | 0.38553  | -1.76539 | C | 0.31034  | 4.65295  | 2.52186  |
| O | 0.40505  | 1.61309  | -1.86238 | H | 0.23723  | 5.66039  | 2.92414  |
| C | 1.63947  | 1.98893  | -1.96389 | H | -0.96752 | 5.05689  | 0.82880  |
| O | 2.60275  | 1.44764  | -1.39344 | C | -2.80750 | -1.64423 | 1.25414  |
| H | 1.79130  | -0.62317 | -0.88136 | C | -3.81615 | -2.06937 | 0.36890  |
| C | 1.91518  | 3.21653  | -2.87505 | C | -3.09095 | -0.77658 | 2.32174  |
| C | 2.74501  | 1.69226  | 4.45481  | C | -5.11538 | -1.59143 | 0.56656  |
| H | 2.20404  | 2.34308  | 5.15403  | C | -4.40527 | -0.32165 | 2.47431  |

|                |          |          |          |   |          |          |          |
|----------------|----------|----------|----------|---|----------|----------|----------|
| C              | -5.43006 | -0.71204 | 1.60858  | H | -4.00819 | 0.83969  | -0.73277 |
| H              | -5.90266 | -1.92024 | -0.10885 | H | -4.83715 | 1.97223  | -1.79835 |
| H              | -4.63238 | 0.35256  | 3.29752  | C | -2.68512 | 1.92797  | -2.08092 |
| C              | -2.02046 | -0.32819 | 3.28677  | H | -2.73690 | 1.15920  | -2.85559 |
| H              | -1.33710 | 0.38250  | 2.81101  | C | -1.35764 | 1.72412  | -1.25707 |
| H              | -2.46688 | 0.16518  | 4.15581  | C | -2.66667 | 3.31558  | -2.75752 |
| H              | -1.41281 | -1.16450 | 3.65079  | H | -1.79888 | 3.40146  | -3.42545 |
| C              | -3.51331 | -3.00933 | -0.77539 | H | -3.56501 | 3.43254  | -3.38043 |
| H              | -2.82242 | -2.54550 | -1.48781 | C | -0.63564 | -0.56465 | 1.04713  |
| H              | -3.05538 | -3.94565 | -0.43224 | H | -0.97688 | 0.13591  | 1.81747  |
| H              | -4.43118 | -3.27041 | -1.31088 | C | -0.90811 | -1.94506 | 1.41943  |
| C              | -6.83606 | -0.18512 | 1.78036  | C | -1.91032 | -2.24354 | 2.39391  |
| H              | -7.58257 | -0.91765 | 1.45447  | C | 2.39819  | -0.60453 | -1.71060 |
| H              | -7.04404 | 0.07108  | 2.82467  | O | -0.48065 | -1.61242 | -1.77776 |
| H              | -6.99165 | 0.72411  | 1.18460  | C | -1.72784 | -1.67060 | -1.92368 |
| H              | 1.09242  | -1.86068 | -2.05268 | O | -2.51306 | -0.75315 | -1.49161 |
| <b>14a-tsA</b> |          |          |          | H | -1.78861 | 0.26746  | -1.13548 |
| Ru             | 0.18862  | 0.08449  | -0.51613 | C | -2.37758 | -2.86020 | -2.64787 |
| O              | -2.58815 | -1.17206 | 2.89098  | C | -3.62744 | -1.33197 | 3.87548  |
| O              | 1.81408  | 0.37983  | -2.24449 | H | -3.31516 | -2.09580 | 4.59955  |
| O              | 2.01156  | -1.02845 | -0.56150 | C | 3.51308  | -1.35332 | -2.45418 |
| N              | -0.10961 | 2.71935  | 0.64832  | C | 4.50903  | -0.33564 | -3.04257 |
| N              | 1.81554  | 1.93594  | 1.35023  | H | 5.25083  | -0.85061 | -3.66540 |
| C              | 0.74519  | 1.67949  | 0.55339  | H | 3.98957  | 0.40430  | -3.65762 |
| C              | 0.39279  | 3.80723  | 1.50286  | H | 5.04686  | 0.19426  | -2.24799 |
| H              | -0.34386 | 4.08743  | 2.26301  | C | 2.82688  | -2.12543 | -3.60640 |
| H              | 0.62055  | 4.69878  | 0.90853  | H | 2.07356  | -2.81962 | -3.21810 |
| C              | 1.66286  | 3.18970  | 2.11151  | H | 2.32852  | -1.43426 | -4.29313 |
| H              | 2.54363  | 3.82763  | 1.98883  | H | 3.57252  | -2.70117 | -4.16877 |
| H              | 1.55315  | 2.97159  | 3.18137  | C | 4.23822  | -2.33849 | -1.52346 |
| C              | -1.33743 | 2.82768  | -0.15897 | H | 5.02949  | -2.86077 | -2.07624 |
| C              | -1.35038 | 4.22856  | -0.83666 | H | 4.69360  | -1.81924 | -0.67412 |
| H              | -0.45094 | 4.33450  | -1.45830 | H | 3.54695  | -3.08572 | -1.12301 |
| H              | -1.31585 | 5.01920  | -0.07454 | C | -3.10166 | -2.31594 | -3.89933 |
| C              | -2.62031 | 4.41387  | -1.68277 | H | -3.85945 | -1.57794 | -3.62055 |
| H              | -2.59436 | 5.40445  | -2.15649 | H | -2.39563 | -1.84038 | -4.59081 |
| C              | -3.85220 | 4.30833  | -0.76158 | H | -3.59450 | -3.13676 | -4.43428 |
| H              | -3.82122 | 5.10098  | 0.00002  | C | -1.31708 | -3.89366 | -3.05706 |
| H              | -4.77261 | 4.45902  | -1.34202 | H | -0.78728 | -4.28346 | -2.18253 |
| C              | -3.87380 | 2.91872  | -0.09486 | H | -1.79635 | -4.73438 | -3.57349 |
| H              | -4.74888 | 2.83916  | 0.56432  | H | -0.57261 | -3.45581 | -3.72896 |
| C              | -2.59307 | 2.71114  | 0.74222  | C | -3.40865 | -3.50565 | -1.69581 |
| H              | -2.60752 | 1.72420  | 1.21902  | H | -3.90701 | -4.34346 | -2.19884 |
| H              | -2.54315 | 3.46265  | 1.54344  | H | -2.92403 | -3.89198 | -0.79205 |
| C              | -3.93647 | 1.83298  | -1.18344 | H | -4.16865 | -2.77941 | -1.39408 |
|                |          |          |          | C | -3.72879 | 0.01185  | 4.58993  |

|                |          |          |          |   |          |          |          |
|----------------|----------|----------|----------|---|----------|----------|----------|
| H              | -2.77324 | 0.27555  | 5.05380  | H | -0.81199 | -2.62190 | -3.67573 |
| H              | -3.99901 | 0.80179  | 3.88065  | H | -1.28620 | -3.86317 | -2.50241 |
| H              | -4.49609 | -0.03013 | 5.37048  | C | 0.80421  | -3.20912 | -2.32226 |
| C              | -4.93925 | -1.73963 | 3.20368  | H | 0.96098  | -4.11365 | -1.71937 |
| H              | -5.25230 | -0.96556 | 2.49470  | H | 1.43212  | -3.28661 | -3.21436 |
| H              | -4.83610 | -2.68030 | 2.65504  | C | -2.42151 | -1.46089 | -1.52393 |
| H              | -5.72893 | -1.86381 | 3.95348  | C | -3.24642 | -2.57610 | -0.82765 |
| C              | -0.16901 | -3.01970 | 0.87783  | H | -2.81140 | -2.78709 | 0.15622  |
| C              | -2.14998 | -3.56914 | 2.77412  | H | -3.19248 | -3.50590 | -1.41166 |
| H              | 0.60964  | -2.78478 | 0.16211  | C | -4.72310 | -2.14974 | -0.68126 |
| H              | -2.92035 | -3.81036 | 3.49663  | H | -5.28502 | -2.96501 | -0.20554 |
| C              | -0.39889 | -4.33397 | 1.27380  | C | -5.32121 | -1.85004 | -2.06973 |
| C              | -1.39348 | -4.60255 | 2.21611  | H | -5.29311 | -2.74741 | -2.70475 |
| H              | -1.58956 | -5.62541 | 2.52800  | H | -6.37695 | -1.56380 | -1.96813 |
| H              | 0.19384  | -5.14211 | 0.85538  | C | -4.52068 | -0.70926 | -2.72950 |
| C              | 3.05342  | 1.21557  | 1.45217  | H | -4.94715 | -0.48141 | -3.71581 |
| C              | 4.10956  | 1.57460  | 0.59356  | C | -3.06103 | -1.17698 | -2.91248 |
| C              | 3.23147  | 0.25979  | 2.46566  | H | -2.46813 | -0.41025 | -3.42966 |
| C              | 5.34774  | 0.94865  | 0.76650  | H | -3.05556 | -2.07545 | -3.54718 |
| C              | 4.48795  | -0.34185 | 2.59714  | C | -4.57771 | 0.54909  | -1.83685 |
| C              | 5.55699  | -0.01571 | 1.75865  | H | -4.04185 | 1.37898  | -2.31707 |
| H              | 6.17127  | 1.22633  | 0.11150  | H | -5.62377 | 0.86824  | -1.71843 |
| H              | 4.63255  | -1.08349 | 3.38017  | C | -3.95039 | 0.23475  | -0.45394 |
| C              | 2.10551  | -0.13465 | 3.39048  | H | -3.99030 | 1.13482  | 0.17310  |
| H              | 1.34931  | -0.72019 | 2.85670  | C | -2.44719 | -0.15726 | -0.69390 |
| H              | 2.48125  | -0.74490 | 4.21768  | H | -2.13797 | 0.63225  | -1.37815 |
| H              | 1.59516  | 0.73526  | 3.81956  | C | -4.80193 | -0.88250 | 0.19014  |
| C              | 3.91616  | 2.59746  | -0.50218 | H | -4.47014 | -1.10034 | 1.20641  |
| H              | 3.19320  | 2.24081  | -1.24422 | H | -5.84658 | -0.54557 | 0.25723  |
| H              | 3.54517  | 3.55435  | -0.11420 | C | 0.11973  | 1.43292  | -1.49021 |
| H              | 4.86219  | 2.79451  | -1.01579 | H | 0.47034  | 1.11218  | -2.47522 |
| C              | 6.89739  | -0.69847 | 1.90517  | C | -0.27820 | 2.83113  | -1.45956 |
| H              | 7.72065  | -0.03016 | 1.62974  | C | -0.72618 | 3.41646  | -0.24852 |
| H              | 7.06472  | -1.03832 | 2.93281  | C | 2.60699  | 1.41593  | 0.11696  |
| H              | 6.96446  | -1.58105 | 1.25510  | O | -0.23472 | -0.93089 | 1.98133  |
| H              | -0.55160 | 1.93815  | -1.97354 | C | -1.33555 | -1.10779 | 2.52534  |
| <b>14a-tsB</b> |          |          |          | O | -2.44865 | -0.71442 | 1.97088  |
| Ru             | -0.16200 | 0.29628  | -0.01470 | H | -2.25099 | -0.40255 | 0.90728  |
| O              | -0.66092 | 2.58974  | 0.84618  | C | -1.47889 | -1.81569 | 3.87950  |
| O              | 1.77348  | 0.61571  | 0.69780  | C | -0.97403 | 3.11465  | 2.16997  |
| O              | 2.46778  | 1.90741  | -1.01646 | H | -0.66387 | 4.16455  | 2.17959  |
| N              | -1.02727 | -1.91057 | -1.69113 | C | -0.09814 | -2.01255 | 4.52475  |
| N              | 1.16278  | -2.01105 | -1.53783 | H | -0.20988 | -2.51706 | 5.49161  |
| C              | 0.06004  | -1.32212 | -1.12227 | H | 0.55592  | -2.61907 | 3.89236  |
| C              | -0.67136 | -2.96967 | -2.64414 | H | 0.40382  | -1.05453 | 4.69445  |
|                |          |          |          | C | -2.38460 | -0.97356 | 4.80315  |

|   |          |          |          |
|---|----------|----------|----------|
| H | -3.37167 | -0.82110 | 4.35865  |
| H | -2.51036 | -1.48501 | 5.76462  |
| H | -1.94400 | 0.01023  | 5.00299  |
| C | -2.14287 | -3.18862 | 3.62029  |
| H | -1.52547 | -3.80871 | 2.95969  |
| H | -2.26557 | -3.72602 | 4.56806  |
| H | -3.12918 | -3.07060 | 3.16121  |
| C | 3.84388  | 1.83921  | 0.95866  |
| C | 5.09945  | 1.80539  | 0.06665  |
| H | 5.96719  | 2.18560  | 0.62104  |
| H | 5.32217  | 0.78514  | -0.26092 |
| H | 4.95387  | 2.42259  | -0.82391 |
| C | 3.60070  | 3.29988  | 1.40403  |
| H | 2.72008  | 3.38282  | 2.05159  |
| H | 4.46550  | 3.67181  | 1.96808  |
| H | 3.44776  | 3.94787  | 0.53529  |
| C | 4.04038  | 0.93951  | 2.18840  |
| H | 4.19785  | -0.10264 | 1.89306  |
| H | 4.91685  | 1.27207  | 2.76042  |
| H | 3.16774  | 0.96520  | 2.84712  |
| C | 2.54296  | -1.92035 | -1.14450 |
| C | 3.46188  | -1.34277 | -2.04052 |
| C | 2.98048  | -2.58245 | 0.01806  |
| C | 4.82723  | -1.45283 | -1.75570 |
| C | 4.35554  | -2.65382 | 0.26494  |
| C | 5.29591  | -2.10286 | -0.61044 |
| H | 5.54180  | -1.01715 | -2.45120 |
| H | 4.69898  | -3.16962 | 1.15945  |
| C | 2.00785  | -3.20394 | 0.98992  |
| H | 1.41124  | -2.43329 | 1.48811  |
| H | 1.30669  | -3.88748 | 0.49512  |
| H | 2.54409  | -3.77613 | 1.75392  |
| C | 6.77580  | -2.18417 | -0.31544 |
| H | 7.13019  | -1.27039 | 0.18009  |
| H | 7.00734  | -3.02518 | 0.34678  |
| H | 7.36264  | -2.30199 | -1.23326 |
| C | 3.01319  | -0.58716 | -3.26813 |
| H | 2.17314  | -1.07118 | -3.77734 |
| H | 2.69253  | 0.41960  | -2.97602 |
| H | 3.83536  | -0.48808 | -3.98410 |
| C | -0.12141 | 2.35995  | 3.17971  |
| H | -0.37353 | 1.29864  | 3.20414  |
| H | 0.93803  | 2.44093  | 2.92830  |
| H | -0.28338 | 2.78474  | 4.17709  |
| C | -2.47334 | 2.99613  | 2.43066  |
| H | -2.71794 | 3.41838  | 3.41227  |

|   |          |         |          |
|---|----------|---------|----------|
| H | -3.05525 | 3.53227 | 1.67415  |
| H | -2.77546 | 1.94433 | 2.41909  |
| C | -0.27978 | 3.62431 | -2.62113 |
| C | -1.18373 | 4.73580 | -0.22456 |
| C | -1.18199 | 5.48856 | -1.40356 |
| C | -0.72923 | 4.94159 | -2.60473 |
| H | -1.55227 | 5.19004 | 0.68663  |
| H | -1.54277 | 6.51319 | -1.37185 |
| H | -0.72751 | 5.53551 | -3.51384 |
| H | 0.08234  | 3.17993 | -3.54476 |

#### 14a-tsC

|    |          |          |          |
|----|----------|----------|----------|
| Ru | -0.03649 | 0.40419  | -0.06029 |
| O  | 2.35481  | -3.08127 | 1.75923  |
| O  | -1.67837 | 2.06161  | -0.57432 |
| O  | -1.94502 | 0.43867  | 0.88646  |
| N  | 0.59044  | -0.91347 | -2.49214 |
| N  | -1.37618 | -1.68608 | -1.88531 |
| C  | -0.39024 | -0.81096 | -1.56390 |
| C  | 0.33897  | -1.95845 | -3.49330 |
| H  | 1.09889  | -2.74700 | -3.43645 |
| H  | 0.35638  | -1.54824 | -4.50796 |
| C  | -1.05933 | -2.46976 | -3.09629 |
| H  | -1.80652 | -2.28997 | -3.87636 |
| H  | -1.07044 | -3.54098 | -2.86560 |
| C  | 1.87250  | -0.20103 | -2.36238 |
| C  | 2.35751  | 0.22389  | -3.77609 |
| H  | 1.59787  | 0.86438  | -4.24376 |
| H  | 2.47657  | -0.66136 | -4.41631 |
| C  | 2.95264  | -1.13294 | -1.75340 |
| H  | 2.63896  | -1.47449 | -0.76412 |
| H  | 3.06021  | -2.02367 | -2.38900 |
| C  | 1.66586  | 1.09080  | -1.50242 |
| C  | 0.75456  | -1.03515 | 0.86548  |
| H  | 0.90829  | -1.99303 | 0.36048  |
| C  | 1.13172  | -1.11590 | 2.26558  |
| C  | 1.92028  | -2.21877 | 2.72425  |
| C  | -2.35951 | 1.52964  | 0.35245  |
| O  | -0.19381 | 2.95043  | 2.49583  |
| C  | 0.63428  | 3.10559  | 1.60860  |
| O  | 1.24428  | 2.05521  | 1.05189  |
| H  | 1.42885  | 1.59759  | -0.11173 |
| C  | 1.07524  | 4.51605  | 1.15814  |
| C  | 3.06953  | -4.28555 | 2.09634  |
| H  | 3.82081  | -4.04894 | 2.86065  |
| C  | -3.65200 | 2.18458  | 0.86277  |



|   |          |          |          |   |          |          |          |
|---|----------|----------|----------|---|----------|----------|----------|
| C | 3.38184  | -0.84109 | -2.18318 | H | -0.17526 | -2.57794 | 3.24418  |
| H | 3.26386  | 0.24296  | -2.10320 | H | 1.14994  | -2.63292 | 4.42630  |
| H | 3.46556  | -1.08668 | -3.25097 | H | 1.48209  | -2.23267 | 2.73258  |
| C | 2.29963  | -3.07639 | -1.77811 | C | -2.10297 | -2.22026 | 0.94483  |
| H | 1.40825  | -3.58428 | -1.38896 | C | -3.33483 | -2.94375 | 1.52416  |
| H | 2.37768  | -3.32353 | -2.84717 | H | 2.04219  | 0.14554  | 0.15681  |
| C | 1.98804  | -1.25511 | -0.07839 | O | 2.58644  | 1.30207  | 0.44719  |
| C | -2.28792 | 0.56110  | -2.38288 | C | 2.48121  | 2.23799  | -0.44740 |
| C | -2.40946 | 1.95957  | -2.49268 | O | 1.95477  | 2.10392  | -1.56411 |
| C | -3.67870 | 2.52695  | -2.32631 | C | 3.11183  | 3.60724  | -0.07120 |
| H | -3.77919 | 3.60858  | -2.39444 | C | 3.31787  | -1.67480 | 0.63070  |
| C | -4.81504 | 1.74900  | -2.09132 | C | 4.65701  | -1.32625 | -1.46566 |
| C | -4.66734 | 0.35854  | -2.06136 | C | 3.57150  | -3.55388 | -1.04219 |
| H | -5.54661 | -0.26709 | -1.92100 | H | 3.66696  | -4.64121 | -1.16258 |
| C | -3.42197 | -0.25588 | -2.21624 | C | 4.80340  | -2.85031 | -1.64672 |
| C | -1.23849 | 2.84709  | -2.85539 | H | 5.71916  | -3.20331 | -1.15277 |
| H | -1.15404 | 2.93788  | -3.94818 | H | 4.89745  | -3.10138 | -2.71294 |
| H | -0.27578 | 2.48013  | -2.48944 | H | 5.52467  | -0.81704 | -1.90570 |
| H | -1.38856 | 3.86132  | -2.46978 | C | 4.56054  | -0.98784 | 0.03206  |
| C | -6.16563 | 2.39004  | -1.87147 | C | 3.47549  | -3.20720 | 0.45941  |
| H | -6.97668 | 1.75763  | -2.24894 | H | 4.38256  | -3.55026 | 0.97718  |
| H | -6.23410 | 3.36351  | -2.36869 | H | 2.62577  | -3.73379 | 0.91544  |
| H | -6.35454 | 2.55539  | -0.80233 | H | 3.24830  | -1.42721 | 1.69617  |
| C | -3.32512 | -1.76160 | -2.28146 | H | 5.45787  | -1.34765 | 0.55571  |
| H | -3.22869 | -2.10241 | -3.32183 | H | 4.50104  | 0.09230  | 0.18082  |
| H | -4.23088 | -2.22370 | -1.87851 | C | -3.56548 | -4.25364 | 0.74478  |
| H | -2.46730 | -2.15186 | -1.72981 | H | -2.66254 | -4.87008 | 0.74698  |
| C | -0.46835 | 1.35396  | 0.42550  | H | -4.38270 | -4.82421 | 1.20268  |
| H | -0.52180 | 2.00691  | -0.44427 | H | -3.83728 | -4.05607 | -0.29799 |
| C | -0.75757 | 1.99351  | 1.69227  | C | -4.58728 | -2.05344 | 1.47371  |
| C | -1.26209 | 3.30729  | 1.75743  | H | -5.44656 | -2.59650 | 1.88682  |
| H | -1.40871 | 3.84877  | 0.82676  | H | -4.44521 | -1.13665 | 2.05281  |
| C | -1.57773 | 3.90046  | 2.97554  | H | -4.82938 | -1.75734 | 0.44860  |
| H | -1.96773 | 4.91323  | 3.00935  | C | -3.01019 | -3.28781 | 2.99669  |
| C | -1.38623 | 3.17765  | 4.15510  | H | -2.80888 | -2.38118 | 3.57998  |
| H | -1.62760 | 3.62722  | 5.11444  | H | -3.86253 | -3.80162 | 3.45768  |
| C | -0.88104 | 1.87416  | 4.12810  | H | -2.13813 | -3.94627 | 3.06261  |
| H | -0.73909 | 1.34304  | 5.06139  | C | 2.09276  | 4.71919  | -0.38823 |
| C | -0.57018 | 1.28291  | 2.90270  | H | 1.21024  | 4.63964  | 0.25888  |
| C | 0.56939  | -0.64159 | 3.89386  | H | 2.53920  | 5.70821  | -0.22423 |
| H | -0.12798 | -0.57822 | 4.73700  | H | 1.76167  | 4.65006  | -1.42795 |
| C | 1.87894  | 0.07199  | 4.22254  | C | 4.35418  | 3.78590  | -0.97230 |
| H | 2.53484  | 0.08020  | 3.34669  | H | 4.82108  | 4.76337  | -0.79604 |
| H | 2.38801  | -0.44836 | 5.04153  | H | 5.10593  | 3.01351  | -0.76697 |
| H | 1.71366  | 1.10859  | 4.52844  | H | 4.07407  | 3.71824  | -2.02817 |
| C | 0.76275  | -2.10889 | 3.54522  | C | 3.52205  | 3.67454  | 1.40755  |



H 3.96216 4.65473 1.63382  
H 2.65824 3.52879 2.06485  
H 4.25703 2.90237 1.65269  
H 1.28522 -2.01803 0.31446

**14a-tsE**

Ru -0.11665 -0.41042 0.27860  
O -1.29306 3.42060 -2.00342  
O 0.76565 -2.11066 1.70660  
O 1.72265 -0.15502 1.37124  
N -0.18184 -2.01336 -2.13887  
N 1.85001 -1.20113 -1.99544  
C 0.63380 -1.23557 -1.39316  
C 0.54491 -2.74012 -3.19103  
H -0.00340 -2.73995 -4.13588  
H 0.71944 -3.78340 -2.89337  
C 1.85255 -1.94126 -3.27180  
H 2.74093 -2.57318 -3.35616  
H 1.85440 -1.23616 -4.11438  
C -1.45253 -2.47775 -1.55714  
C -1.20473 -3.67369 -0.60112  
H -0.52891 -3.36753 0.20251  
H -0.71368 -4.48626 -1.15694  
C -2.54231 -4.17361 -0.02396  
H -2.34926 -5.00827 0.66281  
C -3.45642 -4.64531 -1.17340  
H -2.98856 -5.48392 -1.70899  
H -4.41067 -5.01509 -0.77329  
C -3.71442 -3.47218 -2.14107  
H -4.34961 -3.80850 -2.97181  
C -2.37623 -2.96198 -2.70538  
H -2.54647 -2.13903 -3.41324  
H -1.88673 -3.77460 -3.26049  
C -4.39493 -2.32559 -1.38005  
H -4.61550 -1.49204 -2.06119  
H -5.35659 -2.66369 -0.96754  
C -3.48073 -1.84342 -0.23354  
H -4.00279 -1.05139 0.30306  
C -2.13442 -1.28154 -0.81529  
H -2.38685 -0.54710 -1.59395  
C -3.21114 -3.01217 0.73443  
H -2.56578 -2.67933 1.55760  
H -4.15818 -3.34754 1.18074  
C -0.32355 1.22585 -0.63514  
H -0.69098 1.22301 -1.66743  
C -0.12365 2.57095 -0.12826

C -0.64104 3.69889 -0.84327  
C 1.61908 -1.24191 2.04403  
O -0.93265 0.35031 2.18151  
C -2.12244 0.75638 2.09328  
O -2.82179 0.57816 1.03721  
H -2.11917 -0.24948 0.26888  
C -2.78918 1.48670 3.26899  
C -1.93690 4.45225 -2.77649  
H -1.27551 5.32753 -2.82202  
C 2.47849 -1.43644 3.30238  
C 2.94667 -2.90090 3.39206  
H 3.46986 -3.07140 4.34103  
H 2.09551 -3.58429 3.33283  
H 3.63858 -3.14952 2.57898  
C 1.56022 -1.11908 4.50753  
H 1.17079 -0.09760 4.44439  
H 0.70752 -1.80480 4.53712  
H 2.12272 -1.22044 5.44413  
C 3.68416 -0.48239 3.30296  
H 4.28497 -0.64058 4.20731  
H 4.32497 -0.64766 2.43040  
H 3.36094 0.56202 3.27992  
C -3.96466 0.61389 3.76275  
H -4.68462 0.43583 2.95850  
H -3.61036 -0.35736 4.12835  
H -4.48302 1.11553 4.58891  
C -1.78544 1.71691 4.40886  
H -0.93981 2.32454 4.07180  
H -2.27720 2.23989 5.23815  
H -1.38647 0.77045 4.78545  
C -3.32925 2.83982 2.75653  
H -3.83443 3.37275 3.57134  
H -2.51520 3.47534 2.38896  
H -4.04214 2.69176 1.94061  
C -2.08708 3.87521 -4.18016  
H -1.11008 3.60569 -4.59317  
H -2.71311 2.97664 -4.15815  
H -2.55654 4.60908 -4.84404  
C -3.27905 4.83096 -2.15009  
H -3.93966 3.95760 -2.12451  
H -3.15779 5.19509 -1.12579  
H -3.76477 5.61737 -2.73899  
C 0.58521 2.81616 1.07071  
C -0.45979 4.99356 -0.34108  
H 1.00121 1.96332 1.59378  
H -0.86116 5.85351 -0.86357

|                |          |          |          |   |          |          |          |
|----------------|----------|----------|----------|---|----------|----------|----------|
| C              | 0.77400  | 4.10589  | 1.55496  | H | -4.71893 | -4.53916 | 0.14895  |
| C              | 0.24453  | 5.18848  | 0.84856  | H | -5.81570 | -3.61356 | 1.17677  |
| H              | 0.37867  | 6.20150  | 1.21991  | C | -5.13697 | -2.52826 | -0.58570 |
| H              | 1.33082  | 4.26898  | 2.47295  | H | -5.97351 | -2.86305 | -1.21341 |
| C              | 3.02351  | -0.47351 | -1.60639 | C | -3.86691 | -2.45890 | -1.46110 |
| C              | 4.01526  | -1.16034 | -0.87508 | H | -4.01514 | -1.75931 | -2.29556 |
| C              | 3.22493  | 0.84638  | -2.03599 | H | -3.70185 | -3.45195 | -1.89305 |
| C              | 5.19165  | -0.48548 | -0.55149 | C | -5.44332 | -1.13901 | 0.00101  |
| C              | 4.42115  | 1.48560  | -1.67860 | H | -5.63198 | -0.41907 | -0.80756 |
| C              | 5.40994  | 0.84519  | -0.93406 | H | -6.35368 | -1.17878 | 0.61494  |
| H              | 5.95985  | -1.00994 | 0.01362  | C | -4.24172 | -0.68639 | 0.84756  |
| H              | 4.57945  | 2.51292  | -2.00194 | H | -4.42613 | 0.31607  | 1.25422  |
| C              | 2.22234  | 1.59487  | -2.88384 | C | -2.96952 | -0.62375 | -0.02576 |
| H              | 1.84611  | 2.47753  | -2.35530 | H | -3.10203 | 0.10189  | -0.83817 |
| H              | 2.68812  | 1.94545  | -3.81351 | C | -4.01469 | -1.68053 | 2.00411  |
| H              | 1.35856  | 0.98079  | -3.14541 | H | -3.17540 | -1.34541 | 2.62623  |
| C              | 3.82176  | -2.60121 | -0.46496 | H | -4.90377 | -1.72253 | 2.64870  |
| H              | 2.87591  | -2.75002 | 0.06447  | C | 2.15804  | -1.97785 | -1.94493 |
| H              | 3.81433  | -3.27327 | -1.33400 | C | 3.03570  | -3.06233 | -1.77566 |
| H              | 4.63685  | -2.92782 | 0.18807  | C | 4.41173  | -2.81848 | -1.85719 |
| C              | 6.68051  | 1.56159  | -0.53918 | H | 5.09735  | -3.65292 | -1.72298 |
| H              | 7.56206  | 0.92632  | -0.68496 | C | 4.92679  | -1.53732 | -2.07173 |
| H              | 6.82252  | 2.47682  | -1.12295 | C | 4.02709  | -0.47421 | -2.18663 |
| H              | 6.66038  | 1.84628  | 0.52093  | H | 4.40404  | 0.53793  | -2.31845 |
| <b>14a-tsF</b> |          |          |          | C | 2.64209  | -0.66929 | -2.12531 |
| Ru             | 0.58305  | 0.05179  | -0.04770 | C | 2.54935  | -4.45696 | -1.45583 |
| O              | -2.06347 | 3.42925  | -1.73617 | H | 3.32223  | -5.01079 | -0.91390 |
| O              | 1.80602  | -1.59753 | 1.20441  | H | 2.31338  | -5.04126 | -2.35667 |
| O              | -0.11899 | -0.72141 | 1.82469  | H | 1.65301  | -4.42987 | -0.82803 |
| N              | -1.41790 | -1.99491 | -1.49569 | C | 6.41651  | -1.30746 | -2.18294 |
| N              | 0.74131  | -2.20104 | -1.91764 | H | 6.74405  | -1.30964 | -3.23174 |
| C              | -0.17537 | -1.50060 | -1.18639 | H | 6.98209  | -2.08882 | -1.66396 |
| C              | -1.30627 | -3.12957 | -2.44702 | H | 6.70537  | -0.34059 | -1.75649 |
| H              | -2.05126 | -3.05409 | -3.23995 | C | 1.69584  | 0.47991  | -2.14527 |
| H              | -1.45135 | -4.08370 | -1.92313 | H | 0.76897  | 0.27106  | -2.68019 |
| C              | 0.11233  | -2.99825 | -2.97627 | H | 2.14786  | 1.32312  | -2.68793 |
| H              | 0.60630  | -3.96006 | -3.11845 | H | 1.89480  | 1.41841  | -1.11168 |
| H              | 0.15398  | -2.44609 | -3.92617 | C | -0.69008 | 1.33403  | -0.56226 |
| C              | -2.64268 | -2.00671 | -0.61957 | H | -1.00097 | 1.38906  | -1.61125 |
| C              | -2.44306 | -3.00668 | 0.55046  | C | -1.28137 | 2.38983  | 0.24177  |
| H              | -1.59222 | -2.67239 | 1.15215  | C | -1.19702 | 2.38096  | 1.65330  |
| H              | -2.20681 | -4.00666 | 0.16079  | H | -0.68775 | 1.54767  | 2.12246  |
| C              | -3.71753 | -3.07657 | 1.42045  | C | -1.76377 | 3.38871  | 2.42527  |
| H              | -3.55146 | -3.79290 | 2.23598  | H | -1.69126 | 3.35519  | 3.50831  |
| C              | -4.91008 | -3.53746 | 0.55973  | C | -2.42948 | 4.44221  | 1.79413  |
|                |          |          |          | H | -2.87272 | 5.24021  | 2.38475  |

|   |          |          |          |    |          |          |          |
|---|----------|----------|----------|----|----------|----------|----------|
| C | -2.54077 | 4.49016  | 0.40358  | Ru | -0.17418 | -0.06317 | -0.47393 |
| H | -3.06087 | 5.32257  | -0.05471 | O  | 2.87538  | -0.00436 | 2.86154  |
| C | -1.98251 | 3.47181  | -0.37959 | O  | -1.79151 | 0.29487  | -2.18725 |
| C | -2.66700 | 4.49744  | -2.49198 | O  | -1.98580 | 1.25996  | -0.21580 |
| H | -3.59100 | 4.81067  | -1.98851 | N  | -0.20819 | -2.95413 | -0.37239 |
| C | -3.02510 | 3.88819  | -3.84340 | N  | -1.94243 | -2.27350 | 0.78279  |
| H | -2.12308 | 3.52988  | -4.35108 | C  | -0.88533 | -1.85749 | 0.03344  |
| H | -3.50816 | 4.63642  | -4.48095 | C  | -0.72711 | -4.21157 | 0.16909  |
| H | -3.70915 | 3.04340  | -3.71664 | H  | 0.00271  | -4.68027 | 0.84071  |
| C | -1.70223 | 5.67707  | -2.61625 | H  | -0.95386 | -4.92537 | -0.63039 |
| H | -1.41659 | 6.07018  | -1.63621 | C  | -1.98943 | -3.74473 | 0.92185  |
| H | -2.16560 | 6.48815  | -3.18940 | H  | -2.90901 | -4.14397 | 0.48137  |
| H | -0.79077 | 5.36193  | -3.13575 | H  | -1.97984 | -4.02445 | 1.98124  |
| C | 0.91412  | -1.45067 | 2.07650  | C  | 1.06007  | -2.79887 | -1.08195 |
| C | 1.05770  | -2.11892 | 3.45257  | C  | 1.18816  | -3.78961 | -2.26579 |
| C | 1.24053  | -3.63608 | 3.23514  | H  | 0.33386  | -3.66017 | -2.94286 |
| H | 2.09041  | -3.83041 | 2.57495  | H  | 1.17454  | -4.83304 | -1.91501 |
| H | 0.34636  | -4.08372 | 2.78332  | C  | 2.51817  | -3.51649 | -3.00655 |
| H | 1.41829  | -4.13786 | 4.19429  | H  | 2.59317  | -4.19511 | -3.86678 |
| C | 2.32982  | -1.53814 | 4.10987  | C  | 3.69567  | -3.76776 | -2.04355 |
| H | 3.20435  | -1.71449 | 3.47731  | H  | 3.68925  | -4.81106 | -1.69663 |
| H | 2.49935  | -2.00826 | 5.08658  | H  | 4.64934  | -3.61013 | -2.56595 |
| H | 2.23305  | -0.45701 | 4.26288  | C  | 3.58316  | -2.80729 | -0.84404 |
| C | -0.16385 | -1.85139 | 4.34493  | H  | 4.41405  | -2.98650 | -0.14763 |
| H | -0.02374 | -2.32746 | 5.32353  | C  | 2.24765  | -3.03875 | -0.11482 |
| H | -1.08118 | -2.25259 | 3.90123  | H  | 2.16497  | -2.35858 | 0.73929  |
| H | -0.31298 | -0.77890 | 4.50301  | H  | 2.20620  | -4.06615 | 0.27564  |
| H | -2.13865 | -0.28995 | 0.59078  | C  | 3.61458  | -1.34589 | -1.32765 |
| O | 1.64922  | 1.43342  | 1.25242  | H  | 3.57866  | -0.68488 | -0.45399 |
| C | 2.36768  | 2.32010  | 0.71640  | H  | 4.56196  | -1.13506 | -1.84337 |
| O | 2.49607  | 2.43028  | -0.54995 | C  | 2.43143  | -1.08643 | -2.28559 |
| C | 3.11137  | 3.33664  | 1.59642  | H  | 2.47815  | -0.05536 | -2.65597 |
| C | 2.97967  | 2.97112  | 3.08285  | C  | 1.05242  | -1.35537 | -1.63905 |
| H | 3.50843  | 3.71077  | 3.69652  | C  | 2.57350  | -2.05221 | -3.49433 |
| H | 1.93114  | 2.94887  | 3.39352  | H  | 1.76981  | -1.86123 | -4.21754 |
| H | 3.40800  | 1.98463  | 3.28778  | H  | 3.52502  | -1.87577 | -4.01736 |
| C | 4.59727  | 3.35592  | 1.18058  | C  | 0.69381  | 0.01089  | 1.19225  |
| H | 5.14284  | 4.10038  | 1.77309  | H  | 0.87728  | -0.89311 | 1.78518  |
| H | 5.06788  | 2.38002  | 1.34978  | C  | 1.08341  | 1.21536  | 1.94267  |
| H | 4.70331  | 3.60591  | 0.12145  | C  | 2.19574  | 1.18183  | 2.83170  |
| C | 2.48020  | 4.72356  | 1.33478  | C  | -2.35093 | 1.14541  | -1.43059 |
| H | 2.56031  | 4.99604  | 0.27814  | O  | 0.60809  | 1.97157  | -1.30379 |
| H | 1.41983  | 4.73160  | 1.61321  | C  | 1.75769  | 2.40329  | -1.25860 |
| H | 2.99442  | 5.48674  | 1.93166  | O  | 2.73660  | 1.73270  | -0.65419 |
|   |          |          |          | H  | 2.32539  | 0.91463  | -0.28325 |
|   |          |          |          | C  | 2.21212  | 3.71774  | -1.88777 |

15a

|   |          |          |          |               |          |          |          |
|---|----------|----------|----------|---------------|----------|----------|----------|
| C | 4.00593  | -0.19246 | 3.73187  | C             | -5.34858 | -0.78461 | 0.75051  |
| H | 3.79912  | 0.29704  | 4.69274  | C             | -4.32470 | -0.30813 | 2.86686  |
| C | -3.43300 | 2.08413  | -1.99870 | C             | -5.43070 | -0.20326 | 2.02134  |
| C | -4.41632 | 1.27744  | -2.86762 | H             | -6.20592 | -0.72703 | 0.08263  |
| H | -5.13382 | 1.95249  | -3.35090 | H             | -4.37349 | 0.12610  | 3.86347  |
| H | -3.88337 | 0.71929  | -3.64215 | C             | -1.98064 | -1.04237 | 3.42590  |
| H | -4.98492 | 0.56294  | -2.26213 | H             | -1.21132 | -0.30897 | 3.15981  |
| C | -2.70869 | 3.12137  | -2.88657 | H             | -2.30120 | -0.83513 | 4.45194  |
| H | -1.98796 | 3.70168  | -2.30111 | H             | -1.50258 | -2.02767 | 3.40971  |
| H | -2.16798 | 2.62596  | -3.69947 | C             | -4.14116 | -2.03771 | -1.07729 |
| H | -3.43514 | 3.81776  | -3.32432 | H             | -3.35829 | -1.56368 | -1.67930 |
| C | -4.18620 | 2.80175  | -0.86701 | H             | -3.93575 | -3.11510 | -1.05974 |
| H | -4.95029 | 3.46847  | -1.28706 | H             | -5.09658 | -1.89922 | -1.59255 |
| H | -4.68019 | 2.08297  | -0.20505 | C             | -6.67773 | 0.53165  | 2.45600  |
| H | -3.50382 | 3.39839  | -0.25497 | H             | -7.58494 | 0.03424  | 2.09448  |
| C | 3.20174  | 3.38119  | -3.02904 | H             | -6.74148 | 0.60316  | 3.54686  |
| H | 4.07526  | 2.84127  | -2.65199 | H             | -6.69047 | 1.55561  | 2.05944  |
| H | 2.72304  | 2.76889  | -3.80202 | H             | 0.32407  | -1.34527 | -2.46996 |
| H | 3.54547  | 4.30947  | -3.49954 |               |          |          |          |
| C | 0.99793  | 4.47377  | -2.44592 |               |          |          |          |
| H | 0.28670  | 4.72244  | -1.65204 | <b>16a-ts</b> |          |          |          |
| H | 1.33075  | 5.40726  | -2.91358 | Ru            | 0.12198  | 0.28682  | -0.98117 |
| H | 0.46659  | 3.88003  | -3.19465 | O             | -0.83490 | -2.23955 | 2.65000  |
| C | 2.92496  | 4.56770  | -0.81136 | N             | 0.49698  | 2.52623  | 0.81980  |
| H | 3.23087  | 5.52564  | -1.24748 | N             | 2.45232  | 1.54369  | 0.66923  |
| H | 2.26049  | 4.77278  | 0.03511  | C             | 1.17474  | 1.52607  | 0.20832  |
| H | 3.81486  | 4.06079  | -0.42859 | C             | 1.28983  | 3.21490  | 1.85062  |
| C | 4.11028  | -1.69741 | 3.95831  | H             | 0.92404  | 2.95781  | 2.85258  |
| H | 3.18951  | -2.08453 | 4.40552  | H             | 1.24103  | 4.30127  | 1.74204  |
| H | 4.27736  | -2.21596 | 3.00780  | C             | 2.69932  | 2.66659  | 1.59424  |
| H | 4.94659  | -1.92467 | 4.62834  | H             | 3.35711  | 3.40714  | 1.12246  |
| C | 5.26943  | 0.39349  | 3.09972  | H             | 3.19354  | 2.31225  | 2.50386  |
| H | 5.48300  | -0.11336 | 2.15212  | C             | -0.93240 | 2.79722  | 0.60496  |
| H | 5.15885  | 1.46251  | 2.89585  | C             | -1.08965 | 4.31176  | 0.28340  |
| H | 6.12889  | 0.25771  | 3.76626  | H             | -0.49692 | 4.54834  | -0.61039 |
| C | 0.34595  | 2.41248  | 1.85122  | H             | -0.68820 | 4.91650  | 1.10766  |
| C | 2.53865  | 2.31077  | 3.58235  | C             | -2.56770 | 4.67493  | 0.07068  |
| H | -0.52012 | 2.42544  | 1.19670  | H             | -2.64570 | 5.74562  | -0.16046 |
| H | 3.39307  | 2.29835  | 4.24898  | C             | -3.35082 | 4.36145  | 1.36178  |
| C | 0.68367  | 3.53402  | 2.60866  | H             | -2.95951 | 4.96296  | 2.19489  |
| C | 1.78022  | 3.47980  | 3.46908  | H             | -4.40739 | 4.63544  | 1.23954  |
| H | 2.05594  | 4.34766  | 4.06281  | C             | -3.23341 | 2.85717  | 1.67985  |
| H | 0.08597  | 4.43854  | 2.53695  | H             | -3.78810 | 2.62996  | 2.60000  |
| C | -3.09468 | -1.51642 | 1.18682  | C             | -1.75174 | 2.47446  | 1.88189  |
| C | -4.19635 | -1.44156 | 0.31096  | H             | -1.65829 | 1.40498  | 2.10947  |
| C | -3.15018 | -0.96164 | 2.47496  | H             | -1.34312 | 3.02962  | 2.73727  |
|   |          |          |          | C             | -3.80560 | 2.04203  | 0.50813  |

|   |          |          |          |            |          |          |          |
|---|----------|----------|----------|------------|----------|----------|----------|
| H | -3.78421 | 0.97260  | 0.73220  | H          | 0.28001  | -5.09697 | -1.61950 |
| H | -4.85717 | 2.31434  | 0.34057  | C          | 3.60018  | 0.79100  | 0.23634  |
| C | -2.99220 | 2.33876  | -0.76928 | C          | 4.35916  | 1.25957  | -0.85329 |
| H | -3.39795 | 1.75767  | -1.60080 | C          | 4.01920  | -0.31692 | 0.99081  |
| C | -1.47509 | 1.95862  | -0.58615 | C          | 5.53499  | 0.58287  | -1.18134 |
| C | -3.11825 | 3.84189  | -1.09828 | C          | 5.20320  | -0.96477 | 0.61896  |
| H | -2.57208 | 4.07826  | -2.02185 | C          | 5.97096  | -0.53684 | -0.46522 |
| H | -4.17391 | 4.08917  | -1.27857 | H          | 6.12132  | 0.93534  | -2.02752 |
| C | 0.08438  | -0.92129 | 0.43578  | H          | 5.53137  | -1.82633 | 1.19711  |
| H | 0.21131  | -0.53727 | 1.45182  | C          | 3.22721  | -0.83841 | 2.16709  |
| C | -0.12413 | -2.35825 | 0.39829  | H          | 2.42520  | -1.50700 | 1.83292  |
| C | -0.57572 | -3.03462 | 1.57479  | H          | 3.87218  | -1.40899 | 2.84341  |
| O | -1.19494 | -0.93339 | -2.27894 | H          | 2.75475  | -0.03656 | 2.74351  |
| C | -2.36243 | -1.07321 | -1.82966 | C          | 3.90524  | 2.43070  | -1.69033 |
| O | -2.78760 | -0.42505 | -0.80688 | H          | 3.03974  | 2.13869  | -2.29607 |
| H | -1.91361 | 0.52753  | -0.57235 | H          | 3.61328  | 3.29764  | -1.08620 |
| C | -3.35057 | -2.03068 | -2.51433 | H          | 4.70164  | 2.75044  | -2.36933 |
| C | -1.26261 | -2.79575 | 3.90822  | C          | 7.22829  | -1.27074 | -0.86974 |
| H | -0.70710 | -3.72471 | 4.09153  | H          | 8.00990  | -0.57740 | -1.20061 |
| C | -4.51035 | -1.18218 | -3.08291 | H          | 7.63005  | -1.86601 | -0.04299 |
| H | -5.00634 | -0.61482 | -2.28955 | H          | 7.03125  | -1.95755 | -1.70340 |
| H | -4.15045 | -0.47554 | -3.84073 | H          | -0.99383 | 2.32372  | -1.51428 |
| H | -5.25274 | -1.83390 | -3.55925 | Cl         | 1.88123  | -0.46096 | -2.40376 |
| C | -2.65998 | -2.80776 | -3.64537 |            |          |          |          |
| H | -1.83180 | -3.41021 | -3.26064 | <b>17a</b> |          |          |          |
| H | -3.38089 | -3.47879 | -4.12842 | Ru         | 0.27546  | 0.13042  | -0.87505 |
| H | -2.25197 | -2.13260 | -4.40315 | O          | -1.77892 | -0.92707 | 2.91970  |
| C | -3.90077 | -3.00900 | -1.45364 | N          | 1.13058  | 2.73803  | 0.01966  |
| H | -4.63129 | -3.68464 | -1.91502 | N          | 2.84889  | 1.40644  | 0.33160  |
| H | -3.09766 | -3.61912 | -1.02535 | C          | 1.56849  | 1.45692  | -0.11661 |
| H | -4.39121 | -2.46748 | -0.63983 | C          | 2.07735  | 3.60601  | 0.72500  |
| C | -0.87016 | -1.76972 | 4.96642  | H          | 1.71025  | 3.84994  | 1.73052  |
| H | 0.20990  | -1.59347 | 4.95108  | H          | 2.23656  | 4.54608  | 0.18742  |
| H | -1.37965 | -0.81757 | 4.78185  | C          | 3.34097  | 2.72927  | 0.77188  |
| H | -1.15149 | -2.12511 | 5.96354  | H          | 4.12011  | 3.09005  | 0.09125  |
| C | -2.76677 | -3.07000 | 3.88640  | H          | 3.77724  | 2.65703  | 1.77328  |
| H | -3.31492 | -2.13657 | 3.71891  | C          | -0.30366 | 3.00610  | -0.09598 |
| H | -3.03821 | -3.76997 | 3.09096  | C          | -0.59390 | 4.38048  | -0.74543 |
| H | -3.08981 | -3.49543 | 4.84343  | H          | -0.10138 | 4.43232  | -1.72530 |
| C | 0.17114  | -3.13514 | -0.74308 | H          | -0.18797 | 5.19926  | -0.13236 |
| C | -0.73077 | -4.42499 | 1.57075  | C          | -2.12380 | 4.55539  | -0.89346 |
| H | 0.54350  | -2.62295 | -1.62223 | H          | -2.32750 | 5.51851  | -1.37981 |
| H | -1.08986 | -4.94729 | 2.44926  | C          | -2.78124 | 4.52782  | 0.50161  |
| C | 0.03061  | -4.51979 | -0.73419 | H          | -2.39339 | 5.34799  | 1.12235  |
| C | -0.42591 | -5.15740 | 0.42045  | H          | -3.86498 | 4.68224  | 0.40856  |
| H | -0.54800 | -6.23754 | 0.43702  | C          | -2.49212 | 3.17202  | 1.17325  |



|   |          |          |          |            |          |          |          |
|---|----------|----------|----------|------------|----------|----------|----------|
| H | -1.83121 | -4.05768 | -2.00846 | C          | -0.63711 | 5.28858  | 1.04962  |
| C | -3.20605 | -4.16456 | -0.34808 | H          | -0.68892 | 6.34068  | 1.31886  |
| H | -3.33505 | -5.25080 | -0.44729 | H          | 0.82739  | 4.79956  | 2.55903  |
| C | -4.32785 | -3.43364 | -1.11303 | C          | 3.05262  | -0.66468 | -1.29688 |
| H | -4.31573 | -3.72881 | -2.17230 | C          | 3.99456  | -1.54479 | -0.73118 |
| H | -5.30900 | -3.72195 | -0.71184 | C          | 3.40673  | 0.64636  | -1.65623 |
| C | -4.13123 | -1.91062 | -0.97499 | C          | 5.29681  | -1.07952 | -0.52242 |
| H | -4.92645 | -1.38483 | -1.52065 | C          | 4.72102  | 1.06627  | -1.42667 |
| C | -2.76331 | -1.49642 | -1.55726 | C          | 5.67931  | 0.22360  | -0.85733 |
| H | -2.62349 | -0.41361 | -1.45957 | H          | 6.03089  | -1.75601 | -0.08882 |
| H | -2.72278 | -1.73698 | -2.62959 | H          | 5.00090  | 2.08120  | -1.70200 |
| C | -4.17216 | -1.52316 | 0.51360  | C          | 2.40270  | 1.60194  | -2.25354 |
| H | -4.08759 | -0.43944 | 0.63146  | H          | 1.68973  | 1.93878  | -1.49320 |
| H | -5.13641 | -1.81936 | 0.95075  | H          | 2.90413  | 2.48580  | -2.66018 |
| C | -3.02896 | -2.23768 | 1.26479  | H          | 1.82047  | 1.14322  | -3.06050 |
| H | -3.06699 | -1.96645 | 2.32264  | C          | 3.61766  | -2.95381 | -0.33316 |
| C | -1.61464 | -1.84041 | 0.69270  | H          | 2.88107  | -2.94732 | 0.47789  |
| C | -3.22982 | -3.76291 | 1.13518  | H          | 3.18189  | -3.51778 | -1.16722 |
| H | -2.44430 | -4.29760 | 1.68624  | H          | 4.49893  | -3.50399 | 0.01120  |
| H | -4.19022 | -4.04685 | 1.58901  | C          | 7.08476  | 0.71286  | -0.59318 |
| C | -0.43652 | 1.17102  | -0.07169 | H          | 7.80912  | -0.10813 | -0.62688 |
| H | -0.78521 | 1.02733  | -1.10054 | H          | 7.39169  | 1.46693  | -1.32613 |
| C | -0.51824 | 2.56733  | 0.33186  | H          | 7.16308  | 1.17556  | 0.39979  |
| C | -1.36952 | 3.47266  | -0.37464 | H          | -0.91002 | -2.50313 | 1.21571  |
| C | 2.38527  | -0.69187 | 2.24291  | H          | 4.50391  | -0.41932 | 2.45802  |
| O | -0.39410 | 0.56459  | 2.88284  | H          | 3.79361  | -1.62840 | 3.57375  |
| C | -1.63285 | 0.73966  | 3.00728  | H          | 3.55088  | 0.11931  | 3.84641  |
| O | -2.48825 | 0.30707  | 2.15822  | H          | -1.48850 | 1.41701  | 5.04352  |
| H | -1.86520 | -0.48296 | 1.33468  | H          | -3.17105 | 1.22875  | 4.44172  |
| C | -2.15395 | 1.53312  | 4.18498  | H          | -2.16975 | 2.59432  | 3.90838  |
| C | -2.95824 | 3.73443  | -2.21427 |            |          |          |          |
| H | -3.49136 | 4.46373  | -1.59092 | <b>18a</b> |          |          |          |
| C | 3.64106  | -0.66379 | 3.08536  | Ru         | -0.00840 | 0.47979  | 0.08197  |
| C | -2.11763 | 4.45345  | -3.27026 | O          | -0.57791 | 2.87244  | -0.04835 |
| H | -1.36163 | 5.09852  | -2.81303 | O          | 1.36008  | 1.99509  | 2.52809  |
| H | -1.60444 | 3.72061  | -3.90282 | O          | -0.31981 | 0.53060  | 2.16777  |
| H | -2.75690 | 5.07355  | -3.90883 | N          | 1.56357  | -2.04958 | 0.25627  |
| C | -3.97482 | 2.77612  | -2.82583 | N          | -0.58569 | -2.53206 | 0.18679  |
| H | -3.46803 | 2.01392  | -3.42781 | C          | 0.30850  | -1.49827 | 0.16068  |
| H | -4.54732 | 2.27181  | -2.04155 | C          | 1.52861  | -3.52426 | 0.18647  |
| H | -4.67089 | 3.32190  | -3.47190 | H          | 2.14370  | -3.97354 | 0.96733  |
| C | 0.26044  | 3.08159  | 1.39247  | H          | 1.90306  | -3.87041 | -0.78593 |
| C | -1.42123 | 4.82246  | -0.00818 | C          | 0.05256  | -3.84206 | 0.37971  |
| H | 0.92720  | 2.39873  | 1.90494  | H          | -0.33143 | -4.56904 | -0.34216 |
| H | -2.06601 | 5.51767  | -0.53232 | H          | -0.16442 | -4.22010 | 1.38683  |
| C | 0.20799  | 4.42544  | 1.74916  | C          | 2.88537  | -1.38933 | 0.05116  |

|   |          |          |          |           |          |          |          |
|---|----------|----------|----------|-----------|----------|----------|----------|
| C | 3.27727  | -1.39103 | -1.45001 | C         | -3.93354 | 1.69058  | -0.78960 |
| H | 2.51848  | -0.83466 | -2.00855 | H         | -4.41293 | 0.72737  | -0.94265 |
| H | 3.29473  | -2.42091 | -1.83305 | C         | -4.66489 | 2.86983  | -0.88474 |
| C | 4.66873  | -0.74624 | -1.63717 | H         | -5.72796 | 2.84296  | -1.10429 |
| H | 4.92479  | -0.75806 | -2.70478 | C         | -4.01150 | 4.09080  | -0.70323 |
| C | 5.72458  | -1.53848 | -0.84045 | H         | -4.56759 | 5.02149  | -0.77955 |
| H | 5.77639  | -2.57479 | -1.20363 | C         | -2.64321 | 4.14618  | -0.42048 |
| H | 6.72022  | -1.09887 | -0.98970 | H         | -2.17119 | 5.10989  | -0.27997 |
| C | 5.35849  | -1.51879 | 0.65802  | C         | -1.91700 | 2.95726  | -0.31379 |
| H | 6.09531  | -2.10107 | 1.22690  | C         | 0.23283  | 4.09330  | -0.03267 |
| C | 3.97053  | -2.16517 | 0.84882  | H         | -0.16222 | 4.73100  | -0.83227 |
| H | 3.69814  | -2.18485 | 1.91297  | C         | 1.65822  | 3.68640  | -0.37278 |
| H | 4.03014  | -3.20437 | 0.50599  | H         | 2.06417  | 3.07063  | 0.43377  |
| C | 5.32968  | -0.06700 | 1.16765  | H         | 2.27549  | 4.58640  | -0.47587 |
| H | 5.09314  | -0.04321 | 2.23990  | H         | 1.68603  | 3.12511  | -1.31090 |
| H | 6.31714  | 0.39883  | 1.04549  | C         | 0.12908  | 4.78617  | 1.32405  |
| C | 4.26966  | 0.71525  | 0.37284  | H         | -0.90599 | 5.02513  | 1.58647  |
| H | 4.21298  | 1.74572  | 0.74209  | H         | 0.69729  | 5.72369  | 1.29812  |
| C | 2.88513  | 0.05897  | 0.57278  | H         | 0.55157  | 4.13812  | 2.09628  |
| H | 2.59855  | 0.09340  | 1.62614  | C         | 0.39451  | 1.31957  | 2.91139  |
| C | 4.63003  | 0.70887  | -1.12712 | C         | -0.06695 | 1.37304  | 4.36610  |
| H | 3.88836  | 1.28499  | -1.69478 | H         | 2.17822  | 0.68029  | 0.00550  |
| H | 5.60542  | 1.19050  | -1.28219 | O         | 0.71338  | 0.67793  | -1.86403 |
| C | -2.02344 | -2.54535 | 0.23710  | C         | -0.01484 | 0.56053  | -2.93956 |
| C | -2.73240 | -2.80953 | -0.95169 | O         | -1.21360 | 0.27009  | -2.97665 |
| C | -4.12637 | -2.90991 | -0.88325 | C         | 0.76633  | 0.79790  | -4.22997 |
| H | -4.68117 | -3.09942 | -1.79982 | H         | -1.02261 | 1.90745  | 4.42649  |
| C | -4.82014 | -2.77123 | 0.32308  | H         | 0.67195  | 1.89318  | 4.97933  |
| C | -4.08093 | -2.53433 | 1.48602  | H         | -0.23481 | 0.36432  | 4.75689  |
| H | -4.60197 | -2.43329 | 2.43590  | H         | 1.43294  | 1.65953  | -4.12851 |
| C | -2.68508 | -2.43220 | 1.47497  | H         | 1.39192  | -0.07748 | -4.44388 |
| C | -2.03132 | -2.92321 | -2.28474 | H         | 0.07913  | 0.94938  | -5.06482 |
| H | -1.17613 | -3.60791 | -2.24690 |           |          |          |          |
| H | -1.65799 | -1.94529 | -2.61240 |           |          |          |          |
| H | -2.72210 | -3.29417 | -3.04838 | <b>19</b> |          |          |          |
| C | -6.32377 | -2.91596 | 0.37544  | Ru        | 0.52067  | 0.56825  | -0.37274 |
| H | -6.75867 | -2.29877 | 1.16889  | O         | 1.42454  | 2.74915  | 0.19631  |
| H | -6.61530 | -3.95583 | 0.57618  | O         | 1.52466  | -0.67504 | 1.43930  |
| H | -6.78803 | -2.62676 | -0.57339 | O         | -0.38436 | 0.39145  | 1.72660  |
| C | -1.93402 | -2.19638 | 2.76315  | N         | -1.58843 | -1.35106 | -1.54749 |
| H | -1.19667 | -2.98714 | 2.95361  | N         | 0.52011  | -2.06628 | -1.59752 |
| H | -2.62786 | -2.18669 | 3.60985  | C         | -0.29509 | -1.05106 | -1.15551 |
| H | -1.39497 | -1.24283 | 2.74103  | C         | -1.60697 | -2.64933 | -2.26466 |
| C | -1.79364 | 0.47948  | -0.41923 | H         | -2.25225 | -2.60678 | -3.14381 |
| H | -2.36866 | -0.41131 | -0.64718 | H         | -1.96710 | -3.45116 | -1.60579 |
| C | -2.55564 | 1.70842  | -0.50379 | C         | -0.14683 | -2.86746 | -2.62656 |
|   |          |          |          | H         | 0.14504  | -3.91739 | -2.59684 |



|   |          |          |          |           |          |          |          |
|---|----------|----------|----------|-----------|----------|----------|----------|
| H | 0.09591  | -2.46918 | -3.62273 | C         | -0.20068 | 3.16646  | -1.43708 |
| C | -2.83476 | -1.04714 | -0.74662 | C         | -0.92386 | 4.06663  | -2.24274 |
| C | -2.78641 | -1.82059 | 0.59714  | H         | -1.63149 | 3.65868  | -2.96061 |
| H | -1.92216 | -1.46877 | 1.16802  | C         | -0.75493 | 5.44362  | -2.12725 |
| H | -2.65360 | -2.89546 | 0.41085  | H         | -1.32476 | 6.12264  | -2.75466 |
| C | -4.08206 | -1.58869 | 1.40356  | C         | 0.15018  | 5.94181  | -1.18859 |
| H | -4.02217 | -2.15285 | 2.34385  | H         | 0.28645  | 7.01429  | -1.07851 |
| C | -5.29600 | -2.07022 | 0.58531  | C         | 0.89426  | 5.07991  | -0.37552 |
| H | -5.21049 | -3.14583 | 0.37451  | H         | 1.58083  | 5.50193  | 0.34772  |
| H | -6.22139 | -1.93049 | 1.16062  | C         | 0.73014  | 3.70004  | -0.50845 |
| C | -5.37345 | -1.27429 | -0.73440 | C         | 2.37695  | 3.14725  | 1.23058  |
| H | -6.22672 | -1.62686 | -1.32910 | H         | 2.86453  | 4.06355  | 0.88199  |
| C | -4.08170 | -1.50801 | -1.54953 | C         | 3.42926  | 2.05180  | 1.32718  |
| H | -4.12642 | -0.96058 | -2.50141 | H         | 2.98782  | 1.08869  | 1.59651  |
| H | -4.02511 | -2.57486 | -1.79023 | H         | 4.16678  | 2.33175  | 2.08833  |
| C | -5.53381 | 0.22413  | -0.42387 | H         | 3.95026  | 1.93551  | 0.37182  |
| H | -5.62175 | 0.79801  | -1.35701 | C         | 1.62319  | 3.40414  | 2.53233  |
| H | -6.45672 | 0.39585  | 0.14717  | H         | 0.90202  | 4.22035  | 2.42073  |
| C | -4.30793 | 0.69388  | 0.37799  | H         | 2.32649  | 3.67425  | 3.32817  |
| H | -4.38742 | 1.76890  | 0.58538  | H         | 1.07378  | 2.50648  | 2.83004  |
| C | -3.02064 | 0.45546  | -0.44301 | C         | 0.55284  | -0.35159 | 2.17807  |
| H | -3.07591 | 1.01141  | -1.38693 | C         | 0.49536  | -0.87993 | 3.62593  |
| C | -4.22416 | -0.08377 | 1.70610  | C         | 0.29558  | -2.41078 | 3.55240  |
| H | -3.36197 | 0.26523  | 2.28734  | H         | 1.09827  | -2.87670 | 2.97307  |
| H | -5.12487 | 0.09855  | 2.30878  | H         | -0.66097 | -2.66432 | 3.07926  |
| C | 1.93865  | -2.13383 | -1.40407 | H         | 0.29488  | -2.84249 | 4.56111  |
| C | 2.53601  | -3.34203 | -1.00881 | C         | 1.84299  | -0.57999 | 4.31435  |
| C | 3.92626  | -3.36431 | -0.82691 | H         | 2.67203  | -1.01313 | 3.74834  |
| H | 4.39457  | -4.29757 | -0.52002 | H         | 1.85218  | -0.99840 | 5.32843  |
| C | 4.71601  | -2.22526 | -0.98832 | H         | 2.01438  | 0.50032  | 4.39798  |
| C | 4.08085  | -1.02795 | -1.33610 | C         | -0.65507 | -0.23632 | 4.41495  |
| H | 4.67122  | -0.12049 | -1.45017 | H         | -0.67201 | -0.62709 | 5.44028  |
| C | 2.70220  | -0.95801 | -1.55367 | H         | -1.62395 | -0.44614 | 3.95244  |
| C | 1.73942  | -4.59274 | -0.71448 | H         | -0.54451 | 0.85199  | 4.46716  |
| H | 2.28186  | -5.22912 | -0.00815 | H         | -2.16454 | 0.83181  | 0.11592  |
| H | 1.55600  | -5.20073 | -1.61183 |           |          |          |          |
| H | 0.76697  | -4.35234 | -0.27143 | <b>S1</b> |          |          |          |
| C | 6.21357  | -2.27784 | -0.78984 | Ru        | 0.05166  | -0.03195 | -0.99224 |
| H | 6.74908  | -2.18367 | -1.74414 | O         | -0.23272 | 2.21710  | -1.89029 |
| H | 6.52362  | -3.22253 | -0.33093 | N         | -0.75511 | -2.49912 | 0.28883  |
| H | 6.56102  | -1.46135 | -0.14550 | N         | 1.42860  | -2.36187 | 0.49535  |
| C | 2.00042  | 0.31337  | -1.88012 | C         | 0.32906  | -1.73964 | -0.00204 |
| H | 1.53137  | 0.25411  | -2.86905 | C         | -0.42871 | -3.61060 | 1.19427  |
| H | 2.68812  | 1.16710  | -1.88133 | H         | -0.92037 | -4.53784 | 0.88620  |
| C | -0.39004 | 1.72707  | -1.50921 | H         | -0.74375 | -3.36369 | 2.21418  |
| H | -1.08553 | 1.42220  | -2.30107 | C         | 1.09622  | -3.67769 | 1.07502  |

|   |          |          |          |           |          |          |          |
|---|----------|----------|----------|-----------|----------|----------|----------|
| H | 1.59283  | -3.81079 | 2.03941  | H         | -2.79332 | 3.97286  | -3.26146 |
| H | 1.42896  | -4.47635 | 0.39949  | H         | -1.88749 | 4.36668  | -1.78678 |
| C | -2.14009 | -2.07760 | 0.03906  | C         | -1.45699 | 1.58801  | -3.86908 |
| C | -2.96356 | -2.06795 | 1.35337  | H         | -0.59005 | 1.00819  | -4.19463 |
| H | -2.47433 | -1.41415 | 2.08067  | H         | -1.97947 | 1.97759  | -4.75008 |
| H | -2.98157 | -3.08184 | 1.77600  | H         | -2.14564 | 0.92528  | -3.33527 |
| C | -2.82042 | -3.05709 | -0.95788 | H         | -1.71478 | 0.28662  | 0.31900  |
| H | -2.23231 | -3.09559 | -1.88440 | O         | -1.81595 | 1.25635  | 1.24287  |
| H | -2.82947 | -4.07311 | -0.53812 | C         | -1.25541 | 1.00896  | 2.38703  |
| C | -2.12309 | -0.67204 | -0.60098 | O         | -0.72587 | -0.07025 | 2.70215  |
| C | 2.80951  | -1.96883 | 0.42364  | C         | -1.30871 | 2.15616  | 3.43381  |
| C | 3.38033  | -1.30210 | 1.52633  | C         | -3.59008 | -0.20098 | -0.83231 |
| C | 4.72926  | -0.93672 | 1.45082  | C         | -4.41336 | -1.62303 | 1.06845  |
| H | 5.17409  | -0.40705 | 2.29107  | C         | -4.26693 | -2.59983 | -1.24401 |
| C | 5.51954  | -1.24334 | 0.33957  | H         | -4.72567 | -3.29322 | -1.96119 |
| C | 4.93893  | -1.97598 | -0.69975 | C         | -5.06948 | -2.60080 | 0.07286  |
| H | 5.54700  | -2.25905 | -1.55638 | H         | -6.10944 | -2.30403 | -0.12013 |
| C | 3.59587  | -2.36425 | -0.67578 | H         | -5.09916 | -3.61490 | 0.49577  |
| C | 2.60540  | -1.03861 | 2.79980  | H         | -4.97340 | -1.62618 | 2.01260  |
| H | 2.59177  | -1.93824 | 3.43227  | C         | -4.40954 | -0.20319 | 0.47329  |
| H | 1.56227  | -0.75274 | 2.63692  | C         | -4.25644 | -1.17476 | -1.83573 |
| H | 3.08937  | -0.25103 | 3.38692  | H         | -5.28493 | -0.84835 | -2.04336 |
| C | 6.96000  | -0.79383 | 0.26078  | H         | -3.71891 | -1.16726 | -2.79484 |
| H | 7.04721  | 0.15527  | -0.28474 | H         | -3.57227 | 0.81119  | -1.25292 |
| H | 7.58149  | -1.52657 | -0.26567 | H         | -5.43855 | 0.11403  | 0.25284  |
| H | 7.38758  | -0.63838 | 1.25706  | H         | -3.98507 | 0.51291  | 1.18024  |
| C | 3.05129  | -3.24940 | -1.77182 | C         | 0.09545  | 2.33045  | 4.04453  |
| H | 3.02553  | -4.29901 | -1.44541 | H         | 0.81101  | 2.68063  | 3.29034  |
| H | 3.68950  | -3.19963 | -2.65863 | H         | 0.07355  | 3.07173  | 4.85353  |
| H | 2.04554  | -2.95627 | -2.07527 | H         | 0.45920  | 1.38095  | 4.44635  |
| C | 1.15371  | 0.99271  | 0.07934  | C         | -2.28943 | 1.70378  | 4.53880  |
| H | 1.68662  | 0.58827  | 0.93800  | H         | -2.33428 | 2.44991  | 5.34232  |
| C | 1.35566  | 2.39812  | -0.17866 | H         | -3.30413 | 1.57901  | 4.14039  |
| C | 2.27703  | 3.15890  | 0.56866  | H         | -1.96988 | 0.74857  | 4.96715  |
| H | 2.82279  | 2.66604  | 1.36875  | C         | -1.78523 | 3.48172  | 2.82068  |
| C | 2.49993  | 4.50199  | 0.28540  | H         | -1.81952 | 4.26345  | 3.59105  |
| H | 3.21528  | 5.07534  | 0.86697  | H         | -1.11005 | 3.81614  | 2.02584  |
| C | 1.79281  | 5.10419  | -0.75763 | H         | -2.78381 | 3.38210  | 2.38564  |
| H | 1.95528  | 6.15298  | -0.99054 | H         | -1.75804 | -0.80012 | -1.65231 |
| C | 0.86549  | 4.38207  | -1.51555 | Cl        | 1.48853  | -0.41288 | -2.84688 |
| H | 0.33036  | 4.88548  | -2.31045 |           |          |          |          |
| C | 0.64611  | 3.03371  | -1.22806 | <b>S2</b> |          |          |          |
| C | -1.03025 | 2.75486  | -2.99067 | Ru        | 0.09259  | 0.50484  | 0.13689  |
| H | -0.36626 | 3.40118  | -3.57485 | O         | -1.01323 | 2.44253  | 1.34368  |
| C | -2.21108 | 3.54846  | -2.43569 | N         | -0.01275 | -1.43841 | -2.00491 |
| H | -2.86427 | 2.89406  | -1.85014 | N         | 2.10809  | -1.07526 | -1.54472 |

|   |          |          |          |    |          |          |          |
|---|----------|----------|----------|----|----------|----------|----------|
| C | 0.83310  | -0.75416 | -1.19142 | C  | -2.29160 | -2.00147 | 4.30906  |
| C | 0.68949  | -2.19454 | -3.05182 | H  | -3.24989 | -1.84406 | 3.80691  |
| H | 0.54477  | -1.72122 | -4.03078 | H  | -2.43910 | -2.71919 | 5.12470  |
| H | 0.32324  | -3.22317 | -3.11838 | H  | -1.97788 | -1.05021 | 4.75402  |
| C | 2.14771  | -2.11603 | -2.59021 | C  | -1.70691 | -3.88733 | 2.74162  |
| H | 2.50630  | -3.06187 | -2.16547 | H  | -0.97710 | -4.28973 | 2.02915  |
| H | 2.83500  | -1.82633 | -3.39071 | H  | -1.82928 | -4.62039 | 3.54772  |
| C | -1.48594 | -1.37434 | -1.95591 | H  | -2.66762 | -3.77814 | 2.22843  |
| C | -2.05594 | -2.76277 | -1.56255 | C  | 3.36697  | -0.76135 | -0.91940 |
| H | -1.68427 | -3.03649 | -0.56802 | C  | 4.16746  | 0.25087  | -1.47253 |
| H | -1.69856 | -3.52933 | -2.26416 | C  | 3.83453  | -1.56598 | 0.13572  |
| C | -3.59980 | -2.74003 | -1.57283 | C  | 5.44455  | 0.45524  | -0.94140 |
| H | -3.97254 | -3.73987 | -1.31272 | C  | 5.11744  | -1.32338 | 0.63202  |
| C | -4.11064 | -2.34536 | -2.97189 | C  | 5.93599  | -0.31536 | 0.11435  |
| H | -3.78122 | -3.07638 | -3.72428 | H  | 6.06799  | 1.24093  | -1.36382 |
| H | -5.20900 | -2.34795 | -2.98282 | H  | 5.48392  | -1.93644 | 1.45289  |
| C | -3.57774 | -0.94272 | -3.32847 | C  | 2.97350  | -2.63710 | 0.75877  |
| H | -3.94458 | -0.64855 | -4.32105 | H  | 2.12341  | -2.18925 | 1.28438  |
| C | -2.03682 | -0.99714 | -3.36028 | H  | 2.56763  | -3.33551 | 0.01611  |
| H | -1.61850 | -0.02594 | -3.65861 | H  | 3.55390  | -3.22308 | 1.47876  |
| H | -1.72480 | -1.73141 | -4.11674 | C  | 7.30501  | -0.05218 | 0.69737  |
| C | -4.05239 | 0.08028  | -2.27499 | H  | 7.98051  | 0.38765  | -0.04454 |
| H | -3.70439 | 1.08755  | -2.54148 | H  | 7.24519  | 0.64910  | 1.54027  |
| H | -5.15150 | 0.11373  | -2.26071 | H  | 7.76595  | -0.97234 | 1.07336  |
| C | -3.51413 | -0.32270 | -0.88014 | C  | 3.67055  | 1.14030  | -2.58654 |
| H | -3.85051 | 0.40945  | -0.13535 | H  | 4.50562  | 1.64652  | -3.08125 |
| C | -1.94134 | -0.29489 | -0.94519 | H  | 3.10845  | 0.58826  | -3.34773 |
| H | -1.76658 | 0.66676  | -1.42719 | H  | 3.00246  | 1.91314  | -2.18744 |
| C | -4.09877 | -1.71183 | -0.54164 | C  | -0.62183 | 1.80643  | 3.64086  |
| H | -3.82298 | -2.01841 | 0.46843  | H  | -0.74406 | 0.73922  | 3.44806  |
| H | -5.19654 | -1.65745 | -0.57497 | H  | 0.43382  | 2.04959  | 3.50310  |
| C | 0.21518  | 1.95270  | -1.04167 | H  | -0.91433 | 2.00980  | 4.67796  |
| H | 0.71771  | 1.90648  | -2.01629 | C  | -2.97537 | 2.27440  | 2.77516  |
| C | -0.35689 | 3.24884  | -0.76536 | H  | -3.35741 | 2.43503  | 3.78992  |
| C | -1.02527 | 3.48809  | 0.46772  | H  | -3.56884 | 2.88455  | 2.08592  |
| O | 0.05221  | -1.21936 | 1.73438  | H  | -3.11155 | 1.22002  | 2.51489  |
| C | -1.06680 | -1.55908 | 2.15504  | C  | -0.30689 | 4.29388  | -1.71267 |
| O | -2.16283 | -1.12408 | 1.60617  | C  | -1.64250 | 4.72106  | 0.70356  |
| H | -1.88876 | -0.65765 | 0.56292  | C  | -1.57639 | 5.72636  | -0.26452 |
| C | -1.22857 | -2.53826 | 3.32850  | C  | -0.90553 | 5.52444  | -1.47365 |
| C | -1.49445 | 2.63639  | 2.71231  | H  | -2.18670 | 4.91163  | 1.61979  |
| H | -1.34179 | 3.69171  | 2.95640  | H  | -2.06193 | 6.67785  | -0.06457 |
| C | 0.11532  | -2.72666 | 4.04989  | H  | -0.85834 | 6.31561  | -2.21576 |
| H | -0.01138 | -3.41241 | 4.89609  | H  | 0.21409  | 4.10987  | -2.64926 |
| H | 0.87318  | -3.14126 | 3.37955  | Cl | 2.07901  | 1.14570  | 1.37307  |
| H | 0.49957  | -1.77526 | 4.43106  |    |          |          |          |

**Part 3. NMR Spectra:**  $^1\text{H}$  NMR (500 MHz,  $\text{C}_6\text{D}_6$ ) spectrum of compound **7a**.

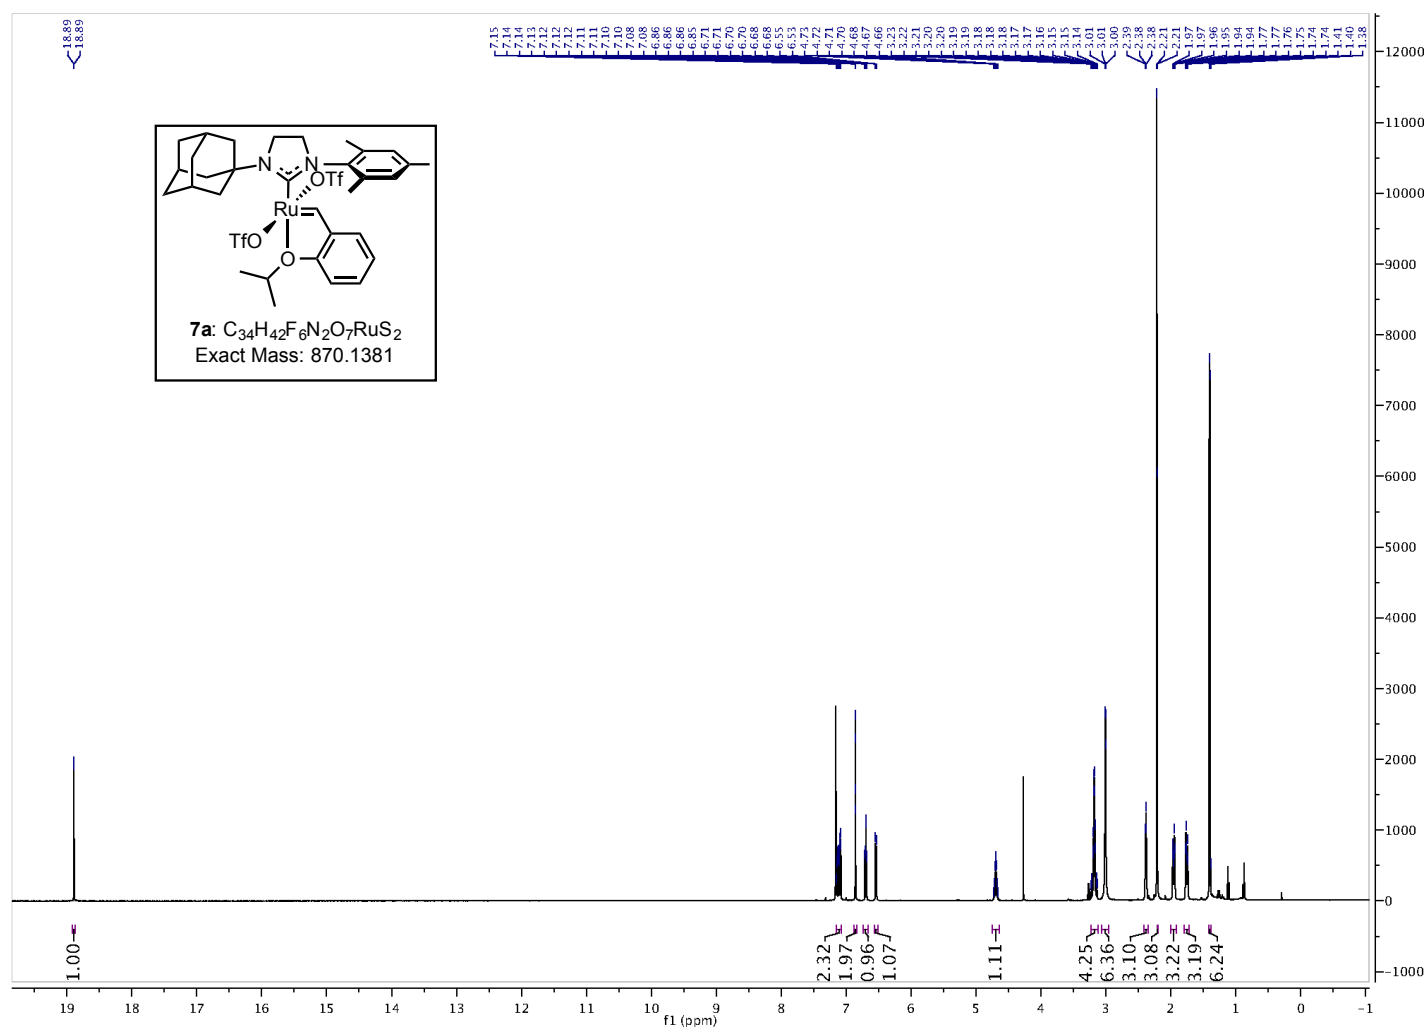

$^{13}\text{C}$  NMR (126 MHz,  $\text{C}_6\text{D}_6$ ) spectrum of compound **7a**.

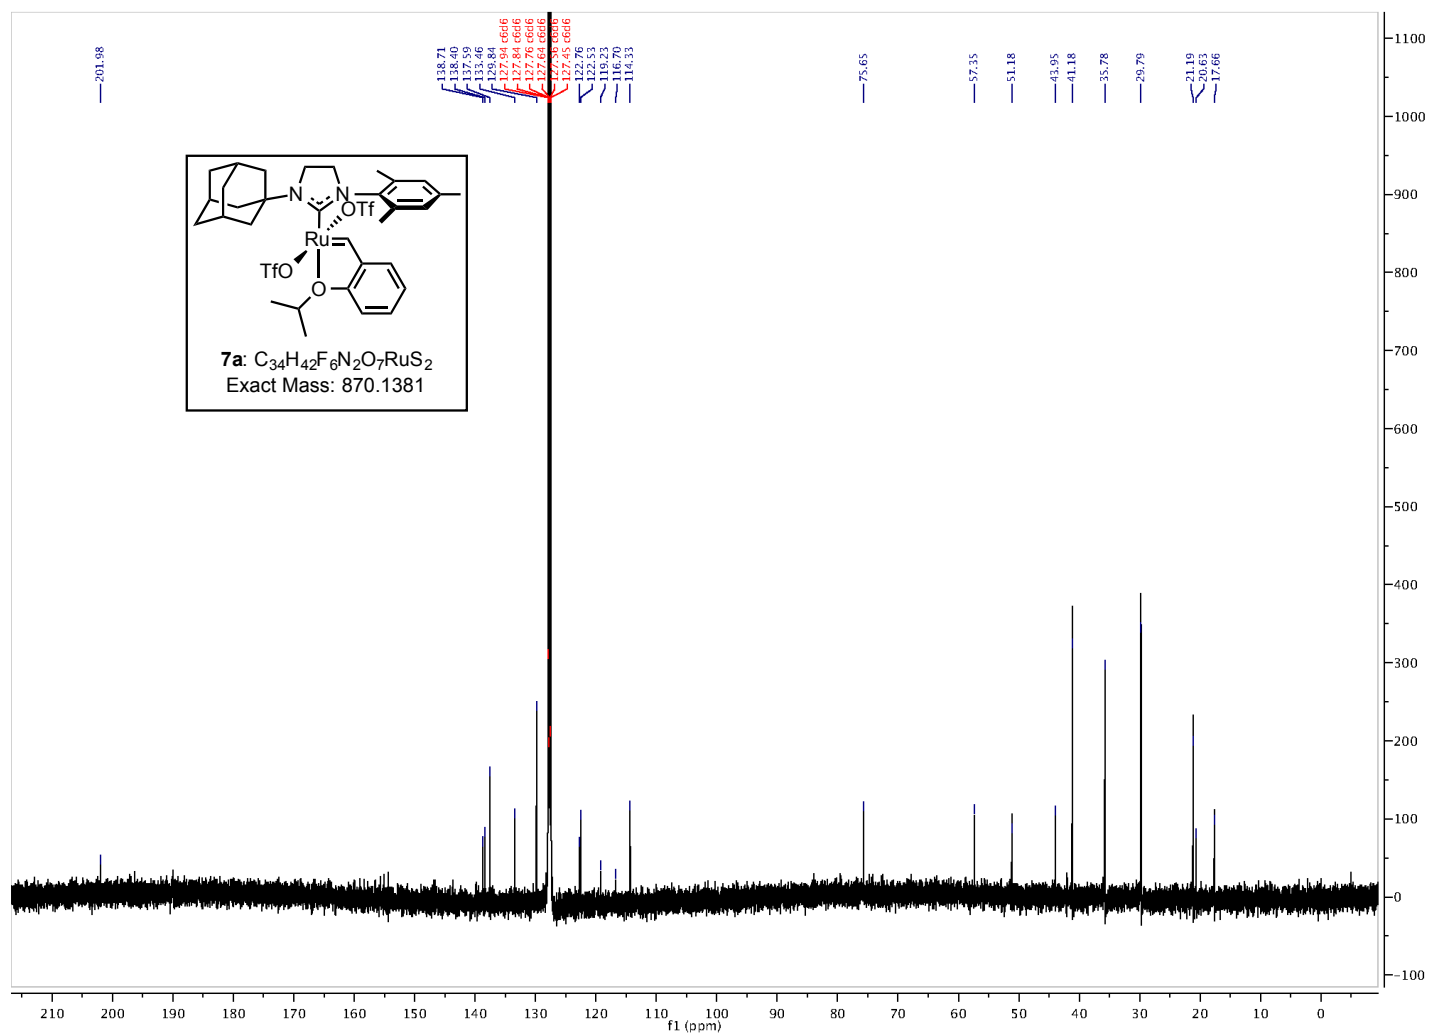

$^1\text{H}$  NMR (400 MHz,  $\text{C}_6\text{D}_6$ ) spectrum of compound **S4**.

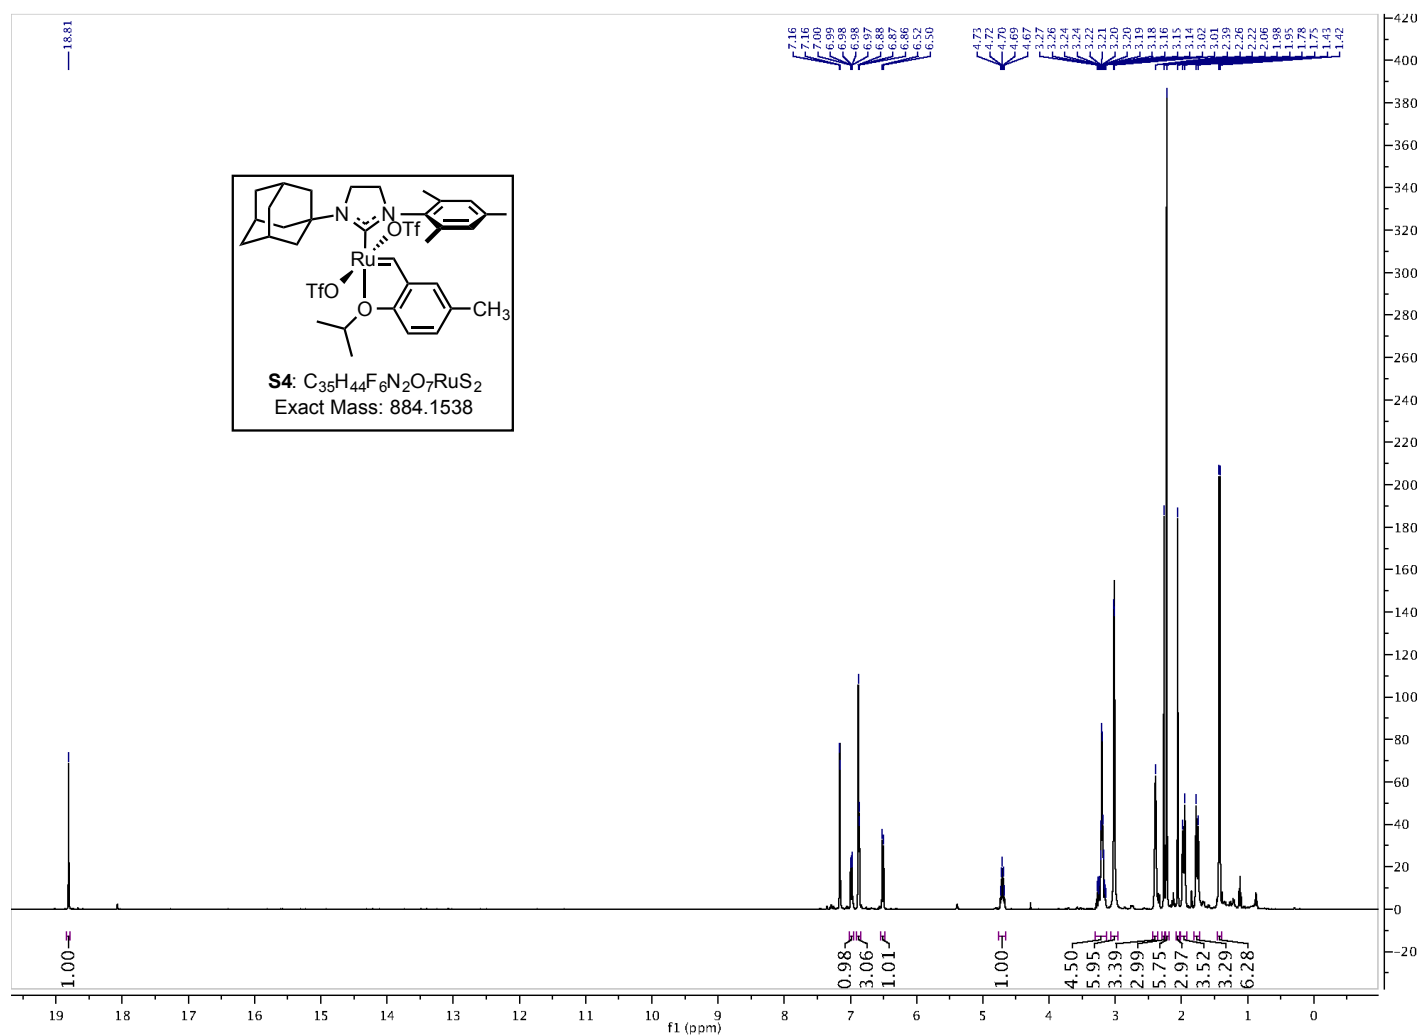

$^{13}\text{C}$  NMR (101 MHz,  $\text{C}_6\text{D}_6$ ) spectrum of compound **S4**.

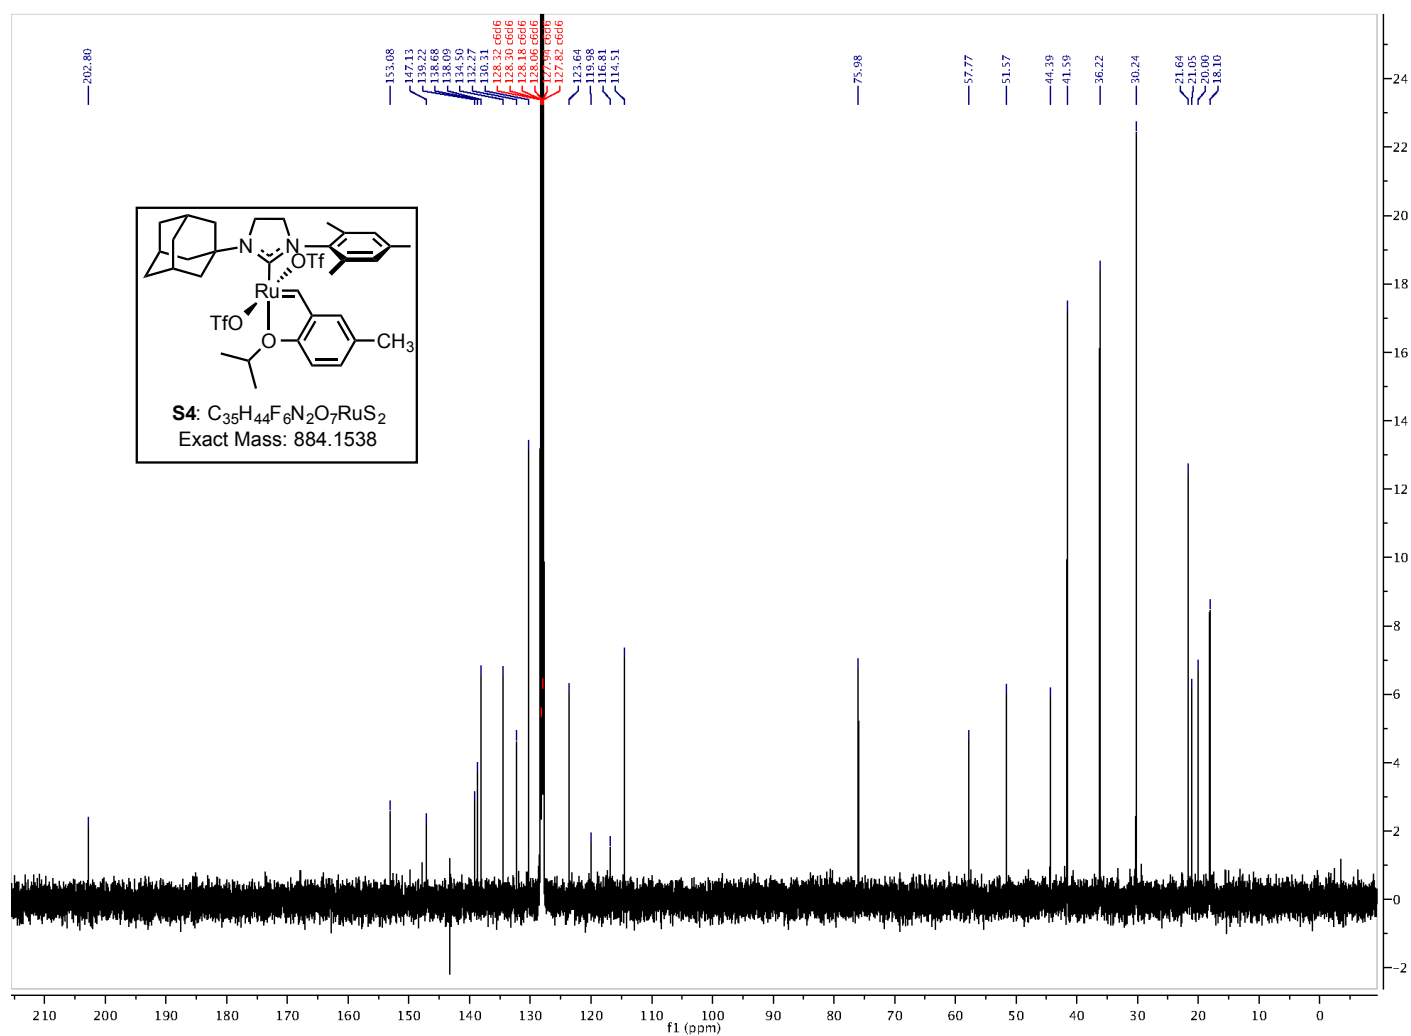

$^1\text{H}$  NMR (400 MHz,  $\text{C}_6\text{D}_6$ ) spectrum of compound **S5**.

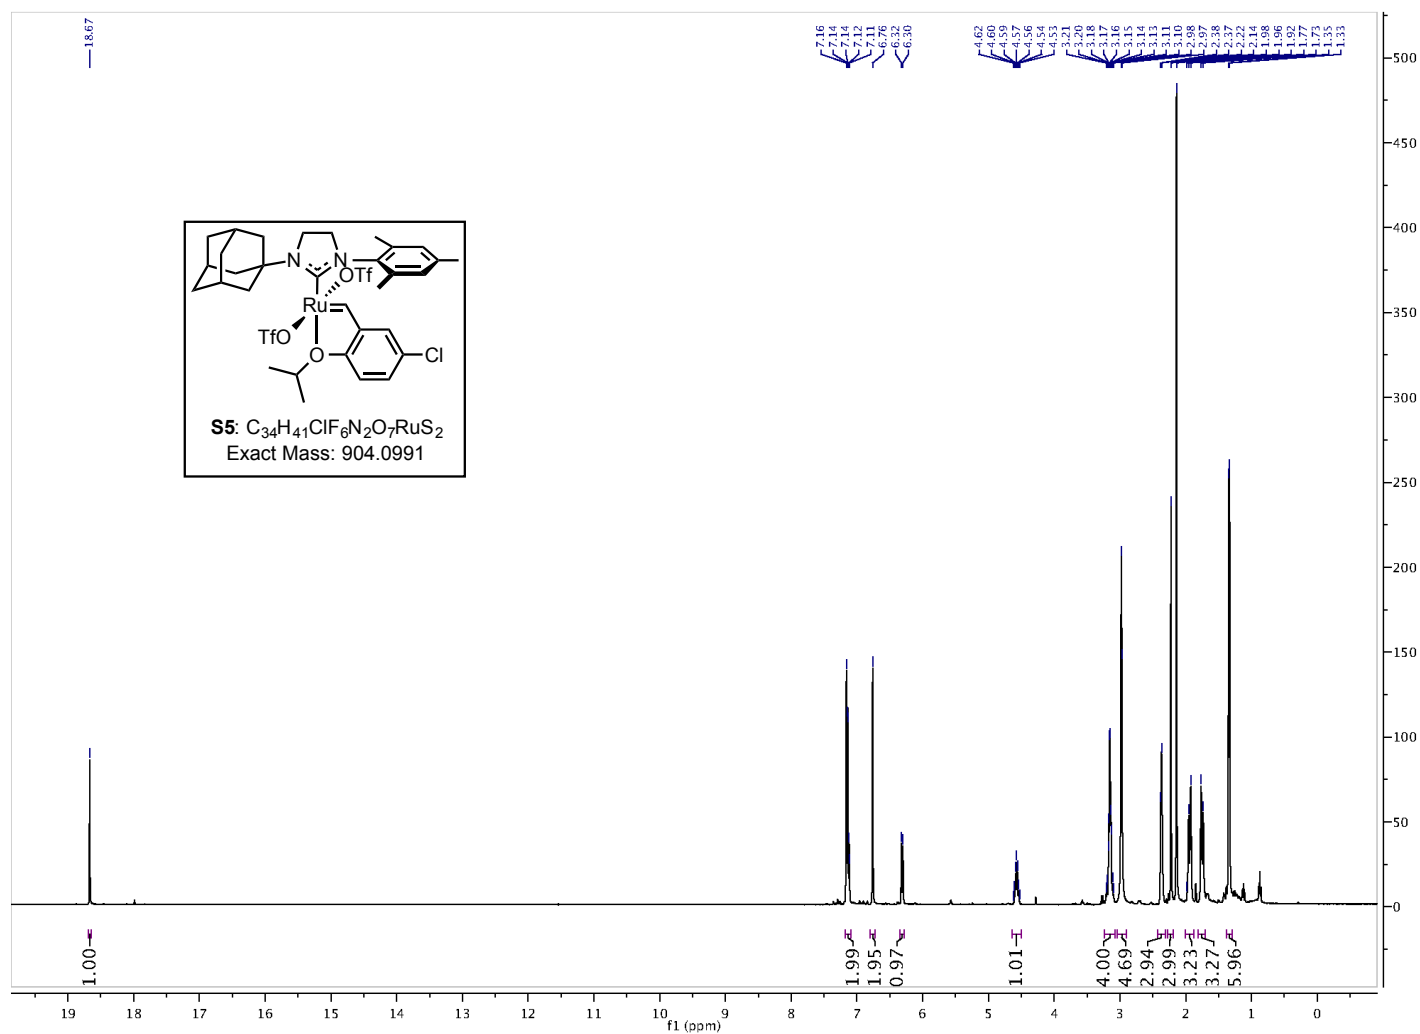



$^{13}\text{C}$  NMR (101 MHz,  $\text{C}_6\text{D}_6$ ) spectrum of compound **S5**.

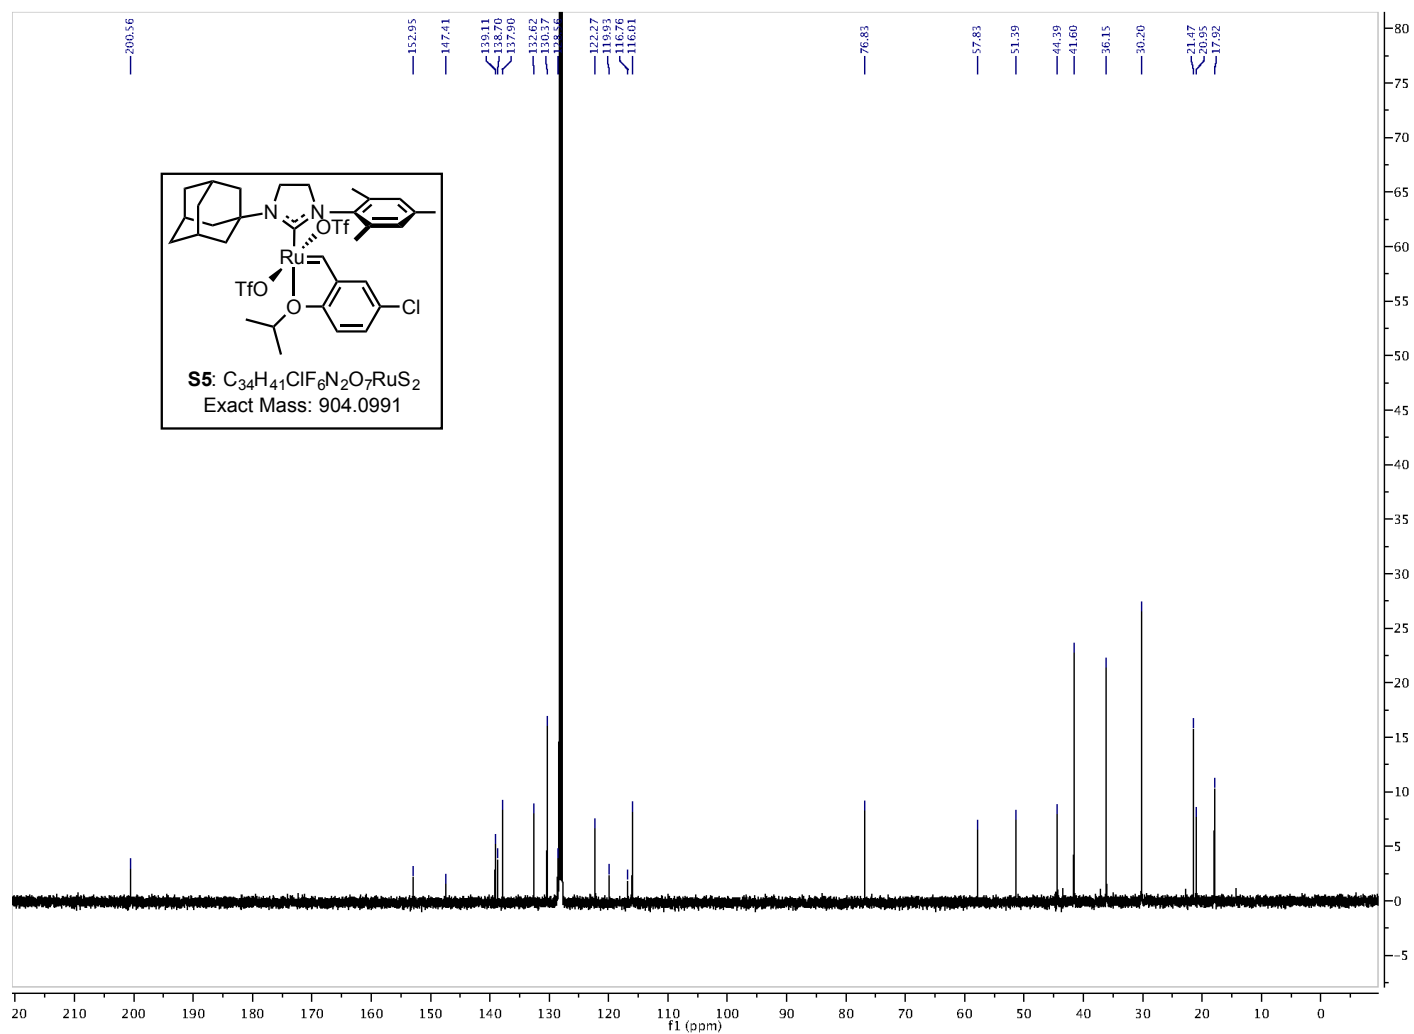

$^1\text{H}$  NMR (500 MHz,  $\text{C}_6\text{D}_6$ ) spectrum of compound **S6**.

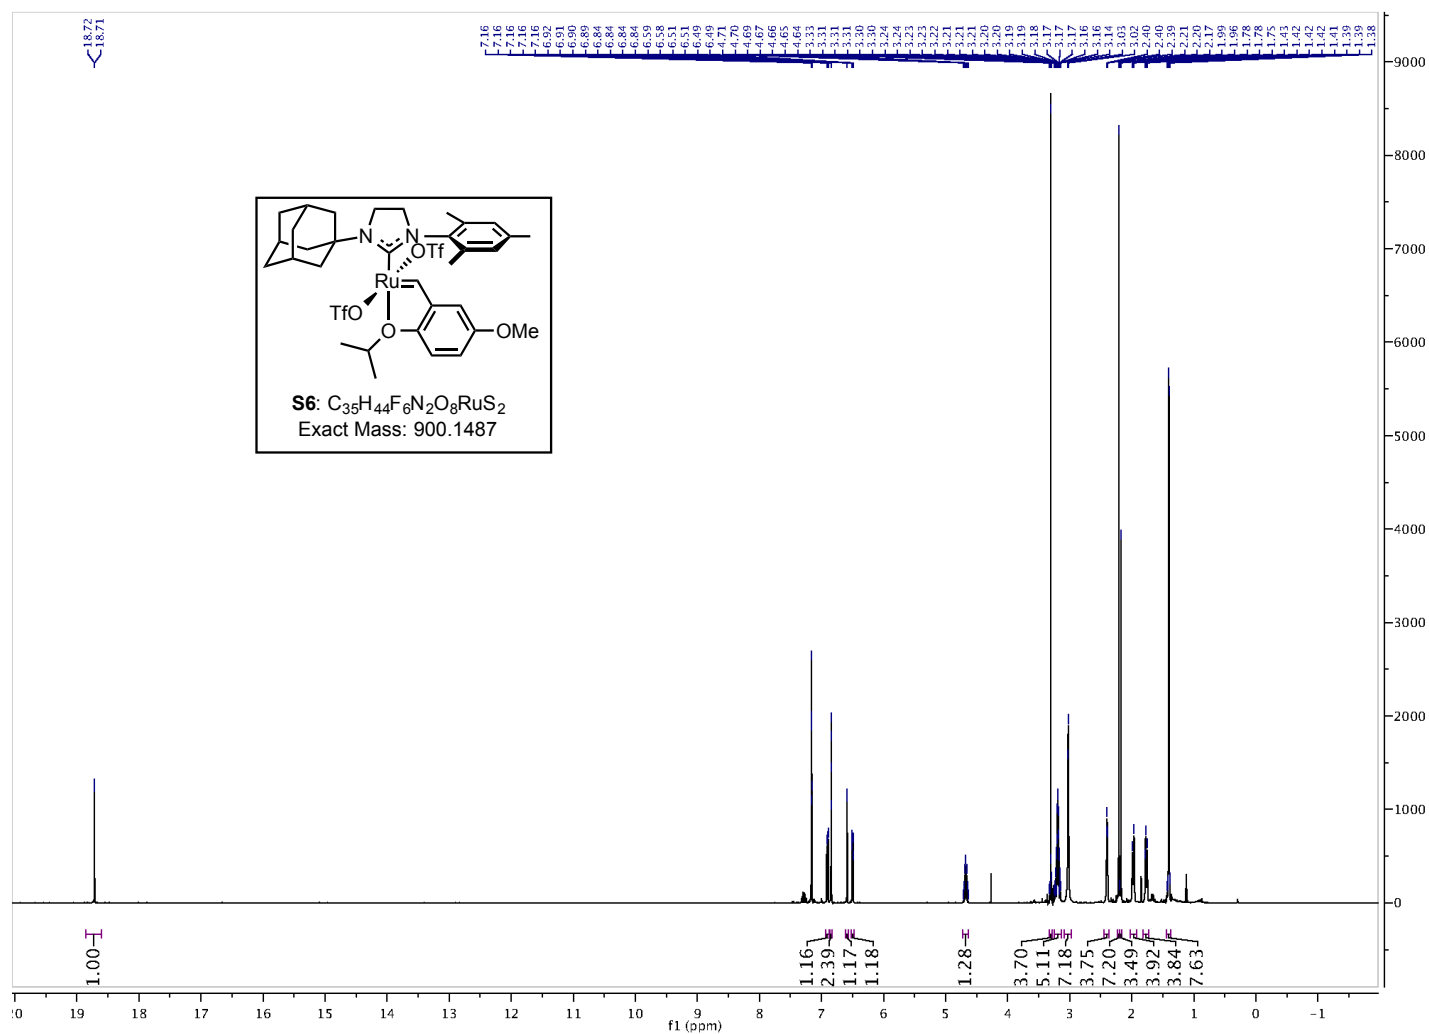

$^{13}\text{C}$  NMR (126 MHz,  $\text{C}_6\text{D}_6$ ) spectrum of compound **S6**.

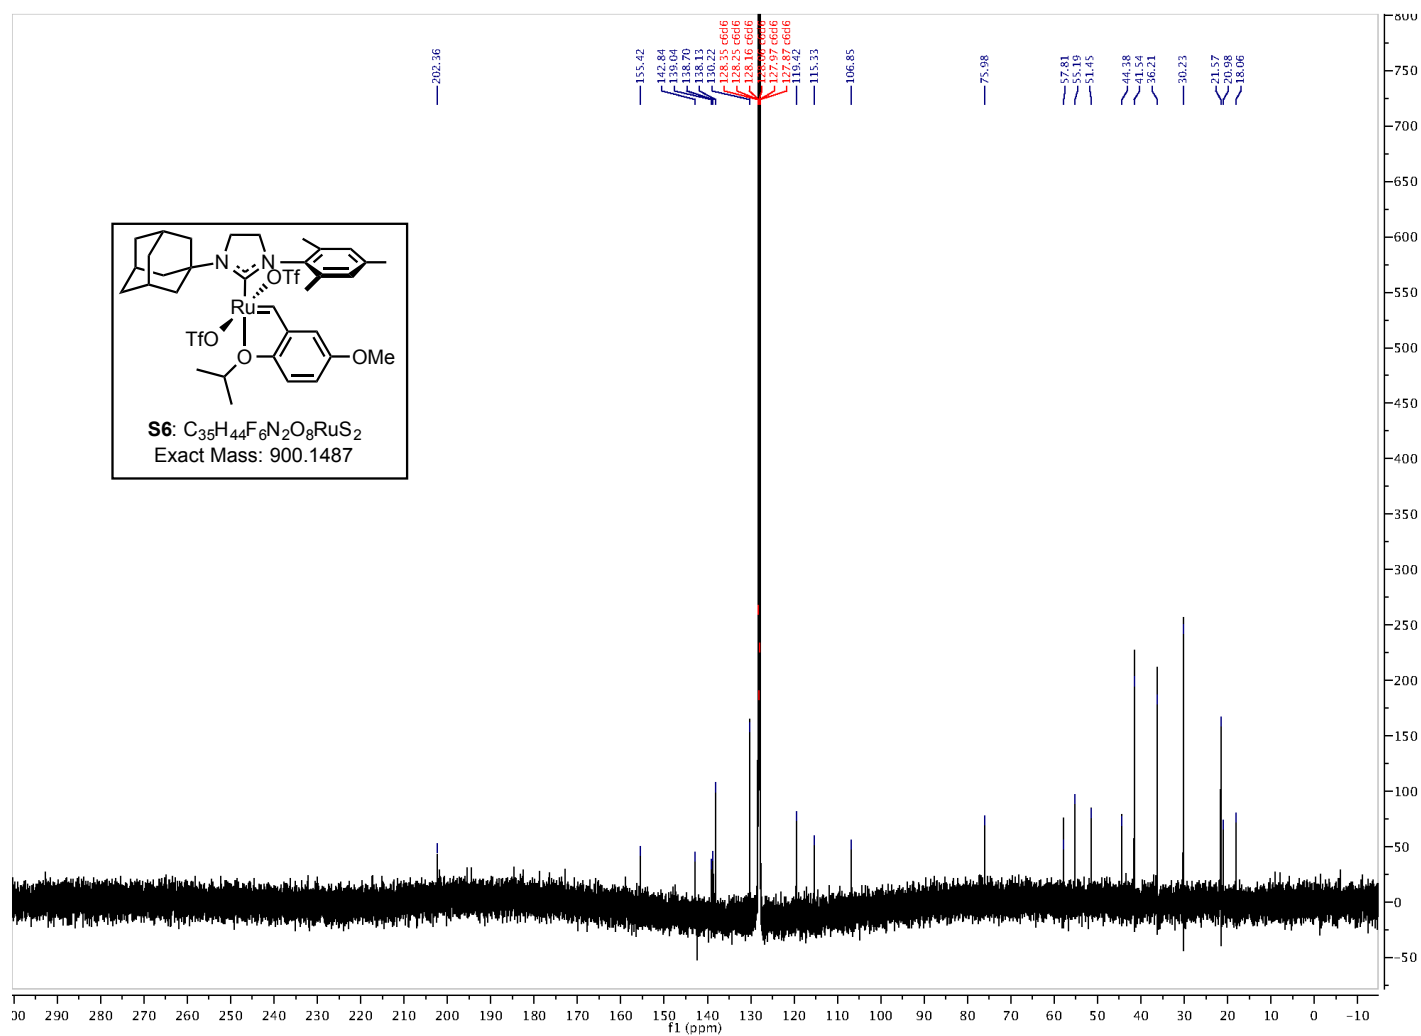

$^1\text{H}$  NMR (500 MHz,  $\text{C}_6\text{D}_6$ ) spectrum of compound **7d**.

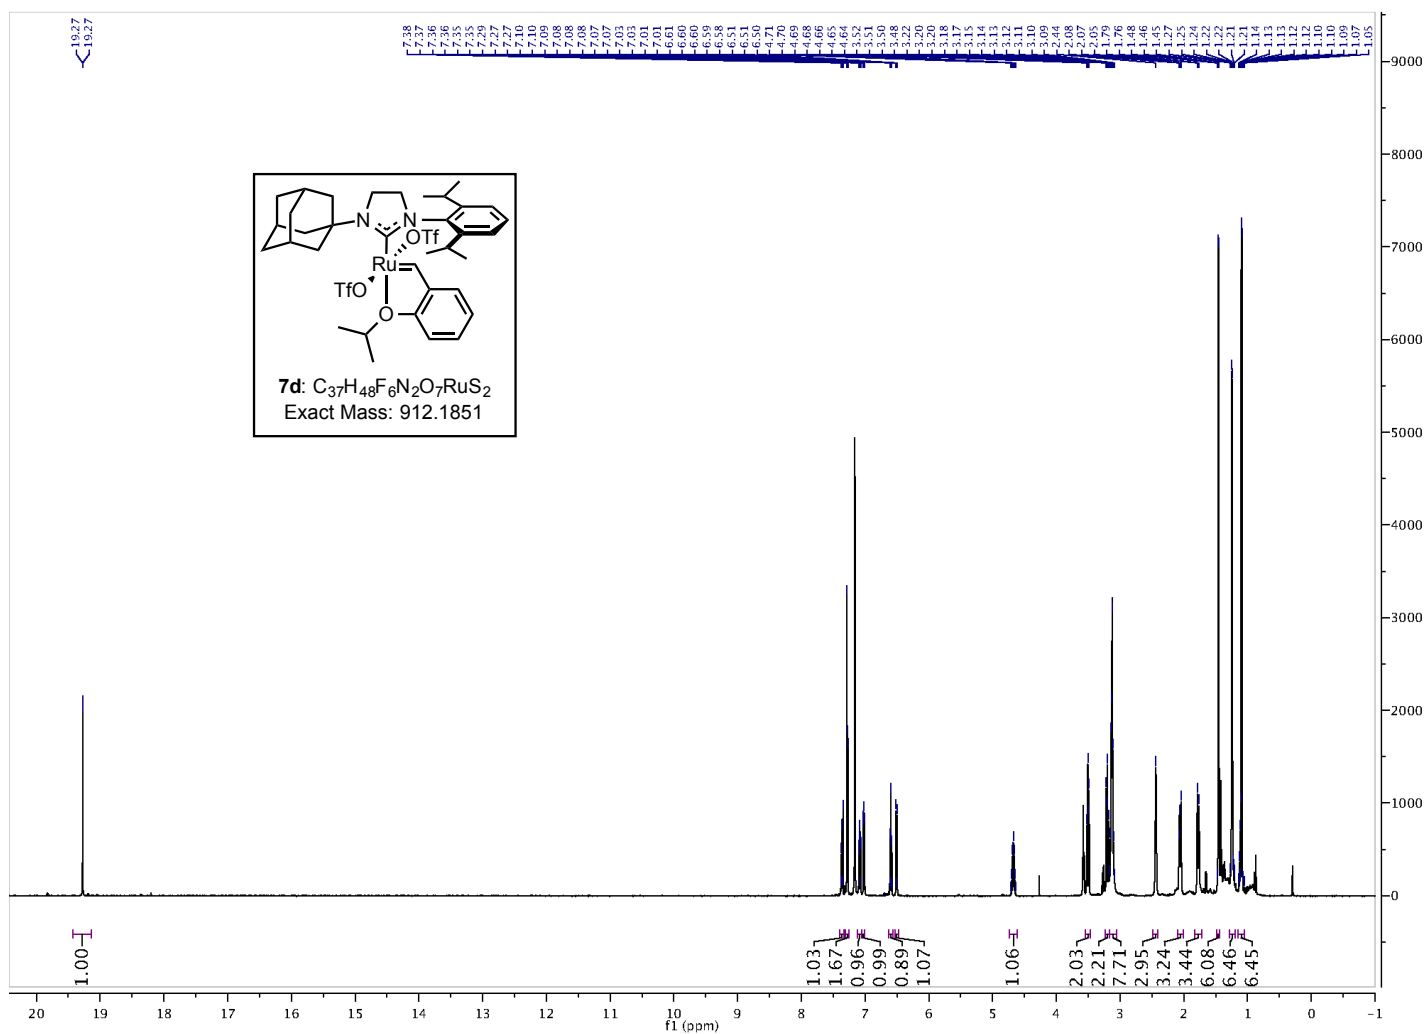

$^{13}\text{C}$  NMR (126 MHz,  $\text{C}_6\text{D}_6$ ) spectrum of compound **7d**.

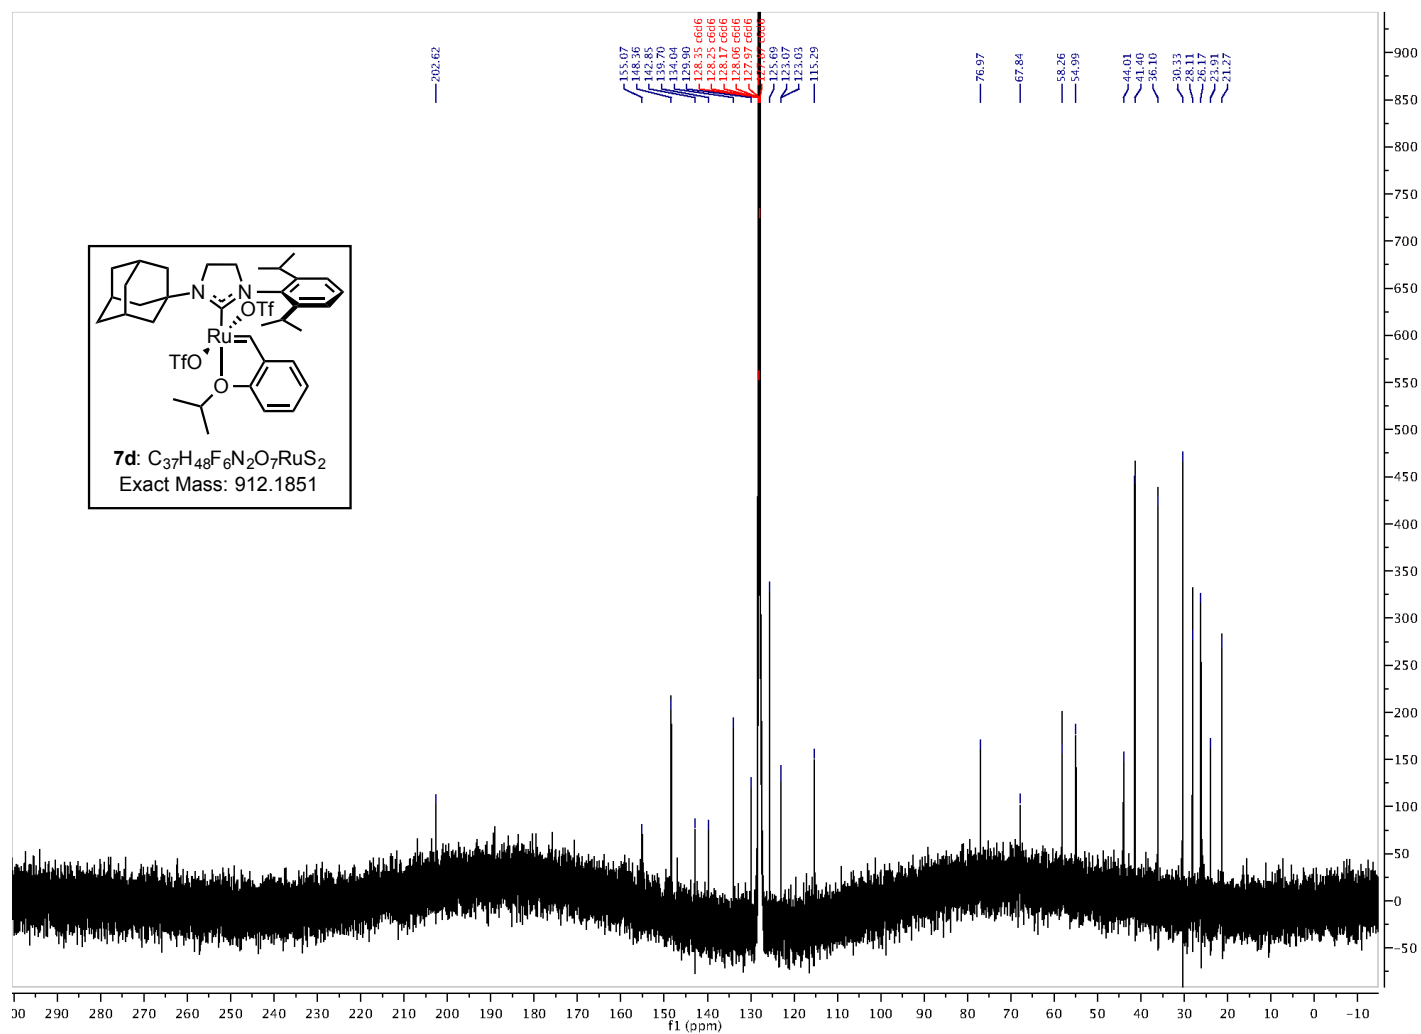

$^1\text{H}$  NMR (500 MHz,  $\text{C}_6\text{D}_6$ ) spectrum of compound **6a**.

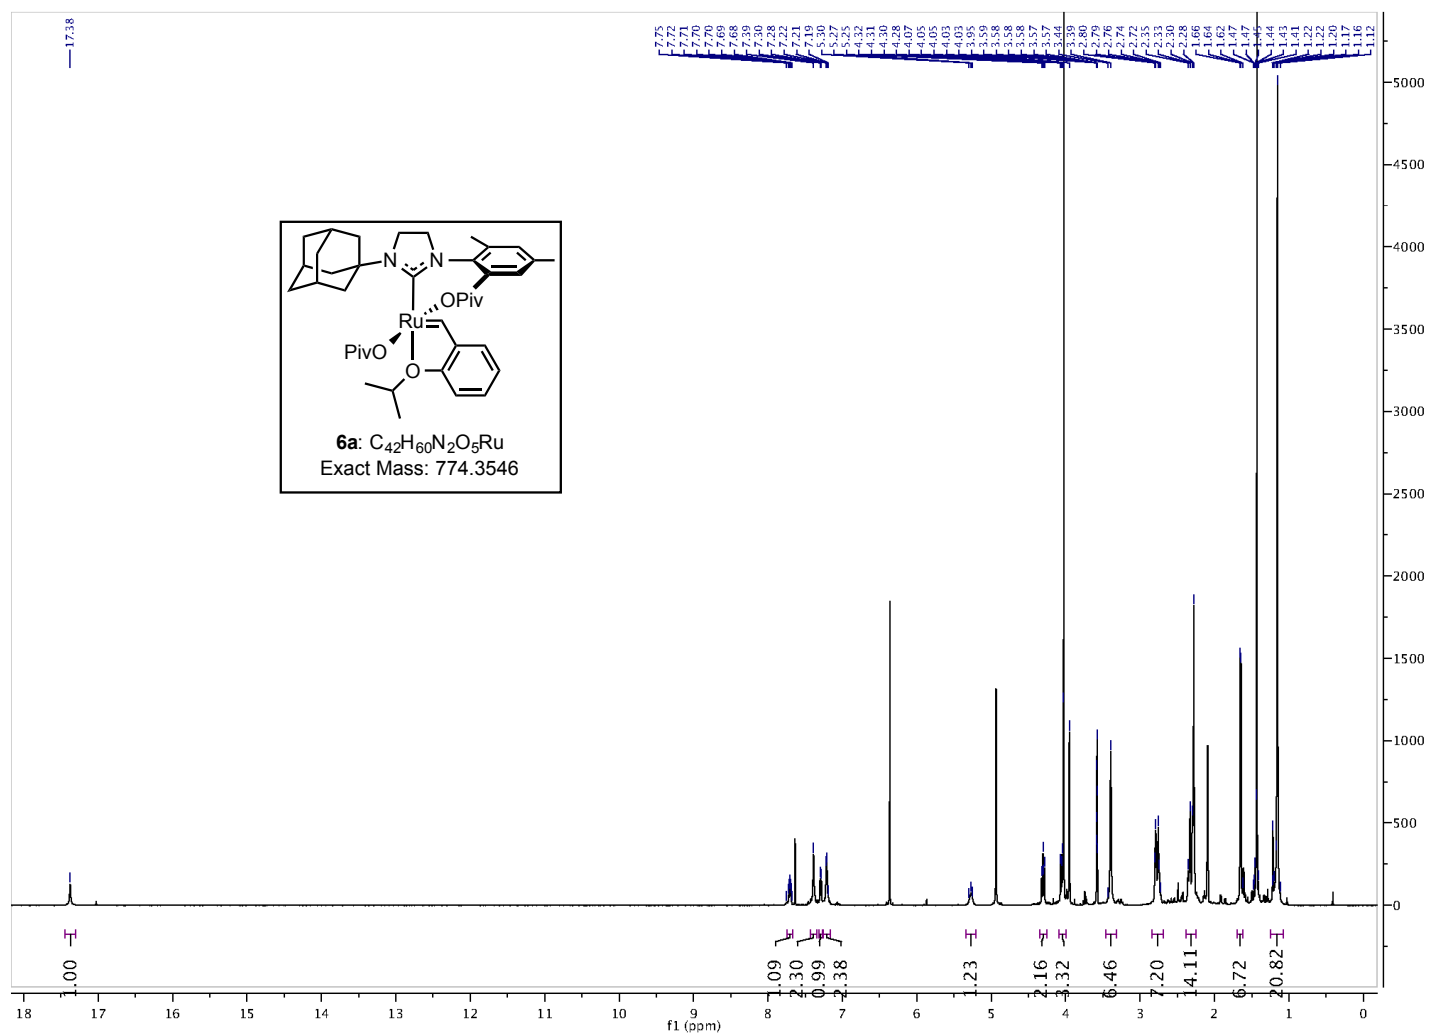



$^1\text{H}$  NMR (500 MHz,  $\text{C}_6\text{D}_6$ ) spectrum of compound **10a**.

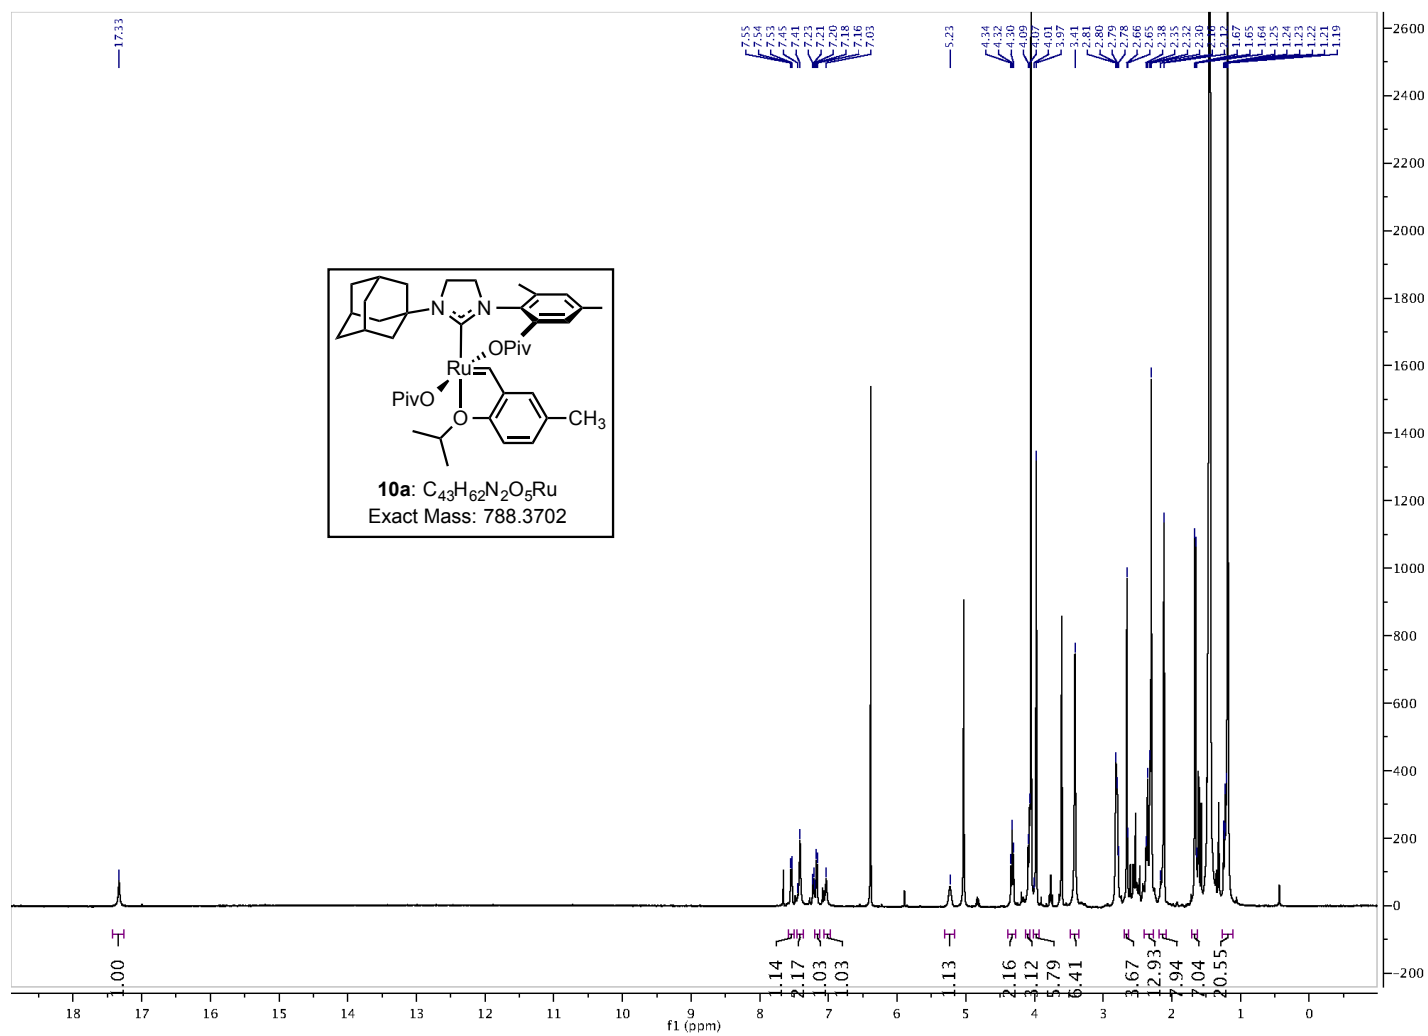



$^1\text{H}$  NMR (500 MHz,  $\text{C}_6\text{D}_6$ ) spectrum of compound **10b**.

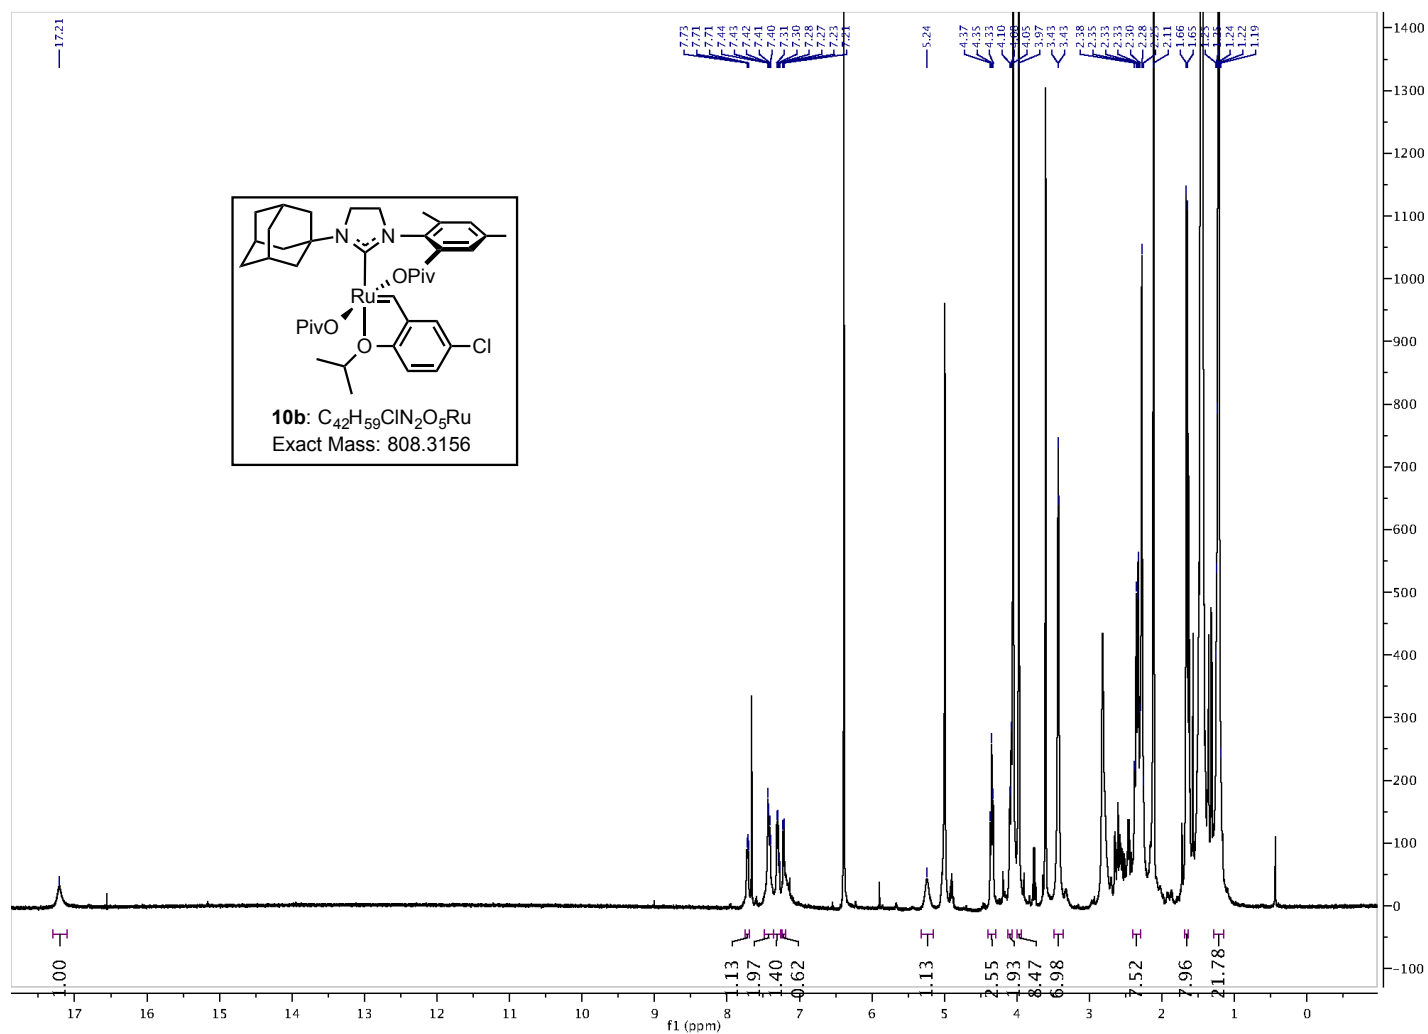

$^1\text{H}$  NMR (500 MHz,  $\text{C}_6\text{D}_6$ ) spectrum of compound **10c**.

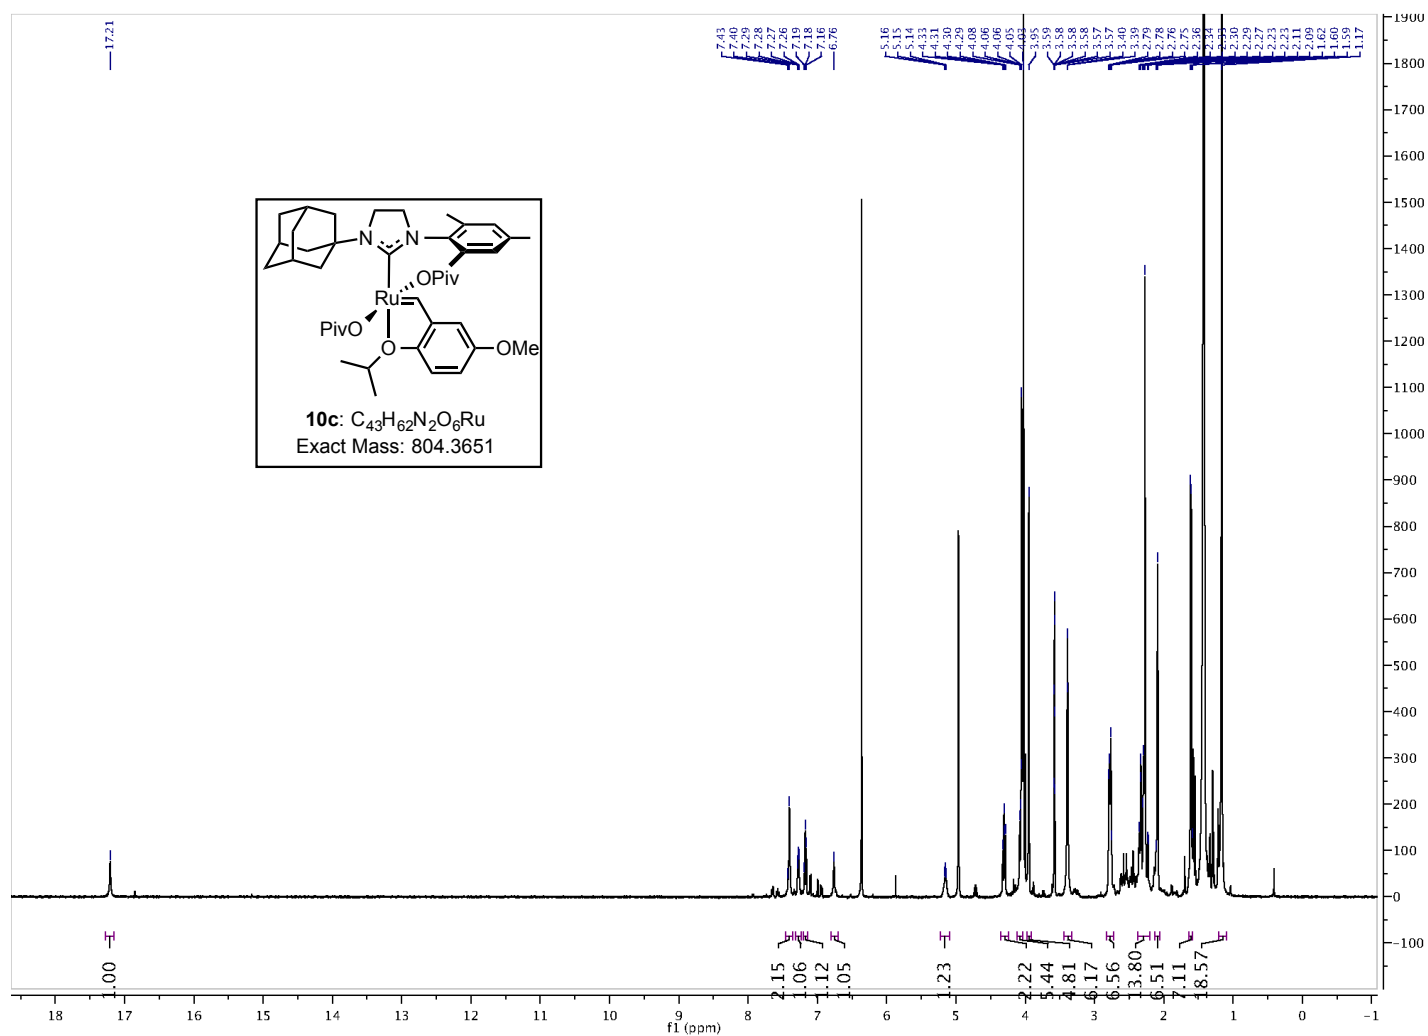

$^1\text{H}$  NMR (500 MHz,  $\text{C}_6\text{D}_6$ ) spectrum of compound **8a**.

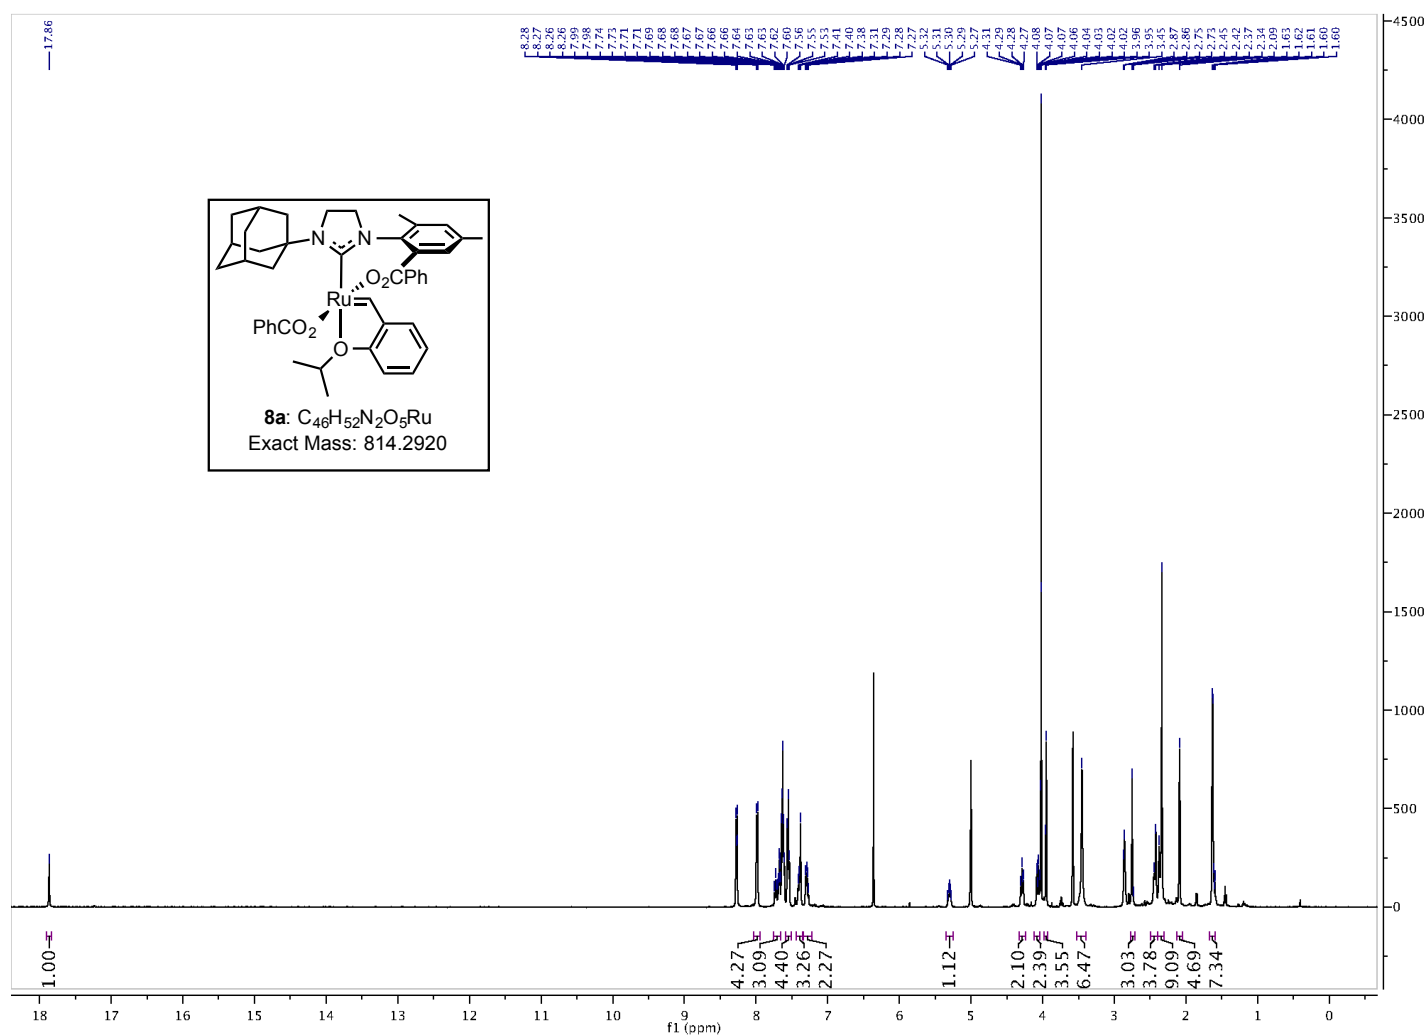

$^1\text{H}$  NMR (500 MHz,  $\text{C}_6\text{D}_6$ ) spectrum of compound **8b**.

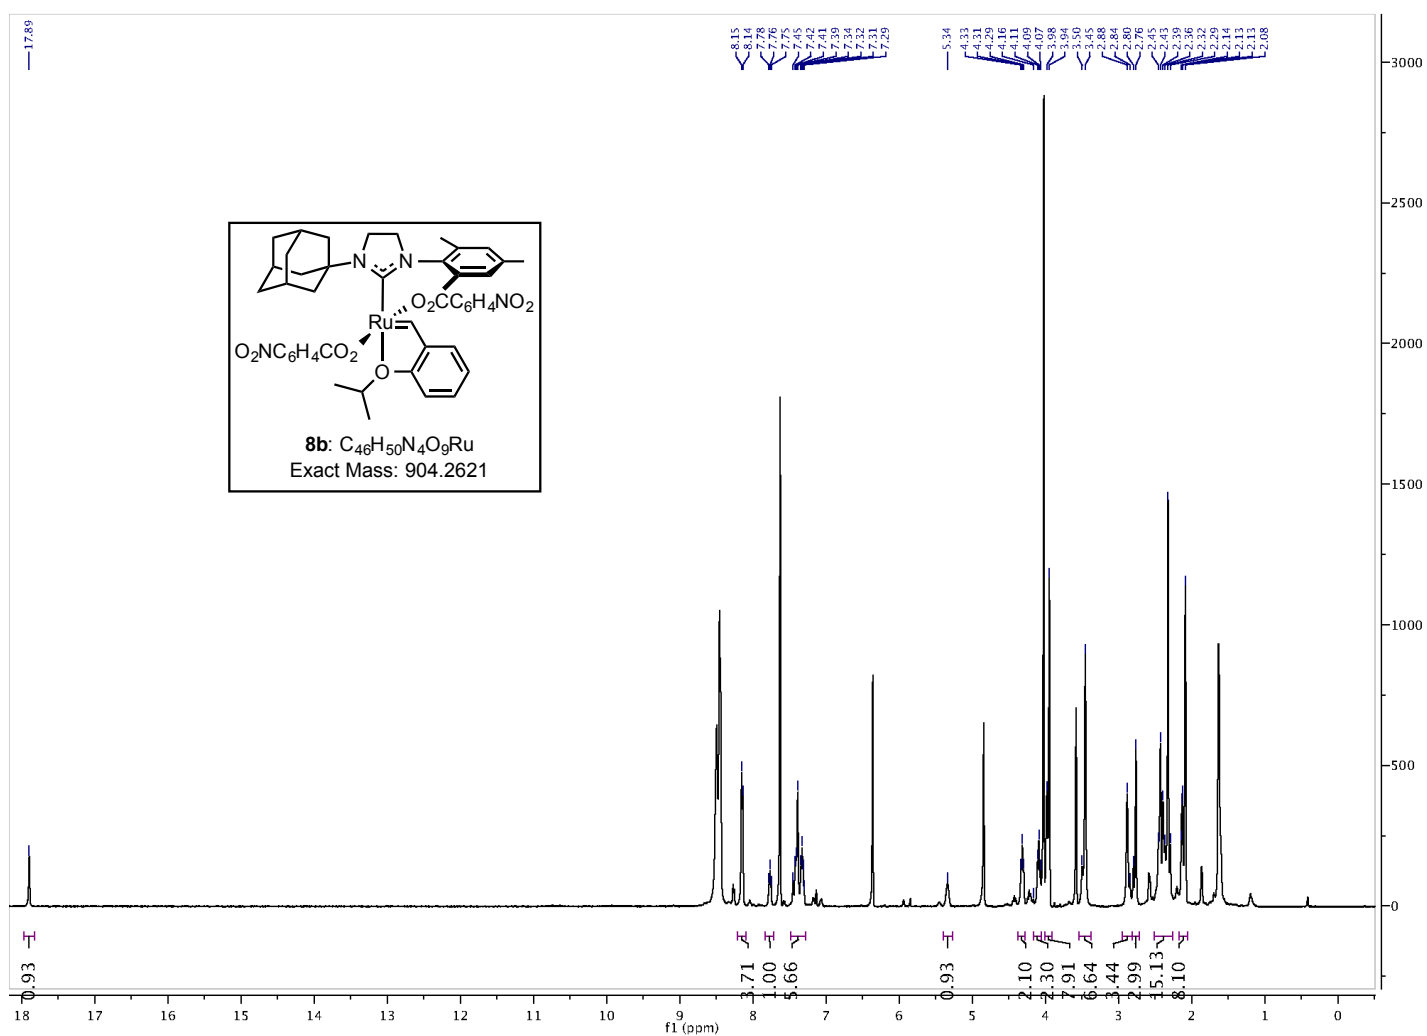

$^1\text{H}$  NMR (500 MHz,  $\text{C}_6\text{D}_6$ ) spectrum of compound **8c**.

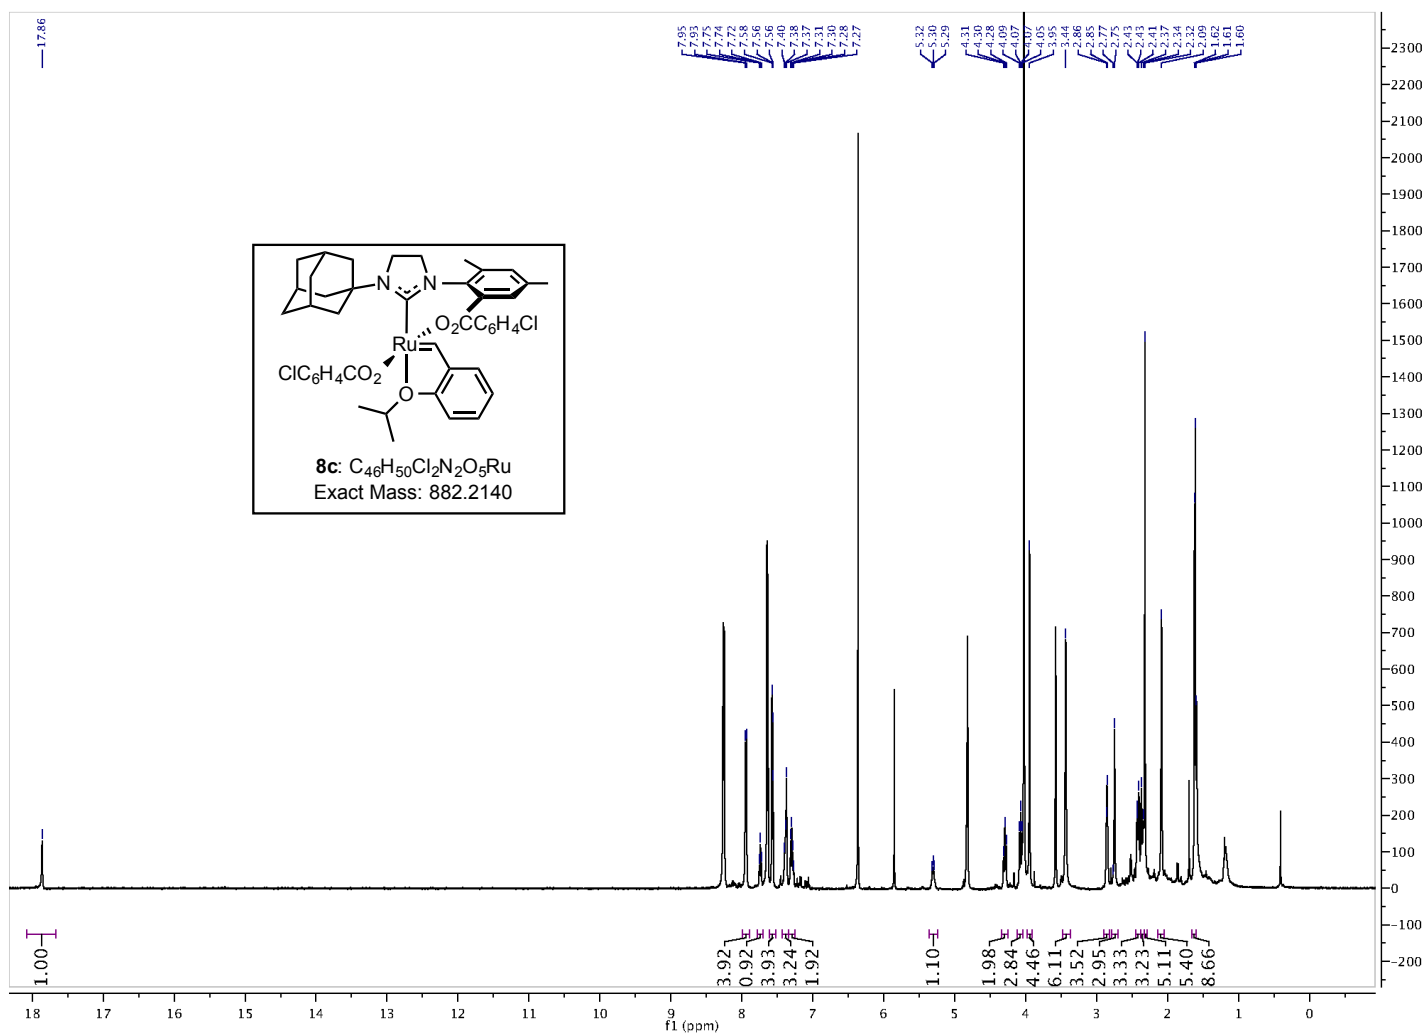

$^1\text{H}$  NMR (500 MHz,  $\text{C}_6\text{D}_6$ ) spectrum of compound **8d**.

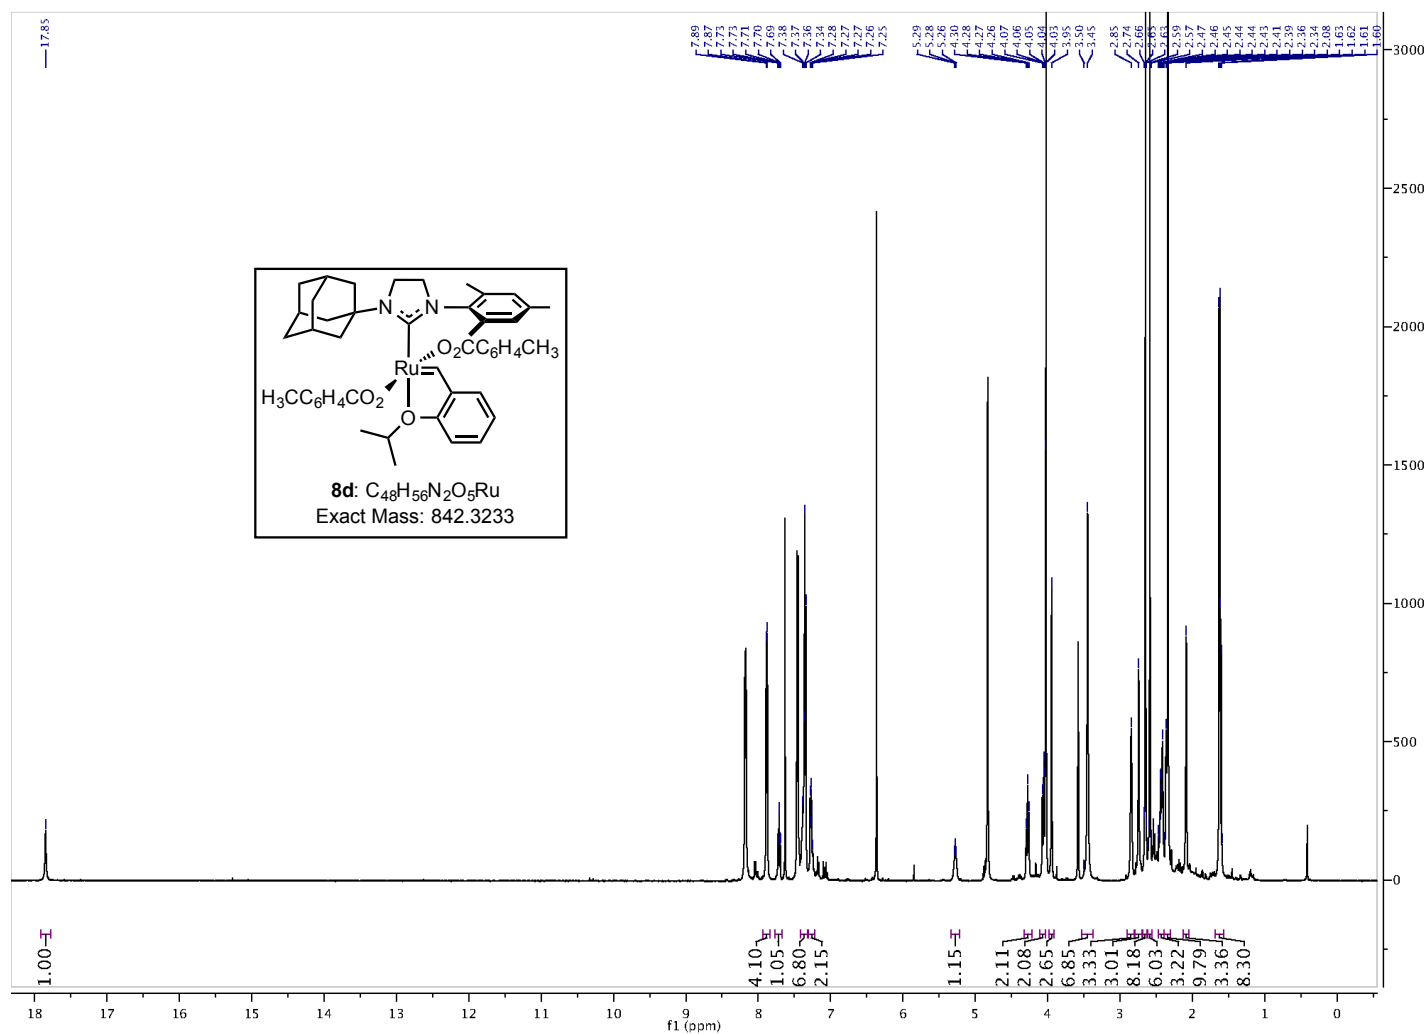

$^1\text{H}$  NMR (500 MHz,  $\text{C}_6\text{D}_6$ ) spectrum of compound **8e**.

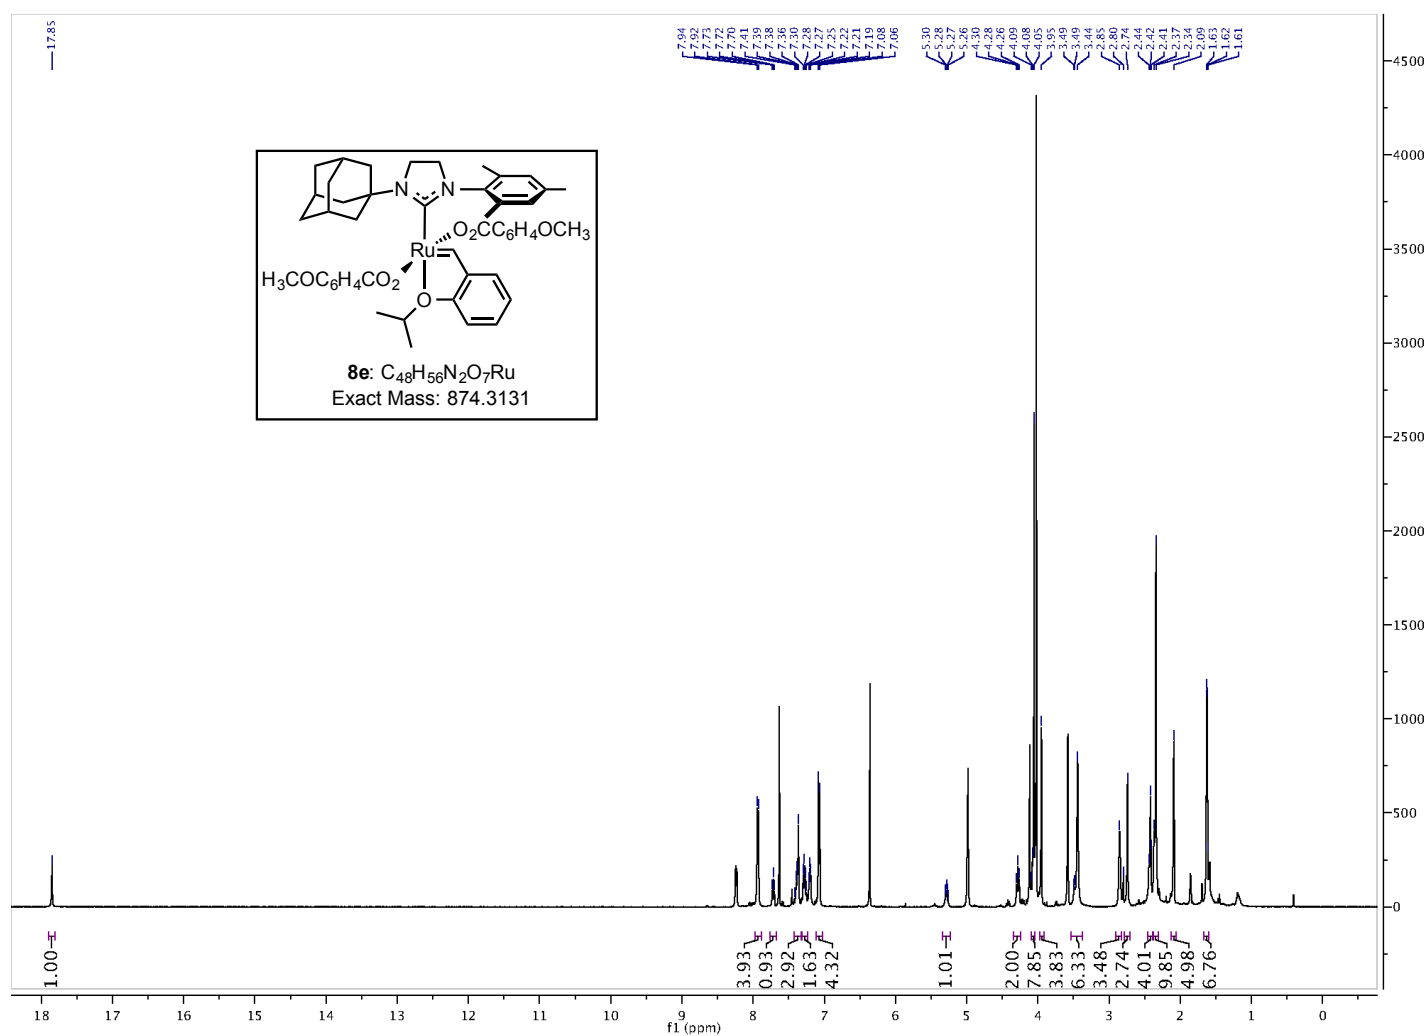

$^1\text{H}$  NMR (500 MHz,  $\text{C}_6\text{D}_6$ ) spectrum of compound **9a**.

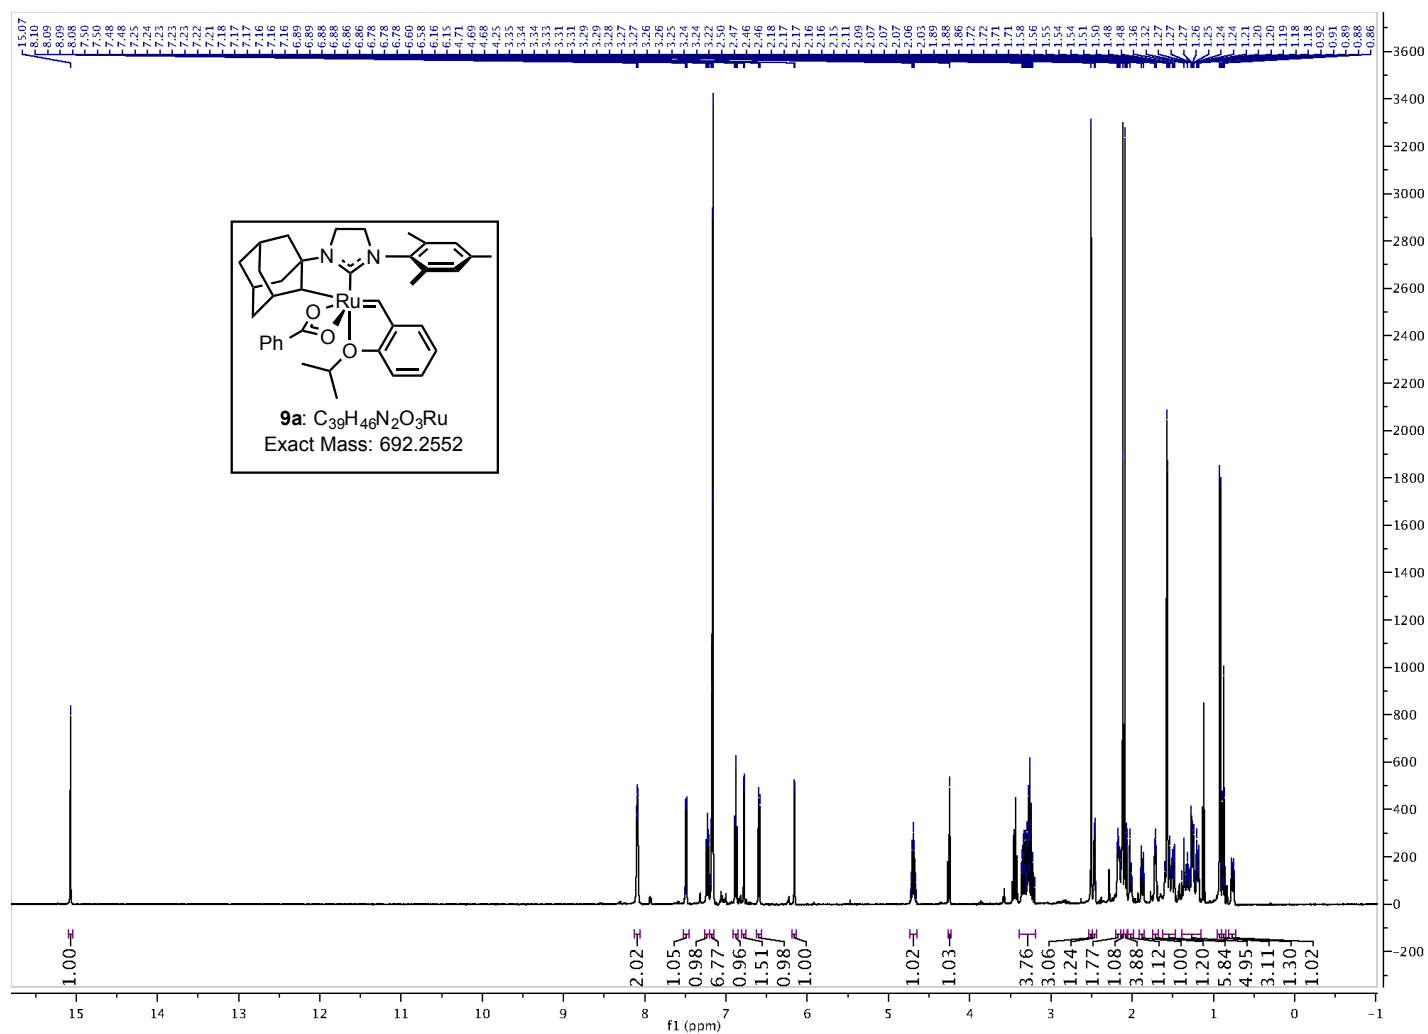



$^{13}\text{C}$  NMR (126 MHz,  $\text{C}_6\text{D}_6$ ) spectrum of compound **9a**.

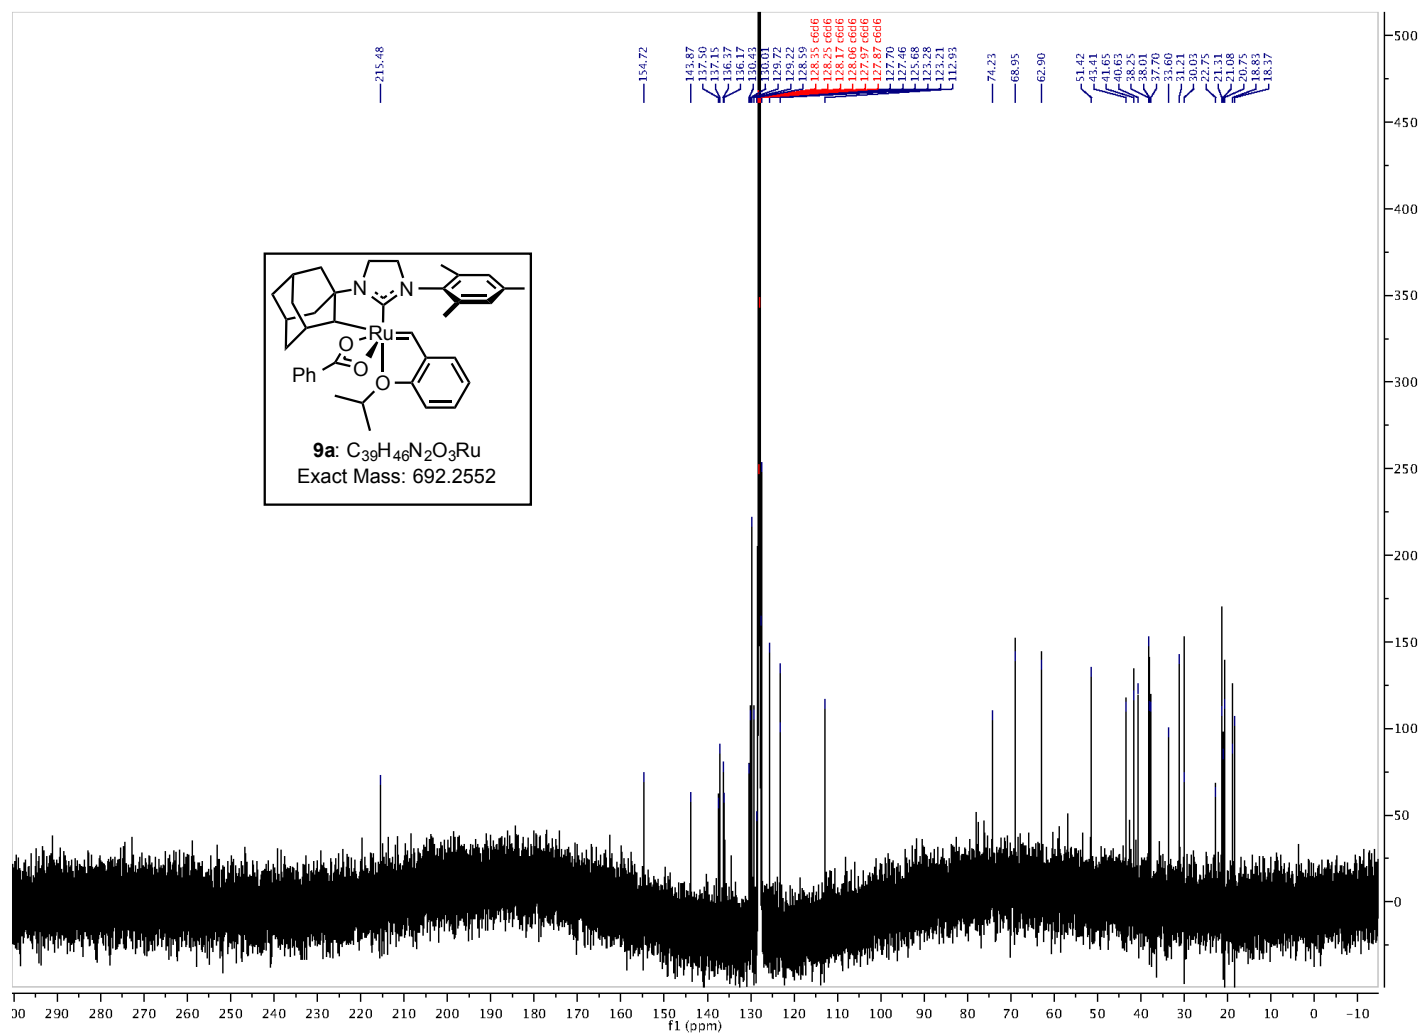

$^1\text{H}$  NMR (500 MHz,  $\text{C}_6\text{D}_6$ ) spectrum of compound **9c**.

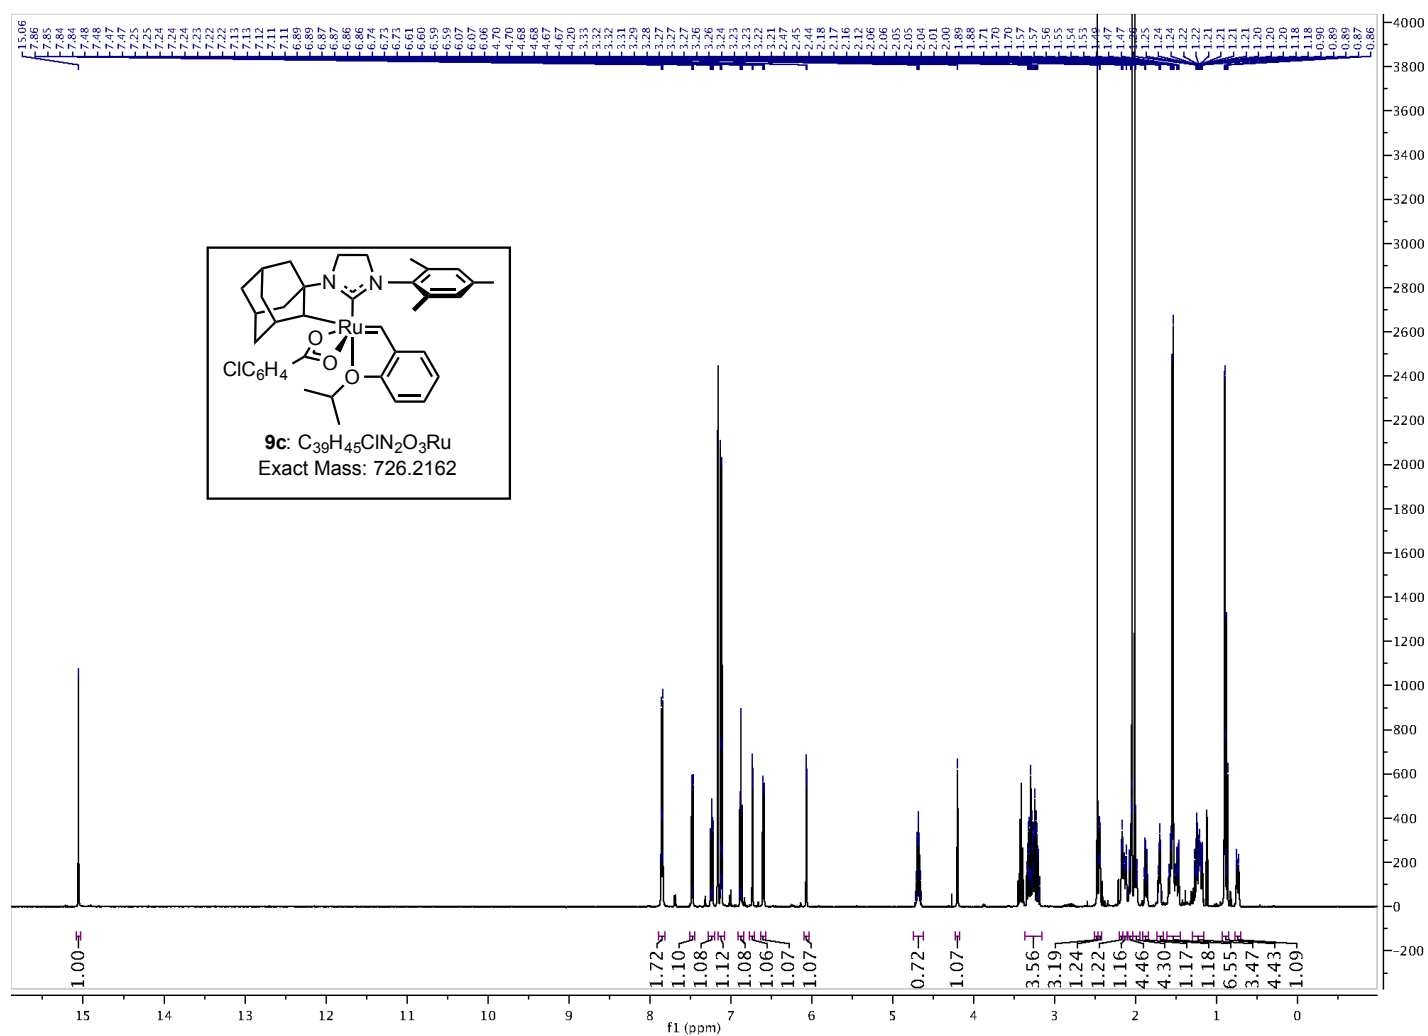

$^{13}\text{C}$  NMR (126 MHz,  $\text{C}_6\text{D}_6$ ) spectrum of compound **9c**.

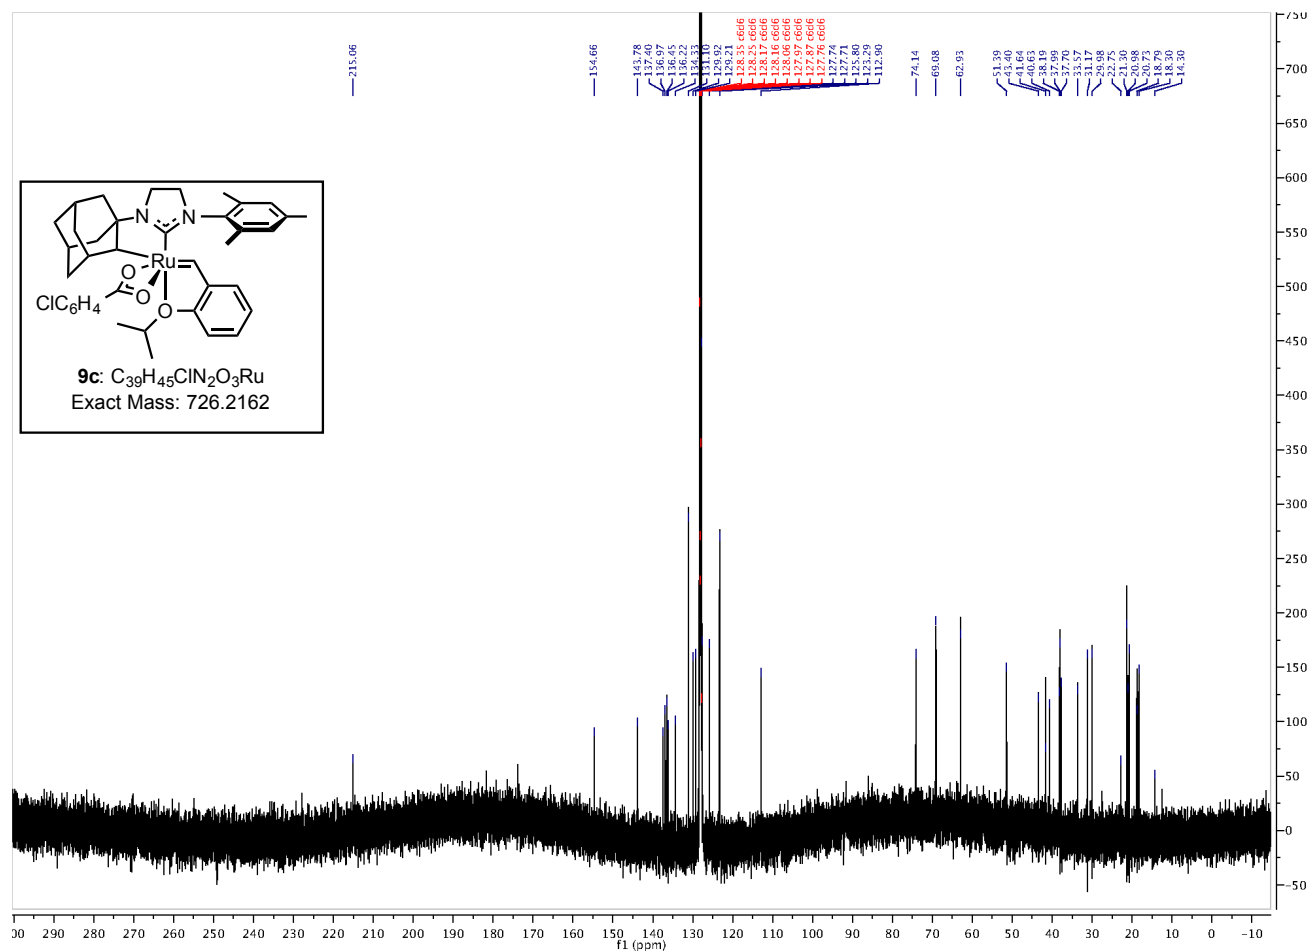

$^1\text{H}$  NMR (500 MHz,  $\text{C}_6\text{D}_6$ ) spectrum of compound **9d**.

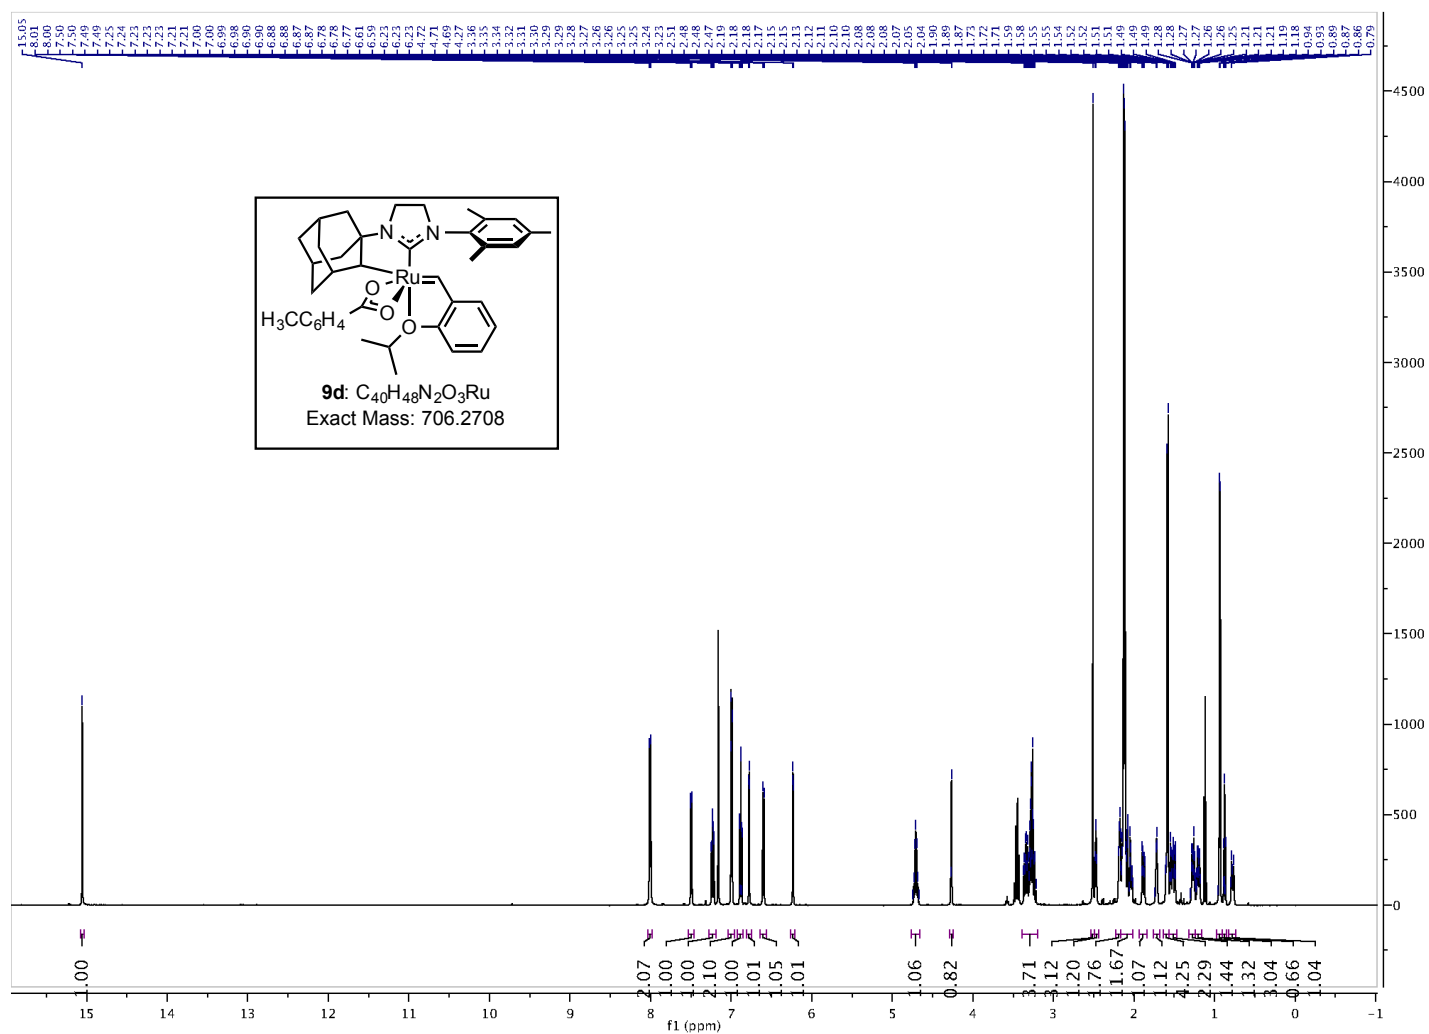

$^{13}\text{C}$  NMR (126 MHz,  $\text{C}_6\text{D}_6$ ) spectrum of compound **9d**.

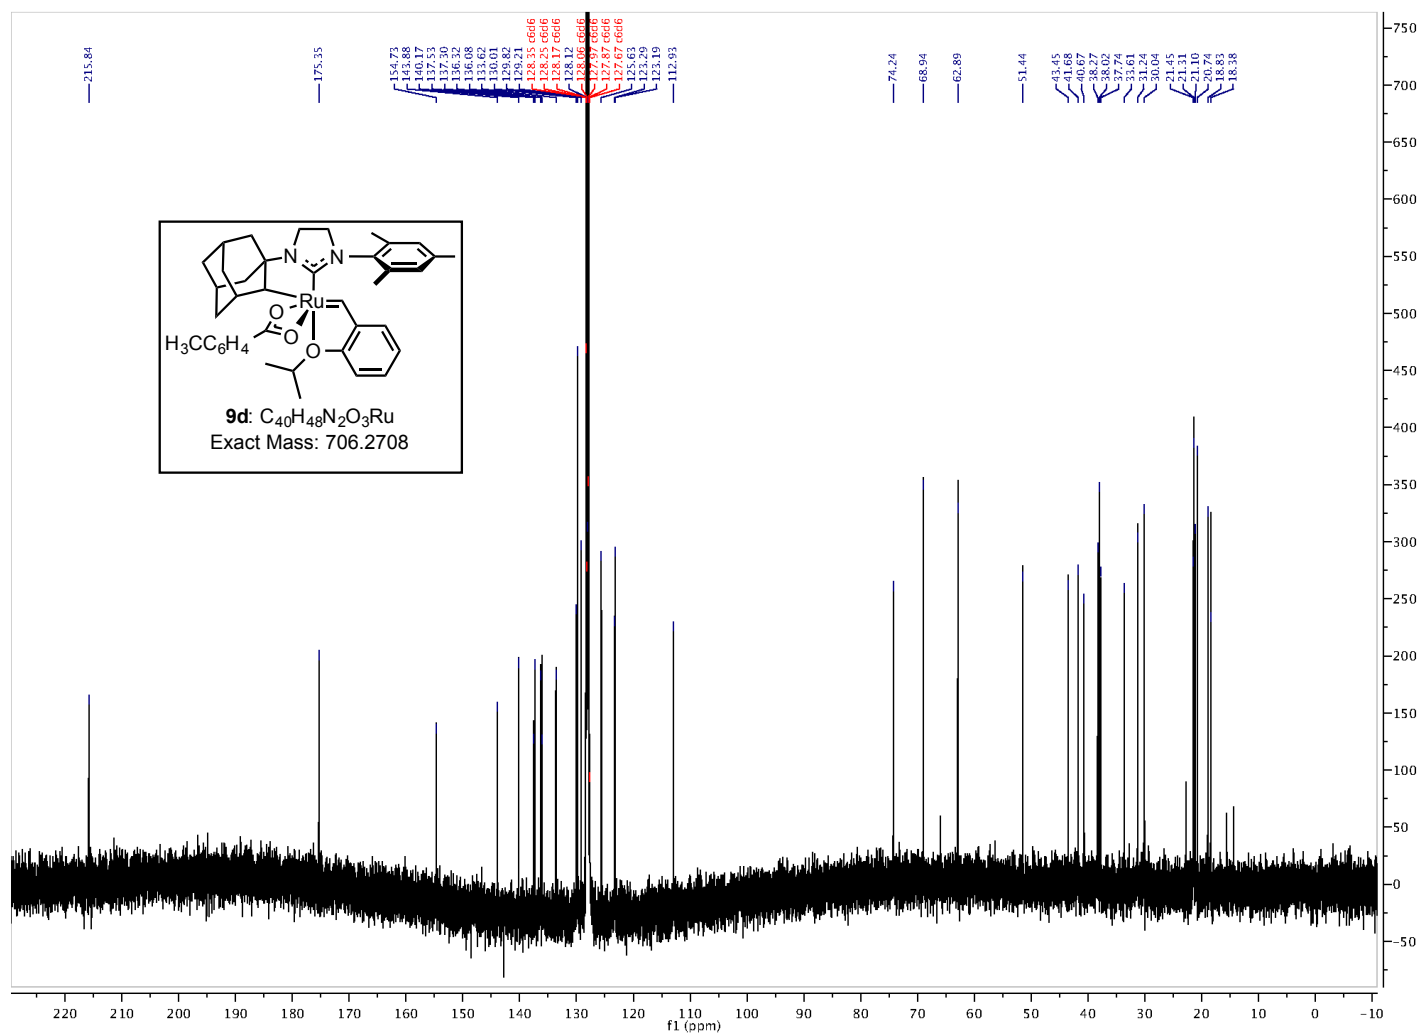

$^1\text{H}$  NMR (500 MHz,  $\text{C}_6\text{D}_6$ ) spectrum of compound **9e**.

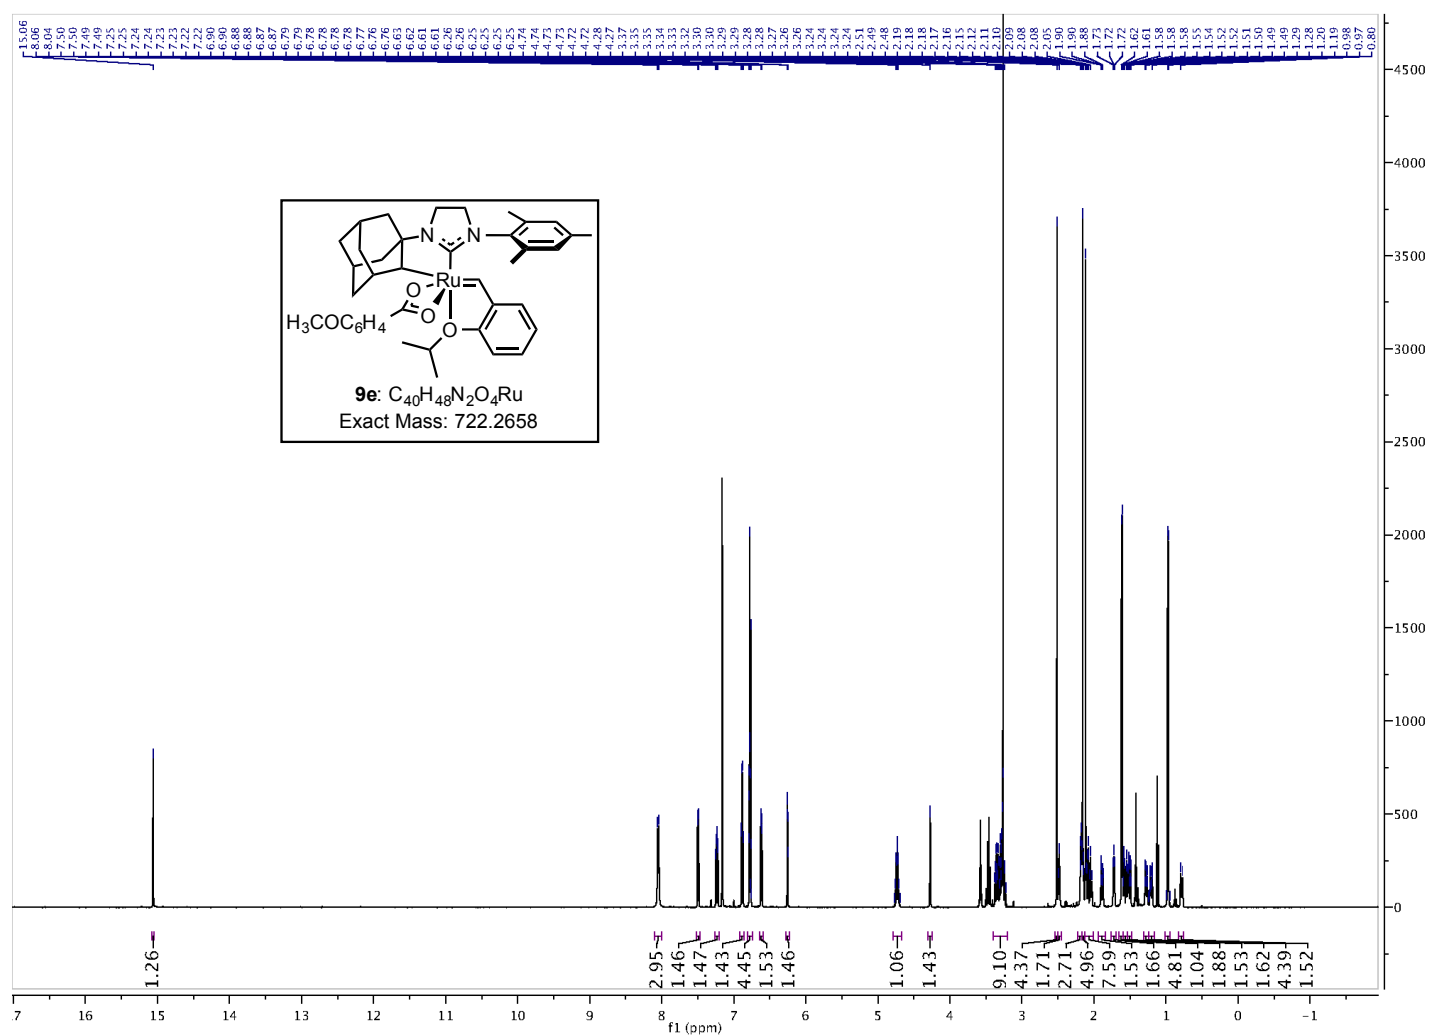

$^{13}\text{C}$  NMR (126 MHz,  $\text{C}_6\text{D}_6$ ) spectrum of compound **9e**.

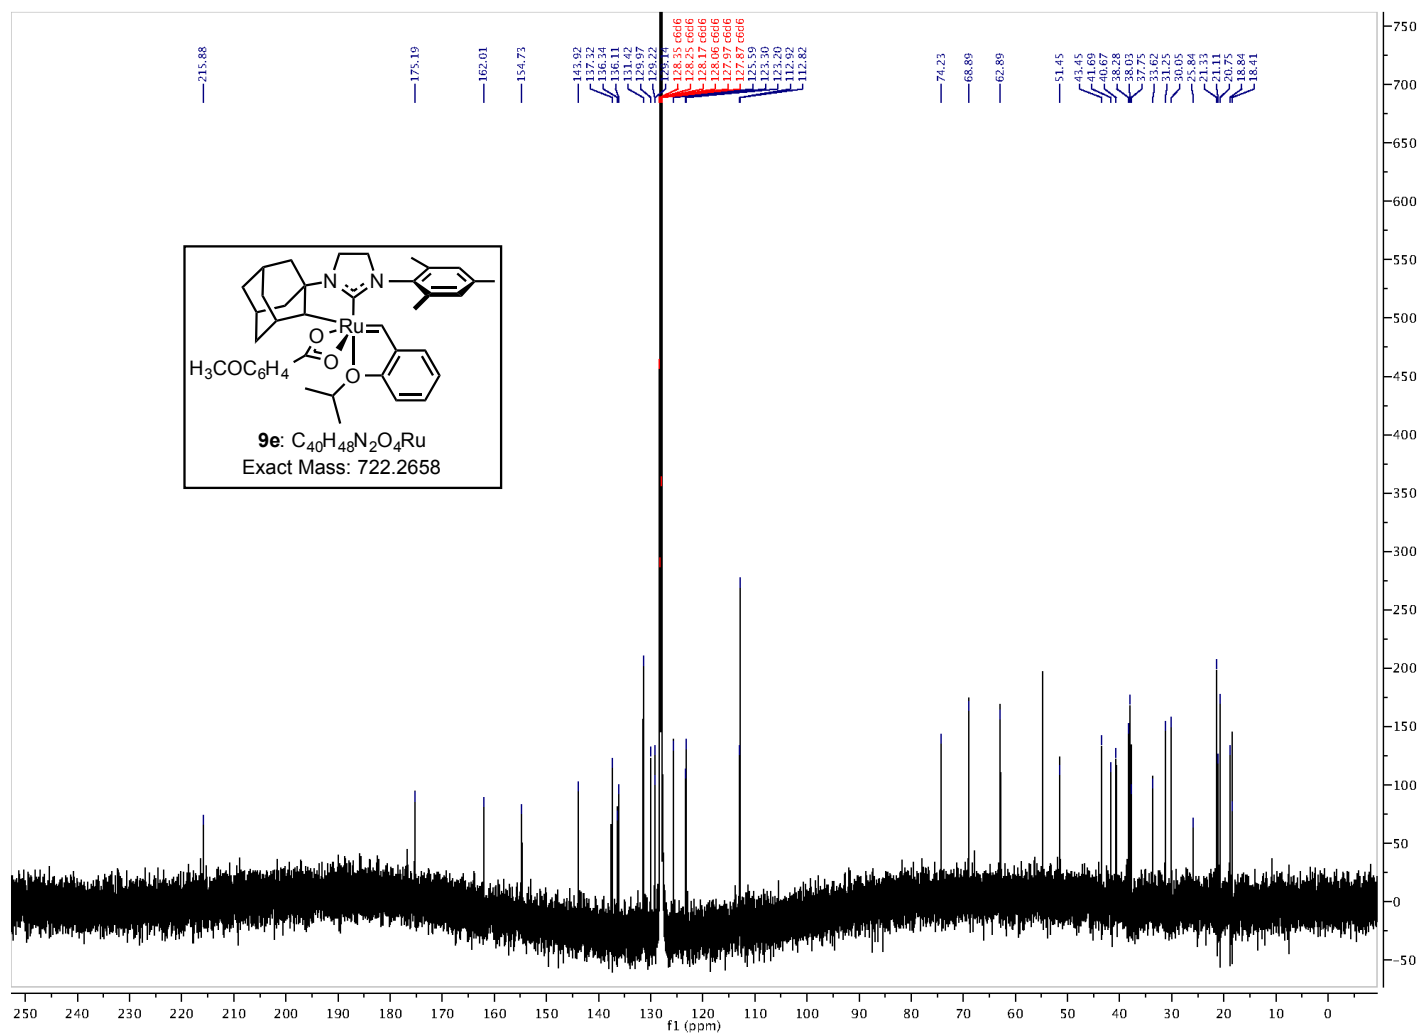

$^1\text{H}$  NMR (500 MHz,  $\text{C}_6\text{D}_6$ ) spectrum of compound **11a**.

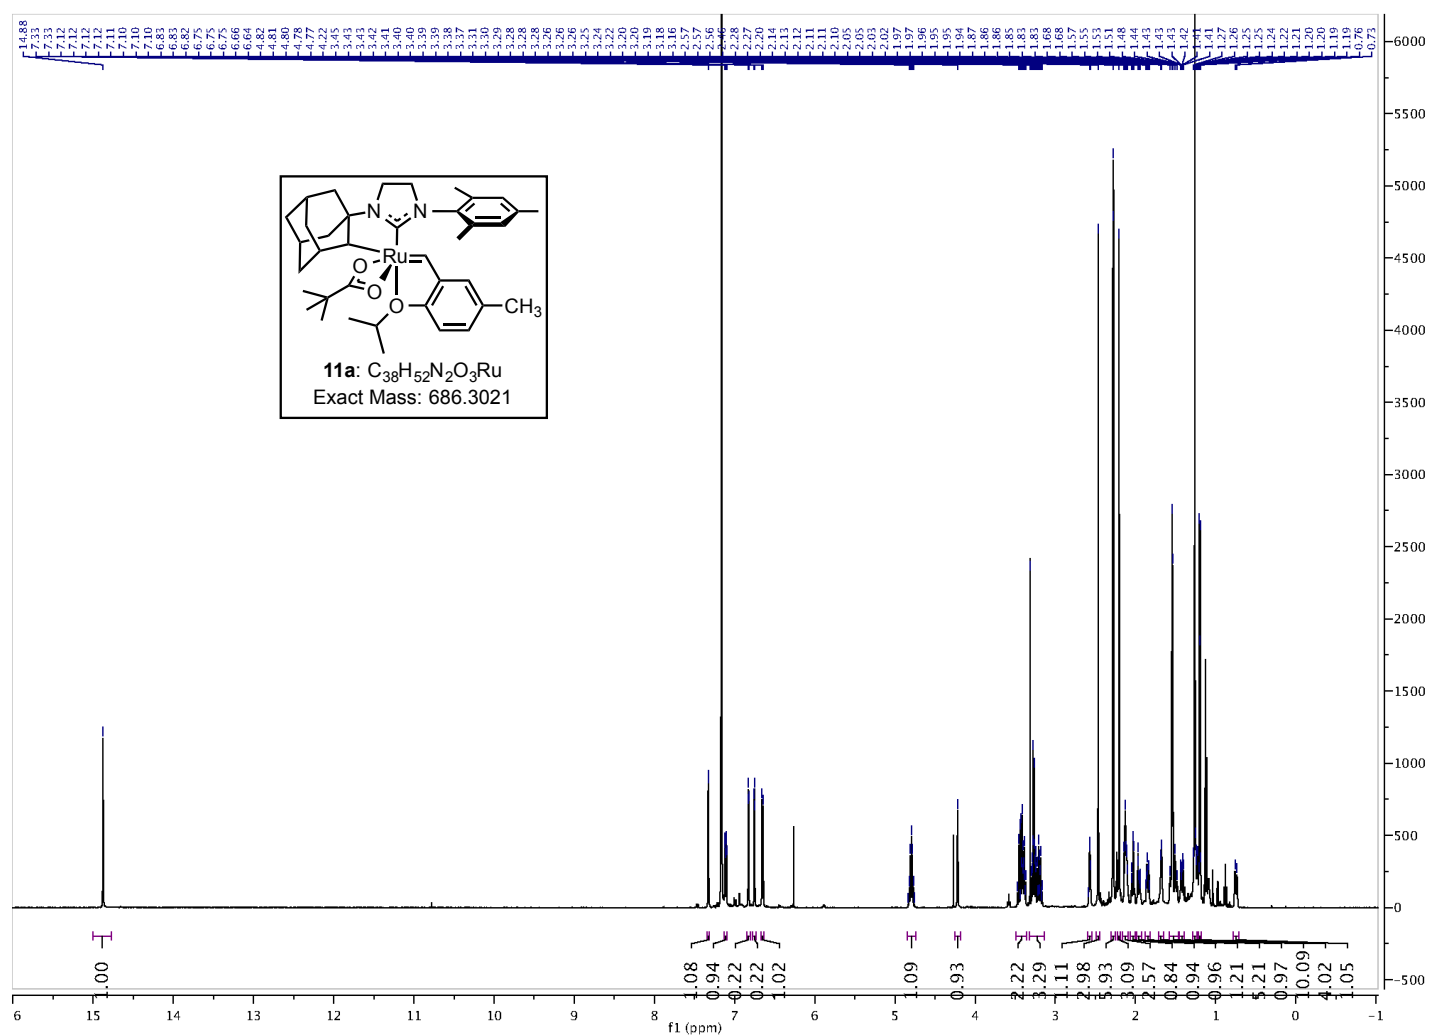



$^{13}\text{C}$  NMR (126 MHz,  $\text{C}_6\text{D}_6$ ) spectrum of compound **11a**.

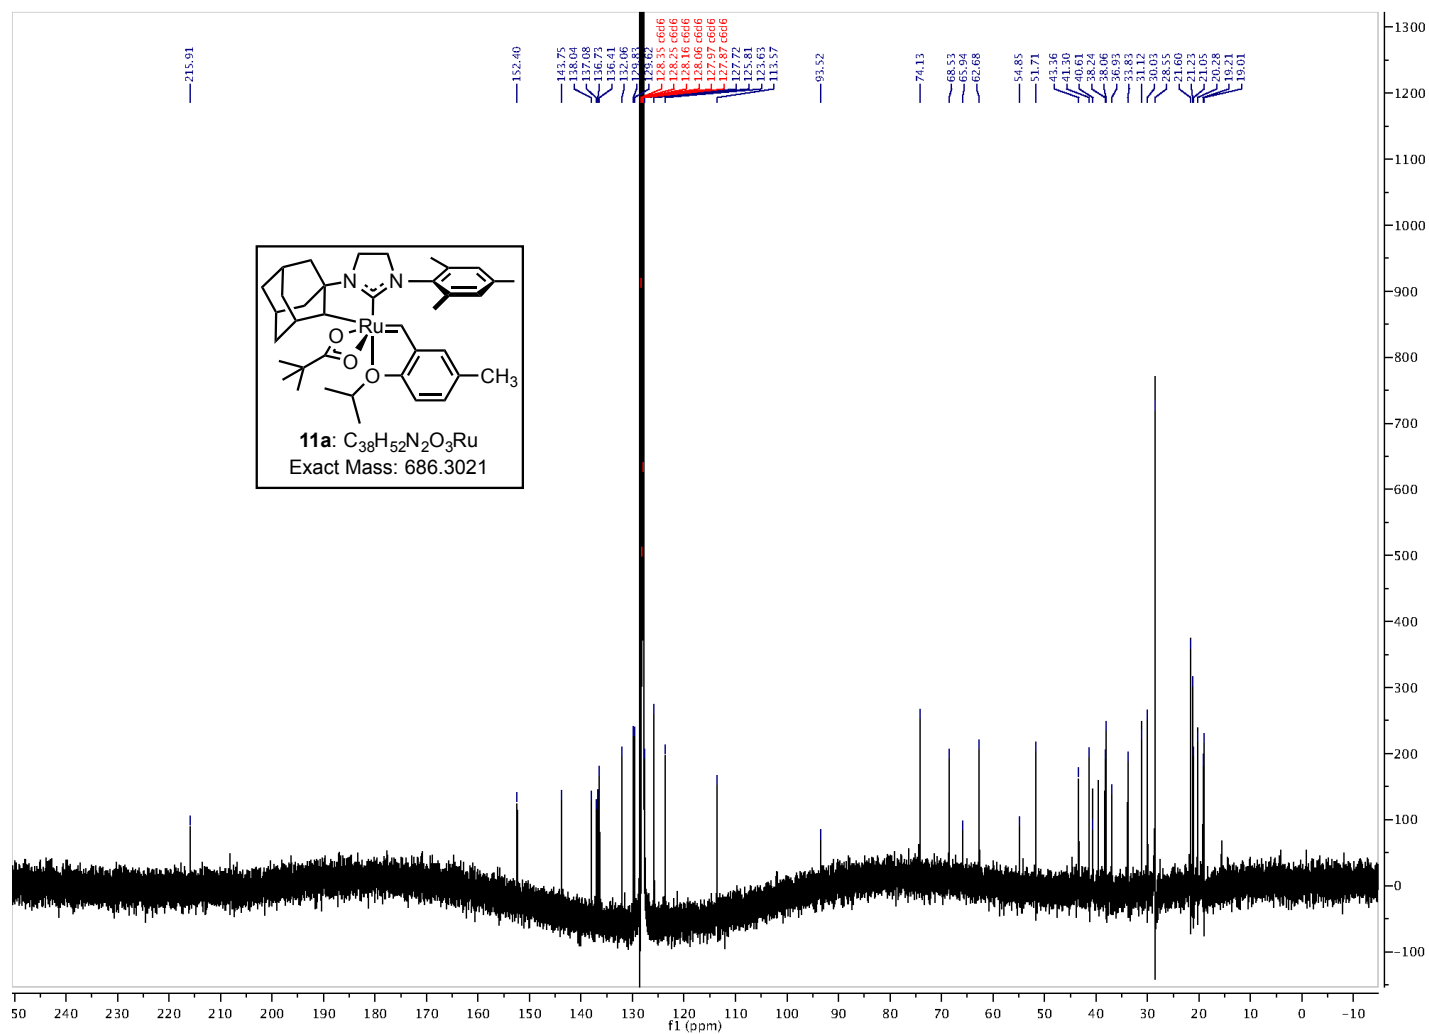

$^1\text{H}$  NMR (500 MHz,  $\text{C}_6\text{D}_6$ ) spectrum of compound **11b**.

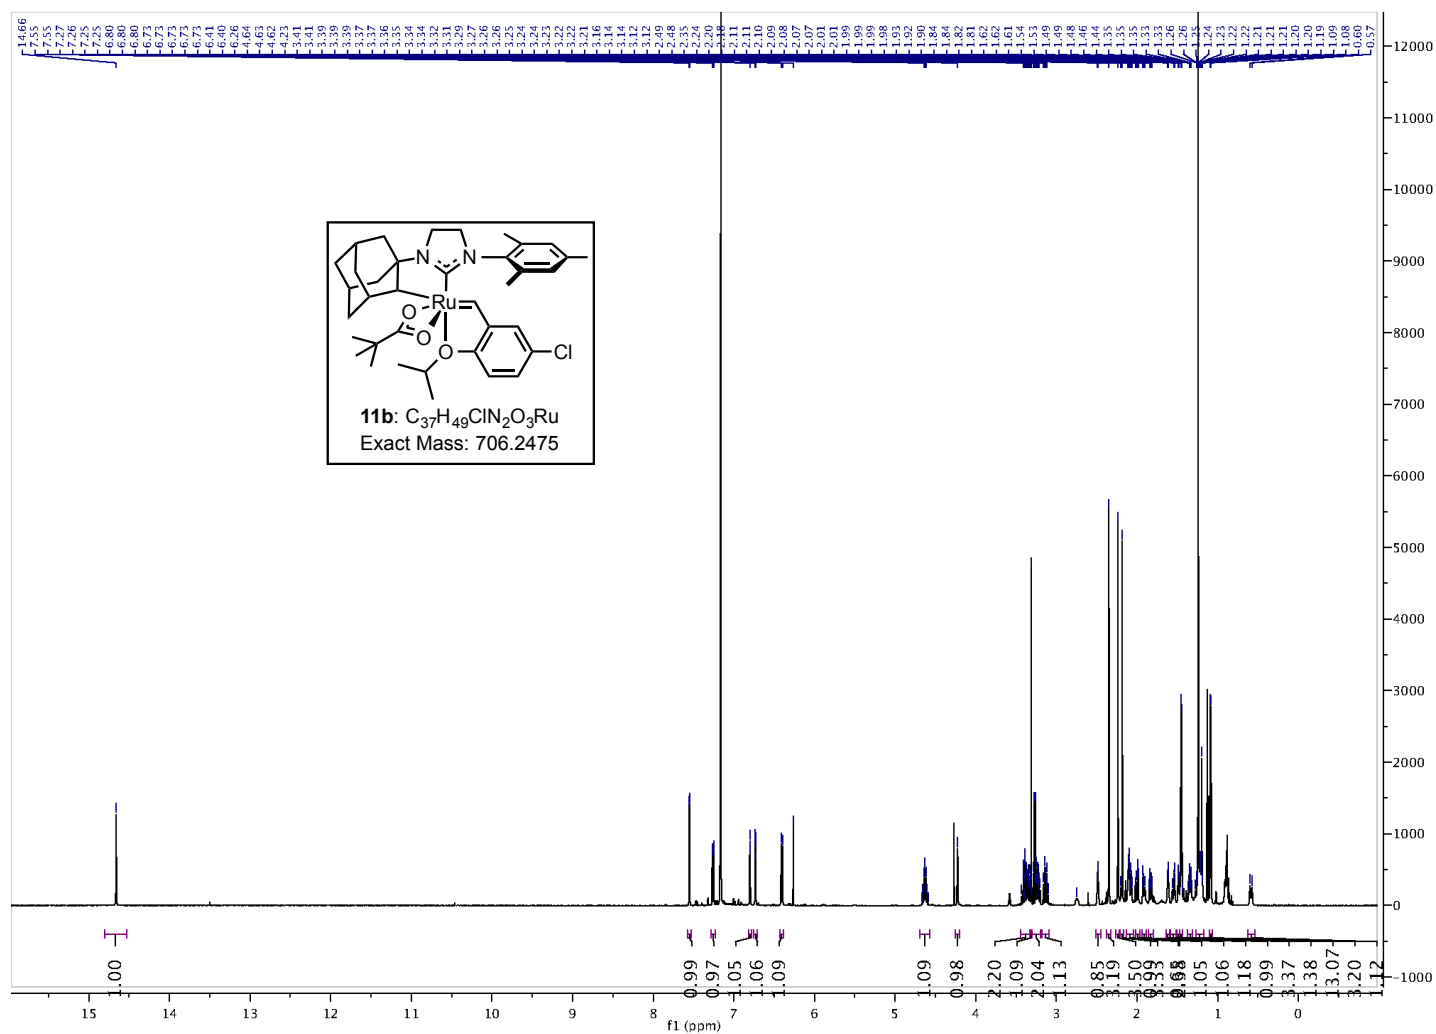

$^{13}\text{C}$  NMR (126 MHz,  $\text{C}_6\text{D}_6$ ) spectrum of compound **11b**.

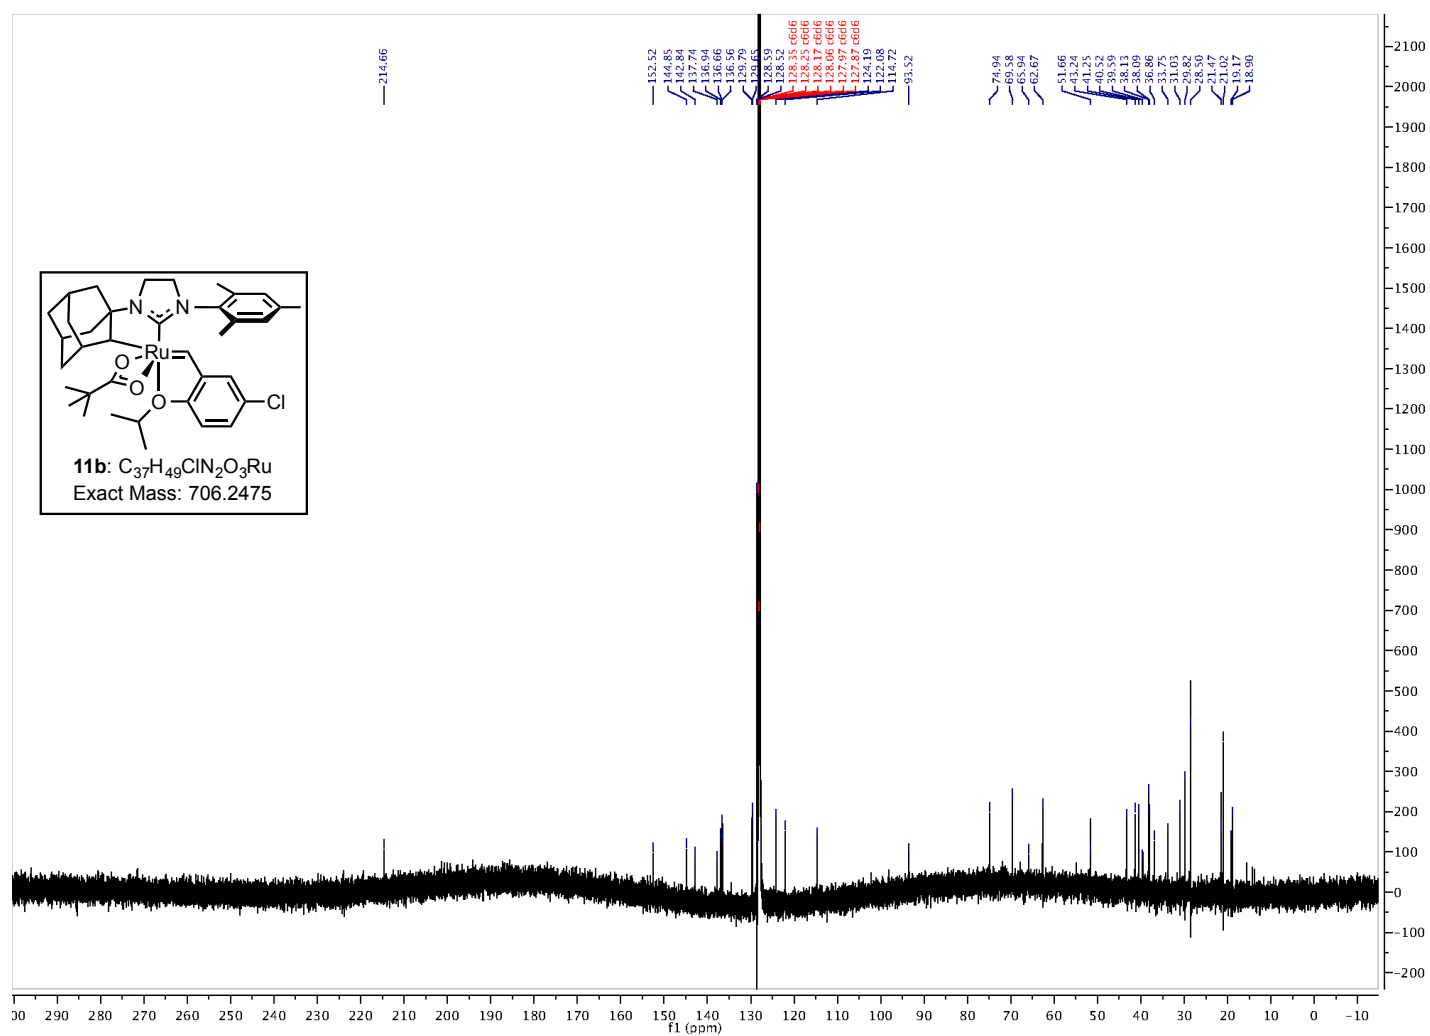



$^{13}\text{C}$  NMR (126 MHz,  $\text{C}_6\text{D}_6$ ) spectrum of compound **11c**.

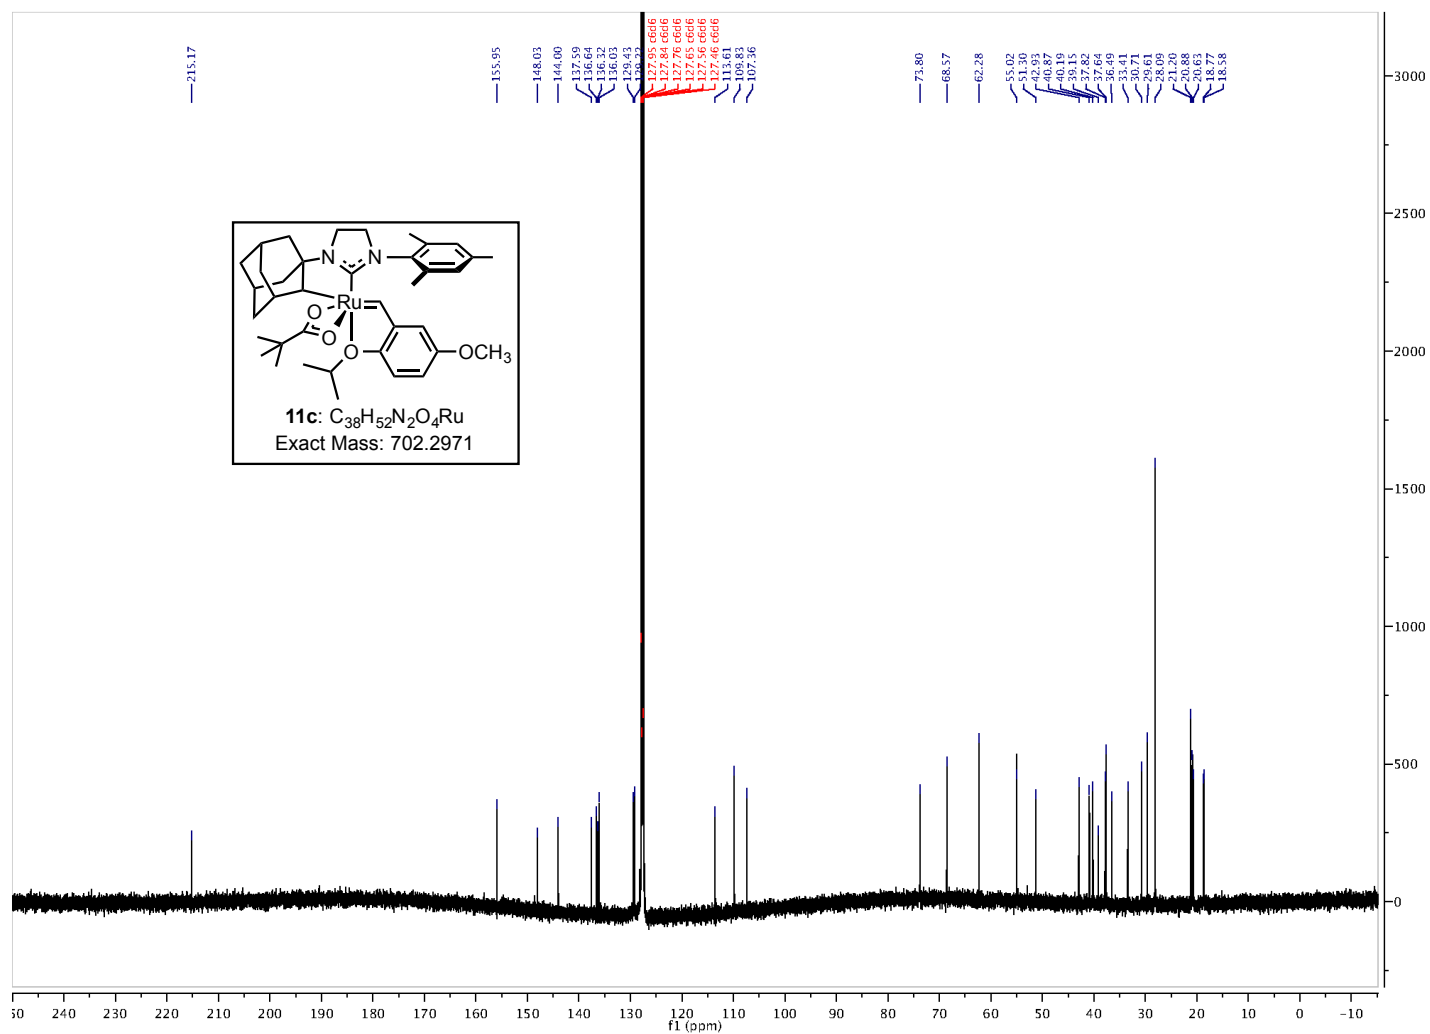

$^1\text{H}$  NMR (500 MHz,  $\text{C}_6\text{D}_6$ ) spectrum of compound **S7**.

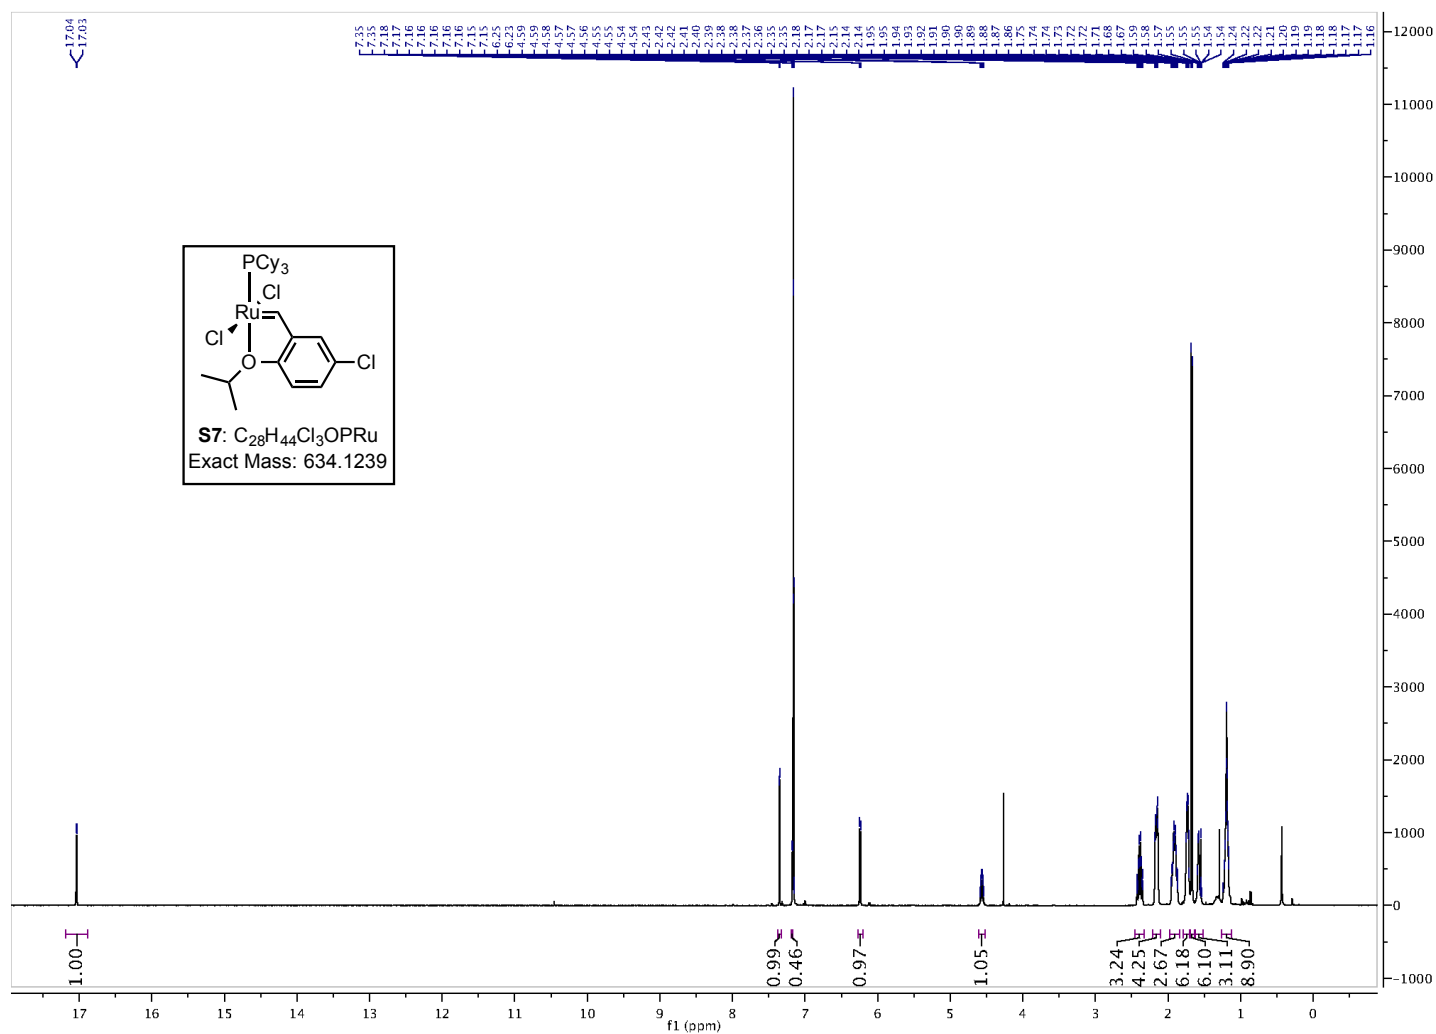

$^{13}\text{C}$  NMR (126 MHz,  $\text{C}_6\text{D}_6$ ) spectrum of compound **S7**.

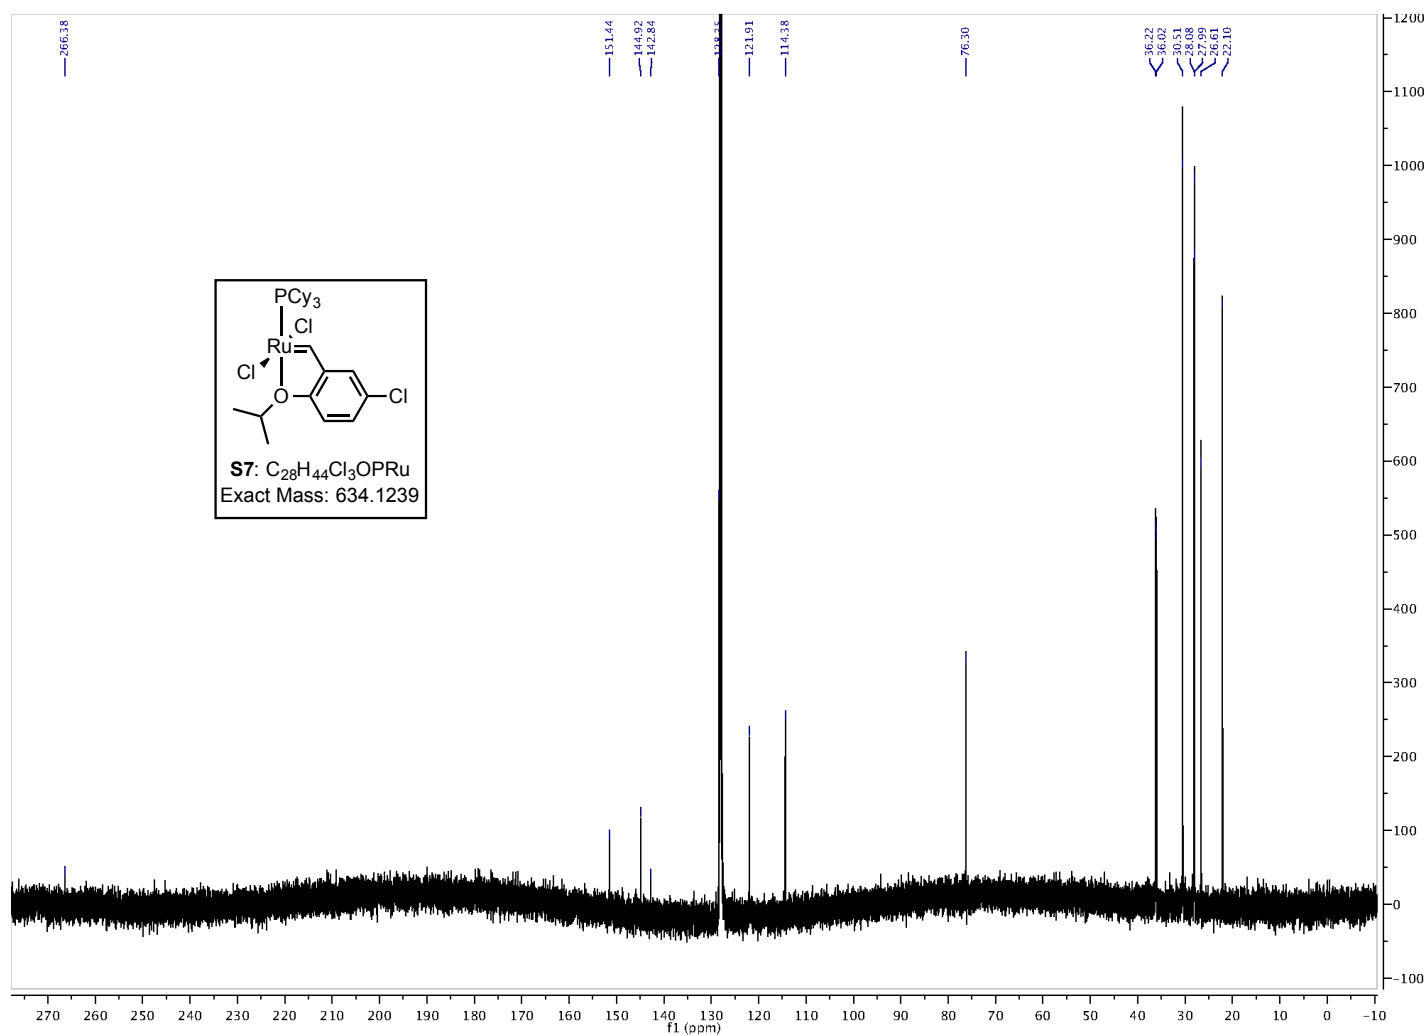

$^{31}\text{P}$  NMR (121 MHz,  $\text{C}_6\text{D}_6$ ) spectrum of compound **S7**.

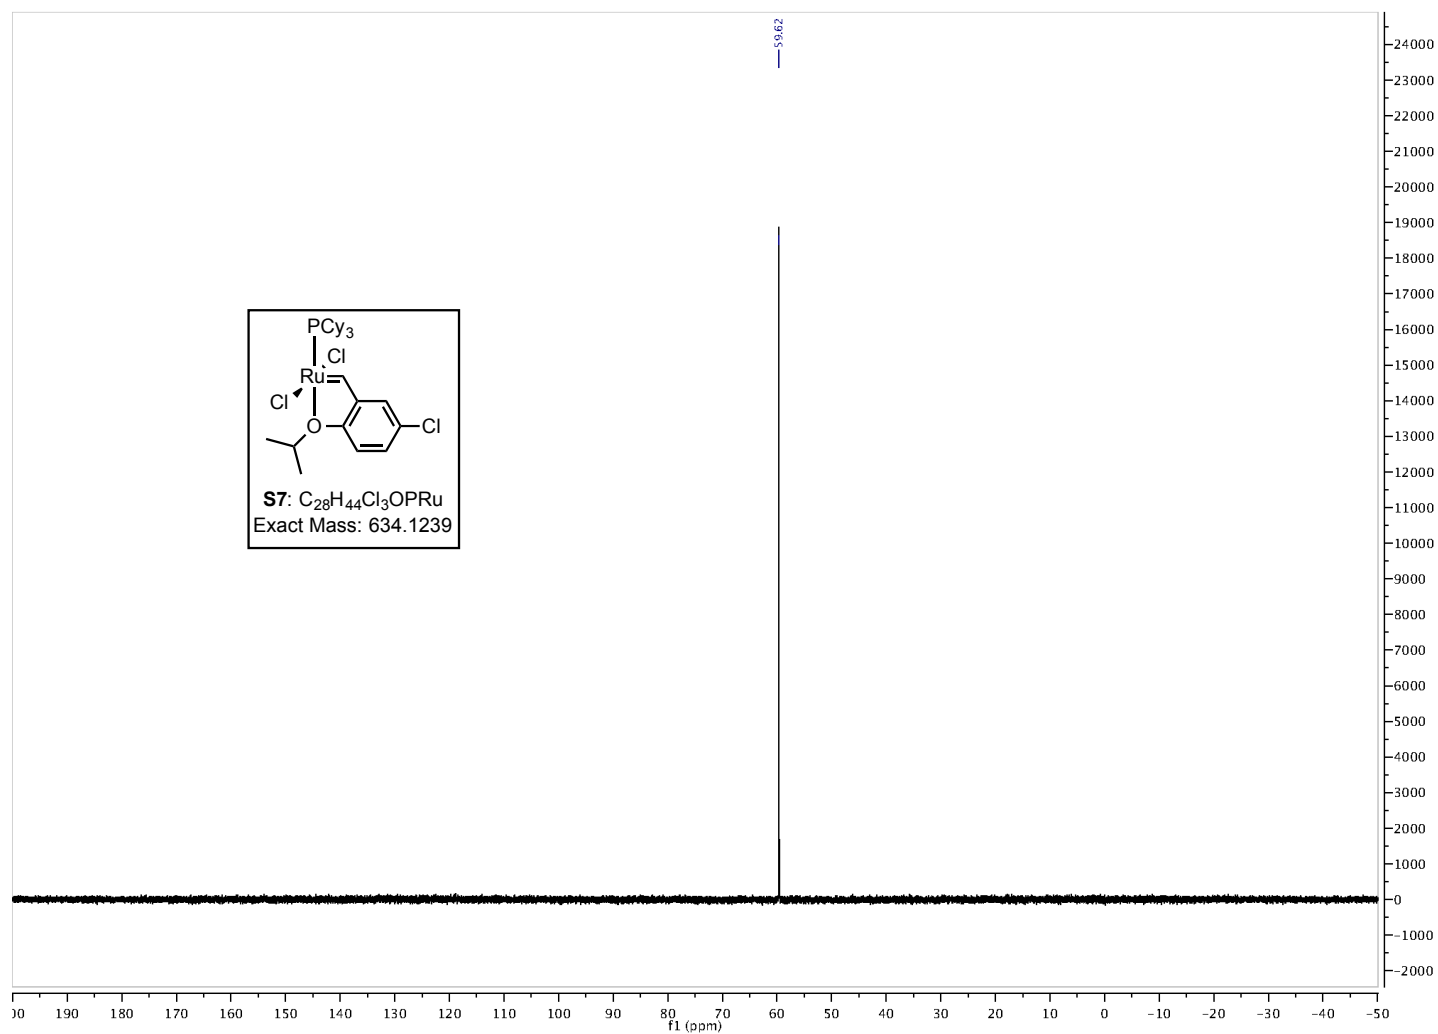



$^1\text{H}$  NMR (500 MHz,  $\text{C}_6\text{D}_6$ ) spectrum of compound **S3**.

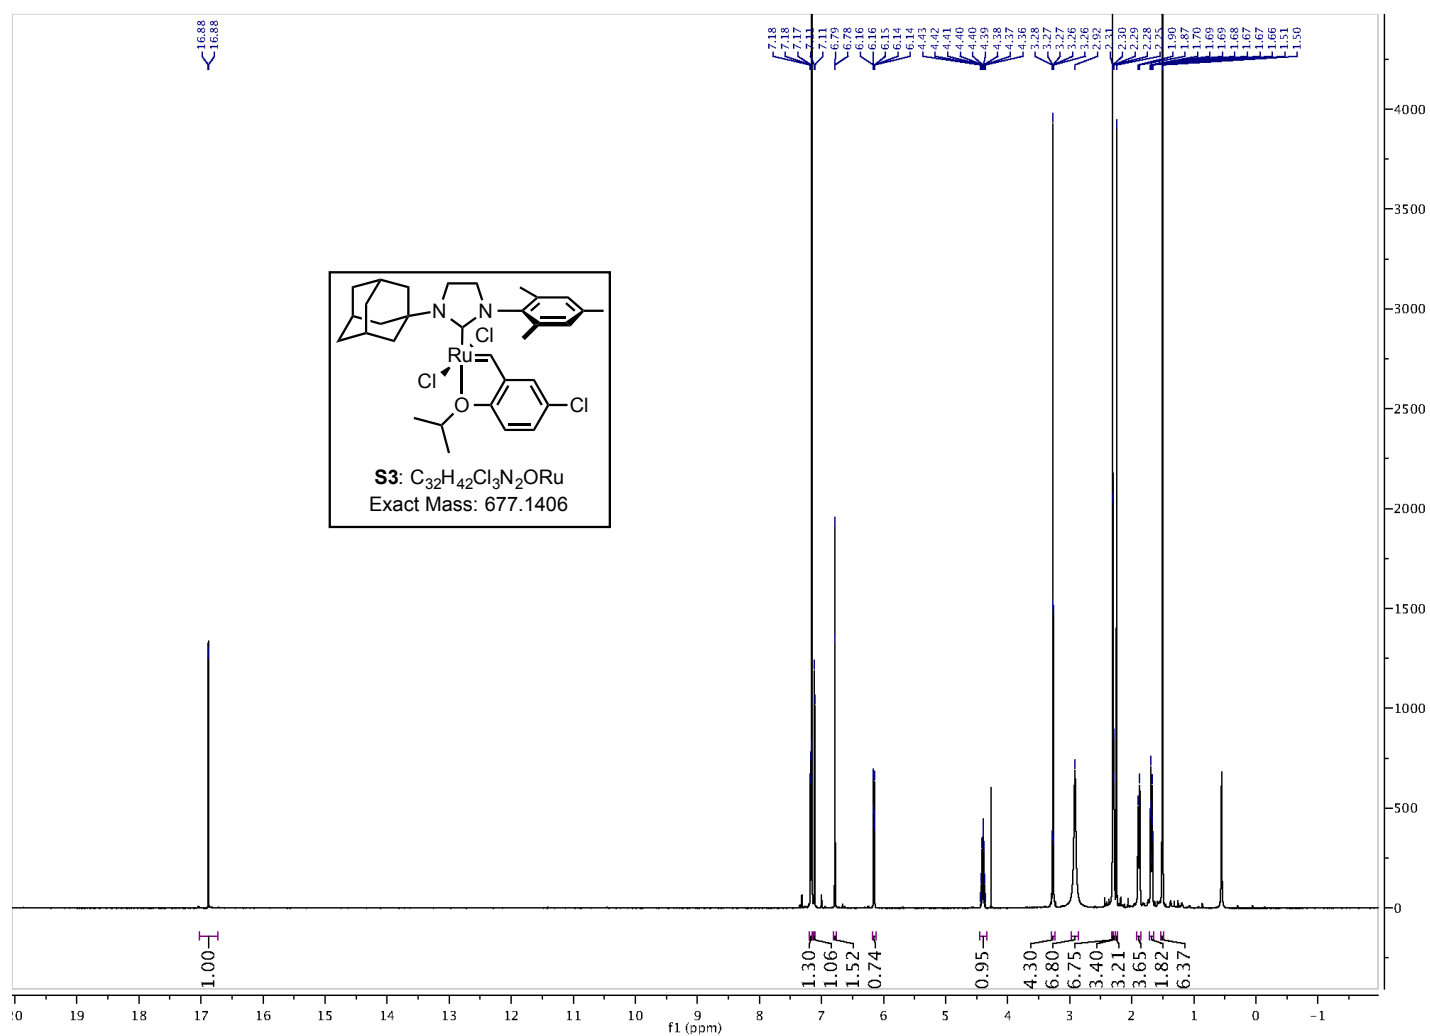

$^{13}\text{C}$  NMR (126 MHz,  $\text{C}_6\text{D}_6$ ) spectrum of compound **S3**.

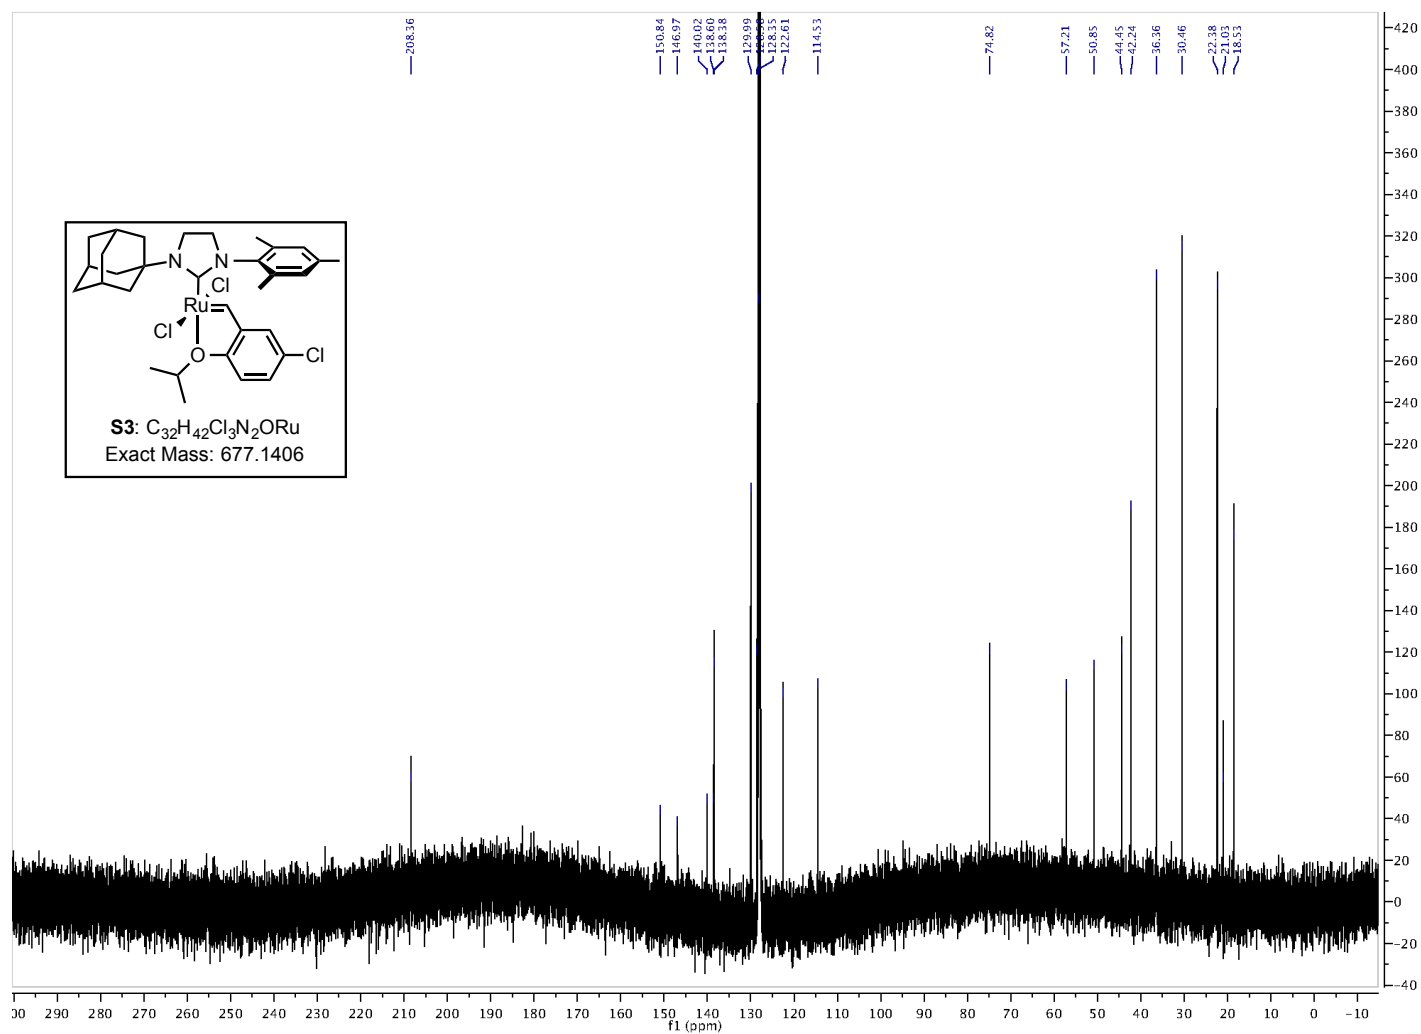

$^1\text{H}$  NMR (500 MHz,  $\text{C}_6\text{D}_6$ ) spectrum of compound **S2**.

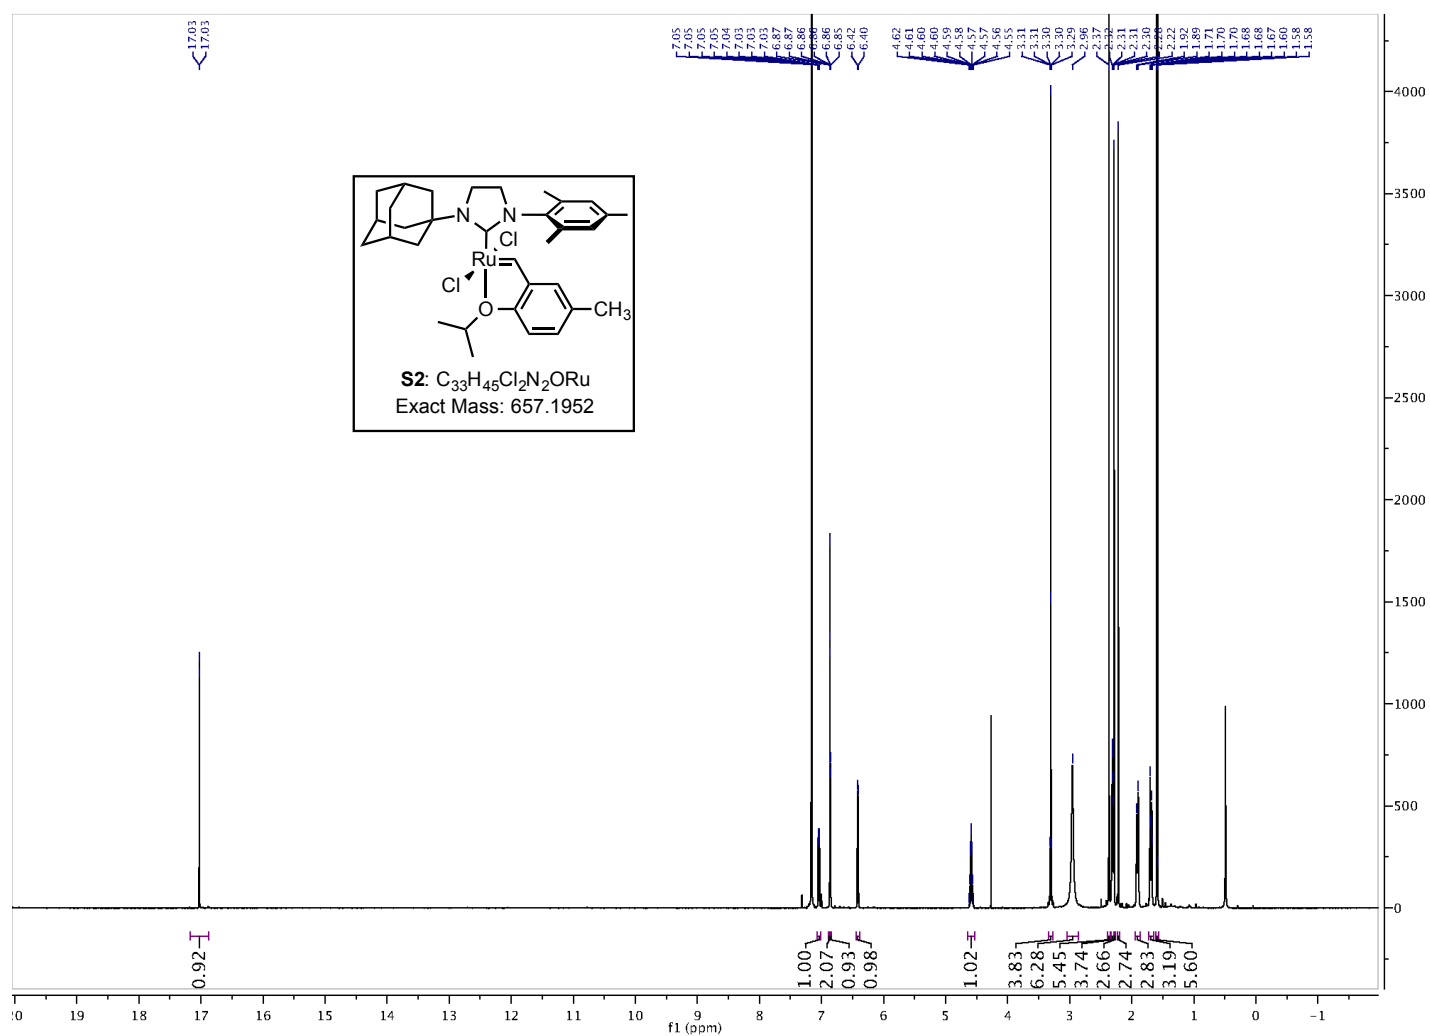

$^{13}\text{C}$  NMR (126 MHz,  $\text{C}_6\text{D}_6$ ) spectrum of compound **S2**.

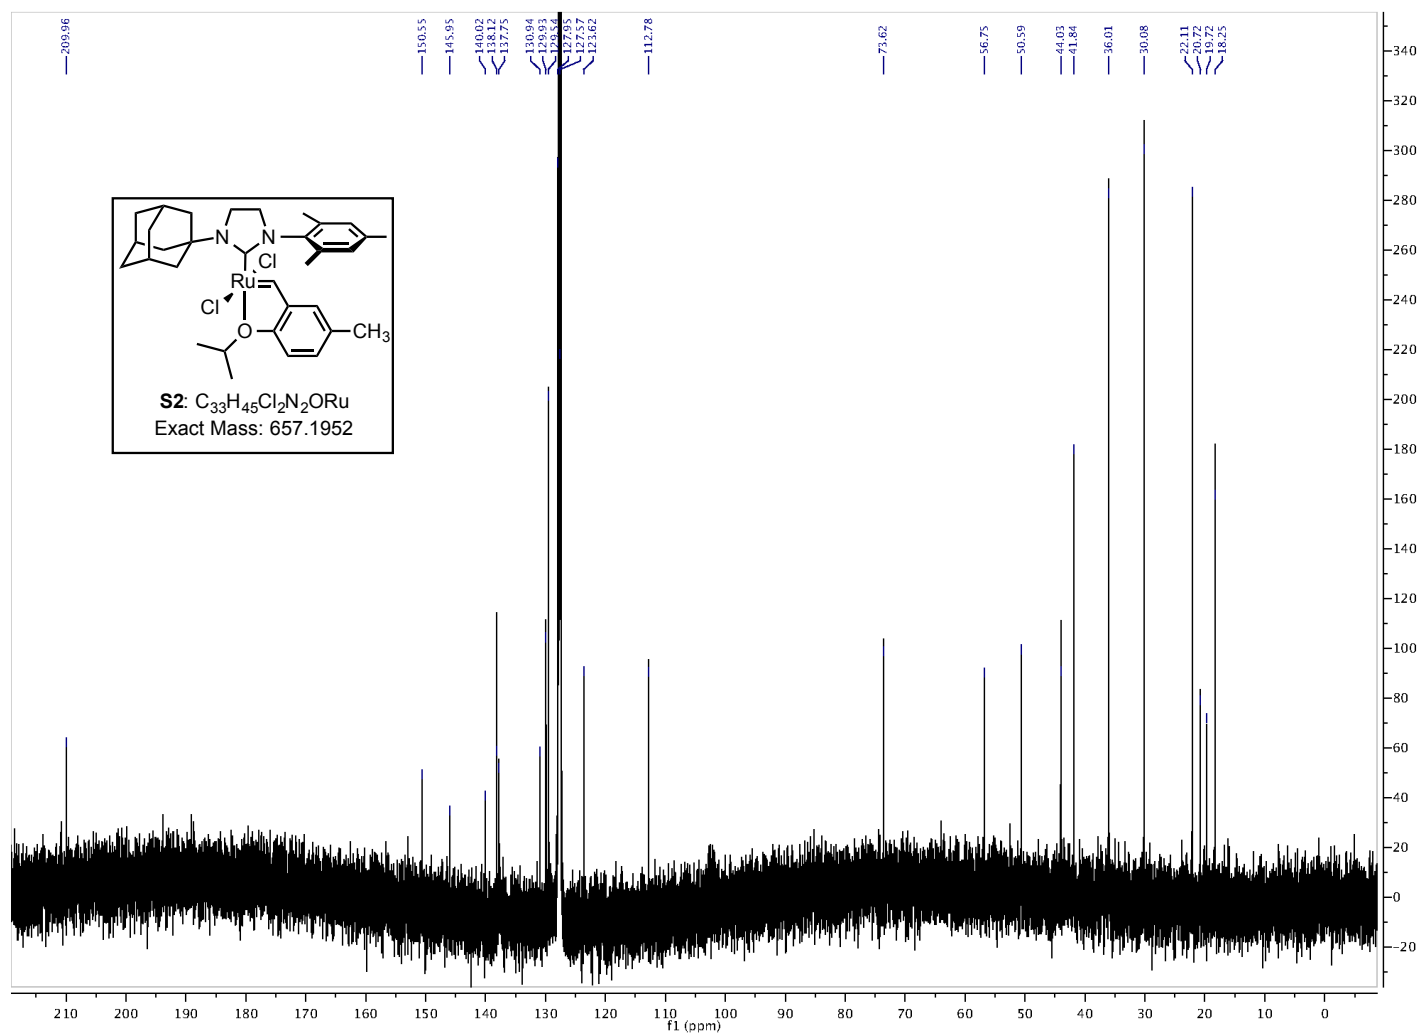



$^{13}\text{C}$  NMR (126 MHz,  $\text{C}_6\text{D}_6$ ) spectrum of compound **S1**.

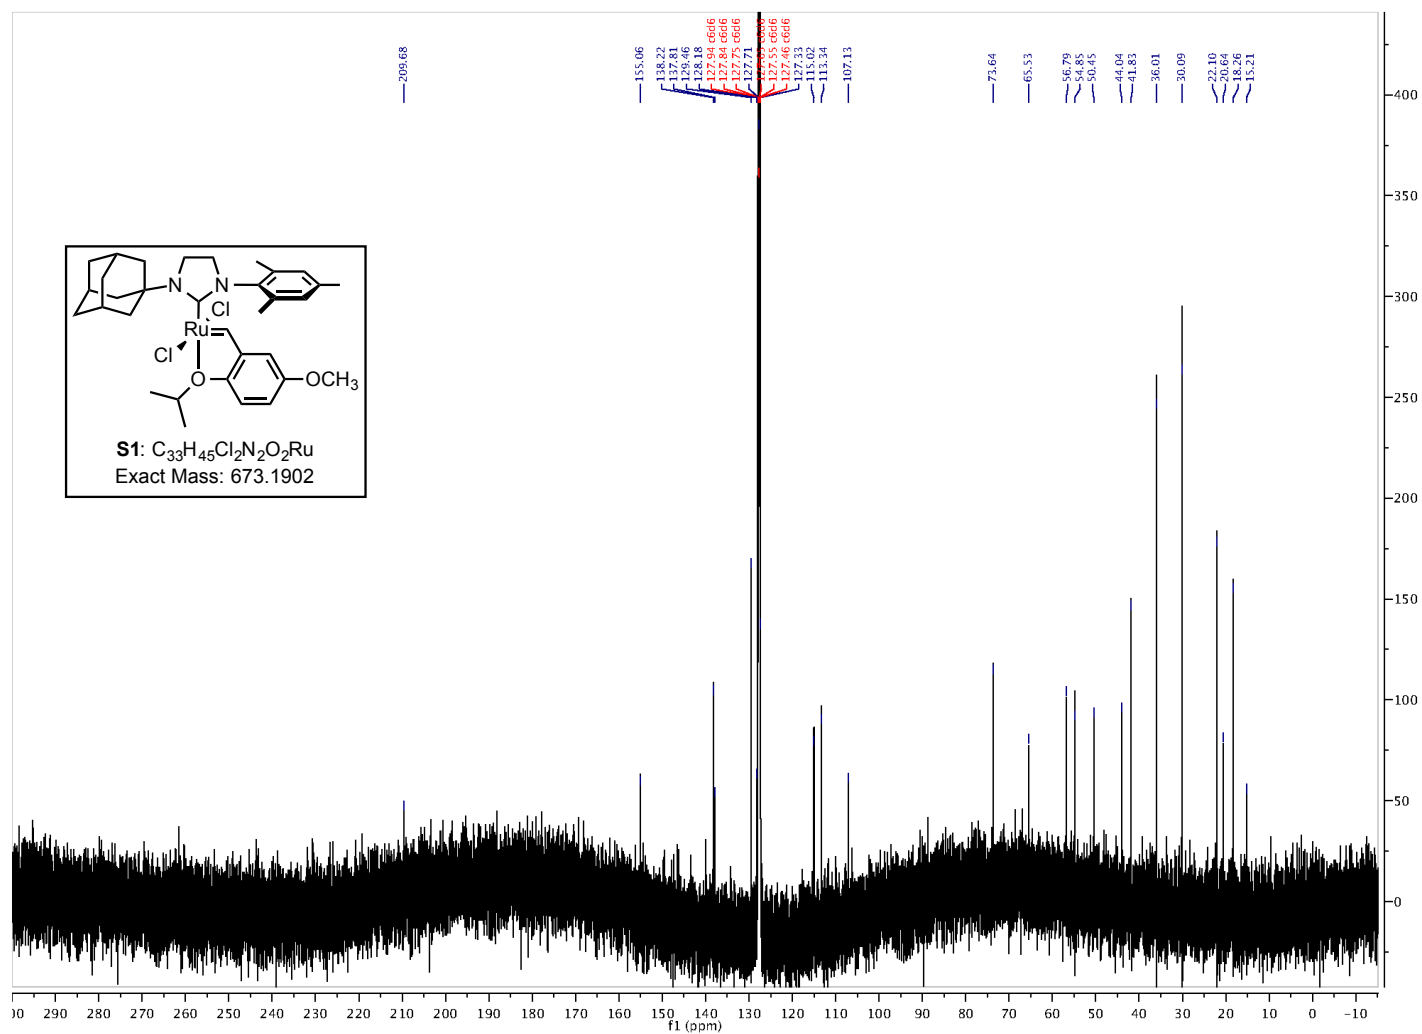

$^1\text{H}$  NMR (400 MHz,  $\text{CDCl}_3$ ) spectrum of compound **S8**.

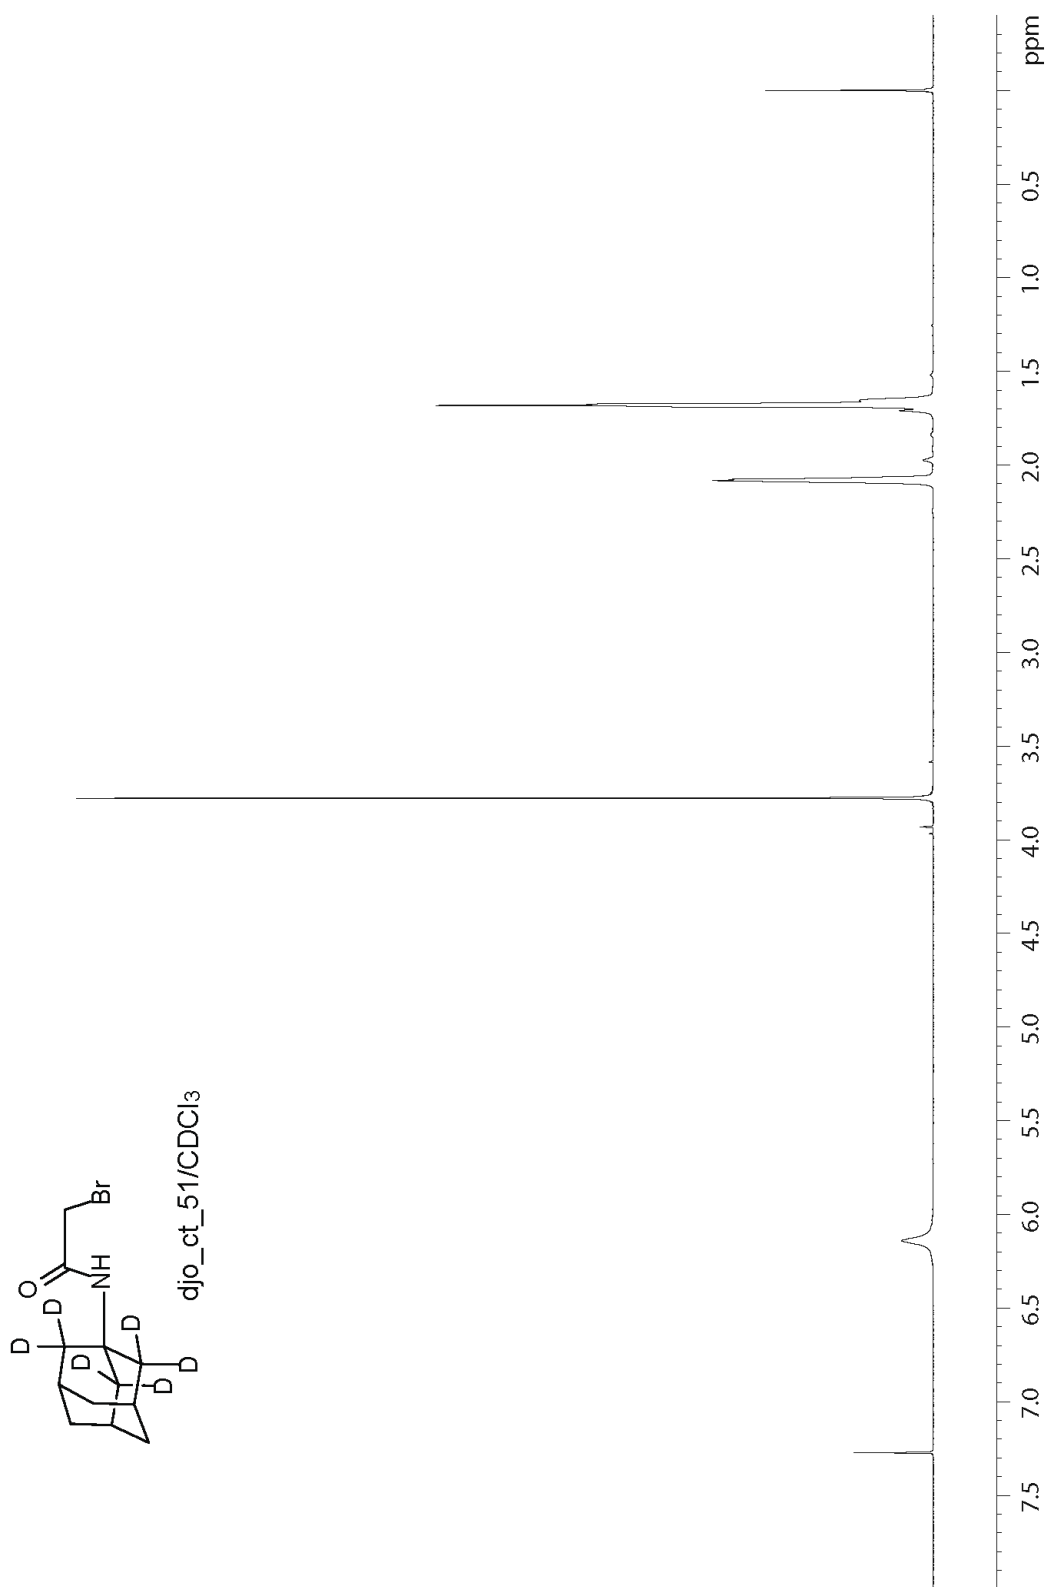

$^{13}\text{C}$  NMR (100 MHz,  $\text{CDCl}_3$ ) spectrum of compound **S8**.

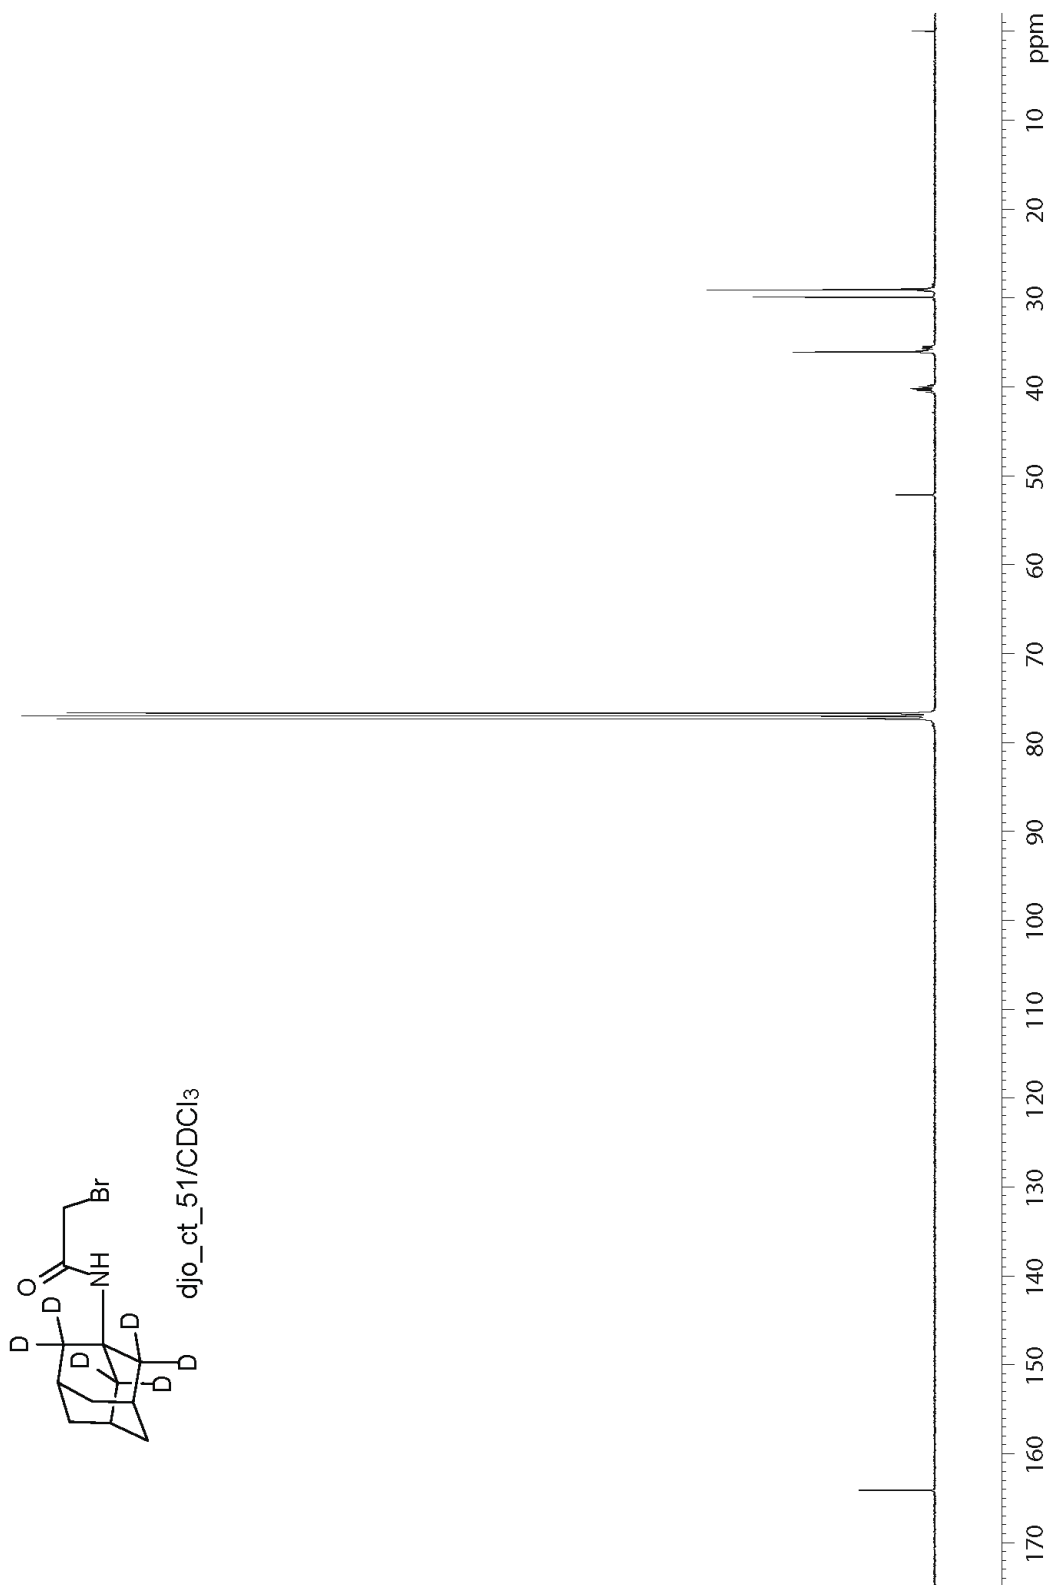



$^1\text{H}$  NMR (400 MHz,  $\text{CDCl}_3$ ) spectrum of compound **S9**.

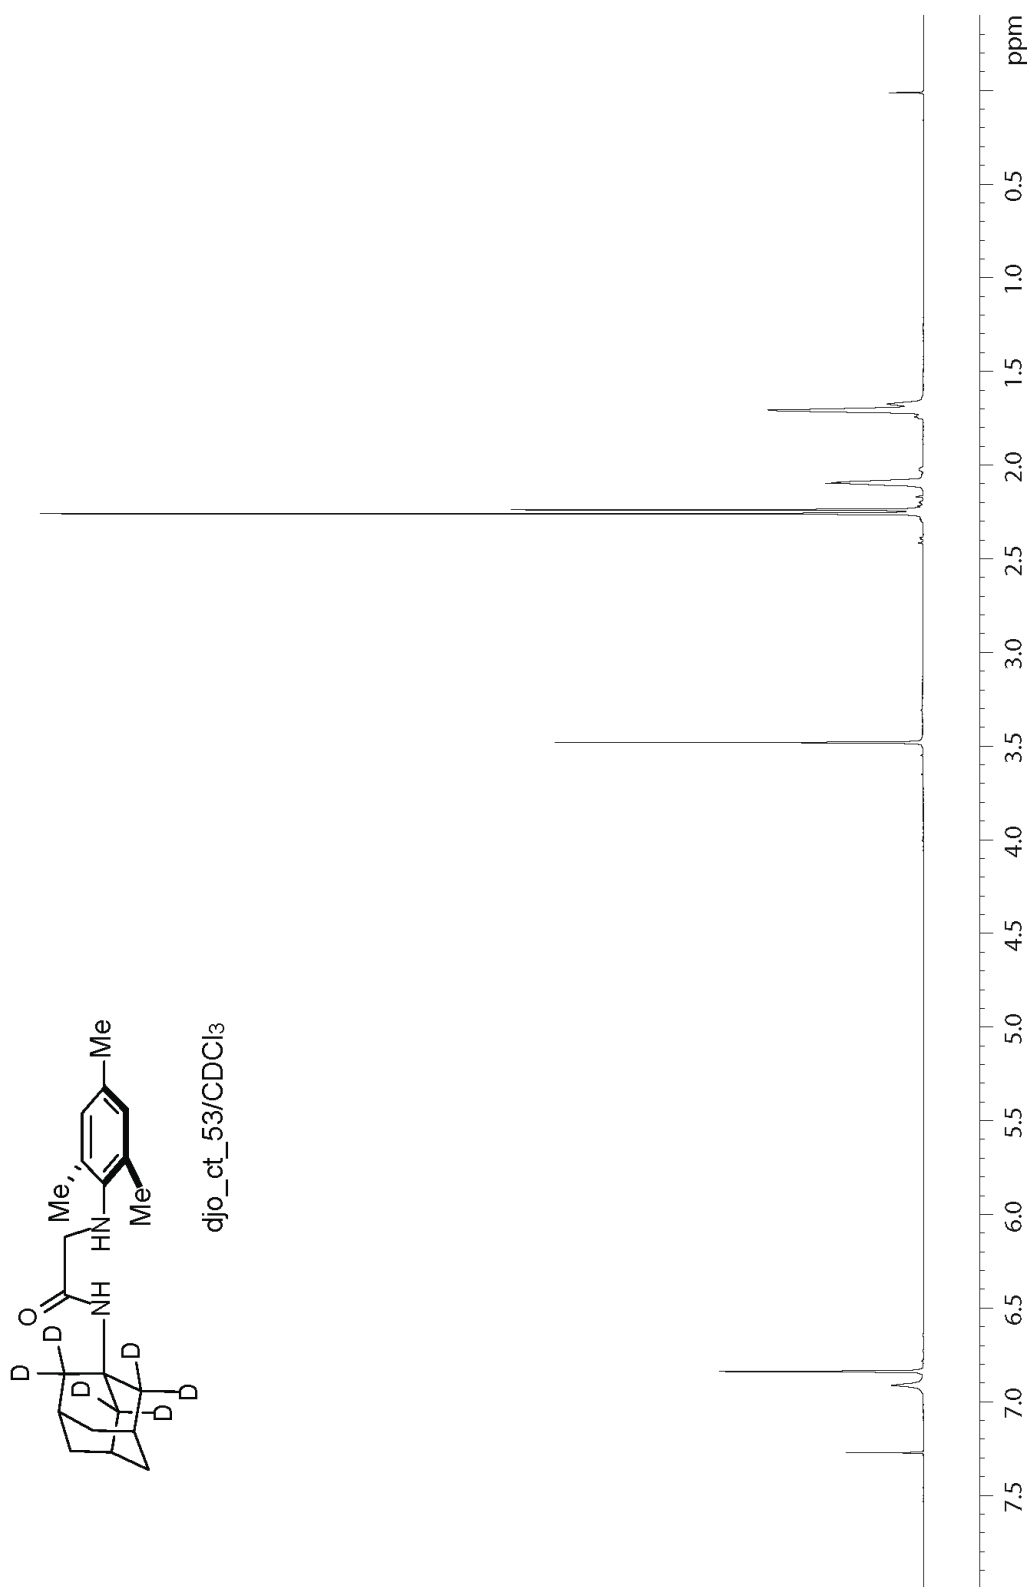

$^{13}\text{C}$  NMR (100 MHz,  $\text{CDCl}_3$ ) spectrum of compound **S9**.

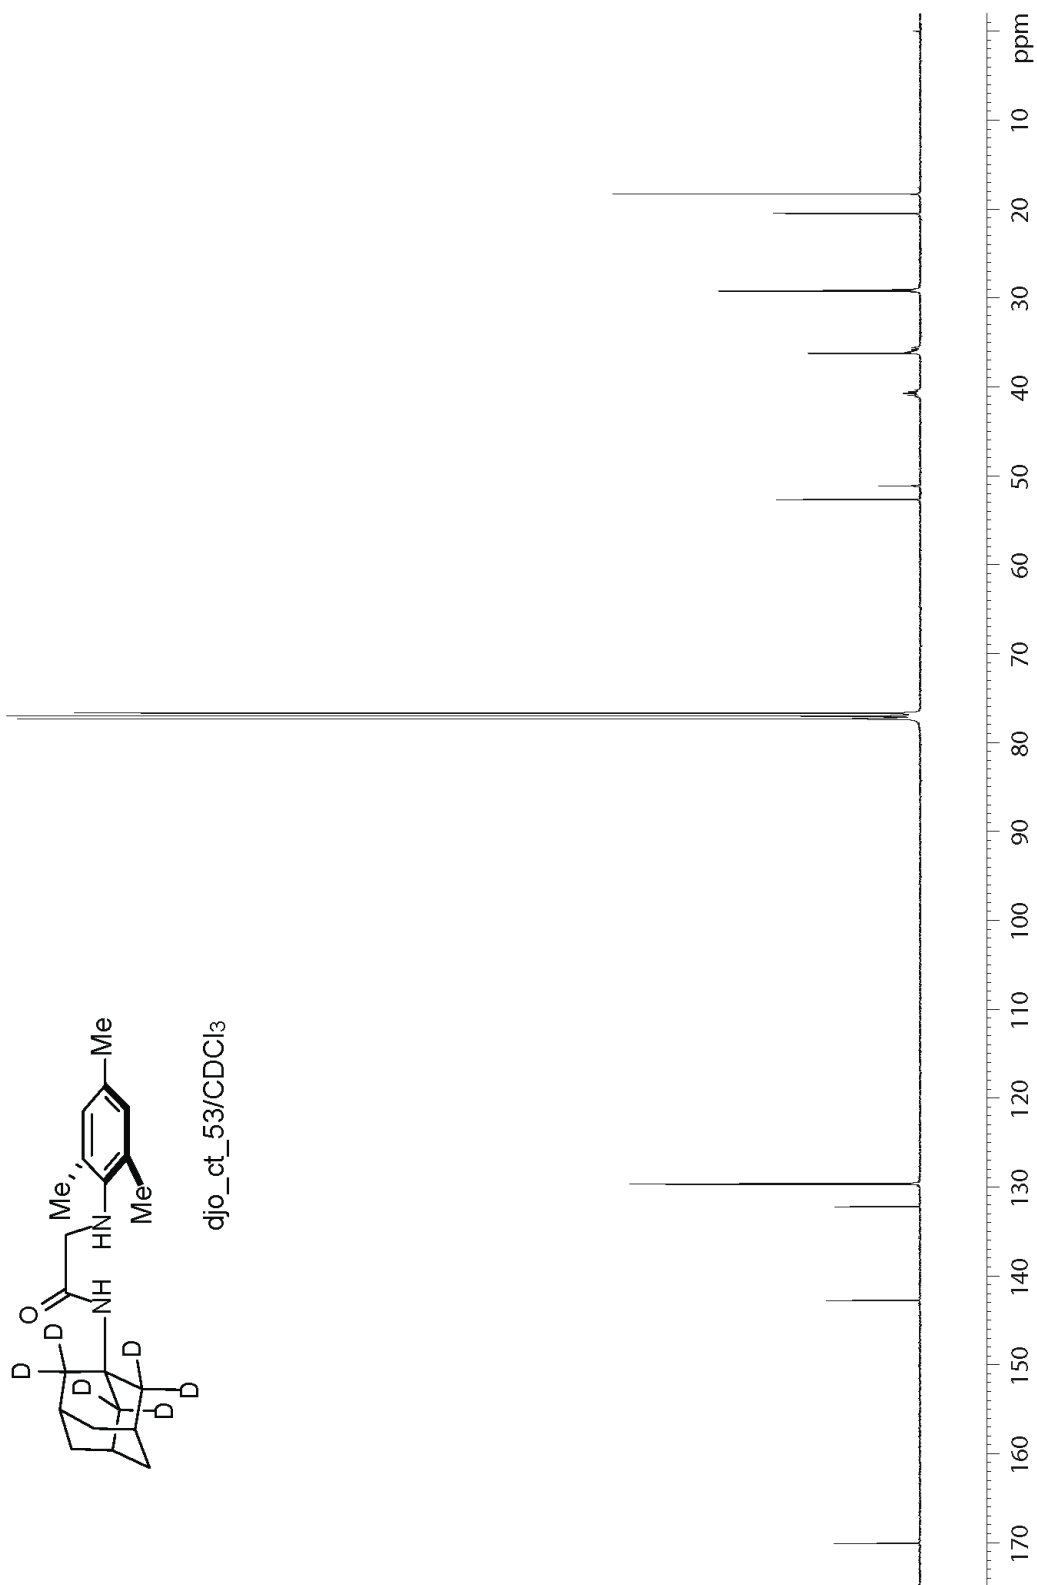

$^1\text{H}$  NMR (400 MHz,  $\text{DMSO-}d_6$ ) spectrum of compound **S10**.

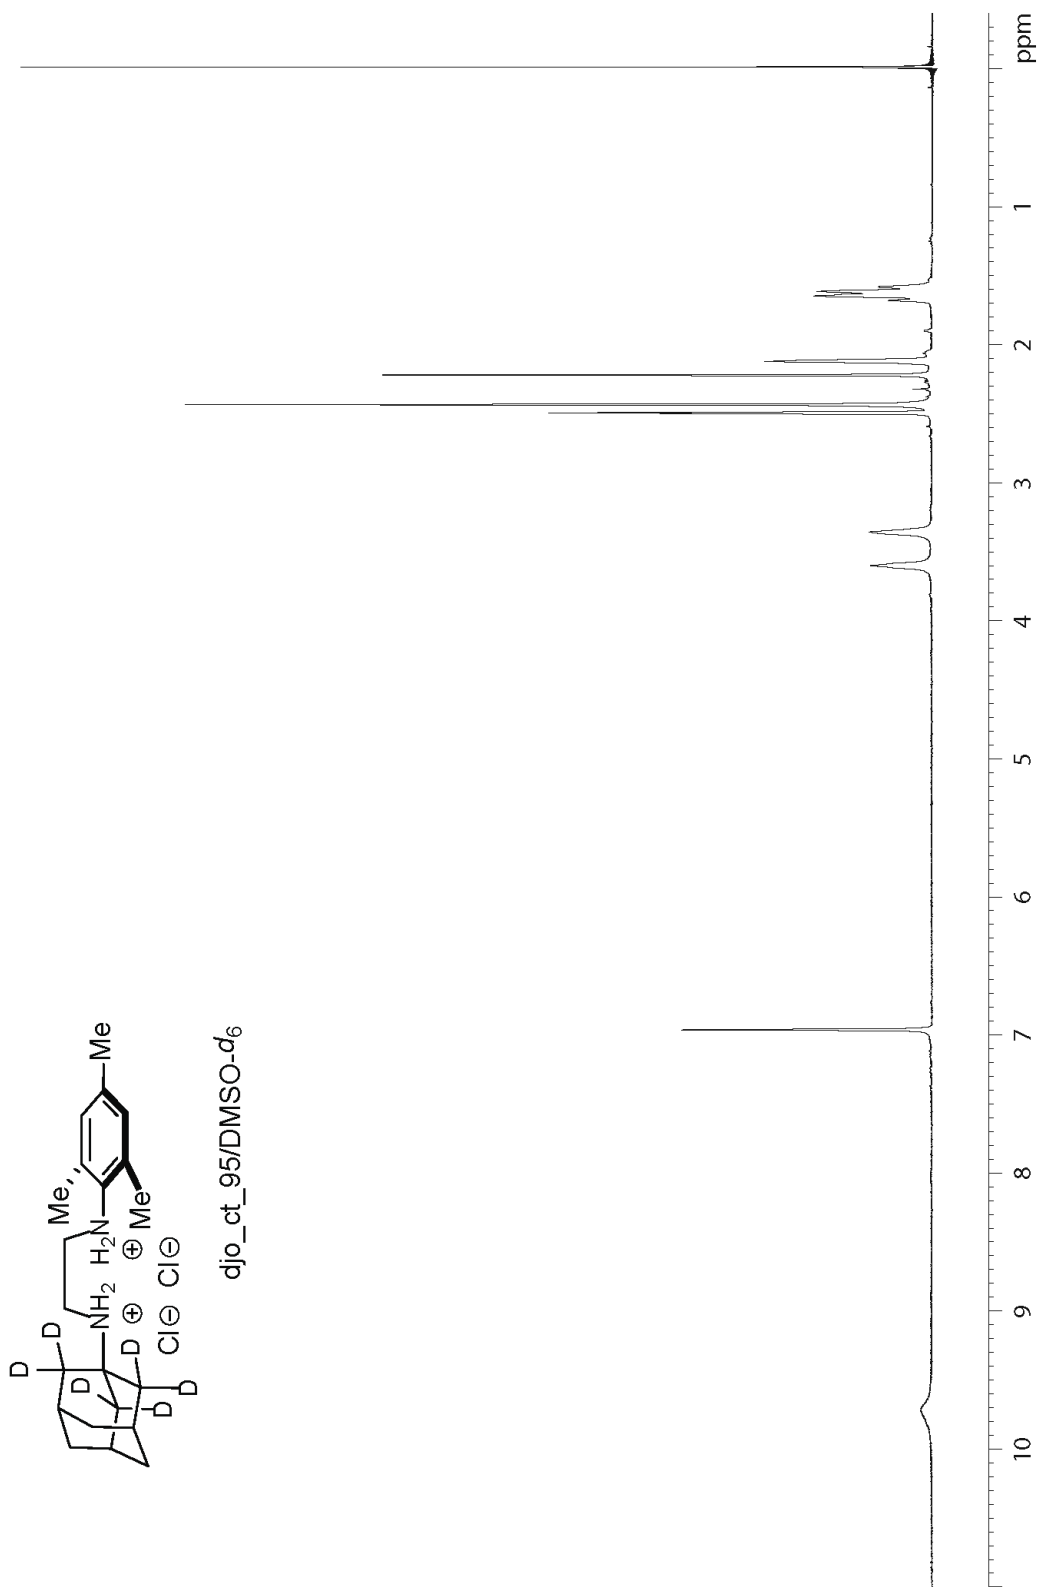

$^{13}\text{C}$  NMR (100 MHz,  $\text{DMSO-}d_6$ ) spectrum of compound **S10**.

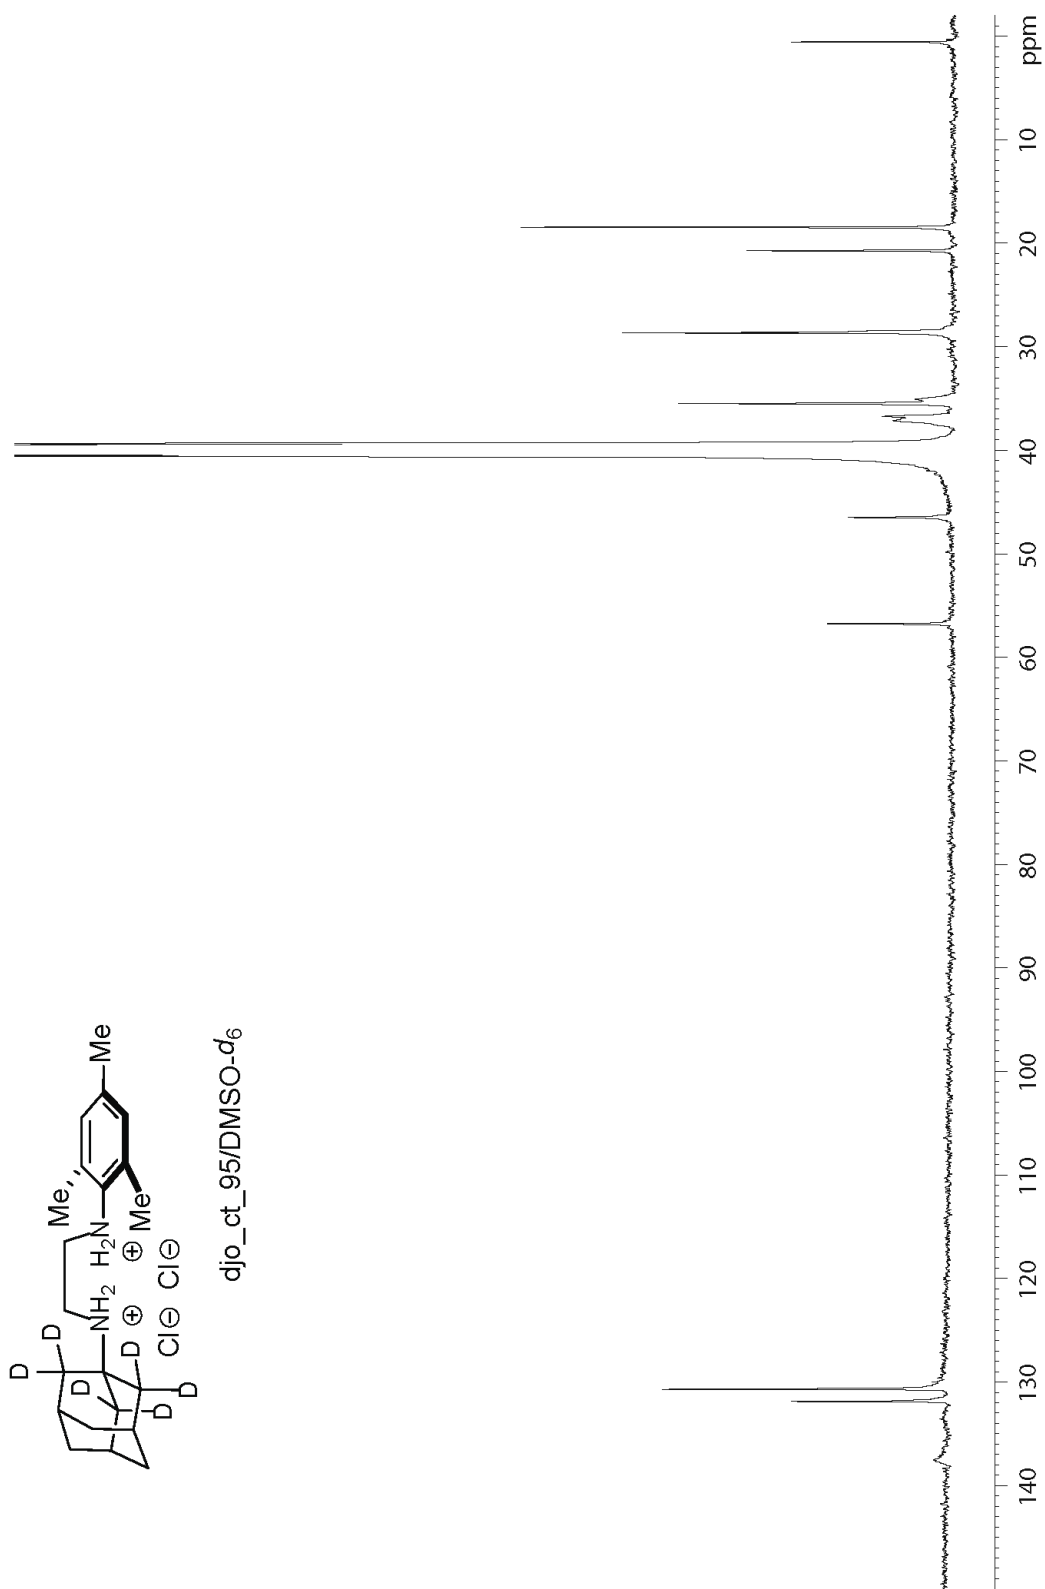

$^1\text{H}$  NMR (400 MHz,  $\text{CDCl}_3$ ) spectrum of compound **S11**.

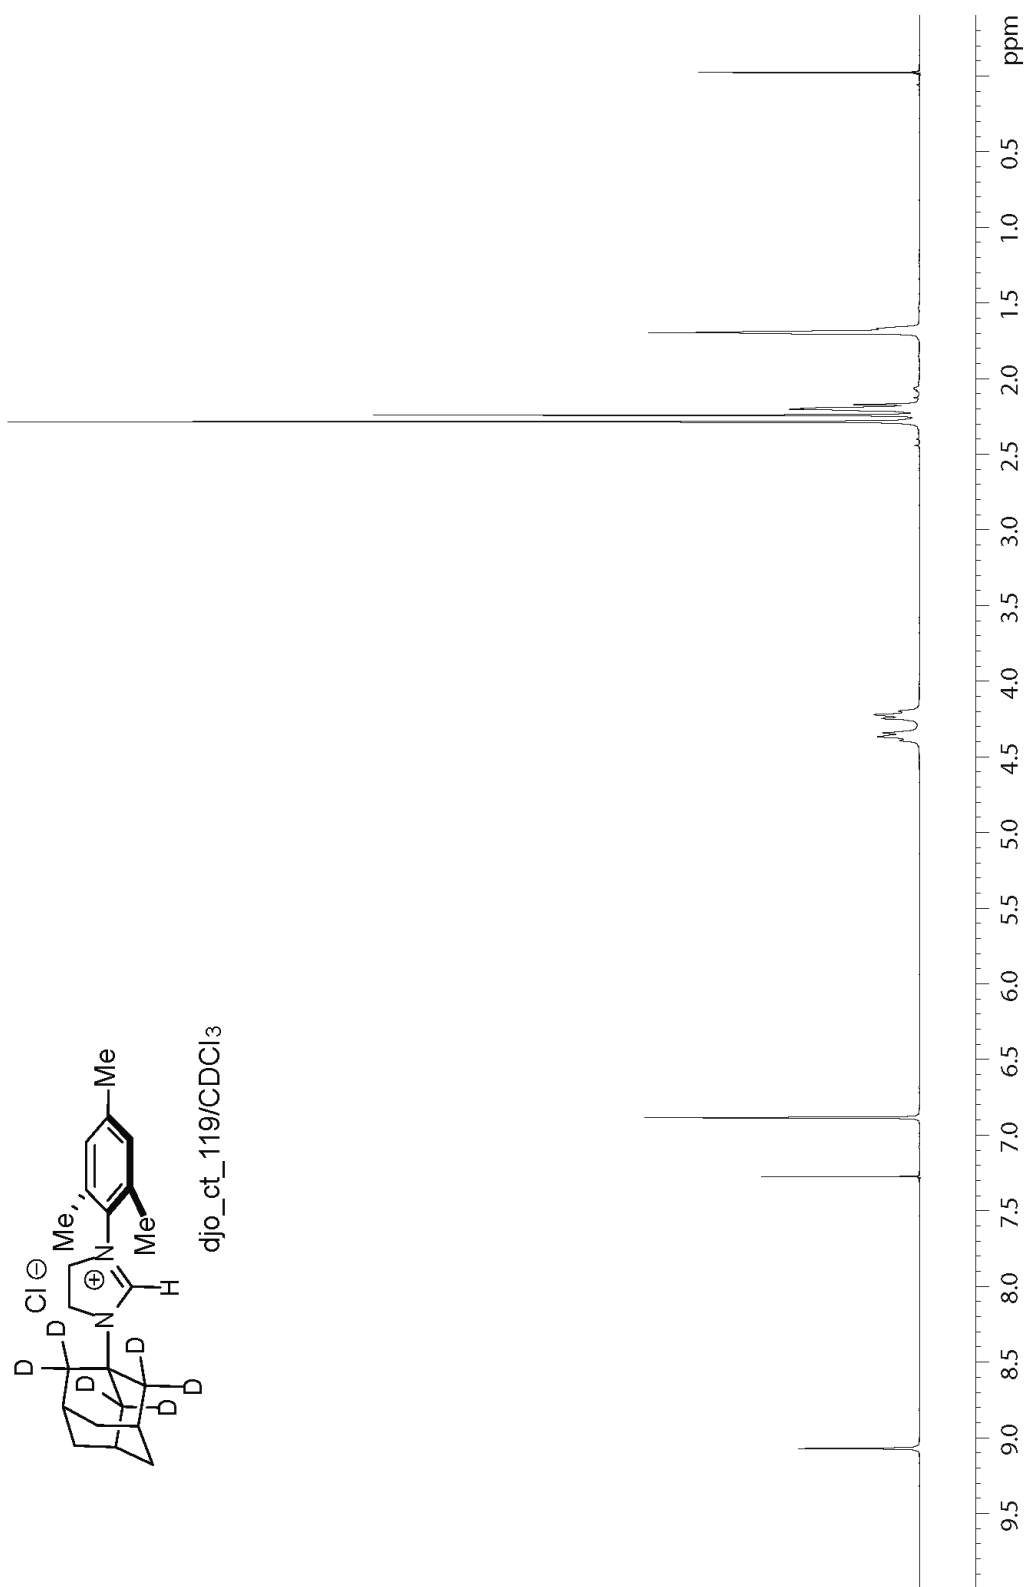

$^{13}\text{C}$  NMR (100 MHz,  $\text{CDCl}_3$ ) spectrum of compound **S11**.

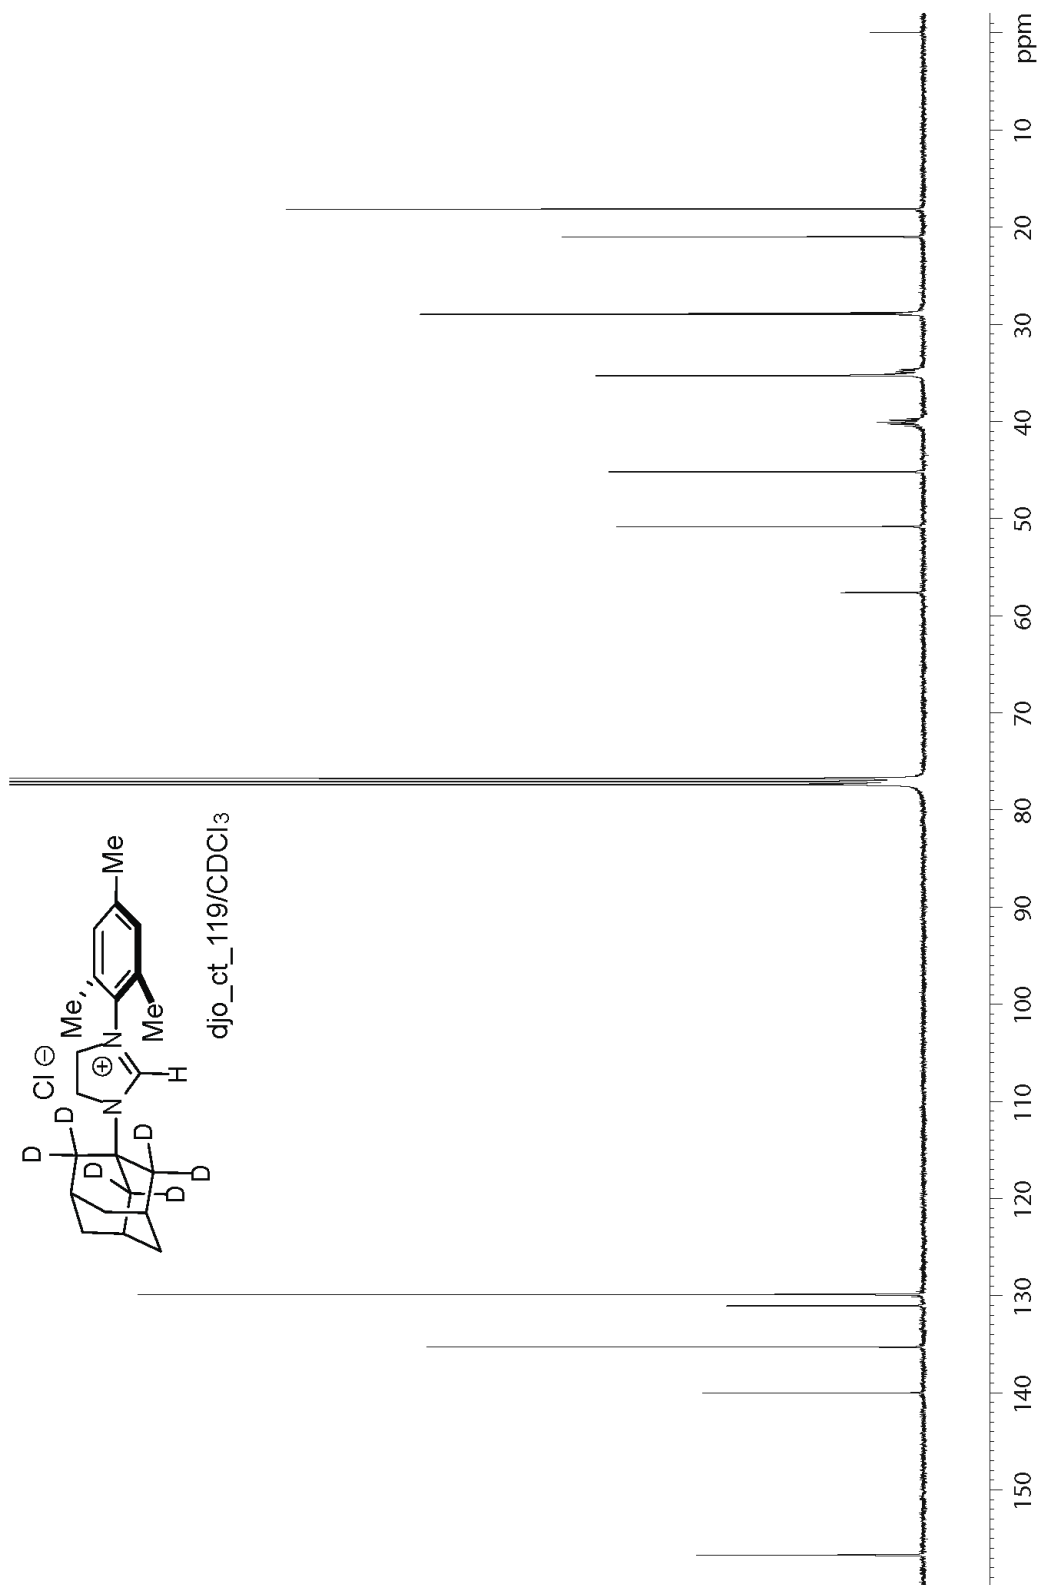

$^1\text{H}$  NMR (500 MHz,  $\text{C}_6\text{D}_6$ ) spectrum of compound **4a-d<sub>6</sub>**.

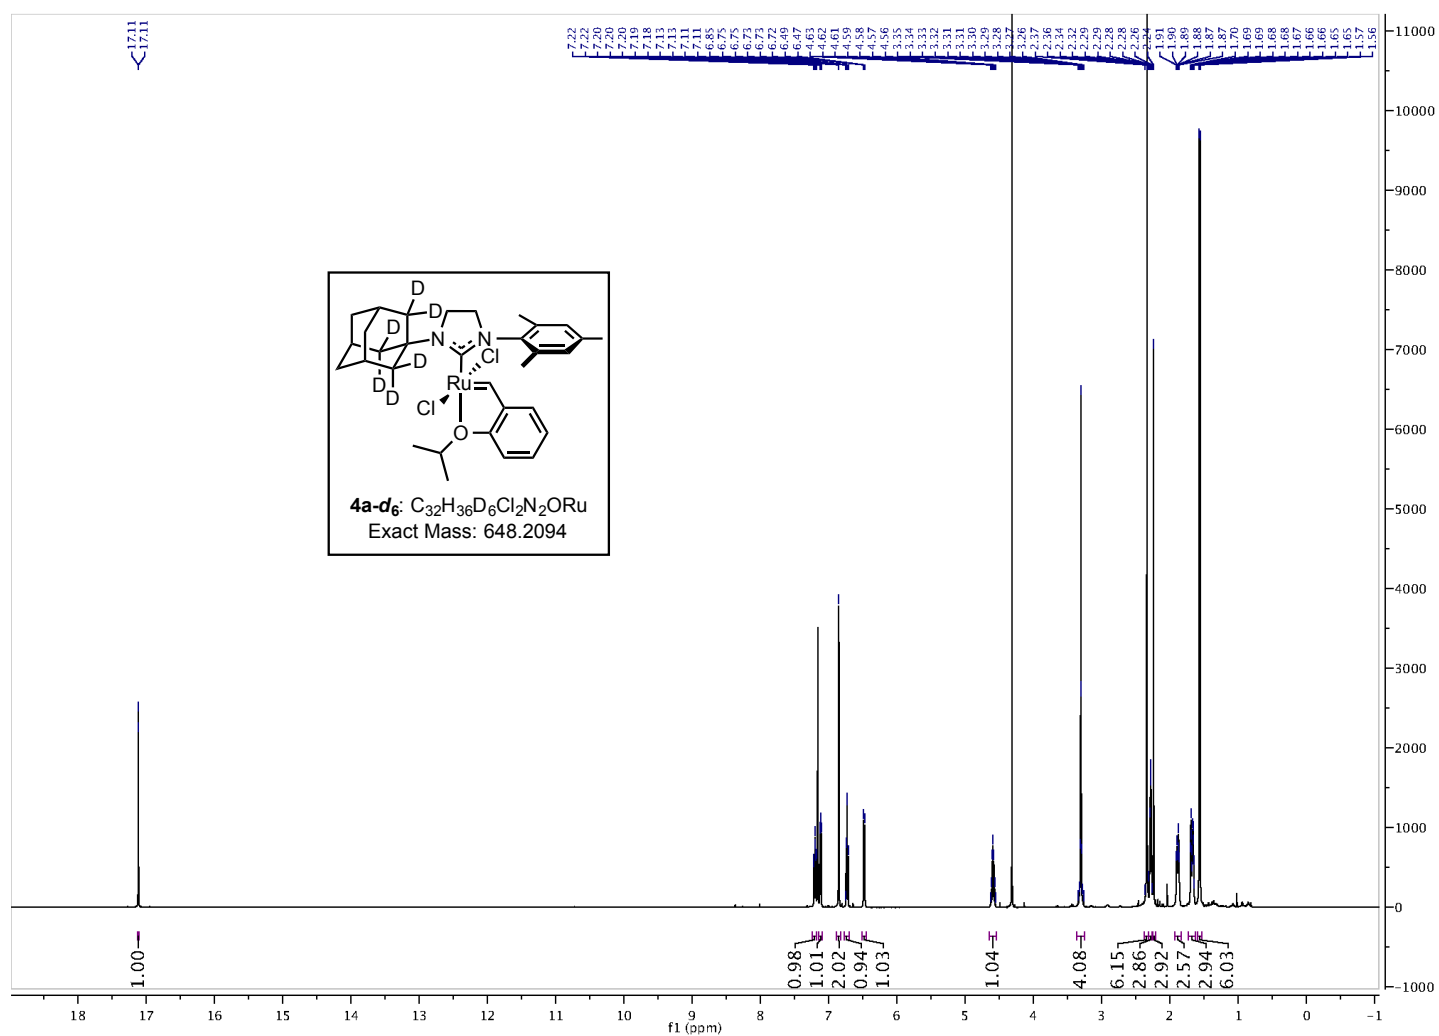

$^{13}\text{C}$  NMR (126 MHz,  $\text{C}_6\text{D}_6$ ) spectrum of compound **4a-d<sub>6</sub>**.

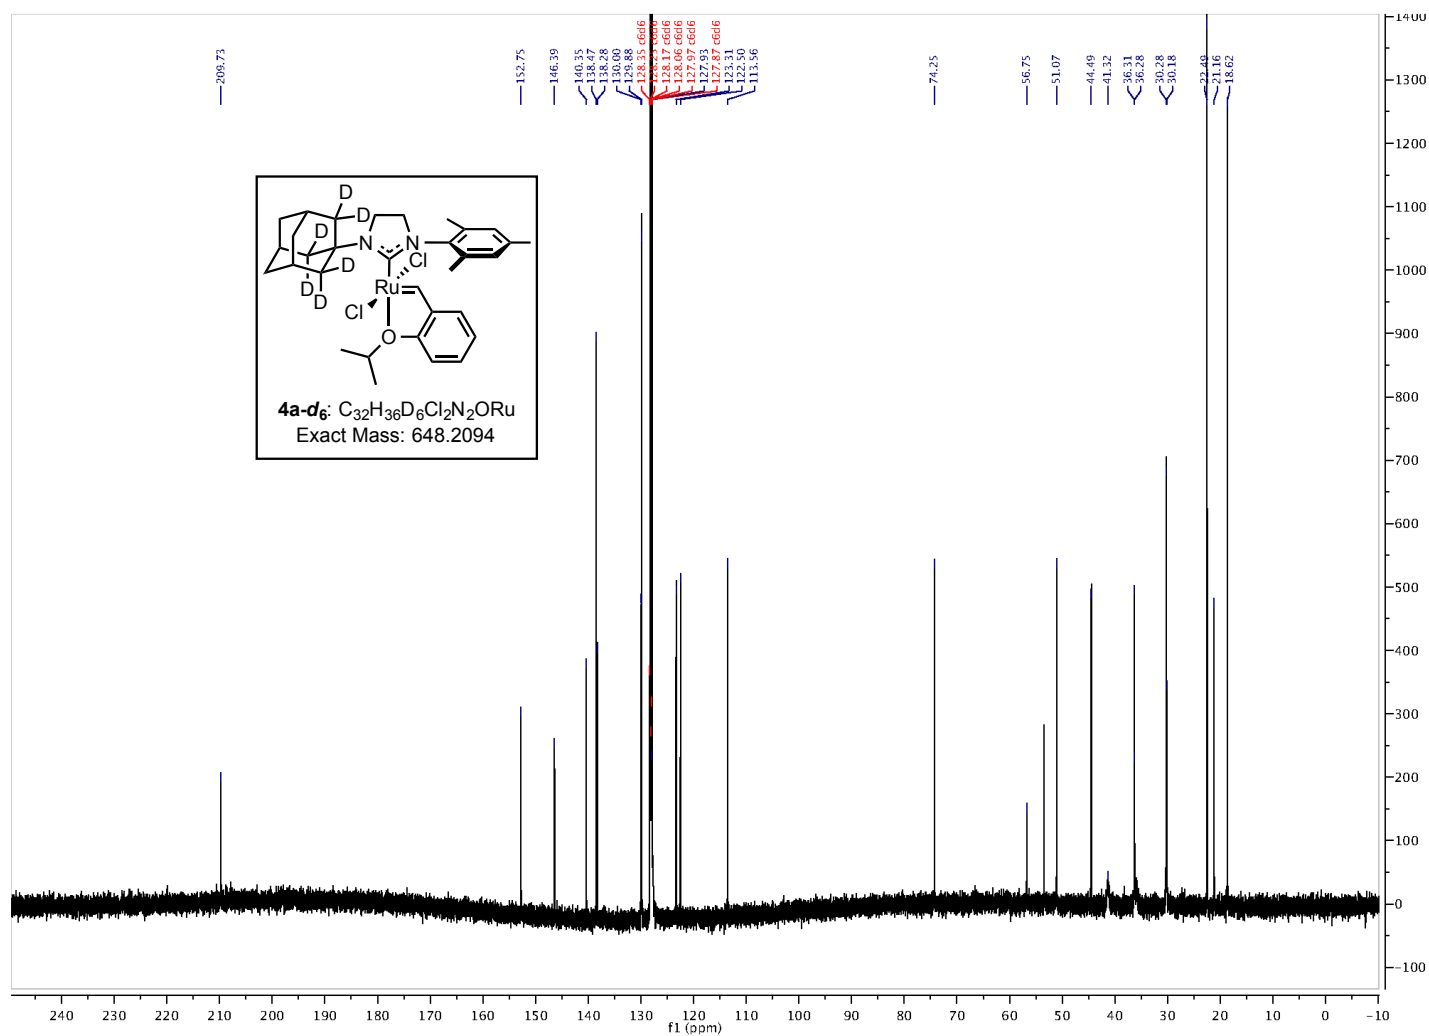





$^{13}\text{C}$  NMR (126 MHz,  $\text{C}_6\text{D}_6$ ) spectrum of compound **7a-d<sub>6</sub>**.

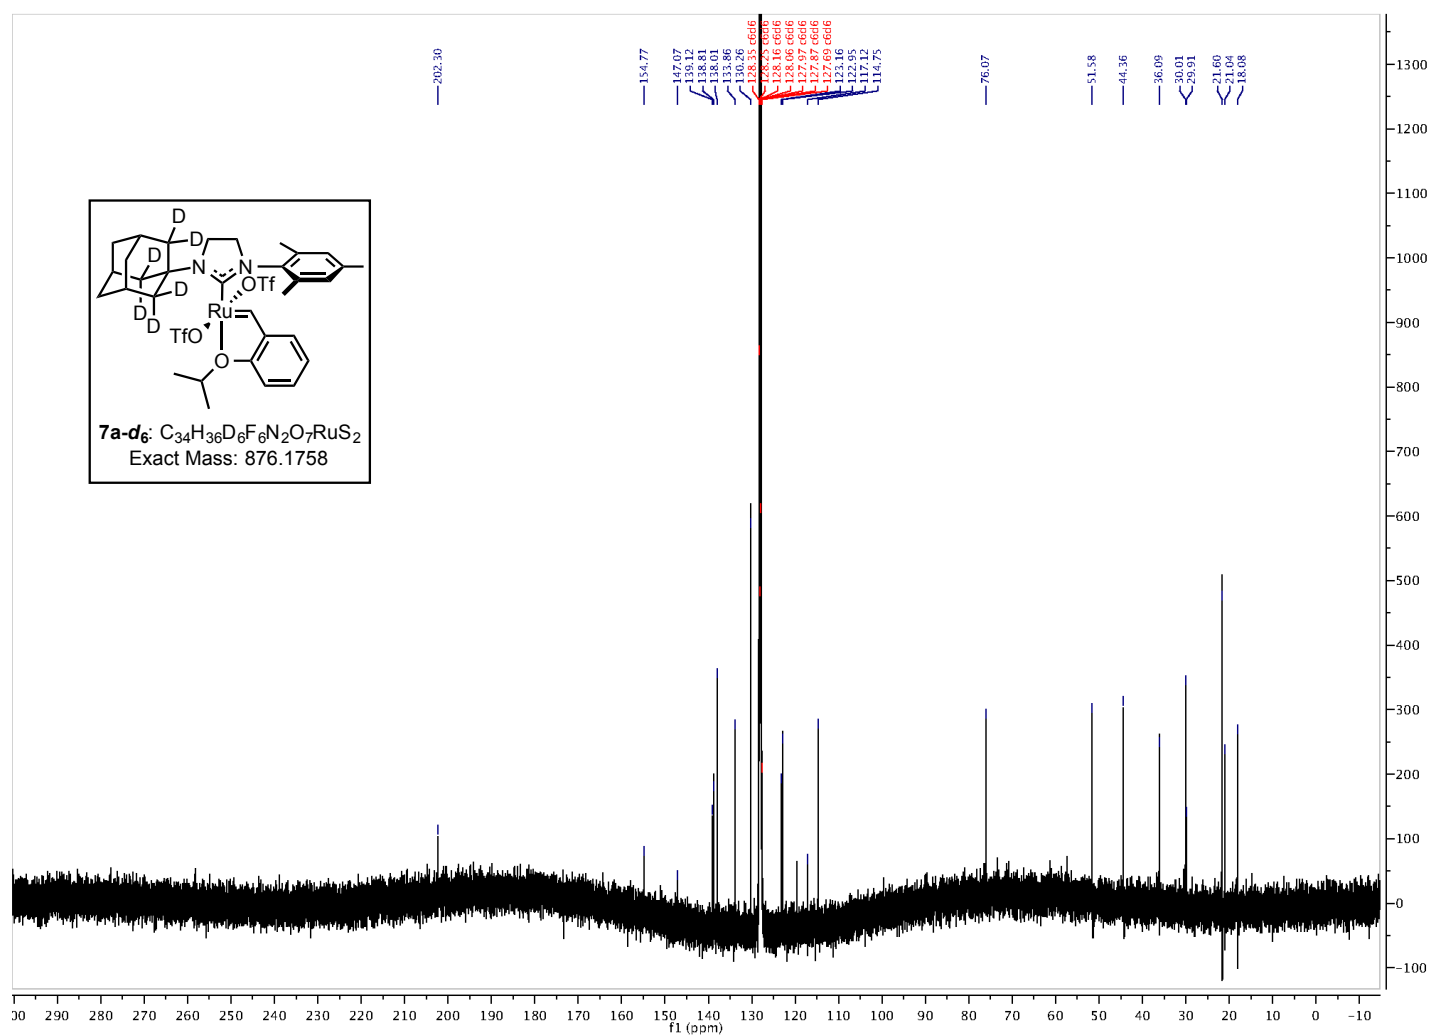



$^{13}\text{C}$  NMR (126 MHz,  $\text{C}_6\text{D}_6$ ) spectrum of compound **3a-d<sub>6</sub>**.

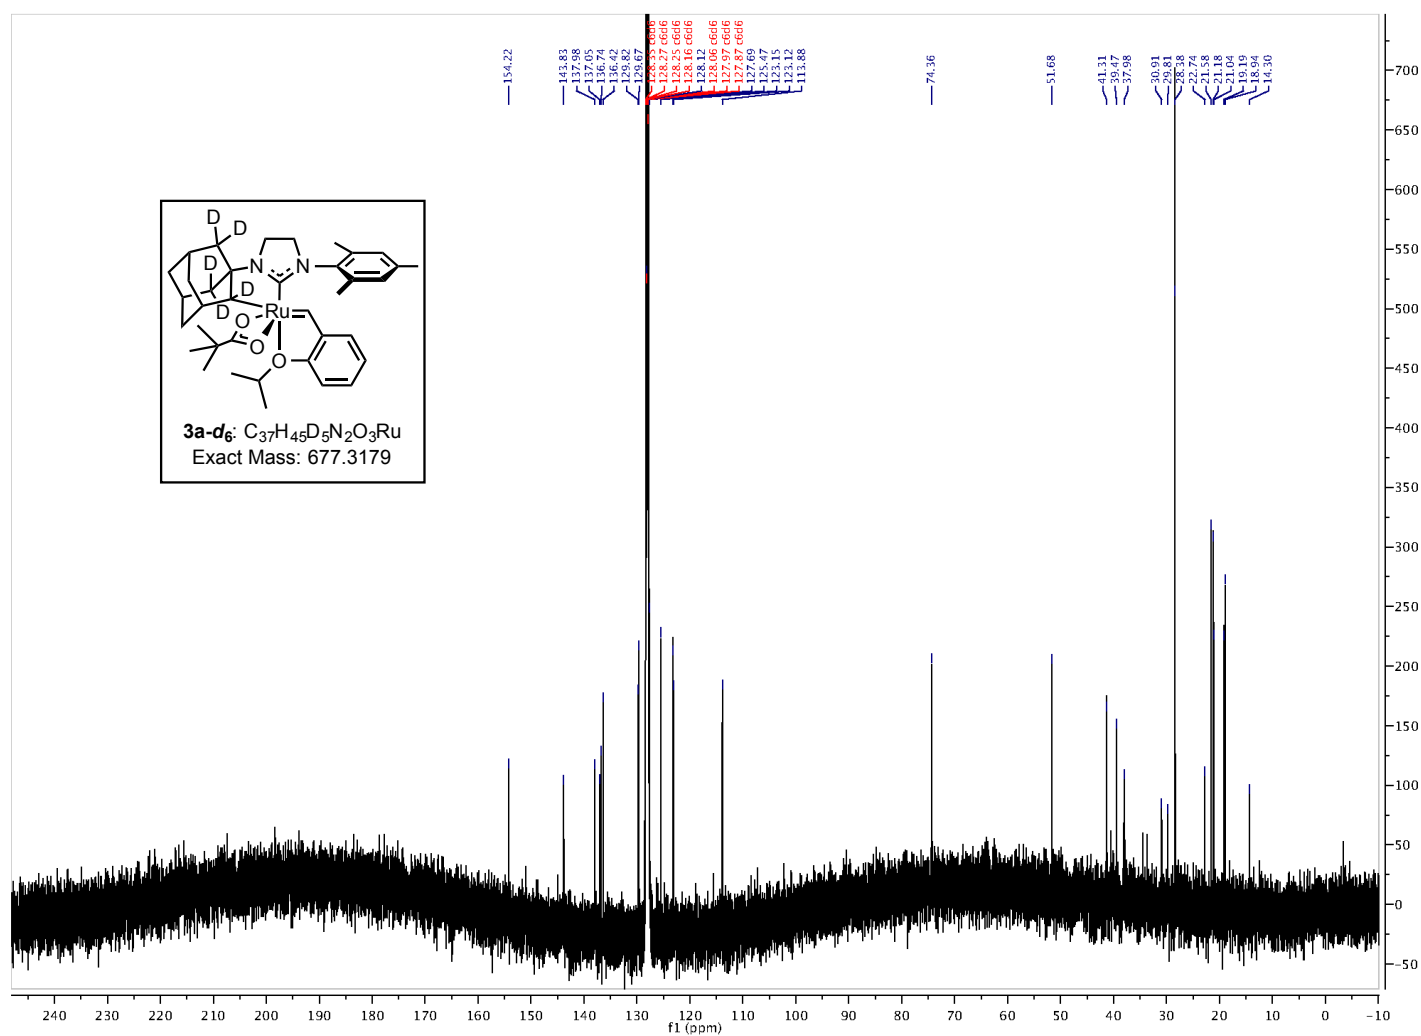

Supplement: ja5021958_si_001.pdf [file ja5021958_si_001.pdf]
